# Supplementary material for: Understanding resilience among transition-age youth with serious mental illness: protocol for a scoping review
Source: PubMed Central journal article supplement — BMJ Open. 2022 Sep 19;12(9):e059826. doi: 10.1136/bmjopen-2021-059826 (PMC9486183; doi:10.1136/bmjopen-2021-059826), 2022-09-19
Supplement: bmjopen-2021-059826.draft_revisions.pdf [file bmjopen-2021-059826.draft_revisions.pdf]

# BMJ Open

BMJ Open is committed to open peer review. As part of this commitment we make the peer review history of every article we publish publicly available.

When an article is published we post the peer reviewers' comments and the authors' responses online. We also post the versions of the paper that were used during peer review. These are the versions that the peer review comments apply to.

The versions of the paper that follow are the versions that were submitted during the peer review process. They are not the versions of record or the final published versions. They should not be cited or distributed as the published version of this manuscript.

BMJ Open is an open access journal and the full, final, typeset and author-corrected version of record of the manuscript is available on our site with no access controls, subscription charges or pay-per-view fees (<http://bmjopen.bmj.com>).

If you have any questions on BMJ Open's open peer review process please email [info.bmjopen@bmj.com](mailto:info.bmjopen@bmj.com)

# BMJ Open

## Understanding resilience among transition-age youth with serious mental illness: Protocol for a scoping review

|                               |                                                                                                                                                                                                                                                                                                                                                                                                                                                                                                                                                                                    |
|-------------------------------|------------------------------------------------------------------------------------------------------------------------------------------------------------------------------------------------------------------------------------------------------------------------------------------------------------------------------------------------------------------------------------------------------------------------------------------------------------------------------------------------------------------------------------------------------------------------------------|
| Journal:                      | <i>BMJ Open</i>                                                                                                                                                                                                                                                                                                                                                                                                                                                                                                                                                                    |
| Manuscript ID                 | bmjopen-2021-059826                                                                                                                                                                                                                                                                                                                                                                                                                                                                                                                                                                |
| Article Type:                 | Protocol                                                                                                                                                                                                                                                                                                                                                                                                                                                                                                                                                                           |
| Date Submitted by the Author: | 02-Dec-2021                                                                                                                                                                                                                                                                                                                                                                                                                                                                                                                                                                        |
| Complete List of Authors:     | Nesbitt, Amy; University of Toronto, Rehabilitation Sciences Institute Sabiston, Catherine; University of Toronto, Faculty of Kinesiology and Physical Education<br>deJonge, Melissa; University of Toronto, Faculty of Kinesiology and Physical Education<br>Barbic, Skye; The University of British Columbia, Occupational Science and Occupational Therapy; Foundry<br>Kozloff, Nicole; Centre for Addiction and Mental Health<br>Nalder, Emily; University of Toronto, Occupational Science and Occupational Therapy; University of Toronto, Rehabilitation Sciences Institute |
| Keywords:                     | MENTAL HEALTH, PSYCHIATRY, PUBLIC HEALTH                                                                                                                                                                                                                                                                                                                                                                                                                                                                                                                                           |
|                               |                                                                                                                                                                                                                                                                                                                                                                                                                                                                                                                                                                                    |

SCHOLARONE™  
Manuscripts

## SCOPING REVIEW PROTOCOL

1  
2  
3 1 **Understanding resilience among transition-age youth with serious mental illness: Protocol**  
4  
5 2  
6 **for a scoping review**

7  
8 3 Amy E. Nesbitt, MSc (amy.nesbitt@mail.utoronto.ca)<sup>a\*</sup>

9  
10 4 Catherine M. Sabiston, PhD (catherine.sabiston@utoronto.ca)<sup>b</sup>

11  
12 5 Melissa L. deJonge, MSc (melissa.dejonge@utoronto.ca)<sup>b</sup>

13  
14 6 Skye Barbic, PhD (skye.barbic@ubc.ca)<sup>c,d</sup>

15  
16 7 Nicole Kozloff, MD, SM (nicole.kozloff@camh.ca)<sup>e</sup>

17  
18 8 Emily Nalder, PhD (emily.nalder@utoronto.ca)<sup>a,f</sup>

19  
20  
21  
22 9 <sup>a</sup> Rehabilitation Sciences Institute, University of Toronto (500 University Avenue, Toronto, ON,  
23 Canada, M5G 1V7)

24  
25 11 <sup>b</sup> Faculty of Kinesiology and Physical Education, University of Toronto (55 Harbord Street,  
26 Toronto, ON, Canada, M5S 2W6)

27  
28 13 <sup>c</sup> Department of Occupational Science and Occupational Therapy, University of British  
29 Columbia (T325 - 2211 Wesbrook Mall, Vancouver, BC, Canada, V6T 2B5)

30  
31 15 <sup>d</sup> Foundry (Vancouver, BC, Canada)

32  
33 16 <sup>e</sup> Centre for Addiction and Mental Health (250 College Street, Toronto, ON, Canada, M5T 1R8)

34  
35 17 <sup>f</sup> Department of Occupational Science and Occupational Therapy, University of Toronto (500  
36 University Avenue, Toronto, ON, Canada, M5G 1V7)

37  
38 19 \*Corresponding author: Amy E. Nesbitt, MSc, OT Reg. (Ont.). Rehabilitation Sciences Institute,  
39 University of Toronto, 500 University Avenue, Toronto, ON, Canada, M5G 1V7. Phone: 416-  
40 978-5837. Fax: 416-971-2118. Email: amy.nesbitt@mail.utoronto.ca  
41  
42  
43

44 23 **Keywords:** adolescent, young adult, resilience, mental health, review

45  
46 24 **Word Count:** 4696

47  
48  
49 25

50  
51 26

52  
53 27

## SCOPING REVIEW PROTOCOL

1           **Understanding resilience among transition-age youth with serious mental illness: Protocol**  
2  
3           **for a scoping review**  
4  
5  
6           **Abstract**

7  
8           **Abstract**

9  
10       **Introduction:** Transition-age youth (16-29 years old) are disproportionately affected by the  
11       onset, impact and burden of serious mental illness (SMI; e.g., depression, bipolar disorder,  
12       schizophrenia spectrum disorders). Emerging evidence has increasingly highlighted the concept  
13       of resilience in mental health promotion and treatment approaches for this population. A  
14       comprehensive synthesis of existing evidence is needed to enhance conceptual clarity in this  
15       area, identify knowledge gaps, and inform future research and practice. As such, the present  
16       scoping review is guided by the following questions: How has resilience been conceptualized  
17       and operationalized in the transition-age youth mental health literature? What factors influence  
18       resilience among transition-age youth with SMI, and what outcomes have been studied within  
19       the context of transition-age youth's mental health recovery?  
20  
21  
22

23  
24       **Methods and analysis:** The present protocol will follow six key stages, in accordance with  
25       Arksey and O'Malley's (2005) established scoping review methodology and recent iterations of  
26       this framework, and has been registered with (details removed for anonymous peer review). The  
27       protocol and review process will be carried out by a multidisciplinary team in consultation with  
28       community stakeholders. A comprehensive search strategy will be conducted across multiple  
29       electronic databases to identify relevant empirical literature. Included sources will address the  
30       population of transition-age youth (16-29 years) diagnosed with SMI, the concept of resilience  
31       (in any context), and will report original research written in English. Data screening and  
32       extraction will be completed by at least two independent reviewers. Following meta-narrative  
33  
34  
35  
36  
37  
38  
39  
40  
41  
42  
43  
44  
45  
46  
47  
48  
49  
50  
51  
52  
53  
54  
55  
56  
57  
58  
59  
60

## SCOPING REVIEW PROTOCOL

1 review and qualitative content analyses, findings will be synthesized as a descriptive overview  
2 with tabular and graphical summaries.

3 **Ethics and dissemination:** Institutional research ethics board approval will be obtained prior to  
4 completing the community stakeholder reaction meeting (consultation stage of this review).

5 Results will be disseminated through conference presentations, publications, and user-friendly  
6 reports and graphics.

### 8 **Strengths and limitations of this study**

- 9 • This scoping review study will map various conceptualizations of resilience within the  
10 transition-age youth mental health literature, which may improve conceptual clarity as  
11 well as guide future research, theory, and interventions.
- 12 • Variability in how the population (transition-age youth) and concept (resilience) have  
13 been defined, as well as restrictions to the search strategy based on language, date, and  
14 publication type may limit the breadth of the search.
- 15 • An assessment of the methodological quality of included studies will not be conducted  
16 which limits the types of conclusions and implications that can be drawn from the review.
- 17 • We will apply an iterative and team-based approach, in consultation with community  
18 stakeholders (transition-age youth with SMI, clinicians, researchers) to improve the  
19 applicability and dissemination of results.

## SCOPING REVIEW PROTOCOL

**Introduction**

Transition-age youth (16-29 years old) are the highest risk age group for onset of serious mental illness (SMI; mental illnesses that cause substantial functional impairment, e.g., depression, bipolar disorder, schizophrenia spectrum disorders), the single most disabling group of disorders worldwide (1,2). The experience of mental illness for young people is unique, in that it arises during a critical period of psychosocial development, identity formation, and many complex life transitions (3,4). Access to supportive treatment and relationships, social marginalization, and stigma continue to influence the course and severity of mental illness for transition-age youth (5). Indeed, SMI can negatively impact one's overall physical health, quality of life, and engagement in meaningful life roles and activities, including academics, employment, and social relationships (1,4,6,7). Further, the experience of chronic and persistent symptoms of mental illness can contribute to suicide risk, which is the second leading cause of death among individuals 15-29 years old globally (8,9). Despite the increased risk and burden of SMI among transition-age youth, this age group faces many barriers in accessing service and supports, as they transition out of youth services and into the adult mental health and addiction services sector (10,11). As such, the identification of factors that contribute to transition-age youth's mental health recovery and early intervention are now recognized as priority areas within national and global mental health strategies and guidelines (11–14).

Of particular interest, researchers and clinicians have emphasized the importance of promoting *resilience* in transition-age youth's mental health recovery. Most definitions of resilience refer to positive adaptation in the face of significant adversity as a central or defining feature. However, there are many different ways of conceptualizing resilience (e.g., as a trait, outcome, or dynamic process) (15,16), which has led to some ambiguity in how resilience is

## SCOPING REVIEW PROTOCOL

1 defined and understood across different research disciplines and perspectives (17,18). For  
2 example, many authors have conceptualized and discussed resilience as an outcome resulting  
3 from changes made at the individual level, or in relation to positive personal attributes (e.g.,  
4 hope, self-efficacy, coping) (19,20). This aligns with early definitions of resilience as an  
5 exceptional personal quality or trait, that an individual either has or does not have, which will  
6 determine their capacity to both endure incredibly stressful life events and continue on a path  
7 towards full functional and emotional recovery (15,21,22). Conceptualizations of resilience as a  
8 personal trait or outcome have been criticized in recent research as this does not recognize the  
9 critical role of one's environment and available resources (17,23).

10 In more contemporary and holistic conceptions, "resilience has come to be seen less in  
11 terms of static characteristics within the individual and more as a dynamic and multi-faceted  
12 family of processes that evolve over time" (p. 234) (24). To illustrate, resilience has been  
13 conceptualized as a dynamic process, involving one's personal characteristics, environment, and  
14 support networks, that influence how an individual "bounces back" from challenging  
15 circumstances (e.g., onset of mental illness) (16–18,25). This also acknowledges the integral role  
16 of not only the individual, but the social and ecological systems that influence resilience (26,27).  
17 For example, Wathen and colleagues (2012) offer the following definition further contextualized  
18 to the field of trauma and mental health: "Resilience is a dynamic process in which  
19 psychological, social, environmental and biological factors interact to enable an individual at any  
20 stage of life to develop, maintain, or regain their mental health despite exposure to adversity" (p.  
21 10) (28). Through this lens, resilience is seen as fluid (rather than a fixed or pre-determined  
22 trait), arising through multiple pathways that lead to positive indices of flourishing and  
23 functioning (29). Taken together, processes of resilience are shaped by the complex interplay

## SCOPING REVIEW PROTOCOL

1 between individual experiences of stress / adversity, multimodal “*resilience factors*” (e.g., risks,  
2 internal and external protective factors, self-regulatory strategies), as well as one’s adaptation  
3 and other resilience-related outcomes (25,30).

4 This process-oriented perspective of resilience has gained increased attention in mental  
5 health and rehabilitation sciences research over the past two decades (19,29), and has aligned  
6 with the paradigm shift towards recovery models of mental health and the growing popularity  
7 and application of positive psychology principles in psychiatry (31). Indeed, resilience research  
8 and recovery models of mental health share an orientation towards understanding the processes  
9 that underly individual experiences (embedded within one’s sociocultural context / environment)  
10 and emphasize the importance of hope, meaning, engagement, and life satisfaction in one’s  
11 recovery (32–34). Recent conceptual models (35) and interventions (36,37) focused on youth-  
12 specific and integrated mental health services also highlight resilience as an important aspect to  
13 the recovery process. Additionally, adopting a resilience perspective aligns with more strengths-  
14 based and transdiagnostic approaches which aim to better understand processes of recovery  
15 relevant to a broader range of adolescent and young adult mental health service users (38).  
16 Researchers have begun to uncover resilience factors across and beyond specific diagnoses,  
17 which can be targeted in interventions to promote positive development, functioning, and well-  
18 being (26,29,30,39). As such, the study of resilience among transition-age youth with SMI can  
19 inform developments in recovery-oriented approaches to service delivery and warrants further  
20 exploration.

21 In sum, emerging evidence and frameworks of resilience provide a unique lens to  
22 understanding mental health among transition-age youth, with the capacity to recognize  
23 individuals’ strengths, and move beyond the common focus on illness, deficits and problems in



## SCOPING REVIEW PROTOCOL

1 rehabilitation sciences (35). However, researchers have not yet developed a theoretical  
2 framework or model of resilience tailored to the unique experiences of transition-age youth who  
3 are diagnosed with SMI to guide research and practice (19). In addition, conceptualizations of  
4 resilience vary across the scientific literature, which directly impacts how the concept of  
5 resilience is understood, operationalized and applied within this context. This is important to  
6 address as discrepancies across definitions of resilience may limit measurement, study  
7 comparisons, and current understandings of resiliency-informed care approaches in research and  
8 clinical practice (23). A comprehensive synthesis of existing evidence will enhance conceptual  
9 clarity in this area, identify factors and outcomes that are relevant to transition-age youth's  
10 resilience, and inform future work.

### **Objectives**

12 The overarching purpose of the present scoping review is to synthesize and describe the  
13 breadth of scientific literature on resilience among transition-age youth diagnosed with SMI,  
14 identify current knowledge gaps, and recommend key areas for future resilience research among  
15 this population. Specifically, this scoping review will explore how the concept of resilience has  
16 been conceptualized and operationalized in the transition-age youth mental health literature, and  
17 identify resilience factors and outcomes that have been studied within the context of transition-  
18 age youth's mental health recovery (e.g., adversity, risks, internal and external protective factors,  
19 self-regulatory strategies, adaptation and resilience-related outcomes).

### **Methods and Analysis**

21 A scoping review design was selected based on the exploratory nature of the proposed  
22 research question and the current focus on clarifying the concept of resilience. Particularly, a  
23 scoping review design allows for a comprehensive summary of knowledge, inclusive of more

## SCOPING REVIEW PROTOCOL

1 broad study objectives and methodologies, and is thus recommended for gaining conceptual  
2 clarity and identifying key knowledge gaps (40,41).

3 The scoping review protocol will follow the methodological stages outlined by Arksey  
4 and O'Malley (2005), and extended by Levac and colleagues (2010), including: i) identifying the  
5 research question, ii) identifying relevant studies, iii) study selection, iv) charting the data, v)  
6 collating, summarizing, and reporting the results, and vi) stakeholder consultation (42,43).  
7 Throughout the review process, an iterative and reflexive approach will be used in order to refine  
8 the initial protocol as needed in consultation with a community stakeholder group (involving  
9 researchers, clinicians, and transition-age youth with SMI) (42,43). Recent guidance documents  
10 (44) and best practices for conducting and reporting scoping reviews (PRISMA-ScR) (45) will  
11 also be applied to promote methodological rigor and transparency. The PRISMA-P checklist (46)  
12 can be found in Appendix A. The current protocol has been registered through (details removed  
13 for anonymous peer review).

### 14 **Stage 1: Identifying the Research Question**

15 This scoping review aims to explore the following research questions: (1) What is the  
16 extent and breadth of the current scientific literature on resilience among transition-age youth  
17 diagnosed with SMI? (2) How has resilience been conceptualized and operationalized (i.e.,  
18 defined and measured) in the transition-age youth mental health literature? (3) What factors  
19 influence resilience among transition-age youth with SMI, and what outcomes have been studied  
20 within the context of transition-age youth's mental health recovery? The research questions have  
21 been broadly framed using the PCC mnemonic to address the *population* of transition-age youth  
22 diagnosed with SMI and the *concept* of resilience within any *context* of one's mental health

## SCOPING REVIEW PROTOCOL

1 recovery (41). Each component is further clarified below, in accordance with the Joanna Briggs  
2  
3  
4  
5  
6  
7  
8  
9  
10  
11  
12  
13  
14  
15  
16  
17  
18  
19  
20  
21  
22  
23  
24  
25  
26  
27  
28  
29  
30  
31  
32  
33  
34  
35  
36  
37  
38  
39  
40  
41  
42  
43  
44  
45  
46  
47  
48  
49  
50  
51  
52  
53  
54  
55  
56  
57  
58  
59  
60

1 recovery (41). Each component is further clarified below, in accordance with the Joanna Briggs  
2  
3  
4  
5  
6  
7  
8  
9  
10  
11  
12  
13  
14  
15  
16  
17  
18  
19  
20  
21  
22  
23  
24  
25  
26  
27  
28  
29  
30  
31  
32  
33  
34  
35  
36  
37  
38  
39  
40  
41  
42  
43  
44  
45  
46  
47  
48  
49  
50  
51  
52  
53  
54  
55  
56  
57  
58  
59  
60

2 Institute scoping review manual (44).

3         **Population.** For the present review, the population is defined as “transition-age youth”,  
4 including adolescents and young adults between the ages of 16 and 29 years old, who are  
5 entering adulthood and have been diagnosed with SMI. It is important to note that definitions of  
6 “youth”, “adolescents”, and “young adults” differ across various cultures and settings, and are  
7 thus highly mixed within the scholarly literature. In order to be inclusive of the most common  
8 European/United Nations/WHO definitions of this age group and reflective of current mental  
9 health service models, the present review will include studies with participants spanning middle  
10 adolescence (age 15) to the “upper limit” of young adulthood (age 36) if the target population is  
11 clearly defined as “transition-age youth” (3,14,47–50). Additionally, serious mental illness  
12 (SMI) is defined as “a mental, behavioral, or emotional disorder resulting in serious functional  
13 impairment, which substantially interferes with or limits one or more major life activities”, such  
14 as one’s interpersonal relationships, self-care, employment, or recreation (51,52). Definitions of  
15 SMI exclude dementias, developmental disorders, and substance use disorders, as well as mental  
16 disorders due to a general medical condition (52). Examples of mental health conditions that may  
17 meet criteria for SMI include: major depressive disorders, bipolar disorders, borderline  
18 personality disorder, anxiety disorders, eating disorders and schizophrenia spectrum disorders  
19 (51,52). Among youth and adolescents (under age 18) the same definition and examples are  
20 applied but also occasionally termed “serious emotional disturbance” (SED), rather than SMI  
21 (52,53). Studies with participants experiencing co-morbid disorders which are not the primary  
22 focus will also be included in this scoping review.

## SCOPING REVIEW PROTOCOL

1           **Concept.** While definitions of resilience vary across different research disciplines, most  
2  
3 definitions refer to positive adaptation in the face of significant challenge, risk or adversity as  
4  
5 central or defining features, and acknowledge the importance of sociocultural factors in shaping  
6  
7 experiences and understandings of resilience (19). For the purpose of this scoping review,  
8  
9 resilience is defined as a dynamic process that unfolds over time, involving multiple resilience  
10  
11 factors that interact to enable individuals to negotiate or recover from stressful life events /  
12  
13 adversity (e.g., one's personal characteristics, environment and support networks). Studies that  
14  
15 adopt this process-oriented perspective will be included, and the following core elements of  
16  
17 resilience and resilience factors will be explored: adversity, risks, internal and external protective  
18  
19 factors, self-regulatory strategies, adaptation and resilience-related outcomes (25,30). Studies  
20  
21 that focus solely on a trait perspective of resilience, similar constructs (e.g., ego-resilience,  
22  
23 psychological capital) or biological / genetic / neurophysiological factors will be omitted. Lastly,  
24  
25 given our focus on psychological resilience at the person- or individual-level, studies evaluating  
26  
27 family- or community-level resilience will not be included.

28           **Context.** While “clinical recovery” is often defined as a reduction in SMI symptoms or  
29  
30 impairment (typically in clinical / health care settings), “personal recovery” refers to the  
31  
32 processes that contribute to transition-age youth's hope, development, and engagement in  
33  
34 meaningful activities (even while facing SMI) and emphasizes the importance of multiple  
35  
36 contexts where this occurs (e.g., spanning personal, familial, social and institutional  
37  
38 environments) (35). The present review considers mental health recovery primarily through a  
39  
40 personal recovery lens, and will thus explore transition-age youth's resilience in any context of  
41  
42 their mental health recovery, which may include individual, community, and health-oriented  
43  
44 settings (among others).  
45  
46  
47  
48  
49  
50  
51  
52  
53  
54  
55  
56  
57  
58  
59  
60

## SCOPING REVIEW PROTOCOL

### 1 Stage 2: Identifying Relevant Literature

2 *Information source.* To comprehensively review the existing evidence and knowledge  
3 base related to resilience in the field of transition-age youth mental health, empirical sources will  
4 be considered, including original research / primary studies. Specifically, six electronic databases  
5 of value to the fields of psychology, health and rehabilitation sciences will be searched to  
6 identify relevant empirical studies: MEDLINE (Ovid), EMBASE (Ovid), PsycINFO, AMED,  
7 CINAHL, and Scopus. To enhance the comprehensiveness of the search, relevant journals and  
8 the reference list of included sources will be manually / hand-searched.

9 *Search strategy.* The search terms and search strategy will be developed by the  
10 multidisciplinary review team, in consultation with a health sciences librarian at (details removed  
11 for anonymous peer review). Importantly, keywords have been carefully selected to best capture  
12 the complex and evolving terminology used to describe the population and concept reflected in  
13 our research question. As mentioned, terms to describe the age group of transition-age youth are  
14 highly variable and inconsistent within the literature (e.g., subject headings / keywords may be  
15 inclusive of youth / teenagers / adolescents / emerging adults / adults etc.). Clinical and lay  
16 language to describe SMI diagnoses have also evolved over time, with “severe and persistent  
17 mental illness” and “chronic mental illness” often cited (52). Further, as reflected in the research  
18 aims, there is currently no consensus on the definition of resilience and conceptualizations differ  
19 based on the context or academic discipline applied (19). To overcome these challenges in the  
20 development and execution of our search, we will utilize the following techniques: i) a multi-step  
21 search process to ensure relevant sources are not missed (an initial limited search strategy  
22 favoring sensitivity over precision will be conducted first and inform potential revisions making  
23 the search strategy more precise); ii) use of Yale MeSH analyzer for piloting; and iii) ongoing

## SCOPING REVIEW PROTOCOL

1 expert consultation. Additionally, the search strategy will undergo peer review to enhance its  
2 feasibility and rigor (e.g., CADTH Peer Review Checklist for Search Strategies) (54).

3 The preliminary search strategy and list of keywords have been developed using  
4 MEDLINE (Ovid) (see Appendix B) and will be adapted to each database once finalized. The  
5 search strategy will explore specified search terms within subject headings, titles, abstracts and  
6 keywords. Search terms will be combined using appropriate Boolean logic and operators (e.g.,  
7 ‘and’, ‘or’, ‘not’).

### 8 **Stage 3: Study Selection**

9 Study selection will follow a collaborative and iterative screening process among the  
10 review team using Covidence systematic review software (55) and pre-determined eligibility  
11 criteria (42,43). All search results will be exported to Covidence for data management and to  
12 remove duplicates. At least two independent reviewers (authors AN and MD) will complete  
13 screening in two stages for i) title/abstract and ii) full-text review. The reviewers will complete a  
14 calibration exercise using a sample of 10 references to pilot inclusion / exclusion criteria and  
15 compare decisions (e.g., include / exclude / uncertain). Formal title/abstract screening will  
16 commence when 80% agreement is achieved and will involve regular meetings among reviewers  
17 to discuss any challenges or uncertainties. Upon completion of stage 1, full-text references will  
18 be obtained and independently screened by the same two reviewers. The same strategy will be  
19 applied to stage 2 full-text screening, including piloting (calibration exercise for 10 references)  
20 and regular discussion. At each stage, reviewer (inter-rater) agreement will be reported.  
21 Disagreements will be resolved by consensus or by the decision of a third reviewer (senior  
22 authors EN and CS).

## SCOPING REVIEW PROTOCOL

1 Included sources will address the population of transition-age youth diagnosed with SMI,  
2 the concept of resilience (in any context), and will contain original peer reviewed research  
3 written in English. Specific language restrictions were made for feasibility purposes.

4 Additionally, the publishing date was limited to the years 2000 to 2022 as this is the time period  
5 where a significant rise in resilience research emerged within mental health and rehabilitation  
6 sciences (19,29,56). The prioritisation, implementation and evaluation of mental health services  
7 specifically tailored to transition-age youth (e.g., early intervention programs) also mainly took  
8 root after the year 2000 (13,47,57). Further inclusion / exclusion criteria for the two-stage  
9 screening are detailed below.

### ***Eligibility for Stage 1 Title/Abstract Review:***

11 ***Inclusion criteria.*** a) Population: Refers to transition-age youth diagnosed or living with  
12 SMI (as defined previously). b) Concept: Resilience / resiliency is identified as a key focus  
13 within the purpose / objectives / research question, outcome measure, and/or findings. c)  
14 Context: Is set in any individual, community or health-oriented context of mental health  
15 recovery. d) Type of source: Peer reviewed original research (quantitative, qualitative, mixed  
16 method). e) Publication language / date: Written in English and published between 2000 and  
17 2022.

18 ***Exclusion criteria.*** a) Population: Refers to non-clinical population, general population,  
19 children / youth (age 0-14), or childhood developmental disorder. b) Concept: Resilience /  
20 resiliency is not an explicit focus. c) Type of source: Peer reviewed articles with the primary aim  
21 of developing, reporting or validating the psychometric properties of survey measures /  
22 instruments, study protocols, review articles (e.g., systematic/scoping reviews, meta-analyses),  
23 books / book chapters, and grey literature (e.g., editorials, commentaries / reports, clinical

## SCOPING REVIEW PROTOCOL

1 guidelines, conference proceedings, and theses / dissertations). d) Publication language / date:  
2  
3  
4  
5  
6  
7  
8  
9  
10  
11  
12  
13  
14  
15  
16  
17  
18  
19  
20  
21  
22  
23  
24  
25  
26  
27  
28  
29  
30  
31  
32  
33  
34  
35  
36  
37  
38  
39  
40  
41  
42  
43  
44  
45  
46  
47  
48  
49  
50  
51  
52  
53  
54  
55  
56  
57  
58  
59  
60

### ***Eligibility for Stage 2 Full-text Review:***

4 ***Inclusion criteria.*** a) Population: Clearly defined clinical population in accordance with  
5 either: participant self-reported history of SMI; clinician confirmed diagnosis of SMI; or DSM-V  
6 / ICD-10 system diagnostic criteria. b) Concept: Must explicitly define / operationalize the  
7 concept of resilience from a process-oriented perspective and focus on individual-level  
8 resilience.

9 ***Exclusion criteria.*** a) Population: Mixed samples whereby transition-age youth with SMI  
10 are encompassed within broader age groups or the general population (without the stratification  
11 of results / reporting). b) Concept: Trait resilience, other psychological constructs that are similar  
12 or connected to resilience / resiliency (e.g., psychological capital, hardiness, grit, general indices  
13 of subjective well-being), family- or community-level resilience, or biological / genetic /  
14 neurophysiological factors are identified as the sole / primary focus or outcome.

15 While criteria were developed to maintain a broad scope of selected studies, our hope is  
16 that stringent inclusion / exclusion criteria will eliminate sources that only include the concept of  
17 resilience as an opinion, recommendation, vague interpretation, or buzzword – as this will not  
18 aid in enhancing conceptual clarity in this research area. As such, these broad eligibility criteria  
19 may undergo further refinement to ensure that selected sources capture the full breadth of  
20 knowledge available related to resilience among young people with SMI.

### **Stage 4: Data Extraction**

21  
22 Following recommended data charting methods (42,43), a standardized and systematic  
23 charting form (Table 1) will be used to organize and interpret relevant details from the selected



## SCOPING REVIEW PROTOCOL

1 sources in line with our research question and objectives. The following information will be  
2  
3 charted in Excel: i) general document details, ii) key characteristics of empirical studies (e.g.,  
4  
5 research design, methods, intervention details, youth engagement, intersectional approaches,  
6  
7 study population, context), iii) how resilience was conceptualized and operationalized (e.g.,  
8  
9 definition, theoretical framework / model, academic discipline, measures), and iv) resilience  
10  
11 factors and outcomes identified.  
12  
13  
14  
15  
16

17         The preliminary chart form was also developed in accordance with Greenhalgh and  
18  
19 colleagues' (2005) meta-narrative approach (58). Specifically, this meta-narrative approach was  
20  
21 originally created to detail how a field of study or key concept has evolved over time and to  
22  
23 explore potential tensions that exist across research traditions (or "paradigms") within  
24  
25 knowledge syntheses (58). A meta-narrative approach is recommended when examining  
26  
27 complex, heterogeneous bodies of literature where a key concept of interest has been  
28  
29 conceptualized and investigated through different research traditions, and conceptual clarity is  
30  
31 needed (58). According to Greenhalgh et al. (2005), a *research tradition* refers to a paradigm of  
32  
33 inquiry, undertaken by researchers, that shares four key interrelated dimensions (conceptual,  
34  
35 theoretical, methodological, instrumental), and thus shows distinct disciplinary roots, scope and  
36  
37 key concepts (58). Research traditions are often characterized and influenced by seminal  
38  
39 conceptual papers that inform the direction and focus of future work (58). Alternatively, an  
40  
41 *academic discipline* is defined as a broader field of study or branch of knowledge (e.g.,  
42  
43 sociology, psychology, medicine) (58).  
44  
45  
46  
47  
48

49         Data extraction will be a collaborative and iterative process among the review team to  
50  
51 ensure that key characteristics, definitions, themes and strengths/limitations are captured. A  
52  
53 calibration exercise using a sample of 5 studies will be completed by two reviewers to pilot the  
54  
55  
56  
57  
58  
59  
60

## SCOPING REVIEW PROTOCOL

1 chart form. When agreement of at least 80% is achieved, the two independent reviewers (authors  
 2 AN and MD) will complete the remaining formal data charting procedures for all references. The  
 3 charting form will be revised as needed based on stakeholder feedback. Consensus will be  
 4 reached through discussion or final decision by a third reviewer (senior authors EN and CS) if  
 5 necessary. Any challenges in the organization / categorization of data at this stage will be  
 6 brought to the four content experts on this protocol (CS, SB, NK, EN), each of whom have over  
 7 10 years of research and/or clinical experience in young adult mental health and resiliency.

8 *Table 1. Draft charting form*

|                                                        |                                                                                                                                                                                                 |
|--------------------------------------------------------|-------------------------------------------------------------------------------------------------------------------------------------------------------------------------------------------------|
| General document details                               |                                                                                                                                                                                                 |
| APA citation                                           | Full author, date and journal details.                                                                                                                                                          |
| Country and location                                   | Country of publication (and location if provided).                                                                                                                                              |
| Study characteristics                                  |                                                                                                                                                                                                 |
| Study purpose                                          | Purpose, research question(s), aim(s), and/or objective(s) of the study.                                                                                                                        |
| Study population and sample size                       | Age range, SMI diagnosis, relevant demographic characteristics. Number of participants.                                                                                                         |
| Study design and methods                               | Quantitative, qualitative, or mixed methods. Main experimental, observational or qualitative methods used.                                                                                      |
|                                                        | Intervention (if applicable): Description of key characteristics (e.g., intervention purpose / target, type, main components, duration)                                                         |
|                                                        | Youth engagement (if applicable): Extent to which youth with SMI were engaged through aspects of the research process.                                                                          |
|                                                        | Intersectional approaches (if applicable): Description of recruitment procedures, theoretical frameworks, and analyses addressing diversity and intersecting social identities of participants. |
| Context                                                | The setting of the research if provided (e.g., community, health-oriented, specific treatment / program).                                                                                       |
| Conceptualization and operationalization of resilience |                                                                                                                                                                                                 |
| Conceptualization                                      | How was resilience described from a process-oriented perspective?                                                                                                                               |
| Definition of resilience                               | Definition or operationalization of resilience.                                                                                                                                                 |
| Theoretical framework/model                            | Theory, conceptual model(s) or framework(s) applied.                                                                                                                                            |
| Seminal papers referenced                              | Overarching paradigm and seminal conceptual papers that have informed the research (if applicable).                                                                                             |
| Instruments used to measure resilience                 | Specific measures / surveys employed (if applicable).                                                                                                                                           |

## SCOPING REVIEW PROTOCOL

|                                        |                                                                                                                                           |
|----------------------------------------|-------------------------------------------------------------------------------------------------------------------------------------------|
| Academic discipline                    | Broad field of research or practice.                                                                                                      |
| Resilience factors and outcomes        |                                                                                                                                           |
| Adversity / risks                      | Personal or environmental risk factors identified (if applicable).                                                                        |
| Internal / external protective factors | Personal or environmental protective factors identified (if applicable).                                                                  |
| Self-regulatory strategies             | Strategies identified to self-manage mood, emotions, thoughts, and/or behaviors (if applicable).                                          |
| Study outcomes                         | Any outcomes that were measured or described. Description of positive change, resilience-related outcomes, or adaptation (if applicable). |
| Important results                      | Description of main findings and implications.                                                                                            |

**Stage 5: Collating, Summarizing, and Reporting the Results**

The PRISMA-ScR Checklist will guide the presentation of results in the final report (45). This will include a flow diagram to explicitly detail review decision making processes (45). Data from eligible full-texts will be analyzed and collated using meta-narrative and qualitative content analyses as well as descriptive statistics (e.g., frequencies / counts). Results of this scoping review will be summarized narratively in a descriptive overview (42,43).

Qualitative content analysis will be used to identify, analyze, and report patterns across the included empirical sources to understand how resilience has been conceptualized and operationalized among transition-age youth with SMI. Particularly, definitions, measures, resilience factors and outcomes will be open-coded, and then grouped to generate distinct categories. Aspects of the study population and context of mental health recovery may also be analyzed. The inductive and reflexive coding process will be completed by two reviewers (authors AN and MD) using Nvivo software. Categories will then be reviewed and discussed with all members of the multidisciplinary review team (CS, SB, NK, EN) for further refinement. As guided by Greenhalgh et al. (2005) for meta-narrative review, findings will be organized and synthesized to map conceptualizations of resilience over time and across different research

## SCOPING REVIEW PROTOCOL

1 traditions (58). Research traditions will be identified through a process of grouping articles that  
2 reflect similar theoretical, methodological and/or instrumental approaches (e.g., seminal papers  
3 cited, how the authors' frame the concept of resilience within the study outcomes or  
4 implications). This will allow for easier interpretation of the extent and breadth of the current  
5 literature on resilience among transition-age youth diagnosed with SMI. Particularly,  
6 comparisons and tensions across definitions of resilience may be highlighted according to each  
7 paradigm.

8       Reflexivity will support methodological rigor and transparency by explicitly  
9 acknowledging how the researchers' positionality may influence the motivations and  
10 methodological choices that ultimately shape the review process, interpretations, and results (59–  
11 61). Ongoing reflexive practice will be used to address and challenge researcher biases,  
12 assumptions, and preunderstandings that may influence study decisions and analyses, and to  
13 critically analyze positions of privilege and power in research activities. Detailed notes of our  
14 decision-making processes and justifications will be documented throughout all stages of the  
15 scoping review.

16       For the purpose of the present scoping review, we will use a combination of narrative,  
17 tabular, and graphical summaries to present key findings (42,43). A traditional summary chart  
18 will describe key characteristics of each included source (e.g., author and year of publication,  
19 research tradition, academic discipline, study design, study population, definitions of resilience,  
20 measures, main findings). Resilience factors and outcomes will be summarized in a table or  
21 figure. A creative graphical / visual depiction of identified research traditions and timeframe will  
22 also be used to “map” key findings of the review (58). In sum, the analytic approach has been  
23 developed to facilitate conceptual / theoretical advancements in resilience research, identify key

## SCOPING REVIEW PROTOCOL

1 knowledge gaps, and highlight potential future directions in the study of transition-age youth  
2 resilience and mental health. The presentation and reporting of results (through summaries,  
3 tables, and visuals) will be discussed among the multidisciplinary review team and community  
4 stakeholder group. Consistent input from the perspective of researchers, clinicians, and  
5 transition-age youth with SMI will enhance the relevance and utility of the review findings.

### **Stage 6: Stakeholder Consultation**

7 The overarching goal of the current scoping review is to systematically explore the  
8 current extent and breadth of peer reviewed research on resilience among transition-age youth  
9 diagnosed with SMI. Particularly, efforts have been made within the scoping review  
10 methodology to provide a holistic and coherent overview of evidence that can inform future  
11 research, education, and practice (41–43). In order to achieve these goals, the multidisciplinary  
12 review team has been formed to include knowledgeable stakeholders (researchers, clinicians,  
13 knowledge users) with backgrounds in psychiatry / early intervention services (NK),  
14 occupational therapy / resiliency in rehabilitation sciences (AN, SB, EN), and kinesiology /  
15 young adult mental health programming (MD, CS).

16 Following Levac and colleagues' (2010) recommendations, this scoping review will also  
17 consult with community stakeholders to gain the perspectives of transition-age youth with lived  
18 experience of SMI, clinicians, and other mental health / resiliency researchers (43). Community  
19 stakeholders will be invited through the review team's current research / practice networks and  
20 established partnerships with youth-focused mental health services in Canada. Consultative  
21 meetings will be held at two time points to inform: i) the research question and methods (topic  
22 consultation meeting), and ii) interpretation, reporting and knowledge translation strategies  
23 (reaction meeting) (62).

## SCOPING REVIEW PROTOCOL

1           At the time of the “reaction meeting”, up to three focus groups will be conducted as a  
2  
3  
4  
5           2 more formal consultation among the community stakeholders and the review team. Those who  
6  
7  
8           3 consent to participate will be asked about their impression of key review findings (e.g., how  
9  
10           4 resilience has been defined), whether this resonates with them/their experiences, where  
11  
12           5 gaps/tensions exist that require further investigation, and how this knowledge can be applied to  
13  
14           6 support mental health recovery. This will shape how results are presented and interpreted in the  
15  
16           7 final scoping review paper and guide decision making on knowledge dissemination strategies.  
17  
18           8 We will aim for equal representation among the researchers, clinicians, and young people  
19  
20           9 involved. Focus groups will be carried out either in-person or virtually using a semi-structured  
21  
22           10 interview guide. Audio recordings will be transcribed verbatim to complete thematic analysis.  
23  
24           11 Complete methods and results will be detailed in the final report (including stakeholder group  
25  
26           12 characteristics, sample size, data collection tools, analysis, and findings) (43).

27  
28           13           Guided by scoping review practices, stakeholder engagement will promote a more  
29  
30           14 collaborative approach, emphasize the voices of young people and knowledge users, and  
31  
32           15 ultimately maximize the potential contribution of the research (43). Particularly, involving  
33  
34           16 transition-age youth with SMI throughout the review process will facilitate feedback on the  
35  
36           17 relevance and usefulness of the review findings. This is considered essential for not only  
37  
38           18 advancing research and practice in youth mental health, but also addressing recent concerns of  
39  
40           19 the “weaponization” of resiliency in rehabilitation (e.g., adding stress, pressure, or individual  
41  
42           20 onus to “become resilient” at times of increased vulnerability) by drawing on the values and  
43  
44           21 perspectives of young people (63–65).  
45  
46  
47  
48  
49  
50  
51  
52  
53  
54  
55  
56  
57  
58  
59  
60

## SCOPING REVIEW PROTOCOL

### 1 **Patient and Public Involvement**

2 Patients and members of the public have not been involved in the design of this scoping  
3 review and the protocol development. However, the perspectives of transition-age youth who  
4 have experienced SMI will be gathered throughout the review process. Their feedback will  
5 inform our methods, interpretation of results, and knowledge dissemination plan.

### 6 **Ethics and Dissemination**

7 Institutional research ethics board approval will be received prior to the completion of the  
8 community stakeholder reaction meeting (stage 6). Results of the review will be disseminated  
9 through traditional approaches, including open-access peer-reviewed publication(s),  
10 presentations at 1-2 national/international conferences, and a plain-language summary report.  
11 Additional knowledge translation strategies may be used dependent on community stakeholder  
12 feedback to share findings, key messages and future directions (e.g., infographics, social media).

### 13 **Conclusion**

14 The distinct impact and burden of SMI among young people has been increasingly  
15 recognized among researchers and clinicians. This has provoked new research and care  
16 approaches centered on building resiliency. Despite a recent surge in examinations of resilience  
17 in the context of transition-age youth mental health recovery, there remains a lack of  
18 understanding on the core meanings, processes and outcomes of resilience among this  
19 population. To our knowledge, this will be the first scoping review to systematically examine  
20 how resilience is conceptualized and operationalized among transition-age youth with SMI, and  
21 explore what resilience factors and outcomes have been studied. A comprehensive synthesis,  
22 developed in collaboration with community stakeholders, is needed to advance research and  
23 clinical practice.

## SCOPING REVIEW PROTOCOL

- 1 **Contributorship Statement:** AN led the conceptualization of this review and drafted the  
2  
3  
4  
5  
6  
7  
8  
9  
10  
11  
12  
13  
14  
15  
16  
17  
18  
19  
20  
21  
22  
23  
24  
25  
26  
27  
28  
29  
30  
31  
32  
33  
34  
35  
36  
37  
38  
39  
40  
41  
42  
43  
44  
45  
46  
47  
48  
49  
50  
51  
52  
53  
54  
55  
56  
57  
58  
59  
60
- 1 **Contributorship Statement:** AN led the conceptualization of this review and drafted the  
2 protocol manuscript with support from CS, MD, SB, NK, and EN. MD was involved in the  
3 review design and refining the search strategy. CS, SB, NK, and EN were also involved in the  
4 review design, and the development of the eligibility criteria and data extraction forms. All  
5 authors provided feedback on the manuscript and approval for submitting this protocol  
6 manuscript for publication.
- 7 **Competing Interests:** None declared. There are no competing interests for any author.
- 8 **Funding:** This research received no specific grant from any funding agency in the public,  
9 commercial or not-for-profit sectors.
- 10 **Data Sharing Statement:** No data are associated with this article.
- 11 **Patient Consent:** Not required.
- 12 **License Statement:** I, the Submitting Author has the right to grant and does grant on behalf of  
13 all authors of the Work (as defined in the below author licence), an exclusive licence and/or a  
14 non-exclusive licence for contributions from authors who are: i) UK Crown employees; ii) where  
15 BMJ has agreed a CC-BY licence shall apply, and/or iii) in accordance with the terms applicable  
16 for US Federal Government officers or employees acting as part of their official duties; on a  
17 worldwide, perpetual, irrevocable, royalty-free basis to BMJ Publishing Group Ltd (“BMJ”) its  
18 licensees and where the relevant Journal is co-owned by BMJ to the co-owners of the Journal, to  
19 publish the Work in BMJ Open and any other BMJ products and to exploit all rights, as set out in  
20 our licence.
- 21 **Acknowledgements:** We would like to acknowledge Julia Martyniuk, Health Sciences Librarian  
22 (University of Toronto), for their expertise and assistance in developing the search strategy for  
23 this scoping review.



## SCOPING REVIEW PROTOCOL

**References**

1. McGorry P. Transition to adulthood: The critical period for pre-emptive, disease-modifying care for schizophrenia and related disorders. *Schizophr Bull.* 2011;37(3):524–30. <https://doi.org/10.1093/schbul/sbr027>
2. Pearson C, Janz T, Ali J. Mental and substance use disorders in Canada. *Health at a Glance.* Statistics Canada. Catalogue no. 82-624-X. 2013. [http://www5.statcan.gc.ca/olc-olc.action?objId=82-624-X201300111855&objType=47&lang=en&limit=0](http://www5.statcan.gc.ca/olc-olc/olc.action?objId=82-624-X201300111855&objType=47&lang=en&limit=0)
3. Arnett JJ, Žukauskienė R, Sugimura K. The new life stage of emerging adulthood at ages 18–29 years: Implications for mental health. *The Lancet Psychiatry.* 2014;1(7):569–76. [https://doi.org/10.1016/S2215-0366\(14\)00080-7](https://doi.org/10.1016/S2215-0366(14)00080-7)
4. Yung AR, Cotter J, McGorry PD. *Youth Mental Health: Approaches to Emerging Mental Ill-Health in Young People.* Routledge; 2020.
5. Rehm J, Shield KD. Global burden of disease and the impact of mental and addictive disorders. *Curr Psychiatry Rep.* 2019;21(2):1-7. <https://doi.org/10.1007/s11920-019-0997-0>
6. Fusar-Poli P. Integrated mental health services for the developmental period (0 to 25 Years): A critical review of the evidence. *Front Psychiatry.* 2019;10:355. <https://doi.org/10.3389/fpsy.2019.00355>
7. Stoep AV, Beresford SA, Weiss NS, McKnight B, Cauce AM, Cohen P. Community-based study of the transition to adulthood for adolescents with psychiatric disorder. *Am J Epidemiol.* 2000;152(4):352–62. <https://doi.org/10.1093/aje/152.4.352>
8. Lozano R, Naghavi M, Foreman K, Lim S, Shibuya K, Aboyans V, et al. Global and regional mortality from 235 causes of death for 20 age groups in 1990 and 2010: A

## SCOPING REVIEW PROTOCOL

- 1  
2  
3 1 systematic analysis for the Global Burden of Disease Study 2010. *Lancet*.  
4  
5 2012;380(9859):2095–2128. [https://doi.org/10.1016/S0140-6736\(12\)61728-0](https://doi.org/10.1016/S0140-6736(12)61728-0)  
6  
7  
8 9. World Health Organization. Mental health and substance use: Suicide data. 2019.  
9  
10 4 Available from: [https://www.who.int/teams/mental-health-and-substance-use/data-](https://www.who.int/teams/mental-health-and-substance-use/data-research/suicide-data)  
11  
12 research/suicide-data  
13  
14  
15 6 10. Burgess PM, Pirkis JE, Slade TN, Johnston AK, Meadows GN, Gunn JM. Service use for  
16  
17 7 mental health problems: Findings from the 2007 National Survey of Mental Health and  
18  
19 8 Wellbeing. *Aust New Zeal J Psychiatry*. 2009;43(7):615–23.  
20  
21  
22 9 <https://doi.org/10.1080/00048670902970858>  
23  
24 10 11. Mental Health Commission of Canada. Changing directions, changing lives: The mental  
25  
26 11 health strategy for Canada. 2012. Available from:  
27  
28 12 <https://www.mentalhealthcommission.ca>  
29  
30  
31 13 12. Ministry of Health and Long-Term Care. Respect, recovery, resilience: Recommendations  
32  
33 14 for Ontario’s mental health & addictions strategy. 2011. Available from:  
34  
35 15 <http://www.health.gov.on.ca>  
36  
37  
38 16 13. World Health Organization. Mental health action plan 2013-2020. 2013. Available from:  
39  
40 17 <https://apps.who.int/iris/handle/10665/89966>  
41  
42  
43 18 14. World Health Organization. Guidelines on mental health promotive and preventive  
44  
45 19 interventions for adolescents: Helping adolescents thrive. 2020. Available from:  
46  
47 20 [https://www.who.int/publications/i/item/guidelines-on-mental-health-promotive-and-](https://www.who.int/publications/i/item/guidelines-on-mental-health-promotive-and-preventive-interventions-for-adolescents)  
48  
49 21 preventive-interventions-for-adolescents  
50  
51  
52 22 15. Fine SB. Resilience and human adaptability: Who rises above adversity? *Am J Occup*  
53  
54 23 *Ther*. 1991;45(6):493–503. <https://doi.org/10.5014/ajot.45.6.493>  
55  
56  
57  
58  
59  
60

## SCOPING REVIEW PROTOCOL

- 1 16. Masten AS. Ordinary magic: Resilience processes in development. *Am Psychol*.  
2  
3  
4  
5 2001;56(3):227–38. <http://doi.org/10.1037//0003-066x.56.3.227>  
6
- 7 17. Luthar SS, Cicchetti D, Becker B. The construct of resilience: A critical evaluation and  
8  
9  
10  
11  
12  
13 4 guidelines for future work. *Child Dev*. 2000;71(3):543–62. <https://doi.org/10.1111/1467-8624.00164>  
14
- 15 18. Ungar M. *The social ecology of resilience: A handbook of theory and practice*. Springer  
16  
17  
18 Science & Business Media; 2011.
- 19 19. Fletcher D, Sarkar M. Psychological resilience: A review and critique of definitions,  
20  
21  
22 8 concepts, and theory. *Eur Psychol*. 2013;18(1):12–23. <https://doi.org/10.1027/1016-9040/a000124>  
23  
24  
25
- 26 20. Gillespie BM, Chaboyer W, Wallis M. Development of a theoretically derived model of  
27  
28  
29  
30  
31  
32 11 resilience through concept analysis. *Contemp Nurse*. 2007;25(1–2):124–135.  
33  
34  
35  
36  
37  
38  
39  
40  
41  
42  
43  
44  
45  
46  
47  
48  
49  
50  
51  
52  
53  
54  
55  
56  
57  
58  
59  
60  
23 25. Nalder E, Hartman L, Hunt A, King G. Traumatic brain injury resiliency model: A

## SCOPING REVIEW PROTOCOL

- 1 conceptual model to guide rehabilitation research and practice. *Disabil Rehabil.*  
2  
3 1 2019;41(22):2708–2717. <https://doi.org/10.1080/09638288.2018.1474495>  
4  
5 2  
6  
7 26. Masten AS, Lucke CM, Nelson KM, Stallworthy IC. Resilience in development and  
8  
9  
10 4 psychopathology: Multisystem perspectives. *Annu Rev Clin Psychol.* 2021;17(1):521–  
11  
12 5 549. <https://doi.org/10.1146/annurev-clinpsy-081219-120307>  
13  
14 27. Ungar M, Theron L. Resilience and mental health: How multisystemic processes  
15 6 contribute to positive outcomes. *The Lancet Psychiatry.* 2020;7(5):441–448.  
16  
17 7 [https://doi.org/10.1016/S2215-0366\(19\)30434-1](https://doi.org/10.1016/S2215-0366(19)30434-1)  
18  
19 8  
20 28. Wathen CN, MacGregor JC, Hammerton J, Coben JH, Herrman H, Stewart DE, et al.  
21 9  
22 10 Priorities for research in child maltreatment, intimate partner violence and resilience to  
23  
24 11 violence exposures: Results of an international Delphi consensus development process.  
25  
26 12 *BMC Public Health.* 2012;12(1):684. <https://doi.org/10.1186/1471-2458-12-684>  
27  
28  
29 13 29. Stainton A, Chisholm K, Kaiser N, Rosen M, Upthegrove R, Ruhrmann S, et al.  
30  
31 14 Resilience as a multimodal dynamic process. *Early Interv Psychiatry.* 2019;13(4):725–  
32  
33 15 732. <https://doi.org/10.1111/eip.12726>  
34  
35 16 30. Davydov DM, Stewart R, Ritchie K, Chaudieu I. Resilience and mental health. *Clin*  
36  
37 17 *Psychol Rev.* 2010;30(5):479–495. <https://doi.org/10.1016/j.cpr.2010.03.003>  
38  
39 18 31. Schrank B, Brownell T, Tylee A, Slade M. Positive psychology: An approach to  
40  
41 19 supporting recovery in mental illness. *East Asian Arch Psychiatry.* 2014;24(3):95–103.  
42  
43 20 32. Echezarraga A, Las Hayas C, López de Arroyabe E, Jones SH. Resilience and recovery in  
44  
45 21 the context of psychological disorders. *J Humanist Psychol.* 2019;002216781985162.  
46  
47 22 <https://doi.org/10.1177/0022167819851623>  
48  
49 23 33. Friesen BJ. Recovery and resilience in children’s mental health: Views from the field.  
50  
51  
52  
53  
54  
55  
56  
57  
58  
59  
60

## SCOPING REVIEW PROTOCOL

- 1  
2  
3 1 Psychiatr Rehabil J. 2007;31(1):38–48. <https://doi.org/10.2975/31.1.2007.38.48>
- 4  
5 2 34. Jacob KS. Recovery model of mental illness: A complementary approach to psychiatric  
6  
7 care. Indian J Psychol Med. 2015;37(2):117–119. <https://doi.org/10.4103/0253->  
8  
9 7176.155605
- 10  
11 4  
12 5 35. Rayner S, Thielking M, Lough R. A new paradigm of youth recovery: Implications for  
13  
14 youth mental health service provision. Aust J Psychol. 2018;70(4):330–340.  
15  
16 <https://doi.org/10.1111/ajpy.12206>
- 17  
18 7  
19 8 36. Meyer PS, Gottlieb JD, Penn D, Mueser K, Gingerich S. Individual Resiliency training:  
20  
21 An early intervention approach to enhance well-being in people with first-episode  
22  
23 psychosis. Psychiatr Ann. 2015;45(11):554–560. <https://doi.org/10.3928/00485713->  
24  
25 20151103-06
- 26  
27 11  
28 12 37. Oliver KG, Collin P, Burns J, Nicholas J. Building resilience in young people through  
29  
30 meaningful participation. Aust e-Journal Adv Ment Heal. 2006;5(1):34–40.  
31  
32 <https://doi.org/10.5172/jamh.5.1.34>
- 33  
34 14  
35 15 38. Fusar-Poli P, Solmi M, Brondino N, Davies C, Chae C, Politi P, et al. Transdiagnostic  
36  
37 psychiatry: A systematic review. World Psychiatry. 2019;18(2):192–207.  
38  
39 <https://doi.org/10.1002/wps.20631>
- 40  
41 17  
42 18 39. Fritz J, de Graaff AM, Caisley H, van Harmelen A-L, Wilkinson PO. A systematic review  
43  
44 of amenable resilience factors that moderate and/or mediate the relationship between  
45  
46 childhood adversity and mental health in young people. Front Psychiatry. 2018;9:230.  
47  
48 <https://doi.org/10.3389/fpsy.2018.00230>
- 49  
50 21  
51 22 40. Colquhoun HL, Levac D, O'Brien KK, Straus S, Tricco AC, Perrier L, et al. Scoping  
52  
53 reviews: Time for clarity in definition, methods, and reporting. J Clin Epidemiol.  
54  
55 23

## SCOPING REVIEW PROTOCOL

- 1  
2  
3 1 2014;67(12):1291–1294. <https://doi.org/10.1016/j.jclinepi.2014.03.013>  
4  
5  
6 2 41. Munn Z, Peters MDJ, Stern C, Tufanaru C, McArthur A, Aromataris E. Systematic review  
7  
8 3 or scoping review? Guidance for authors when choosing between a systematic or scoping  
9  
10 4 review approach. *BMC Med Res Methodol*. 2018;18(1):143.  
11  
12 5 <https://doi.org/10.1186/s12874-018-0611-x>  
13  
14  
15 6 42. Arksey H, O'Malley L. Scoping studies: Towards a methodological framework. *Int J Soc*  
16  
17 7 *Res Methodol*. 2005;8(1):19–32. <https://doi.org/10.1080/1364557032000119616>  
18  
19 8 43. Levac D, Colquhoun H, O'Brien KK. Scoping studies: Advancing the methodology.  
20  
21 9 *Implement Sci*. 2010;5(1):69. <https://doi.org/10.1186/1748-5908-5-69>  
22  
23  
24 10 44. Peters MDJ, Marnie C, Tricco AC, Pollock D, Munn Z, Alexander L, et al. Updated  
25  
26 11 methodological guidance for the conduct of scoping reviews. *JBIEvid Synth*.  
27  
28 12 2020;18(10):2119–2126. <http://doi.org/10.11124/JBIES-20-00167>  
29  
30  
31 13 45. Tricco AC, Lillie E, Zarin W, O'Brien KK, Colquhoun H, Levac D, et al. PRISMA  
32  
33 14 extension for scoping reviews (PRISMA-ScR): Checklist and explanation. *Ann Intern*  
34  
35 15 *Med*. 2018;169(7):467–473. <https://doi.org/10.7326/M18-0850>  
36  
37  
38 16 46. Moher D, Shamseer L, Clarke M, Ghersi D, Liberati A, Petticrew M, et al. Preferred  
39  
40 17 reporting items for systematic review and meta-analysis protocols (PRISMA-P) 2015  
41  
42 18 statement. *Syst Rev*. 2015;4(1):1-9. <https://doi.org/10.1186/2046-4053-4-1>  
43  
44  
45 19 47. McGorry P, Bates T, Birchwood M. Designing youth mental health services for the 21st  
46  
47 20 century: Examples from Australia, Ireland and the UK. *Br J Psychiatry*.  
48  
49 21 2013;202(s54):s30–s35. . <https://doi.org/10.1192/bjp.bp.112.119214>  
50  
51  
52 22 48. Mueser KT, Penn DL, Addington J, Brunette MF, Gingerich S, Glynn SM, et al. The  
53  
54 23 NAVIGATE program for first-episode psychosis: Rationale, overview, and description of

## SCOPING REVIEW PROTOCOL

- 1  
2  
3 1 psychosocial components. *Psychiatr Serv.* 2015;66(7):680–690.  
4  
5 2 <https://doi.org/10.1176/appi.ps.201400413>  
6  
7  
8 3 49. Perovic B. Defining youth in contemporary national legal and policy framework across  
9  
10 4 Europe. Partnership between the European Commission and the Council of Europe in the  
11  
12 5 field of youth. 2016. Available from: <https://pjp-eu.coe.int/en/web/youth->  
13  
14 6 [partnership/youth-knowledge-and-policy](https://pjp-eu.coe.int/en/web/youth-partnership/youth-knowledge-and-policy)  
15  
16  
17 7 50. United Nations. Definition of youth. 2013. Available from: <http://www.un.org/>  
18  
19 8 [esa/socdev/documents/youth/fact-sheets/youth-definition.pdf](http://www.un.org/esa/socdev/documents/youth/fact-sheets/youth-definition.pdf).  
20  
21  
22 9 51. National Institute of Mental Health. Mental illness. 2021. Available from:  
23  
24 10 <https://www.nimh.nih.gov/health/statistics/mental->  
25  
26 11 [illness.shtml#:~:text=Serious%20mental%20illness%20\(SMI\)%20is,or%20more%20major%20life%20activities](https://www.nimh.nih.gov/health/statistics/mental-illness.shtml#:~:text=Serious%20mental%20illness%20(SMI)%20is,or%20more%20major%20life%20activities).  
27  
28  
29 12  
30  
31 13 52. Substance Abuse and Mental Health Services Administration. Behind the term: Serious  
32  
33 14 mental illness. Development Services Group, Inc. 2016. Available from:  
34  
35 15 <https://www.hsdn.org/?abstract&did=801613>  
36  
37  
38 16 53. Substance Abuse and Mental Health Services Administration. Adults with SMI and  
39  
40 17 children/youth with SED. U.S. Department of Health and Human Services. 2020.  
41  
42 18 Available from: <https://www.samhsa.gov/dbhis-collections/smi>  
43  
44  
45 19 54. McGowan J, Sampson M, Salzwedel DM, Cogo E, Foerster V, Lefebvre C. PRESS peer  
46  
47 20 review of electronic search strategies: 2015 guideline statement. *J Clin Epidemiol.*  
48  
49 21 2016;75:40–46. <https://doi.org/10.1016/j.jclinepi.2016.01.021>  
50  
51  
52 22 55. Veritas Health Innovation. Covidence systematic review software. 2021. Available from:  
53  
54 23 [www.covidence.org](http://www.covidence.org)  
55  
56  
57  
58  
59  
60

## SCOPING REVIEW PROTOCOL

- 1 56. Raanaas RK, Bjøntegaard HØ, Shaw L. A scoping review of participatory action research  
2 to promote mental health and resilience in youth and adolescents. *Adolesc Res Rev.*  
3 2020;5(2):137–152. <https://doi.org/10.1007/s40894-018-0097-0>  
4 57. McGorry PD, Mei C. Early intervention in youth mental health: Progress and future  
5 directions. *Evid Based Ment Heal.* 2018;21(4):182–184. [https://doi.org/10.1136/ebmental-](https://doi.org/10.1136/ebmental-2018-300060)  
6 2018-300060  
7 58. Greenhalgh T, Robert G, Macfarlane F, Bate P, Kyriakidou O, Peacock R. Storylines of  
8 research in diffusion of innovation: A meta-narrative approach to systematic review. *Soc*  
9 *Sci Med.* 2005;61(2):417–430. <https://doi.org/10.1016/j.socscimed.2004.12.001>  
10 59. Barry CA, Britten N, Barber N, Bradley C, Stevenson F. Using reflexivity to optimize  
11 teamwork in qualitative research. *Qual Health Res.* 1999;9(1):26–44.  
12 <https://doi.org/10.1177/104973299129121677>  
13 60. Finlay L. Negotiating the swamp: The opportunity and challenge of reflexivity in research  
14 practice. *Qual Res.* 2002;2(2):209–230. <https://doi.org/10.1177/146879410200200205>  
15 61. Jacobson D, Mustafa N. Social identity map: A reflexivity tool for practicing explicit  
16 positionality in critical qualitative research. *Int J Qual Methods.*  
17 2019;18:160940691987007. <https://doi.org/10.1177/1609406919870075>  
18 62. Keown K, Van Eerd D, Irvin E. Stakeholder engagement opportunities in systematic  
19 reviews: Knowledge transfer for policy and practice. *J Contin Educ Health Prof.*  
20 2008;28(2):67–72. <https://doi.org/10.1002/chp.159>  
21 63. Hutcheon E, Lashewicz B. Theorizing resilience: Critiquing and unbounding a  
22 marginalizing concept. *Disabil Soc.* 2014;29(9):1383–1397.  
23 <https://doi.org/10.1080/09687599.2014.934954>



## SCOPING REVIEW PROTOCOL

- 1  
2  
3 1 64. McCrae N. The weaponizing of mental health. *J Adv Nurs*. 2019;75(4):709–710.  
4  
5 2 <https://doi.org/10.1111/jan.13878>  
6  
7 3 65. Shalanski L, Ewashen C. An interpretive phenomenological study of recovering from  
8 4 mental illness: Teenage girls' portrayals of resilience. *Int J Ment Health Nurs*.  
9  
10 5 2019;28(2):492–500. <https://doi.org/10.1111/inm.12552>  
11  
12  
13  
14 6  
15  
16  
17  
18  
19  
20  
21  
22  
23  
24  
25  
26  
27  
28  
29  
30  
31  
32  
33  
34  
35  
36  
37  
38  
39  
40  
41  
42  
43  
44  
45  
46  
47  
48  
49  
50  
51  
52  
53  
54  
55  
56  
57  
58  
59  
60

## SCOPING REVIEW PROTOCOL

## Appendix A

## PRISMA-P Checklist

|                           |                     | Reporting Item                                                                                                                                                                                                                | Page Number |
|---------------------------|---------------------|-------------------------------------------------------------------------------------------------------------------------------------------------------------------------------------------------------------------------------|-------------|
| <b>Title</b>              |                     |                                                                                                                                                                                                                               |             |
| Identification            | <a href="#">#1a</a> | Identify the report as a protocol of a systematic review                                                                                                                                                                      | 2           |
| Update                    | <a href="#">#1b</a> | If the protocol is for an update of a previous systematic review, identify as such                                                                                                                                            | N/A         |
| <b>Registration</b>       |                     |                                                                                                                                                                                                                               |             |
|                           | <a href="#">#2</a>  | If registered, provide the name of the registry (such as PROSPERO) and registration number                                                                                                                                    | 2, 8        |
| <b>Authors</b>            |                     |                                                                                                                                                                                                                               |             |
| Contact                   | <a href="#">#3a</a> | Provide name, institutional affiliation, e-mail address of all protocol authors; provide physical mailing address of corresponding author                                                                                     | 1           |
| Contribution              | <a href="#">#3b</a> | Describe contributions of protocol authors and identify the guarantor of the review                                                                                                                                           | 1, 22       |
| <b>Amendments</b>         |                     |                                                                                                                                                                                                                               |             |
|                           | <a href="#">#4</a>  | If the protocol represents an amendment of a previously completed or published protocol, identify as such and list changes; otherwise, state plan for documenting important protocol amendments                               | N/A         |
| <b>Support</b>            |                     |                                                                                                                                                                                                                               |             |
| Sources                   | <a href="#">#5a</a> | Indicate sources of financial or other support for the review                                                                                                                                                                 | --          |
| Sponsor                   | <a href="#">#5b</a> | Provide name for the review funder and / or sponsor                                                                                                                                                                           | --          |
| Role of sponsor or funder | <a href="#">#5c</a> | Describe roles of funder(s), sponsor(s), and / or institution(s), if any, in developing the protocol                                                                                                                          | --          |
| <b>Introduction</b>       |                     |                                                                                                                                                                                                                               |             |
| Rationale                 | <a href="#">#6</a>  | Describe the rationale for the review in the context of what is already known                                                                                                                                                 | 4-7         |
| Objectives                | <a href="#">#7</a>  | Provide an explicit statement of the question(s) the review will address with reference to participants, interventions, comparators, and outcomes (PICO)                                                                      | 8-10        |
| <b>Methods</b>            |                     |                                                                                                                                                                                                                               |             |
| Eligibility criteria      | <a href="#">#8</a>  | Specify the study characteristics (such as PICO, study design, setting, time frame) and report characteristics (such as years considered, language, publication status) to be used as criteria for eligibility for the review | 11-14       |

## SCOPING REVIEW PROTOCOL

|    |                    |                      |                                                           |
|----|--------------------|----------------------|-----------------------------------------------------------|
| 1  |                    |                      |                                                           |
| 2  |                    |                      |                                                           |
| 3  | Information        | <a href="#">#9</a>   | Describe all intended information sources (such as        |
| 4  | sources            |                      | electronic databases, contact with study authors, trial   |
| 5  |                    |                      | registers or other grey literature sources) with planned  |
| 6  |                    |                      | dates of coverage                                         |
| 7  |                    |                      |                                                           |
| 8  | Search strategy    | <a href="#">#10</a>  | Present draft of search strategy to be used for at least  |
| 9  |                    |                      | one electronic database, including planned limits,        |
| 10 |                    |                      | such that it could be repeated                            |
| 11 |                    |                      |                                                           |
| 12 | Study records -    | <a href="#">#11a</a> | Describe the mechanism(s) that will be used to            |
| 13 | data management    |                      | manage records and data throughout the review             |
| 14 | Study records -    | <a href="#">#11b</a> | State the process that will be used for selecting         |
| 15 | selection process  |                      | studies (such as two independent reviewers) through       |
| 16 |                    |                      | each phase of the review (that is, screening, eligibility |
| 17 |                    |                      | and inclusion in meta-analysis)                           |
| 18 |                    |                      |                                                           |
| 19 | Study records -    | <a href="#">#11c</a> | Describe planned method of extracting data from           |
| 20 | data collection    |                      | reports (such as piloting forms, done independently,      |
| 21 | process            |                      | in duplicate), any processes for obtaining and            |
| 22 |                    |                      | confirming data from investigators                        |
| 23 |                    |                      |                                                           |
| 24 | Data items         | <a href="#">#12</a>  | List and define all variables for which data will be      |
| 25 |                    |                      | sought (such as PICO items, funding sources), any         |
| 26 |                    |                      | pre-planned data assumptions and simplifications          |
| 27 |                    |                      |                                                           |
| 28 | Outcomes and       | <a href="#">#13</a>  | List and define all outcomes for which data will be       |
| 29 | prioritization     |                      | sought, including prioritization of main and additional   |
| 30 |                    |                      | outcomes, with rationale                                  |
| 31 |                    |                      |                                                           |
| 32 | Risk of bias in    | <a href="#">#14</a>  | Describe anticipated methods for assessing risk of        |
| 33 | individual studies |                      | bias of individual studies, including whether this will   |
| 34 |                    |                      | be done at the outcome or study level, or both; state     |
| 35 |                    |                      | how this information will be used in data synthesis       |
| 36 |                    |                      |                                                           |
| 37 | Data synthesis     | <a href="#">#15a</a> | Describe criteria under which study data will be          |
| 38 |                    |                      | quantitatively synthesised                                |
| 39 |                    |                      |                                                           |
| 40 | Data synthesis     | <a href="#">#15b</a> | If data are appropriate for quantitative synthesis,       |
| 41 |                    |                      | describe planned summary measures, methods of             |
| 42 |                    |                      | handling data and methods of combining data from          |
| 43 |                    |                      | studies, including any planned exploration of             |
| 44 |                    |                      | consistency (such as I <sup>2</sup> , Kendall's $\tau$ )  |
| 45 |                    |                      |                                                           |
| 46 | Data synthesis     | <a href="#">#15c</a> | Describe any proposed additional analyses (such as        |
| 47 |                    |                      | sensitivity or subgroup analyses, meta-regression)        |
| 48 |                    |                      |                                                           |
| 49 | Data synthesis     | <a href="#">#15d</a> | If quantitative synthesis is not appropriate, describe    |
| 50 |                    |                      | the type of summary planned                               |
| 51 |                    |                      |                                                           |
| 52 |                    |                      |                                                           |
| 53 |                    |                      |                                                           |
| 54 |                    |                      |                                                           |
| 55 |                    |                      |                                                           |
| 56 |                    |                      |                                                           |
| 57 |                    |                      |                                                           |
| 58 |                    |                      |                                                           |
| 59 |                    |                      |                                                           |
| 60 |                    |                      |                                                           |

## SCOPING REVIEW PROTOCOL

|                            |                                   |                     |                                                                                                                               |            |
|----------------------------|-----------------------------------|---------------------|-------------------------------------------------------------------------------------------------------------------------------|------------|
| 1<br>2<br>3<br>4<br>5<br>6 | Meta-bias(es)                     | <a href="#">#16</a> | Specify any planned assessment of meta-bias(es) (such as publication bias across studies, selective reporting within studies) | See note 2 |
| 7<br>8<br>9<br>10          | Confidence in cumulative evidence | <a href="#">#17</a> | Describe how the strength of the body of evidence will be assessed (such as GRADE)                                            | See note 3 |

---

**Author notes**

1. N/A for scoping reviews
2. N/A for scoping reviews
3. N/A for scoping reviews

Citation: Moher D, Shamseer L, Clarke M, Ghersi D, Liberati A, Petticrew M, Shekelle P, Stewart LA. Preferred Reporting Items for Systematic Review and Meta-Analysis Protocols (PRISMA-P) 2015 statement. Syst Rev. 2015;4(1):1.

The PRISMA-P elaboration and explanation paper is distributed under the terms of the Creative Commons Attribution License CC-BY. This checklist can be completed online using <https://www.goodreports.org/>, a tool made by the [EQUATOR Network](#) in collaboration with [Penelope.ai](#)

SCOPING REVIEW PROTOCOL

Appendix B

Preliminary Medline Database Search Strategy

| Search line # | PCC conceptual term of interest     | Search term entered into OVID-Medline                                                                                                                                                                                                                                                                                                                                                                                                                                                                                                                                                                                                                                                                                                                                                                                                                                                                                                                                                                                                                                                                                                                                                      | Results |
|---------------|-------------------------------------|--------------------------------------------------------------------------------------------------------------------------------------------------------------------------------------------------------------------------------------------------------------------------------------------------------------------------------------------------------------------------------------------------------------------------------------------------------------------------------------------------------------------------------------------------------------------------------------------------------------------------------------------------------------------------------------------------------------------------------------------------------------------------------------------------------------------------------------------------------------------------------------------------------------------------------------------------------------------------------------------------------------------------------------------------------------------------------------------------------------------------------------------------------------------------------------------|---------|
| 1             | Population (Transition-age youth)   | exp Adolescent/ or exp Young Adult/                                                                                                                                                                                                                                                                                                                                                                                                                                                                                                                                                                                                                                                                                                                                                                                                                                                                                                                                                                                                                                                                                                                                                        | 2578438 |
| 2             | Population (Transition-age youth)   | (youth* or transition age youth* or teen* or adolescen* or emerging adult* or young adult* or early adult* or young person* or young people* or juvenile*).tw,kf.                                                                                                                                                                                                                                                                                                                                                                                                                                                                                                                                                                                                                                                                                                                                                                                                                                                                                                                                                                                                                          | 583093  |
| 3             | Population (Serious mental illness) | exp Mental Disorders/ or exp Anxiety Disorders/ or exp "Bipolar and Related Disorders"/ or exp Dissociative Disorders/ or exp "Feeding and Eating Disorders"/ or exp Mood Disorders/ or exp "Attention Deficit and Disruptive Behavior Disorders"/ or exp Personality Disorders/ or exp Schizophrenia/ or exp Psychotic Disorders/ or exp Affective Disorders, Psychotic/ or exp Capgras Syndrome/ or exp Delusional Parasitosis/ or exp Morgellons Disease/ or exp Paranoid Disorders/ or exp Somatoform Disorders/ or exp "Trauma and Stressor Related Disorders"/ or exp Mentally Ill Persons/                                                                                                                                                                                                                                                                                                                                                                                                                                                                                                                                                                                          | 1334146 |
| 4             | Population (Serious mental illness) | (mental disorder* or mental illness* or psychiatric disabilit* or psychiatric disorder* or psychiatric diagnosis* or serious emotional disturbance* or severe emotional disturbance* or "mental health condition*" or anxiety disorder* or phobia* or phobic disorder* or panic disorder* or obsessive-compulsive disorder* or OCD or bipolar disorder* or manic disorder* or manic depression or dissociative disorder* or multiple-personality disorder or eating disorder* or anorexi* or bulimi* or binge eating* or "eating disorder not otherwise specified" or EDNOS or "other specified feeding or eating disorder" or OSFED or disordered eating or mood disorder* or depressive disorder* or affective disorder* or depression or cyclothymic disorder* or cyclothymia or dysthymic disorder* or dysthymia or personality disorder* or schizophrenia spectrum disorder* or schizophrenia or psychotic disorder* or psychosis or psychoses or schizoaffective disorder* or psychotic affective disorder* or paranoid disorder* or somatoform disorder* or body dysmorphic disorder* or body dysmorphi* or post-traumatic stress disorder* or adjustment disorder* or PTSD).tw,kf. | 749590  |
| 5             | Concept (Resilience)                | exp Resilience, Psychological/                                                                                                                                                                                                                                                                                                                                                                                                                                                                                                                                                                                                                                                                                                                                                                                                                                                                                                                                                                                                                                                                                                                                                             | 7420    |
| 6             | Concept (Resilience)                | (resilienc*).tw,kf.                                                                                                                                                                                                                                                                                                                                                                                                                                                                                                                                                                                                                                                                                                                                                                                                                                                                                                                                                                                                                                                                                                                                                                        | 36035   |
| 7             |                                     | 1 or 2                                                                                                                                                                                                                                                                                                                                                                                                                                                                                                                                                                                                                                                                                                                                                                                                                                                                                                                                                                                                                                                                                                                                                                                     | 2800005 |
| 8             |                                     | 3 or 4                                                                                                                                                                                                                                                                                                                                                                                                                                                                                                                                                                                                                                                                                                                                                                                                                                                                                                                                                                                                                                                                                                                                                                                     | 1668372 |
| 9             |                                     | 5 or 6                                                                                                                                                                                                                                                                                                                                                                                                                                                                                                                                                                                                                                                                                                                                                                                                                                                                                                                                                                                                                                                                                                                                                                                     | 37459   |
| 10            |                                     | 7 and 8 and 9                                                                                                                                                                                                                                                                                                                                                                                                                                                                                                                                                                                                                                                                                                                                                                                                                                                                                                                                                                                                                                                                                                                                                                              | 3286    |
| 11            |                                     | limit 10 to (english language and humans and yr="2000 - Current")                                                                                                                                                                                                                                                                                                                                                                                                                                                                                                                                                                                                                                                                                                                                                                                                                                                                                                                                                                                                                                                                                                                          | 2796    |

# BMJ Open

## Understanding resilience among transition-age youth with serious mental illness: Protocol for a scoping review

|                                 |                                                                                                                                                                                                                                                                                                                                                                                                                                                                                                                                                                                                                                     |
|---------------------------------|-------------------------------------------------------------------------------------------------------------------------------------------------------------------------------------------------------------------------------------------------------------------------------------------------------------------------------------------------------------------------------------------------------------------------------------------------------------------------------------------------------------------------------------------------------------------------------------------------------------------------------------|
| Journal:                        | <i>BMJ Open</i>                                                                                                                                                                                                                                                                                                                                                                                                                                                                                                                                                                                                                     |
| Manuscript ID                   | bmjopen-2021-059826.R1                                                                                                                                                                                                                                                                                                                                                                                                                                                                                                                                                                                                              |
| Article Type:                   | Protocol                                                                                                                                                                                                                                                                                                                                                                                                                                                                                                                                                                                                                            |
| Date Submitted by the Author:   | 30-Mar-2022                                                                                                                                                                                                                                                                                                                                                                                                                                                                                                                                                                                                                         |
| Complete List of Authors:       | Nesbitt, Amy; University of Toronto, Rehabilitation Sciences Institute Sabiston, Catherine; University of Toronto, Faculty of Kinesiology and Physical Education<br>deJonge, Melissa; University of Toronto, Faculty of Kinesiology and Physical Education<br>Barbic, Skye; The University of British Columbia, Occupational Science and Occupational Therapy; Foundry<br>Kozloff, Nicole; Centre for Addiction and Mental Health; University of Toronto, Department of Psychiatry<br>Nalder, Emily; University of Toronto, Occupational Science and Occupational Therapy; University of Toronto, Rehabilitation Sciences Institute |
| <b>Primary Subject Heading</b>: | Mental health                                                                                                                                                                                                                                                                                                                                                                                                                                                                                                                                                                                                                       |
| Secondary Subject Heading:      | Health services research                                                                                                                                                                                                                                                                                                                                                                                                                                                                                                                                                                                                            |
| Keywords:                       | MENTAL HEALTH, PSYCHIATRY, PUBLIC HEALTH                                                                                                                                                                                                                                                                                                                                                                                                                                                                                                                                                                                            |
|                                 |                                                                                                                                                                                                                                                                                                                                                                                                                                                                                                                                                                                                                                     |

SCHOLARONE™  
Manuscripts

## SCOPING REVIEW PROTOCOL

1  
2  
3 1 **Understanding resilience among transition-age youth with serious mental illness: Protocol**  
4  
5  
6 2 **for a scoping review**

7  
8 3 Amy E. Nesbitt, MSc (amy.nesbitt@mail.utoronto.ca)<sup>a\*</sup>

9  
10 4 Catherine M. Sabiston, PhD (catherine.sabiston@utoronto.ca)<sup>b</sup>

11  
12 5 Melissa L. deJonge, MSc (melissa.dejonge@utoronto.ca)<sup>b</sup>

13  
14 6 Skye Barbic, PhD (skye.barbic@ubc.ca)<sup>c,d</sup>

15  
16 7 Nicole Kozloff, MD, SM (nicole.kozloff@camh.ca)<sup>e</sup>

17  
18 8 Emily Nalder, PhD (emily.nalder@utoronto.ca)<sup>a,f</sup>

19  
20  
21  
22 9 <sup>a</sup> Rehabilitation Sciences Institute, University of Toronto (500 University Avenue, Toronto, ON,  
23 Canada, M5G 1V7)

24  
25 11 <sup>b</sup> Faculty of Kinesiology and Physical Education, University of Toronto (55 Harbord Street,  
26 Toronto, ON, Canada, M5S 2W6)

27  
28 13 <sup>c</sup> Department of Occupational Science and Occupational Therapy, University of British  
29 Columbia (T325 - 2211 Wesbrook Mall, Vancouver, BC, Canada, V6T 2B5)

30  
31 15 <sup>d</sup> Foundry (Vancouver, BC, Canada)

32  
33 16 <sup>e</sup> Centre for Addiction and Mental Health (250 College Street, Toronto, ON, Canada, M5T 1R8)

34  
35 17 <sup>f</sup> Department of Occupational Science and Occupational Therapy, University of Toronto (500  
36 University Avenue, Toronto, ON, Canada, M5G 1V7)

37  
38 19 \*Corresponding author: Amy E. Nesbitt, MSc, OT Reg. (Ont.). Rehabilitation Sciences Institute,  
39 University of Toronto, 500 University Avenue, Toronto, ON, Canada, M5G 1V7. Phone: 416-  
40 978-5837. Fax: 416-971-2118. Email: amy.nesbitt@mail.utoronto.ca  
41  
42  
43

44 23 **Keywords:** adolescent, young adult, resilience, mental health, review

45  
46 24 **Word Count:** 4942

47  
48  
49 25

50  
51 26

52  
53 27

## SCOPING REVIEW PROTOCOL

1           **Understanding resilience among transition-age youth with serious mental illness: Protocol**  
2  
3           **for a scoping review**

4  
5  
6           **Abstract**

7           **Introduction:** Transition-age youth (16-29 years old) are disproportionately affected by the  
8           onset, impact and burden of serious mental illness (SMI; e.g., depression, bipolar disorder,  
9           schizophrenia spectrum disorders). Emerging evidence has increasingly highlighted the concept  
10          of resilience in mental health promotion and treatment approaches for this population. A  
11          comprehensive synthesis of existing evidence is needed to enhance conceptual clarity in this  
12          area, identify knowledge gaps, and inform future research and practice. As such, the present  
13          scoping review is guided by the following questions: How has resilience been conceptualized  
14          and operationalized in the transition-age youth mental health literature? What factors influence  
15          resilience among transition-age youth with SMI, and what outcomes have been studied within  
16          the context of transition-age youth's mental health recovery?

17          **Methods and analysis:** The present protocol will follow six key stages, in accordance with  
18          Arksey and O'Malley's (2005) established scoping review methodology and recent iterations of  
19          this framework, and has been registered with Open Science Framework (<https://osf.io/rzfc5>). The  
20          protocol and review process will be carried out by a multidisciplinary team in consultation with  
21          community stakeholders. A comprehensive search strategy will be conducted across multiple  
22          electronic databases to identify relevant empirical literature. Included sources will address the  
23          population of transition-age youth (16-29 years) diagnosed with SMI, the concept of resilience  
24          (in any context), and will report original research written in English. Data screening and  
25          extraction will be completed by at least two independent reviewers. Following meta-narrative



## SCOPING REVIEW PROTOCOL

1 review and qualitative content analyses, findings will be synthesized as a descriptive overview  
2  
3  
4  
5  
6 with tabular and graphical summaries.

7  
8 **Ethics and dissemination:** Institutional research ethics board approval will be obtained prior to  
9  
10 conducting the community stakeholder input and reaction meetings (consultation stage of this  
11  
12 review). Results will be disseminated through conference presentations, publications, and user-  
13  
14 friendly reports and graphics.  
15  
16

### 8 **Strengths and limitations of this study**

- 9 • This scoping review study will follow recent recommendations and guidance documents  
10 to promote methodological rigor and has been registered to enhance transparency.
- 11 • Variability in how the population (transition-age youth) and concept (resilience) have  
12 been defined, as well as restrictions to the search strategy based on language, date, and  
13 publication type may limit the breadth of the search.
- 14 • An assessment of the methodological quality of included studies will not be conducted  
15 which limits the types of conclusions and implications that can be drawn from the review.
- 16 • We will apply an iterative and team-based approach, in consultation with community  
17 stakeholders (transition-age youth with SMI, clinicians, researchers) to improve the  
18 applicability and dissemination of results.

## SCOPING REVIEW PROTOCOL

**Introduction**

Transition-age youth (16-29 years old) are the highest risk age group for onset of serious mental illness (SMI; mental illnesses that cause substantial functional impairment, e.g., depression, bipolar disorder, schizophrenia spectrum disorders), the single most disabling group of disorders worldwide (1,2). The experience of mental illness for young people is unique, in that it arises during a critical period of psychosocial development, identity formation, and many complex life transitions (3,4). Access to supportive treatment and relationships, social marginalization, and stigma continue to influence the course and severity of mental illness for transition-age youth (5). Indeed, SMI can negatively impact one's overall physical health, quality of life, and engagement in meaningful life roles and activities, including academics, employment, and social relationships (1,4,6,7). Further, the experience of chronic and persistent symptoms of mental illness can contribute to suicide risk, which is the second leading cause of death among individuals 15-29 years old globally (8,9). Despite the increased risk and burden of SMI among transition-age youth, this age group faces many barriers in accessing service and supports, as they transition out of youth services and into the adult mental health and addiction services sector (10,11). As such, the identification of factors that contribute to transition-age youth's mental health recovery and early intervention are now recognized as priority areas within national and global mental health strategies and guidelines (11–14).

Of particular interest, researchers and clinicians have emphasized the importance of promoting *resilience* in transition-age youth's mental health recovery. Most definitions of resilience refer to positive adaptation in the face of significant adversity as a central or defining feature. However, there are many different ways of conceptualizing resilience (e.g., as a trait, outcome, or dynamic process) (15,16), which has led to some ambiguity in how resilience is

## SCOPING REVIEW PROTOCOL

1 defined and understood across different research disciplines and perspectives (17,18). For  
2  
3  
4  
5  
6  
7  
8  
9  
10  
11  
12  
13  
14  
15  
16  
17  
18  
19  
20  
21  
22  
23  
24  
25  
26  
27  
28  
29  
30  
31  
32  
33  
34  
35  
36  
37  
38  
39  
40  
41  
42  
43  
44  
45  
46  
47  
48  
49  
50  
51  
52  
53  
54  
55  
56  
57  
58  
59  
60

1 defined and understood across different research disciplines and perspectives (17,18). For  
2 example, many authors have conceptualized and discussed resilience as an outcome resulting  
3 from changes made at the individual level, or in relation to positive personal attributes (e.g.,  
4 hope, self-efficacy, coping) (19,20). This aligns with early definitions of resilience as an  
5 exceptional personal quality or trait, that an individual either has or does not have, which will  
6 determine their capacity to both endure incredibly stressful life events and continue on a path  
7 towards full functional and emotional recovery (15,21,22). Conceptualizations of resilience as a  
8 personal trait or outcome have been criticized in recent research as this does not recognize the  
9 critical role of one's environment and available resources (17,23).

10 In more contemporary and holistic conceptions, "resilience has come to be seen less in  
11 terms of static characteristics within the individual and more as a dynamic and multi-faceted  
12 family of processes that evolve over time" (p. 234) (24). To illustrate, resilience has been  
13 conceptualized as a dynamic process, involving one's personal characteristics, environment, and  
14 support networks, that influence how an individual "bounces back" from challenging  
15 circumstances (e.g., onset of mental illness) (16–18,25). This also acknowledges the integral role  
16 of not only the individual, but the social and ecological systems that influence resilience (26,27).  
17 For example, Wathen and colleagues (2012) offer the following definition further contextualized  
18 to the field of trauma and mental health: "Resilience is a dynamic process in which  
19 psychological, social, environmental and biological factors interact to enable an individual at any  
20 stage of life to develop, maintain, or regain their mental health despite exposure to adversity" (p.  
21 10) (28). Through this lens, resilience is seen as fluid (rather than a fixed or pre-determined  
22 trait), arising through multiple pathways that lead to positive indices of flourishing and  
23 functioning (29). Taken together, processes of resilience are shaped by the complex interplay

## SCOPING REVIEW PROTOCOL

1 between individual experiences of stress / adversity, multimodal “*resilience factors*” (e.g., risks,  
2 internal and external protective factors, self-regulatory strategies), as well as one’s adaptation  
3 and other resilience-related outcomes (25,30).

4 This process-oriented perspective of resilience has gained increased attention in mental  
5 health and rehabilitation sciences research over the past two decades (19,29), and has aligned  
6 with the paradigm shift towards recovery models of mental health and the growing popularity  
7 and application of positive psychology principles in psychiatry (31). Indeed, resilience research  
8 and recovery models of mental health share an orientation towards understanding the processes  
9 that underly individual experiences (embedded within one’s sociocultural context / environment)  
10 and emphasize the importance of hope, meaning, engagement, and life satisfaction in one’s  
11 recovery (32–34). Recent conceptual models (35) and interventions (36,37) focused on youth-  
12 specific and integrated mental health services also highlight resilience as an important aspect to  
13 the recovery process. Additionally, adopting a resilience perspective aligns with more strengths-  
14 based and transdiagnostic approaches which aim to better understand processes of recovery  
15 relevant to a broader range of adolescent and young adult mental health service users (38).  
16 Researchers have begun to uncover resilience factors across and beyond specific diagnoses,  
17 which can be targeted in interventions to promote positive development, functioning, and well-  
18 being (26,29,30,39). As such, the study of resilience among transition-age youth with SMI can  
19 inform developments in recovery-oriented approaches to service delivery and warrants further  
20 exploration.

21 In sum, emerging evidence and frameworks of resilience provide a unique lens to  
22 understanding mental health among transition-age youth, with the capacity to recognize  
23 individuals’ strengths, and move beyond the common focus on illness, deficits and problems in

## SCOPING REVIEW PROTOCOL

1 rehabilitation sciences (35). However, researchers have not yet developed a theoretical  
2 framework or model of resilience tailored to the unique experiences of transition-age youth who  
3 are diagnosed with SMI to guide research and practice (19). In addition, conceptualizations of  
4 resilience vary across the scientific literature, which directly impacts how the concept of  
5 resilience is understood, operationalized and applied within this context. This is important to  
6 address as discrepancies across definitions of resilience may limit measurement, study  
7 comparisons, and current understandings of resiliency-informed care approaches in research and  
8 clinical practice (23). A comprehensive synthesis of existing evidence will enhance conceptual  
9 clarity in this area, identify factors and outcomes that are relevant to transition-age youth's  
10 resilience, and inform future work.

### **Objectives**

12 The overarching purpose of the present scoping review is to synthesize and describe the  
13 breadth of scientific literature on resilience among transition-age youth diagnosed with SMI,  
14 identify current knowledge gaps, and recommend key areas for future resilience research among  
15 this population. Specifically, this scoping review will explore how the concept of resilience has  
16 been conceptualized and operationalized in the transition-age youth mental health literature, and  
17 identify resilience factors and outcomes that have been studied within the context of transition-  
18 age youth's mental health recovery (e.g., adversity, risks, internal and external protective factors,  
19 self-regulatory strategies, adaptation and resilience-related outcomes). The focus of this review  
20 will be on conceptualizations of resilience from a process-oriented perspective (rather than as a  
21 personal trait or outcome).

### **Methods and Analysis**

## SCOPING REVIEW PROTOCOL

1 A scoping review design was selected based on the exploratory nature of the proposed  
2 research question and the current focus on clarifying the concept of resilience. Particularly, a  
3 scoping review design allows for a comprehensive summary of knowledge, inclusive of more  
4 broad study objectives and methodologies, and is thus recommended for gaining conceptual  
5 clarity and identifying key knowledge gaps (40,41).

6 The scoping review protocol will follow the methodological stages outlined by Arksey  
7 and O'Malley (2005), and extended by Levac and colleagues (2010), including: i) identifying the  
8 research question, ii) identifying relevant studies, iii) study selection, iv) charting the data, v)  
9 collating, summarizing, and reporting the results, and vi) stakeholder consultation (42,43).

10 Throughout the review process, an iterative and reflexive approach will be used in order to refine  
11 the initial protocol as needed in consultation with a community stakeholder group (involving  
12 researchers, clinicians, and transition-age youth with SMI) (42,43). Recent guidance documents  
13 (44) and best practices for conducting and reporting scoping reviews (PRISMA-ScR) (45) will  
14 also be applied to promote methodological rigor and transparency. The PRISMA-P checklist (46)  
15 can be found in Appendix A (online supplementary). The current protocol has been registered  
16 through Open Science Framework (<https://osf.io/rzfc5>), and will be conducted over a one-year  
17 timeframe (December 2021 to November 2022).

### 18 **Stage 1: Identifying the Research Question**

19 This scoping review aims to explore the extent and breadth of the current scientific  
20 literature on resilience among transition-age youth diagnosed with SMI. Specifically, the review  
21 will address two research questions: (1) How has resilience been conceptualized and  
22 operationalized (i.e., defined and measured) in the transition-age youth mental health literature?  
23 (2) What factors influence resilience among transition-age youth with SMI, and what outcomes

## SCOPING REVIEW PROTOCOL

1 have been studied within the context of transition-age youth's mental health recovery? The  
2 research questions have been broadly framed using the PCC mnemonic to address the *population*  
3 of transition-age youth diagnosed with SMI and the *concept* of resilience within any *context* of  
4 one's mental health recovery (41). Each component is further clarified below, in accordance with  
5 the Joanna Briggs Institute scoping review manual (44).

6 **Population.** For the present review, the population is defined as "transition-age youth",  
7 including adolescents and young adults between the ages of 16 and 29 years old, who are  
8 entering adulthood and have been diagnosed with SMI. It is important to note that definitions of  
9 "youth", "adolescents", and "young adults" differ across various cultures and settings, and are  
10 thus highly mixed within the scholarly literature. In order to be inclusive of the most common  
11 European/United Nations/WHO definitions of this age group and reflective of current mental  
12 health service models, the present review will include studies with participants spanning middle  
13 adolescence (age 15) to the "upper limit" of young adulthood (age 36) if the target population is  
14 clearly defined as "transition-age youth" (3,14,47–50). Additionally, serious mental illness  
15 (SMI) is defined as "a mental, behavioral, or emotional disorder resulting in serious functional  
16 impairment, which substantially interferes with or limits one or more major life activities", such  
17 as one's interpersonal relationships, self-care, employment, or recreation (51,52). Definitions of  
18 SMI exclude dementias, developmental disorders, and substance use disorders, as well as mental  
19 disorders due to a general medical condition (52). Examples of mental health conditions that may  
20 meet criteria for SMI include: major depressive disorders, bipolar disorders, borderline  
21 personality disorder, anxiety disorders, eating disorders and schizophrenia spectrum disorders  
22 (51,52). Among youth and adolescents (under age 18) the same definition and examples are  
23 applied but also occasionally termed "serious emotional disturbance" (SED), rather than SMI

## SCOPING REVIEW PROTOCOL

(52,53). Studies with participants experiencing co-morbid disorders which are not the primary focus will also be included in this scoping review.

**Concept.** While definitions of resilience vary across different research disciplines, most definitions refer to positive adaptation in the face of significant challenge, risk or adversity as central or defining features, and acknowledge the importance of sociocultural factors in shaping experiences and understandings of resilience (19). For the purpose of this scoping review, resilience is defined as a dynamic process that unfolds over time, involving multiple resilience factors that interact to enable individuals to negotiate or recover from stressful life events / adversity (e.g., one's personal characteristics, environment and support networks). Studies that adopt this process-oriented perspective will be included, and the following core elements of resilience and resilience factors will be explored: adversity, risks, internal and external protective factors, self-regulatory strategies, adaptation and resilience-related outcomes (25,30). Studies that focus solely on a trait perspective of resilience, similar constructs (e.g., ego-resilience, psychological capital) or biological / genetic / neurophysiological factors will be omitted. Lastly, given our focus on psychological resilience at the person- or individual-level, studies evaluating family- or community-level resilience will not be included.

**Context.** While "clinical recovery" is often defined as a reduction in SMI symptoms or impairment (typically in clinical / health care settings), "personal recovery" refers to the processes that contribute to transition-age youth's hope, development, and engagement in meaningful activities (even while facing SMI) and emphasizes the importance of multiple contexts where this occurs (e.g., spanning personal, familial, social and institutional environments) (35). The present review considers mental health recovery primarily through a personal recovery lens, and will thus explore transition-age youth's resilience in any context of



## SCOPING REVIEW PROTOCOL

1 their mental health recovery, which may include individual, community, and health-oriented  
2 settings (among others).

### 3 **Stage 2: Identifying Relevant Literature**

4 ***Information source.*** To comprehensively review the existing evidence and knowledge  
5 base related to resilience in the field of transition-age youth mental health, empirical sources will  
6 be considered, including original research / primary studies. Specifically, six electronic databases  
7 of value to the fields of psychology, health and rehabilitation sciences will be searched to  
8 identify relevant empirical studies: MEDLINE (Ovid), EMBASE (Ovid), PsycINFO, AMED,  
9 CINAHL, and Scopus. To enhance the comprehensiveness of the search, relevant journals and  
10 the reference list of included sources and similar reviews will be manually searched.

11 ***Search strategy.*** The search terms and search strategy will be developed by the  
12 multidisciplinary review team, in consultation with a health sciences librarian at the University  
13 of Toronto. Importantly, keywords have been carefully selected to best capture the complex and  
14 evolving terminology used to describe the population and concept reflected in our research  
15 question. As mentioned, terms to describe the age group of transition-age youth are highly  
16 variable and inconsistent within the literature (e.g., subject headings / keywords may be inclusive  
17 of youth / teenagers / adolescents / emerging adults / adults etc.). Clinical and lay language to  
18 describe SMI diagnoses have also evolved over time, with “severe and persistent mental illness”  
19 and “chronic mental illness” often cited (52). Further, as reflected in the research aims, there is  
20 currently no consensus on the definition of resilience and conceptualizations differ based on the  
21 context or academic discipline applied (19). To overcome these challenges in the development  
22 and execution of our search, we will utilize the following techniques: i) a multi-step search  
23 process to ensure relevant sources are not missed (an initial limited search strategy favoring

## SCOPING REVIEW PROTOCOL

1 sensitivity over precision will be conducted first and inform potential revisions making the  
2 search strategy more precise); ii) use of Yale MeSH analyzer for piloting; and iii) ongoing expert  
3 consultation. Additionally, the search strategy will undergo peer review to enhance its feasibility  
4 and rigor (e.g., CADTH Peer Review Checklist for Search Strategies) (54).

5 The preliminary search strategy and list of keywords have been developed using  
6 MEDLINE (Ovid) and adapted to each database (see Appendix B online supplementary). The  
7 search strategy will explore specified search terms within subject headings, titles, abstracts and  
8 keywords. Search terms will be combined using appropriate Boolean logic and operators (e.g.,  
9 ‘and’, ‘or’, ‘not’).

### 10 **Stage 3: Study Selection**

11 Study selection will follow a collaborative and iterative screening process among the  
12 review team using Covidence systematic review software (55) and pre-determined eligibility  
13 criteria (42,43). All search results will be exported to Covidence for data management and to  
14 remove duplicates. At least two independent reviewers (authors AN and MD) will complete  
15 screening in two stages for i) title/abstract and ii) full-text review. The reviewers will complete a  
16 calibration exercise using a sample of 10 references to pilot inclusion / exclusion criteria and  
17 compare decisions (e.g., include / exclude / uncertain). Formal title/abstract screening will  
18 commence when 80% agreement is achieved and will involve regular meetings among reviewers  
19 to discuss any challenges or uncertainties. Upon completion of stage 1, full-text references will  
20 be obtained and independently screened by the same two reviewers. The same strategy will be  
21 applied to stage 2 full-text screening, including piloting (calibration exercise for 10 references)  
22 and regular discussion. At each stage, reviewer (inter-rater) agreement will be reported.

## SCOPING REVIEW PROTOCOL

1 Disagreements will be resolved by consensus or by the decision of a third reviewer (senior  
2 authors EN and CS).

3 Included sources will address the population of transition-age youth diagnosed with SMI,  
4 the concept of resilience (in any context), and will contain original peer reviewed research  
5 written in English. Specific language restrictions were made for feasibility purposes.  
6 Additionally, the publishing date was limited to the years 2000 to 2022 as this is the time period  
7 where a significant rise in resilience research emerged within mental health and rehabilitation  
8 sciences (19,29,56). The prioritisation, implementation and evaluation of mental health services  
9 specifically tailored to transition-age youth (e.g., early intervention programs) also mainly took  
10 root after the year 2000 (13,47,57). Further inclusion / exclusion criteria for the two-stage  
11 screening are detailed below.

**Eligibility for Stage 1 Title/Abstract Review:**

12 **Inclusion criteria.** a) Population: Refers to transition-age youth diagnosed or living with  
13 SMI (as defined previously). b) Concept: Resilience / resiliency is identified as a key focus  
14 within the purpose / objectives / research question, outcome measure, and/or findings. c)  
15 Context: Is set in any individual, community or health-oriented context of mental health  
16 recovery. d) Type of source: Peer reviewed original research (quantitative, qualitative, mixed  
17 method). e) Publication language / date: Written in English and published between 2000 and  
18 2022.

19 **Exclusion criteria.** a) Population: Refers to non-clinical population, general population,  
20 children / youth (age 0-14), or childhood developmental disorder. b) Concept: Resilience /  
21 resiliency is not an explicit focus. c) Type of source: Peer reviewed articles with the primary aim  
22 of developing, reporting or validating the psychometric properties of survey measures /  
23

## SCOPING REVIEW PROTOCOL

1 instruments, study protocols, review articles (e.g., systematic/scoping reviews, meta-analyses),  
2 books / book chapters, and grey literature (e.g., editorials, commentaries / reports, clinical  
3 guidelines, conference proceedings, and theses / dissertations). d) Publication language / date:  
4 Written in another language than English and published before January 1, 2000.

### 5 *Eligibility for Stage 2 Full-text Review:*

6 ***Inclusion criteria.*** a) Population: Clearly defined clinical population in accordance with  
7 either: participant self-reported history of SMI; clinician confirmed diagnosis of SMI; or DSM-V  
8 / ICD-10 system diagnostic criteria. b) Concept: Must explicitly define / operationalize the  
9 concept of resilience from a process-oriented perspective and focus on individual-level  
10 resilience.

11 ***Exclusion criteria.*** a) Population: Mixed samples whereby transition-age youth with SMI  
12 are encompassed within broader age groups or the general population (without the stratification  
13 of results / reporting). b) Concept: Trait resilience, other psychological constructs that are similar  
14 or connected to resilience / resiliency (e.g., psychological capital, hardiness, grit, general indices  
15 of subjective well-being), family- or community-level resilience, or biological / genetic /  
16 neurophysiological factors are identified as the sole / primary focus or outcome.

17 While criteria were developed to maintain a broad scope of selected studies, our hope is  
18 that stringent inclusion / exclusion criteria will eliminate sources that only include the concept of  
19 resilience as an opinion, recommendation, vague interpretation, or buzzword – as this will not  
20 aid in enhancing conceptual clarity in this research area. As such, these broad eligibility criteria  
21 may undergo further refinement to ensure that selected sources capture the full breadth of  
22 knowledge available related to resilience among young people with SMI.

### 23 **Stage 4: Data Extraction**

## SCOPING REVIEW PROTOCOL

1           Following recommended data charting methods (42,43), a standardized and systematic  
2  
3  
4  
5  
6  
7  
8  
9  
10  
11  
12  
13  
14  
15  
16  
17  
18  
19  
20  
21  
22  
23  
24  
25  
26  
27  
28  
29  
30  
31  
32  
33  
34  
35  
36  
37  
38  
39  
40  
41  
42  
43  
44  
45  
46  
47  
48  
49  
50  
51  
52  
53  
54  
55  
56  
57  
58  
59  
60

1           Following recommended data charting methods (42,43), a standardized and systematic  
2 charting form (Table 1) will be used to organize and interpret relevant details from the selected  
3 sources in line with our research question and objectives. The following information will be  
4 charted in Excel: i) general document details, ii) key characteristics of empirical studies (e.g.,  
5 research design, methods, intervention details, youth engagement, intersectional approaches,  
6 study population, context), iii) how resilience was conceptualized and operationalized (e.g.,  
7 definition, theoretical framework / model, academic discipline, measures), and iv) resilience  
8 factors and outcomes identified.

9           The preliminary chart form was also developed in accordance with Greenhalgh and  
10 colleagues' (2005) meta-narrative approach (58). Specifically, this meta-narrative approach was  
11 originally created to detail how a field of study or key concept has evolved over time and to  
12 explore potential tensions that exist across research traditions (or "paradigms") within  
13 knowledge syntheses (58). A meta-narrative approach is recommended when examining  
14 complex, heterogeneous bodies of literature where a key concept of interest has been  
15 conceptualized and investigated through different research traditions, and conceptual clarity is  
16 needed (58). According to Greenhalgh et al. (2005), a *research tradition* refers to a paradigm of  
17 inquiry, undertaken by researchers, that shares four key interrelated dimensions (conceptual,  
18 theoretical, methodological, instrumental), and thus shows distinct disciplinary roots, scope and  
19 key concepts (58). Research traditions are often characterized and influenced by seminal  
20 conceptual papers that inform the direction and focus of future work (58). Alternatively, an  
21 *academic discipline* is defined as a broader field of study or branch of knowledge (e.g.,  
22 sociology, psychology, medicine) (58).

## SCOPING REVIEW PROTOCOL

1 Data extraction will be a collaborative and iterative process among the review team to  
 2 ensure that key characteristics, definitions, themes and strengths/limitations are captured. A  
 3 calibration exercise using a sample of 5 studies will be completed by two reviewers to pilot the  
 4 chart form. When agreement of at least 80% is achieved, the two independent reviewers (authors  
 5 AN and MD) will complete the remaining formal data charting procedures for all references. The  
 6 charting form will be revised as needed based on stakeholder feedback. Consensus will be  
 7 reached through discussion or final decision by a third reviewer (senior authors EN and CS) if  
 8 necessary. Any challenges in the organization / categorization of data at this stage will be  
 9 brought to the four content experts on this protocol (CS, SB, NK, EN), each of whom have over  
 10 10 years of research and/or clinical experience in young adult mental health and resiliency.

11 *Table 1. Draft charting form*

|                                                        |                                                                                                                                                                                                 |
|--------------------------------------------------------|-------------------------------------------------------------------------------------------------------------------------------------------------------------------------------------------------|
| General document details                               |                                                                                                                                                                                                 |
| APA citation                                           | Full author, date and journal details.                                                                                                                                                          |
| Country and location                                   | Country of publication (and location if provided).                                                                                                                                              |
| Study characteristics                                  |                                                                                                                                                                                                 |
| Study purpose                                          | Purpose, research question(s), aim(s), and/or objective(s) of the study.                                                                                                                        |
| Study population and sample size                       | Age range, SMI (clinical diagnosis / self-reported; stage of illness), relevant demographic characteristics. Number of participants.                                                            |
| Study design and methods                               | Quantitative, qualitative, or mixed methods. Main experimental, observational or qualitative methods used.                                                                                      |
|                                                        | Intervention (if applicable): Description of key characteristics (e.g., intervention purpose / target, type, main components, duration)                                                         |
|                                                        | Youth engagement (if applicable): Extent to which youth with SMI were engaged through aspects of the research process.                                                                          |
|                                                        | Intersectional approaches (if applicable): Description of recruitment procedures, theoretical frameworks, and analyses addressing diversity and intersecting social identities of participants. |
| Context                                                | The setting of the research if provided (e.g., community, health-oriented, specific treatment / program).                                                                                       |
| Conceptualization and operationalization of resilience |                                                                                                                                                                                                 |

## SCOPING REVIEW PROTOCOL

|                                        |                                                                                                                                           |
|----------------------------------------|-------------------------------------------------------------------------------------------------------------------------------------------|
| Conceptualization                      | How was resilience described from a process-oriented perspective?                                                                         |
| Definition of resilience               | Definition or operationalization of resilience.                                                                                           |
| Theoretical framework/model            | Theory, conceptual model(s) or framework(s) applied.                                                                                      |
| Seminal papers referenced              | Overarching paradigm and seminal conceptual papers that have informed the research (if applicable).                                       |
| Instruments used to measure resilience | Specific measures / surveys employed (if applicable).                                                                                     |
| Academic discipline                    | Broad field of research or practice.                                                                                                      |
| Resilience factors and outcomes        |                                                                                                                                           |
| Adversity / risks                      | Personal or environmental risk factors identified (if applicable).                                                                        |
| Internal / external protective factors | Personal or environmental protective factors identified (if applicable).                                                                  |
| Self-regulatory strategies             | Strategies identified to self-manage mood, emotions, thoughts, and/or behaviors (if applicable).                                          |
| Study outcomes                         | Any outcomes that were measured or described. Description of positive change, resilience-related outcomes, or adaptation (if applicable). |
| Important results                      | Description of main findings and implications.                                                                                            |

**Stage 5: Collating, Summarizing, and Reporting the Results**

The PRISMA-ScR Checklist will guide the presentation of results in the final report (45). This will include a flow diagram to explicitly detail review decision making processes (45). Data from eligible full-texts will be analyzed and collated using meta-narrative and qualitative content analyses as well as descriptive statistics (e.g., frequencies / counts). Results of this scoping review will be summarized narratively in a descriptive overview (42,43).

Qualitative content analysis will be used to identify, analyze, and report patterns across the included empirical sources to understand how resilience has been conceptualized and operationalized among transition-age youth with SMI. Particularly, definitions, measures, resilience factors and outcomes will be open-coded, and then grouped to generate distinct categories. Aspects of the study population and context of mental health recovery may also be analyzed. The inductive and reflexive coding process will be completed by two reviewers

## SCOPING REVIEW PROTOCOL

1 (authors AN and MD) using Nvivo software. Categories will then be reviewed and discussed  
2 with all members of the multidisciplinary review team (CS, SB, NK, EN) for further refinement.  
3 As guided by Greenhalgh et al. (2005) for meta-narrative review, findings will be organized and  
4 synthesized to map conceptualizations of resilience over time and across different research  
5 traditions (58). Research traditions will be identified through a process of grouping articles that  
6 reflect similar theoretical, methodological and/or instrumental approaches (e.g., seminal papers  
7 cited, how the authors frame the concept of resilience within the study outcomes or  
8 implications). This will allow for easier interpretation of the extent and breadth of the current  
9 literature on resilience among transition-age youth diagnosed with SMI. Particularly,  
10 comparisons and tensions across definitions of resilience may be highlighted according to each  
11 paradigm.

12 Reflexivity will support methodological rigor and transparency by explicitly  
13 acknowledging how the researchers' positionality may influence the motivations and  
14 methodological choices that ultimately shape the review process, interpretations, and results (59–  
15 61). Ongoing reflexive practice will be used to address and challenge researcher biases,  
16 assumptions, and preunderstandings that may influence study decisions and analyses, and to  
17 critically analyze positions of privilege and power in research activities. Detailed notes of our  
18 decision-making processes and justifications will be documented throughout all stages of the  
19 scoping review.

20 For the purpose of the present scoping review, we will use a combination of narrative,  
21 tabular, and graphical summaries to present key findings (42,43). A traditional summary chart  
22 will describe key characteristics of each included source (e.g., author and year of publication,  
23 research tradition, academic discipline, study design, study population, definitions of resilience,



## SCOPING REVIEW PROTOCOL

1 measures, main findings). Resilience factors and outcomes will be summarized in a table or  
2 figure. A creative graphical / visual depiction of identified research traditions and timeframe will  
3 also be used to “map” key findings of the review (58). In sum, the analytic approach has been  
4 developed to facilitate conceptual / theoretical advancements in resilience research, identify key  
5 knowledge gaps, and highlight potential future directions in the study of transition-age youth  
6 resilience and mental health. The presentation and reporting of results (through summaries,  
7 tables, and visuals) will be discussed among the multidisciplinary review team and community  
8 stakeholder group. Consistent input from the perspective of researchers, clinicians, and  
9 transition-age youth with SMI will enhance the relevance and utility of the review findings.

### 10 **Stage 6: Stakeholder Consultation**

11 The overarching goal of the current scoping review is to systematically explore the  
12 current extent and breadth of peer reviewed research on resilience among transition-age youth  
13 diagnosed with SMI. Particularly, efforts have been made within the scoping review  
14 methodology to provide a holistic and coherent overview of evidence that can inform future  
15 research, education, and practice (41–43). In order to achieve these goals, the multidisciplinary  
16 review team has been formed to include knowledgeable stakeholders (researchers, clinicians,  
17 knowledge users) with backgrounds in psychiatry / early intervention services (NK),  
18 occupational therapy / resiliency in rehabilitation sciences (AN, SB, EN), and kinesiology /  
19 young adult mental health programming (MD, CS).

20 Following Levac and colleagues’ (2010) recommendations, this scoping review will also  
21 consult with community stakeholders to gain the perspectives of transition-age youth with lived  
22 experience of SMI, clinicians, and other mental health / resiliency researchers (43). To achieve  
23 Stage 6 of this review, qualitative focus groups will be conducted virtually (using online

## SCOPING REVIEW PROTOCOL

teleconferencing). Community stakeholders will be invited through the review team's current research / practice networks and established partnerships with youth-focused mental health services in Canada. Recruitment materials (emails, e-posters) will share details regarding eligibility, focus group participation, and the letter of informed consent form. Interested participants will provide written informed consent by digitally signing a secure online consent form on the University of Toronto's Research Electronic Data Capture (REDCap) platform.

Consultative meetings will be held at two time points to inform: i) the research methods (Topic Consultation and Input Meeting), and ii) interpretation, reporting and knowledge translation strategies (Reaction Meeting). Following current recommendations for stakeholder consultation (43,62,63) and focus group studies (64,65), up to 3 focus groups (n = 6-10 participants each) will be conducted at each time point. For the Topic Consultation and Input Meeting, community stakeholders will be asked about their perspectives of the review objectives and methods, key areas of focus for data extraction and analysis (e.g., important aspects of transition-age youth resilience to capture within the charting form), and what they would most like to learn from the results of the scoping review. At the time of the Reaction Meeting, community stakeholders will be asked about their impression of key review findings (e.g., how resilience has been defined), whether this resonates with them/their experiences, where gaps/tensions exist that require further investigation, and how this knowledge can be applied to support mental health recovery. This will shape how results are presented and interpreted in the final scoping review paper and guide decision making on knowledge dissemination strategies. We will aim for equal representation among the researchers, clinicians, and young people involved in each focus group. The consent form and group norms will be reviewed with participants at the start of each focus group discussion. Focus groups will be co-facilitated by

## SCOPING REVIEW PROTOCOL

1 two members of the review team (AN, MD) virtually using a semi-structured interview guide.  
2  
3 Audio recordings will be transcribed verbatim to complete directed content analysis (66).  
4  
5 Complete methods and results will be detailed in the final report (including stakeholder group  
6 characteristics, sample size, data collection tools, analysis, and findings) (43). Several  
7 recommendations to enhance the trustworthiness of qualitative content analysis will be employed  
8 (67,68), including: (i) member checking, (ii) clear description of the context and participant  
9 characteristics, (iii) transparent reporting of the coding process and agreement, and (iv) use of  
10 illustrative quotes, as well as frequencies / counts where appropriate, to summarize results.

11  
12 Guided by scoping review practices, stakeholder engagement will promote a more  
13 collaborative approach, emphasize the voices of young people and knowledge users, and  
14 ultimately maximize the potential contribution of the research (43). Particularly, involving  
15 transition-age youth with SMI as part of the review process will facilitate feedback on the  
16 relevance and usefulness of the review findings. This is considered essential for not only  
17 advancing research and practice in youth mental health, but also addressing recent concerns of  
18 the “weaponization” of resiliency in rehabilitation (e.g., adding stress, pressure, or individual  
19 onus to “become resilient” at times of increased vulnerability) by drawing on the values and  
20 perspectives of young people (69–71).

### **Patient and Public Involvement**

21 Patients and members of the public have not been involved in the design of this scoping  
22 review and the protocol development. However, the perspectives of transition-age youth who  
23 have experienced SMI will be gathered during the review process. Their feedback will inform  
24 our methods, interpretation of results, and knowledge dissemination plan.

### **Ethics and Dissemination**

## SCOPING REVIEW PROTOCOL

1 Institutional research ethics board approval will be received prior to the completion of the  
2 community stakeholder input and reaction meetings (stage 6). Results of the review will be  
3 disseminated through traditional approaches, including open-access peer-reviewed  
4 publication(s), presentations at 1-2 national/international conferences, and a plain-language  
5 summary report. Additional knowledge translation strategies may be used dependent on  
6 community stakeholder feedback to share findings, key messages and future directions (e.g.,  
7 infographics, social media).

### Conclusion

8 The distinct impact and burden of SMI among young people has been increasingly  
9 recognized among researchers and clinicians. This has provoked new research and care  
10 approaches centered on building resiliency. Despite a recent surge in examinations of resilience  
11 in the context of transition-age youth mental health recovery, there remains a lack of  
12 understanding on the core meanings, processes and outcomes of resilience among this  
13 population. To our knowledge, this will be the first scoping review to systematically examine  
14 how resilience is conceptualized and operationalized among transition-age youth with SMI, and  
15 explore what resilience factors and outcomes have been studied. A comprehensive synthesis,  
16 developed in collaboration with community stakeholders, is needed to advance research and  
17 clinical practice.

## SCOPING REVIEW PROTOCOL

1 **Contributorship Statement:** AN led the conceptualization of this review and drafted the  
2  
3  
4  
5  
6  
7  
8  
9  
10  
11  
12  
13  
14  
15  
16  
17  
18  
19  
20  
21  
22  
23  
24  
25  
26  
27  
28  
29  
30  
31  
32  
33  
34  
35  
36  
37  
38  
39  
40  
41  
42  
43  
44  
45  
46  
47  
48  
49  
50  
51  
52  
53  
54  
55  
56  
57  
58  
59  
60

1 **Contributorship Statement:** AN led the conceptualization of this review and drafted the  
2 protocol manuscript with support from CS, MD, SB, NK, and EN. MD was involved in the  
3 review design and refining the search strategy. CS, SB, NK, and EN were also involved in the  
4 review design, and the development of the eligibility criteria and data extraction forms. All  
5 authors provided feedback on the manuscript and approval for submitting this protocol  
6 manuscript for publication.

7 **Competing Interests:** None declared. There are no competing interests for any author.

8 **Funding:** This research received no specific grant from any funding agency in the public,  
9 commercial or not-for-profit sectors.

10 **Data Sharing Statement:** No data are associated with this article.

11 **Patient Consent:** Not required.

12 **License Statement:** I, the Submitting Author has the right to grant and does grant on behalf of  
13 all authors of the Work (as defined in the below author licence), an exclusive licence and/or a  
14 non-exclusive licence for contributions from authors who are: i) UK Crown employees; ii) where  
15 BMJ has agreed a CC-BY licence shall apply, and/or iii) in accordance with the terms applicable  
16 for US Federal Government officers or employees acting as part of their official duties; on a  
17 worldwide, perpetual, irrevocable, royalty-free basis to BMJ Publishing Group Ltd (“BMJ”) its  
18 licensees and where the relevant Journal is co-owned by BMJ to the co-owners of the Journal, to  
19 publish the Work in BMJ Open and any other BMJ products and to exploit all rights, as set out in  
20 our licence.

21 **Acknowledgements:** We would like to acknowledge Julia Martyniuk, Health Sciences Librarian  
22 (University of Toronto), for their expertise and assistance in developing the search strategy for  
23 this scoping review.

## SCOPING REVIEW PROTOCOL

**References**

1. McGorry P. Transition to adulthood: The critical period for pre-emptive, disease-modifying care for schizophrenia and related disorders. *Schizophr Bull.* 2011 May 1;37(3):524–30.
2. Pearson, C., Janz, T., & Ali J. Mental and substance use disorders in Canada. *Health at a Glance.* Statistics Canada. Catalogue no. 82-624-X. 2013.
3. Arnett JJ, Žukauskienė R, Sugimura K. The new life stage of emerging adulthood at ages 18–29 years: Implications for mental health. *The Lancet Psychiatry.* 2014 Dec;1(7):569–76.
4. Yung, A. R., Cotter, J., & McGorry PD. *Youth Mental Health: Approaches to Emerging Mental Ill-Health in Young People.* Routledge; 2020.
5. Rehm J, Shield KD. Global burden of disease and the impact of mental and addictive disorders. *Curr Psychiatry Rep.* 2019 Feb 7;21(2):10.
6. Fusar-Poli P. Integrated mental health services for the developmental period (0 to 25 Years): A critical review of the evidence. *Front Psychiatry.* 2019 Jun 7;10.
7. Stoep, A. V., Beresford, S. A., Weiss, N. S., McKnight, B., Cauce, A. M., & Cohen P. Community-based study of the transition to adulthood for adolescents with psychiatric disorder. *Am J Epidemiol.* 2000 Aug 15;152(4):352–62.
8. Lozano R, Naghavi M, Foreman K, Lim S, Shibuya K, Aboyans V, et al. Global and regional mortality from 235 causes of death for 20 age groups in 1990 and 2010: A systematic analysis for the Global Burden of Disease Study 2010. *Lancet.* 2012 Dec;380(9859):2095–128.
9. World Health Organization. *Mental health and substance use: Suicide data [Internet].*

## SCOPING REVIEW PROTOCOL

- 1  
2  
3 1 2019. Available from: [https://www.who.int/teams/mental-health-and-substance-use/data-](https://www.who.int/teams/mental-health-and-substance-use/data-research/suicide-data)  
4  
5 2  
6 research/suicide-data  
7  
8 3 10. Burgess PM, Pirkis JE, Slade TN, Johnston AK, Meadows GN, Gunn JM. Service use for  
9  
10 4  
11 mental health problems: Findings from the 2007 National Survey of Mental Health and  
12  
13 5  
14 Wellbeing. *Aust New Zeal J Psychiatry*. 2009 Jul 1;43(7):615–23.  
15  
16 6 11. Mental Health Commission of Canada. Changing directions, changing lives: The mental  
17  
18 7  
19 health strategy for Canada. 2021.  
20  
21 8 12. Ministry of Health and Long-Term Care. Respect, recovery, resilience: Recommendations  
22  
23 9  
24 for Ontario’s mental health & addictions strategy. 2011.  
25  
26 10 13. World Health Organization. Mental health action plan 2013-2020 [Internet]. 2013.  
27  
28 11  
29 Available from: <https://apps.who.int/iris/handle/10665/89966>  
30  
31 12 14. World Health Organization. Guidelines on mental health promotive and preventive  
32  
33 13  
34 interventions for adolescents: Helping adolescents thrive. 2020.  
35  
36 14 15. Fine SB. Resilience and human adaptability: Who rises above adversity? *Am J Occup*  
37  
38 15  
39 *Ther*. 1991 Jun 1;45(6):493–503.  
40  
41 16 16. Masten AS. Ordinary magic: Resilience processes in development. *Am Psychol*.  
42  
43 17  
44 2001;56(3):227–38.  
45  
46 18 17. Luthar SS, Cicchetti D, Becker B. The construct of resilience: A critical evaluation and  
47  
48 19  
49 guidelines for future work. *Child Dev*. 2000 May 28;71(3):543–62.  
50  
51 20 18. Ungar M. *The social ecology of resilience: A handbook of theory and practice*. Springer  
52  
53 21  
54 Science & Business Media; 2011.  
55  
56 22 19. Fletcher D, Sarkar M. Psychological resilience: A review and critique of definitions,  
57  
58 23  
59 concepts, and theory. *Eur Psychol*. 2013 Jan;18(1):12–23.  
60

## SCOPING REVIEW PROTOCOL

- 1 20. Gillespie BM, Chaboyer W, Wallis M. Development of a theoretically derived model of  
2 resilience through concept analysis. *Contemp Nurse*. 2007 May 17;25(1-2):124-35.
- 3 21. Rutten BPF, Hammels C, Geschwind N, Menne-Lothmann C, Pishva E, Schruers K, et al.  
4 Resilience in mental health: Linking psychological and neurobiological perspectives. *Acta*  
5 *Psychiatr Scand*. 2013 Jul 14;128(1):3-20.
- 6 22. Rutter M. Resilience in the face of adversity: Protective factors and resistance to  
7 psychiatric disorder. *Br J Psychiatry*. 1985 Dec 29;147(6):598-611.
- 8 23. Schwarz S. Resilience in psychology: A critical analysis of the concept. *Theory Psychol*.  
9 2018 Aug 29;28(4):528-41.
- 10 24. Van Vliet KJ. Shame and resilience in adulthood: A grounded theory study. *J Couns*  
11 *Psychol*. 2008 Apr;55(2):233-45.
- 12 25. Nalder E, Hartman L, Hunt A, King G. Traumatic brain injury resiliency model: A  
13 conceptual model to guide rehabilitation research and practice. *Disabil Rehabil*. 2019 Oct  
14 23;41(22):2708-17.
- 15 26. Masten AS, Lucke CM, Nelson KM, Stallworthy IC. Resilience in development and  
16 psychopathology: Multisystem perspectives. *Annu Rev Clin Psychol*. 2021 May  
17 7;17(1):521-49.
- 18 27. Ungar M, Theron L. Resilience and mental health: How multisystemic processes  
19 contribute to positive outcomes. *The Lancet Psychiatry*. 2020 May;7(5):441-8.
- 20 28. Wathen CN, MacGregor JC, Hammerton J, Coben JH, Herrman H, Stewart DE, et al.  
21 Priorities for research in child maltreatment, intimate partner violence and resilience to  
22 violence exposures: Results of an international Delphi consensus development process.  
23 *BMC Public Health*. 2012 Dec 21;12(1):684.



## SCOPING REVIEW PROTOCOL

- 1  
2  
3 1 29. Stainton A, Chisholm K, Kaiser N, Rosen M, Upthegrove R, Ruhrmann S, et al.  
4  
5 2 Resilience as a multimodal dynamic process. *Early Interv Psychiatry*. 2019  
6  
7 Aug;13(4):725–32.  
8  
9  
10 4 30. Davydov DM, Stewart R, Ritchie K, Chaudieu I. Resilience and mental health. *Clin*  
11  
12 5 *Psychol Rev*. 2010 Jul;30(5):479–95.  
13  
14 6 31. Schrank B, Brownell T, Tylee A, Slade M. Positive psychology: An approach to  
15  
16 supporting recovery in mental illness. *East Asian Arch Psychiatry*. 2014 Sep;24(3):95–  
17  
18 7 103.  
19  
20 8  
21 9 32. Echezarraga A, Las Hayas C, López de Arroyabe E, Jones SH. Resilience and recovery in  
22  
23 the context of psychological disorders. *J Humanist Psychol*. 2019 May  
24  
25 10 29;002216781985162.  
26  
27 11  
28 12 33. Friesen BJ. Recovery and resilience in children’s mental health: Views from the field.  
29  
30 *Psychiatr Rehabil J*. 2007;31(1):38–48.  
31  
32 13  
33 14 34. Jacob KS. Recovery model of mental illness: A complementary approach to psychiatric  
34  
35 15 care. *Indian J Psychol Med*. 2015 Apr 1;37(2):117–9.  
36  
37 16 35. Rayner S, Thielking M, Lough R. A new paradigm of youth recovery: Implications for  
38  
39 youth mental health service provision. *Aust J Psychol*. 2018 Dec 1;70(4):330–40.  
40  
41 17  
42 18 36. Meyer PS, Gottlieb JD, Penn D, Mueser K, Gingerich S. Individual Resiliency training:  
43  
44 19 An early intervention approach to enhance well-being in people with first-episode  
45  
46 20 psychosis. *Psychiatr Ann*. 2015 Nov;45(11):554–60.  
47  
48 21 37. Oliver KG, Collin P, Burns J, Nicholas J. Building resilience in young people through  
49  
50 meaningful participation. *Aust e-Journal Adv Ment Heal*. 2006 Jan 17;5(1):34–40.  
51  
52 22  
53 23 38. Fusar-Poli P, Solmi M, Brondino N, Davies C, Chae C, Politi P, et al. Transdiagnostic

## SCOPING REVIEW PROTOCOL

- 1 psychiatry: A systematic review. *World Psychiatry*. 2019 Jun 6;18(2):192–207.
- 2
- 3 1
- 4
- 5 2 39. Fritz J, de Graaff AM, Caisley H, van Harmelen A-L, Wilkinson PO. A systematic review
- 6
- 7
- 8 3
- 9
- 10 4
- 11
- 12 40. Colquhoun HL, Levac D, O'Brien KK, Straus S, Tricco AC, Perrier L, et al. Scoping
- 13
- 14
- 15 6
- 16
- 17 7
- 18
- 19 8 41. Munn Z, Peters MDJ, Stern C, Tufanaru C, McArthur A, Aromataris E. Systematic review
- 20
- 21
- 22 9
- 23
- 24 10
- 25
- 26 11 42. Arksey H, O'Malley L. Scoping studies: Towards a methodological framework. *Int J Soc*
- 27
- 28
- 29 12
- 30
- 31 13 43. Levac D, Colquhoun H, O'Brien KK. Scoping studies: Advancing the methodology.
- 32
- 33 14
- 34
- 35 15 44. Peters MDJ, Marnie C, Tricco AC, Pollock D, Munn Z, Alexander L, et al. Updated
- 36
- 37
- 38 16
- 39
- 40 17
- 41
- 42 18 45. Tricco AC, Lillie E, Zarin W, O'Brien KK, Colquhoun H, Levac D, et al. PRISMA
- 43
- 44
- 45 19
- 46
- 47 20
- 48
- 49 21 46. Moher D, Shamseer L, Clarke M, Ghersi D, Liberati A, Petticrew M, et al. Preferred
- 50
- 51
- 52 22
- 53
- 54 23
- 55
- 56
- 57
- 58
- 59
- 60

## SCOPING REVIEW PROTOCOL

- 1  
2  
3 1 47. McGorry P, Bates T, Birchwood M. Designing youth mental health services for the 21st  
4  
5 2 century: Examples from Australia, Ireland and the UK. *Br J Psychiatry*. 2013 Jan  
6  
7 3 2;202(s54):s30–5.  
8  
9  
10 4 48. Mueser KT, Penn DL, Addington J, Brunette MF, Gingerich S, Glynn SM, et al. The  
11  
12 5 NAVIGATE program for first-episode psychosis: Rationale, overview, and description of  
13  
14 6 psychosocial components. *Psychiatr Serv*. 2015 Jul;66(7):680–90.  
15  
16  
17 7 49. Perovic B. Defining youth in contemporary national legal and policy framework across  
18  
19 8 Europe. Partnership between the European Commission and the Council of Europe in the  
20  
21 9 field of youth. 2016.  
22  
23  
24 10 50. United Nations. Definition of youth [Internet]. 2013. Available from: [http://www.un.org/](http://www.un.org/esa/socdev/documents/youth/fact-sheets/youth-definition.pdf)  
25  
26 11 [esa/socdev/documents/youth/fact-sheets/youth-definition.pdf](http://www.un.org/esa/socdev/documents/youth/fact-sheets/youth-definition.pdf).  
27  
28  
29 12 51. National Institute of Mental Health. Mental illness [Internet]. 2021. Available from:  
30  
31 13 <https://www.nimh.nih.gov/health/statistics/mental-illness.shtml#:~:text=Serious mental>  
32  
33 14 [illness \(SMI\) is,or more major life activities](https://www.nimh.nih.gov/health/statistics/mental-illness.shtml#:~:text=Serious mental)  
34  
35  
36 15 52. Substance Abuse and Mental Health Services Administration. Behind the term: Serious  
37  
38 16 mental illness. Development Services Group, Inc. [Internet]. 2016. Available from:  
39  
40 17 <https://www.hsdl.org/?abstract&did=801613>  
41  
42  
43 18 53. Substance Abuse and Mental Health Services Administration. Adults with SMI and  
44  
45 19 children/youth with SED. U.S. Department of Health and Human Services. 2020;  
46  
47 20 54. McGowan J, Sampson M, Salzwedel DM, Cogo E, Foerster V, Lefebvre C. PRESS peer  
48  
49 21 review of electronic search strategies: 2015 guideline statement. *J Clin Epidemiol*. 2016  
50  
51 22 Jul;75:40–6.  
52  
53  
54 23 55. Veritas Health Innovation. Covidence systematic review software [Internet]. 2021.  
55  
56  
57  
58  
59  
60

## SCOPING REVIEW PROTOCOL

- 1 Available from: [www.covidence.org](http://www.covidence.org)
- 2
- 3 1
- 4
- 5 2 56. Raanaas RK, Bjøntegaard HØ, Shaw L. A scoping review of participatory action research
- 6
- 7 to promote mental health and resilience in youth and adolescents. *Adolesc Res Rev*. 2020
- 8
- 9 Jun 1;5(2):137–52.
- 10
- 11 4
- 12 5 57. McGorry PD, Mei C. Early intervention in youth mental health: Progress and future
- 13
- 14 directions. *Evid Based Ment Heal*. 2018 Nov;21(4):182–4.
- 15
- 16 6
- 17 7 58. Greenhalgh T, Robert G, Macfarlane F, Bate P, Kyriakidou O, Peacock R. Storylines of
- 18
- 19 research in diffusion of innovation: A meta-narrative approach to systematic review. *Soc*
- 20
- 21 *Sci Med*. 2005 Jul;61(2):417–30.
- 22
- 23 9
- 24 10 59. Barry CA, Britten N, Barber N, Bradley C, Stevenson F. Using reflexivity to optimize
- 25
- 26 teamwork in qualitative research. *Qual Health Res*. 1999 Jan 1;9(1):26–44.
- 27
- 28 11
- 29 12 60. Finlay L. Negotiating the swamp: The opportunity and challenge of reflexivity in research
- 30
- 31 practice. *Qual Res*. 2002 Aug 17;2(2):209–30.
- 32
- 33 14 61. Jacobson D, Mustafa N. Social identity map: A reflexivity tool for practicing explicit
- 34
- 35 positionality in critical qualitative research. *Int J Qual Methods*. 2019 Jan
- 36
- 37 1;18:160940691987007.
- 38
- 39 16
- 40 17 62. Keown K, Van Eerd D, Irvin E. Stakeholder engagement opportunities in systematic
- 41
- 42 reviews: Knowledge transfer for policy and practice. *J Contin Educ Health Prof*.
- 43
- 44 2008;28(2):67–72.
- 45
- 46 19
- 47 20 63. Sabiston CM, Vani M, DeJonge M, Nesbitt A. Scoping reviews and rapid reviews. *Int Rev*
- 48
- 49 *Sport Exerc Psychol*. 2022.
- 50
- 51 22 64. Hennink MM, Kaiser BN, Weber MB. What influences saturation? Estimating sample
- 52
- 53 sizes in focus group research. *Qual Health Res*. 2019;29(10):1483–96.
- 54
- 55
- 56
- 57
- 58
- 59
- 60

## SCOPING REVIEW PROTOCOL

- 1 65. O'Brien K, Wilkins A, Zack E, Solomon P. Scoping the Field: Identifying Key Research  
2 Priorities in HIV and Rehabilitation. *AIDS Behav.* 2010 Apr 10;14(2):448–58.
- 3 66. Hsieh H-F, Shannon SE. Three approaches to qualitative content analysis. *Qual Health  
4 Res.* 2005 Nov 1;15(9):1277–88.
- 5 67. Graneheim U., Lundman B. Qualitative content analysis in nursing research: Concepts,  
6 procedures and measures to achieve trustworthiness. *Nurse Educ Today.* 2004  
7 Feb;24(2):105–12.
- 8 68. Elo S, Kääriäinen M, Kanste O, Pölkki T, Utriainen K, Kyngäs H. Qualitative content  
9 analysis: A focus on trustworthiness. *SAGE Open.* 2014 Jan 1;4(1):215824401452263.
- 10 69. Hutcheon E, Lashewicz B. Theorizing resilience: Critiquing and unbounding a  
11 marginalizing concept. *Disabil Soc.* 2014 Oct 21;29(9):1383–97.
- 12 70. McCrae N. The weaponizing of mental health. *J Adv Nurs.* 2019 Apr 24;75(4):709–10.
- 13 71. Shalanski L, Ewashen C. An interpretive phenomenological study of recovering from  
14 mental illness: Teenage girls' portrayals of resilience. *Int J Ment Health Nurs.* 2019 Apr  
15 24;28(2):492–500.

## SCOPING REVIEW PROTOCOL

## Appendix A

## PRISMA-P Checklist

|                           |                     | Reporting Item                                                                                                                                                                                                                | Page Number |
|---------------------------|---------------------|-------------------------------------------------------------------------------------------------------------------------------------------------------------------------------------------------------------------------------|-------------|
| <b>Title</b>              |                     |                                                                                                                                                                                                                               |             |
| Identification            | <a href="#">#1a</a> | Identify the report as a protocol of a systematic review                                                                                                                                                                      | 2           |
| Update                    | <a href="#">#1b</a> | If the protocol is for an update of a previous systematic review, identify as such                                                                                                                                            | N/A         |
| <b>Registration</b>       |                     |                                                                                                                                                                                                                               |             |
|                           | <a href="#">#2</a>  | If registered, provide the name of the registry (such as PROSPERO) and registration number                                                                                                                                    | 2, 8        |
| <b>Authors</b>            |                     |                                                                                                                                                                                                                               |             |
| Contact                   | <a href="#">#3a</a> | Provide name, institutional affiliation, e-mail address of all protocol authors; provide physical mailing address of corresponding author                                                                                     | 1           |
| Contribution              | <a href="#">#3b</a> | Describe contributions of protocol authors and identify the guarantor of the review                                                                                                                                           | 1, 23       |
| <b>Amendments</b>         |                     |                                                                                                                                                                                                                               |             |
|                           | <a href="#">#4</a>  | If the protocol represents an amendment of a previously completed or published protocol, identify as such and list changes; otherwise, state plan for documenting important protocol amendments                               | N/A         |
| <b>Support</b>            |                     |                                                                                                                                                                                                                               |             |
| Sources                   | <a href="#">#5a</a> | Indicate sources of financial or other support for the review                                                                                                                                                                 | --          |
| Sponsor                   | <a href="#">#5b</a> | Provide name for the review funder and / or sponsor                                                                                                                                                                           | --          |
| Role of sponsor or funder | <a href="#">#5c</a> | Describe roles of funder(s), sponsor(s), and / or institution(s), if any, in developing the protocol                                                                                                                          | --          |
| <b>Introduction</b>       |                     |                                                                                                                                                                                                                               |             |
| Rationale                 | <a href="#">#6</a>  | Describe the rationale for the review in the context of what is already known                                                                                                                                                 | 4-7         |
| Objectives                | <a href="#">#7</a>  | Provide an explicit statement of the question(s) the review will address with reference to participants, interventions, comparators, and outcomes (PICO)                                                                      | 8-10        |
| <b>Methods</b>            |                     |                                                                                                                                                                                                                               |             |
| Eligibility criteria      | <a href="#">#8</a>  | Specify the study characteristics (such as PICO, study design, setting, time frame) and report characteristics (such as years considered, language, publication status) to be used as criteria for eligibility for the review | 11-14       |

## SCOPING REVIEW PROTOCOL

|                                         |                      |                                                                                                                                                                                                                                                           |            |
|-----------------------------------------|----------------------|-----------------------------------------------------------------------------------------------------------------------------------------------------------------------------------------------------------------------------------------------------------|------------|
| Information sources                     | <a href="#">#9</a>   | Describe all intended information sources (such as electronic databases, contact with study authors, trial registers or other grey literature sources) with planned dates of coverage                                                                     | 11-12      |
| Search strategy                         | <a href="#">#10</a>  | Present draft of search strategy to be used for at least one electronic database, including planned limits, such that it could be repeated                                                                                                                | Appendix B |
| Study records - data management         | <a href="#">#11a</a> | Describe the mechanism(s) that will be used to manage records and data throughout the review                                                                                                                                                              | 12         |
| Study records - selection process       | <a href="#">#11b</a> | State the process that will be used for selecting studies (such as two independent reviewers) through each phase of the review (that is, screening, eligibility and inclusion in meta-analysis)                                                           | 12-14      |
| Study records - data collection process | <a href="#">#11c</a> | Describe planned method of extracting data from reports (such as piloting forms, done independently, in duplicate), any processes for obtaining and confirming data from investigators                                                                    | 15-17      |
| Data items                              | <a href="#">#12</a>  | List and define all variables for which data will be sought (such as PICO items, funding sources), any pre-planned data assumptions and simplifications                                                                                                   | 15-17      |
| Outcomes and prioritization             | <a href="#">#13</a>  | List and define all outcomes for which data will be sought, including prioritization of main and additional outcomes, with rationale                                                                                                                      | 15-17      |
| Risk of bias in individual studies      | <a href="#">#14</a>  | Describe anticipated methods for assessing risk of bias of individual studies, including whether this will be done at the outcome or study level, or both; state how this information will be used in data synthesis                                      | See note 1 |
| Data synthesis                          | <a href="#">#15a</a> | Describe criteria under which study data will be quantitatively synthesised                                                                                                                                                                               | 17-18      |
| Data synthesis                          | <a href="#">#15b</a> | If data are appropriate for quantitative synthesis, describe planned summary measures, methods of handling data and methods of combining data from studies, including any planned exploration of consistency (such as I <sup>2</sup> , Kendall's $\tau$ ) | N/A        |
| Data synthesis                          | <a href="#">#15c</a> | Describe any proposed additional analyses (such as sensitivity or subgroup analyses, meta-regression)                                                                                                                                                     | N/A        |
| Data synthesis                          | <a href="#">#15d</a> | If quantitative synthesis is not appropriate, describe the type of summary planned                                                                                                                                                                        | 17-18      |

## SCOPING REVIEW PROTOCOL

|    |               |                     |                                                     |            |
|----|---------------|---------------------|-----------------------------------------------------|------------|
| 1  |               |                     |                                                     |            |
| 2  |               |                     |                                                     |            |
| 3  | Meta-bias(es) | <a href="#">#16</a> | Specify any planned assessment of meta-bias(es)     | See note 2 |
| 4  |               |                     | (such as publication bias across studies, selective |            |
| 5  |               |                     | reporting within studies)                           |            |
| 6  |               |                     |                                                     |            |
| 7  | Confidence in | <a href="#">#17</a> | Describe how the strength of the body of evidence   | See note 3 |
| 8  | cumulative    |                     | will be assessed (such as GRADE)                    |            |
| 9  | evidence      |                     |                                                     |            |
| 10 |               |                     |                                                     |            |

---

**Author notes**

1. N/A for scoping reviews
2. N/A for scoping reviews
3. N/A for scoping reviews

Citation: Moher D, Shamseer L, Clarke M, Ghersi D, Liberati A, Petticrew M, Shekelle P, Stewart LA. Preferred Reporting Items for Systematic Review and Meta-Analysis Protocols (PRISMA-P) 2015 statement. Syst Rev. 2015;4(1):1.

The PRISMA-P elaboration and explanation paper is distributed under the terms of the Creative Commons Attribution License CC-BY. This checklist can be completed online using <https://www.goodreports.org/>, a tool made by the [EQUATOR Network](#) in collaboration with [Penelope.ai](#)



SCOPING REVIEW PROTOCOL

Appendix B

Medline Database Search Strategy

| Search line # | PCC conceptual term of interest     | Search term entered into OVID-Medline                                                                                                                                                                                                                                                                                                                                                                                                                                                                                                                                                                                                                                                                                                                                                                                                                                                                                                                                                                                                                                                                                                                                                      |
|---------------|-------------------------------------|--------------------------------------------------------------------------------------------------------------------------------------------------------------------------------------------------------------------------------------------------------------------------------------------------------------------------------------------------------------------------------------------------------------------------------------------------------------------------------------------------------------------------------------------------------------------------------------------------------------------------------------------------------------------------------------------------------------------------------------------------------------------------------------------------------------------------------------------------------------------------------------------------------------------------------------------------------------------------------------------------------------------------------------------------------------------------------------------------------------------------------------------------------------------------------------------|
| 1             | Population (Transition-age youth)   | exp Adolescent/ or exp Young Adult/                                                                                                                                                                                                                                                                                                                                                                                                                                                                                                                                                                                                                                                                                                                                                                                                                                                                                                                                                                                                                                                                                                                                                        |
| 2             | Population (Transition-age youth)   | (youth* or transition age youth* or teen* or adolescen* or emerging adult* or young adult* or early adult* or young person* or young people* or juvenile*).tw,kf.                                                                                                                                                                                                                                                                                                                                                                                                                                                                                                                                                                                                                                                                                                                                                                                                                                                                                                                                                                                                                          |
| 3             | Population (Serious mental illness) | exp Mental Disorders/ or exp Anxiety Disorders/ or exp "Bipolar and Related Disorders"/ or exp Dissociative Disorders/ or exp "Feeding and Eating Disorders"/ or exp Mood Disorders/ or exp "Attention Deficit and Disruptive Behavior Disorders"/ or exp Personality Disorders/ or exp Schizophrenia/ or exp Psychotic Disorders/ or exp Affective Disorders, Psychotic/ or exp Capgras Syndrome/ or exp Delusional Parasitosis/ or exp Morgellons Disease/ or exp Paranoid Disorders/ or exp Somatoform Disorders/ or exp "Trauma and Stressor Related Disorders"/ or exp Mentally Ill Persons/                                                                                                                                                                                                                                                                                                                                                                                                                                                                                                                                                                                          |
| 4             | Population (Serious mental illness) | (mental disorder* or mental illness* or psychiatric disabilit* or psychiatric disorder* or psychiatric diagnosis* or serious emotional disturbance* or severe emotional disturbance* or "mental health condition*" or anxiety disorder* or phobia* or phobic disorder* or panic disorder* or obsessive-compulsive disorder* or OCD or bipolar disorder* or manic disorder* or manic depression or dissociative disorder* or multiple-personality disorder or eating disorder* or anorexi* or bulimi* or binge eating* or "eating disorder not otherwise specified" or EDNOS or "other specified feeding or eating disorder" or OSFED or disordered eating or mood disorder* or depressive disorder* or affective disorder* or depression or cyclothymic disorder* or cyclothymia or dysthymic disorder* or dysthymia or personality disorder* or schizophrenia spectrum disorder* or schizophrenia or psychotic disorder* or psychosis or psychoses or schizoaffective disorder* or psychotic affective disorder* or paranoid disorder* or somatoform disorder* or body dysmorphic disorder* or body dysmorphi* or post-traumatic stress disorder* or adjustment disorder* or PTSD).tw,kf. |
| 5             | Concept (Resilience)                | exp Resilience, Psychological/                                                                                                                                                                                                                                                                                                                                                                                                                                                                                                                                                                                                                                                                                                                                                                                                                                                                                                                                                                                                                                                                                                                                                             |
| 6             | Concept (Resilience)                | (resilienc*).tw,kf.                                                                                                                                                                                                                                                                                                                                                                                                                                                                                                                                                                                                                                                                                                                                                                                                                                                                                                                                                                                                                                                                                                                                                                        |
| 7             |                                     | 1 or 2                                                                                                                                                                                                                                                                                                                                                                                                                                                                                                                                                                                                                                                                                                                                                                                                                                                                                                                                                                                                                                                                                                                                                                                     |
| 8             |                                     | 3 or 4                                                                                                                                                                                                                                                                                                                                                                                                                                                                                                                                                                                                                                                                                                                                                                                                                                                                                                                                                                                                                                                                                                                                                                                     |
| 9             |                                     | 5 or 6                                                                                                                                                                                                                                                                                                                                                                                                                                                                                                                                                                                                                                                                                                                                                                                                                                                                                                                                                                                                                                                                                                                                                                                     |
| 10            |                                     | 7 and 8 and 9                                                                                                                                                                                                                                                                                                                                                                                                                                                                                                                                                                                                                                                                                                                                                                                                                                                                                                                                                                                                                                                                                                                                                                              |
| 11            |                                     | limit 10 to (english language and humans and yr="2000 - Current")                                                                                                                                                                                                                                                                                                                                                                                                                                                                                                                                                                                                                                                                                                                                                                                                                                                                                                                                                                                                                                                                                                                          |

## SCOPING REVIEW PROTOCOL

## Embase Database Search Strategy

| Search line # | PCC conceptual term of interest     | Search term entered into OVID-Embase                                                                                                                                                                                                                                                                                                                                                                                                                                                                                                                                                                                                                                                                                                                                                                                                                                                                                                                                                                                                                                                                                                                                                       |
|---------------|-------------------------------------|--------------------------------------------------------------------------------------------------------------------------------------------------------------------------------------------------------------------------------------------------------------------------------------------------------------------------------------------------------------------------------------------------------------------------------------------------------------------------------------------------------------------------------------------------------------------------------------------------------------------------------------------------------------------------------------------------------------------------------------------------------------------------------------------------------------------------------------------------------------------------------------------------------------------------------------------------------------------------------------------------------------------------------------------------------------------------------------------------------------------------------------------------------------------------------------------|
| 1             | Population (Transition-age youth)   | exp Adolescent/ or exp Young Adult/                                                                                                                                                                                                                                                                                                                                                                                                                                                                                                                                                                                                                                                                                                                                                                                                                                                                                                                                                                                                                                                                                                                                                        |
| 2             | Population (Transition-age youth)   | (youth* or transition age youth* or teen* or adolescen* or emerging adult* or young adult* or early adult* or young person* or young people* or juvenile*).tw,kf.                                                                                                                                                                                                                                                                                                                                                                                                                                                                                                                                                                                                                                                                                                                                                                                                                                                                                                                                                                                                                          |
| 3             | Population (Serious mental illness) | exp Mental Disease/ or exp Anxiety Disorder/ or exp Bipolar Disorder/ or exp Dissociative Disorder/ or exp Eating Disorder/ or exp Emotional Disorder/ or exp Mood Disorder/ or exp Attention Deficit Disorder/ or exp Impulse Control Disorder/ or exp Neurosis/ or exp Personality Disorder/ or exp Schizophrenia Spectrum Disorder/ or exp Schizophrenia/ or exp Psychosis/ or exp Somatoform Disorder/ or exp Posttraumatic Stress Disorder/                                                                                                                                                                                                                                                                                                                                                                                                                                                                                                                                                                                                                                                                                                                                           |
| 4             | Population (Serious mental illness) | (mental disorder* or mental illness* or psychiatric disabilit* or psychiatric disorder* or psychiatric diagnosis* or serious emotional disturbance* or severe emotional disturbance* or "mental health condition*" or anxiety disorder* or phobia* or phobic disorder* or panic disorder* or obsessive-compulsive disorder* or OCD or bipolar disorder* or manic disorder* or manic depression or dissociative disorder* or multiple-personality disorder or eating disorder* or anorexi* or bulimi* or binge eating* or "eating disorder not otherwise specified" or EDNOS or "other specified feeding or eating disorder" or OSFED or disordered eating or mood disorder* or depressive disorder* or affective disorder* or depression or cyclothymic disorder* or cyclothymia or dysthymic disorder* or dysthymia or personality disorder* or schizophrenia spectrum disorder* or schizophrenia or psychotic disorder* or psychosis or psychoses or schizoaffective disorder* or psychotic affective disorder* or paranoid disorder* or somatoform disorder* or body dysmorphic disorder* or body dysmorphi* or post-traumatic stress disorder* or adjustment disorder* or PTSD).tw,kf. |
| 5             | Concept (Resilience)                | exp Psychological Resilience/                                                                                                                                                                                                                                                                                                                                                                                                                                                                                                                                                                                                                                                                                                                                                                                                                                                                                                                                                                                                                                                                                                                                                              |
| 6             | Concept (Resilience)                | (resilienc*).tw,kf.                                                                                                                                                                                                                                                                                                                                                                                                                                                                                                                                                                                                                                                                                                                                                                                                                                                                                                                                                                                                                                                                                                                                                                        |
| 7             |                                     | 1 or 2                                                                                                                                                                                                                                                                                                                                                                                                                                                                                                                                                                                                                                                                                                                                                                                                                                                                                                                                                                                                                                                                                                                                                                                     |
| 8             |                                     | 3 or 4                                                                                                                                                                                                                                                                                                                                                                                                                                                                                                                                                                                                                                                                                                                                                                                                                                                                                                                                                                                                                                                                                                                                                                                     |
| 9             |                                     | 5 or 6                                                                                                                                                                                                                                                                                                                                                                                                                                                                                                                                                                                                                                                                                                                                                                                                                                                                                                                                                                                                                                                                                                                                                                                     |
| 10            |                                     | 7 and 8 and 9                                                                                                                                                                                                                                                                                                                                                                                                                                                                                                                                                                                                                                                                                                                                                                                                                                                                                                                                                                                                                                                                                                                                                                              |
| 11            |                                     | limit 10 to (english language and humans and yr="2000 - Current")                                                                                                                                                                                                                                                                                                                                                                                                                                                                                                                                                                                                                                                                                                                                                                                                                                                                                                                                                                                                                                                                                                                          |

SCOPING REVIEW PROTOCOL

PsychINFO Database Search Strategy

| Search line # | PCC conceptual term of interest     | Search term entered into OVID-PsychINFO                                                                                                                                                                                                                                                                                                                                                                                                                                                                                                                                                                                                                                                                                                                                                                                                                                                                                                                                                                                                                                                                                                                                                 |
|---------------|-------------------------------------|-----------------------------------------------------------------------------------------------------------------------------------------------------------------------------------------------------------------------------------------------------------------------------------------------------------------------------------------------------------------------------------------------------------------------------------------------------------------------------------------------------------------------------------------------------------------------------------------------------------------------------------------------------------------------------------------------------------------------------------------------------------------------------------------------------------------------------------------------------------------------------------------------------------------------------------------------------------------------------------------------------------------------------------------------------------------------------------------------------------------------------------------------------------------------------------------|
| 1             | Population (Transition-age youth)   | exp Emerging Adulthood/ or exp Early Adolescence/                                                                                                                                                                                                                                                                                                                                                                                                                                                                                                                                                                                                                                                                                                                                                                                                                                                                                                                                                                                                                                                                                                                                       |
| 2             | Population (Transition-age youth)   | (youth* or transition age youth* or teen* or adolescen* or emerging adult* or young adult* or early adult* or young person* or young people* or juvenile*).tw.                                                                                                                                                                                                                                                                                                                                                                                                                                                                                                                                                                                                                                                                                                                                                                                                                                                                                                                                                                                                                          |
| 3             | Population (Serious mental illness) | exp Mental Disorders/ or exp Chronic Mental Illness or exp Serious Mental Illness/ or exp Affective Disorders or exp Anxiety Disorders/ or exp Attention Deficit Disorder/ or exp Bipolar Disorder/ or exp Dissociative Disorders/ or exp Disruptive Behavior Disorders/ or exp Eating Disorders/ or exp Personality Disorders/ or exp Psychosis/ or exp Schizophrenia/ or exp Somatoform Disorders/ or exp "Stress and Trauma Related Disorders"/                                                                                                                                                                                                                                                                                                                                                                                                                                                                                                                                                                                                                                                                                                                                      |
| 4             | Population (Serious mental illness) | (mental disorder* or mental illness* or psychiatric disabilit* or psychiatric disorder* or psychiatric diagnosis* or serious emotional disturbance* or severe emotional disturbance* or "mental health condition*" or anxiety disorder* or phobia* or phobic disorder* or panic disorder* or obsessive-compulsive disorder* or OCD or bipolar disorder* or manic disorder* or manic depression or dissociative disorder* or multiple-personality disorder or eating disorder* or anorexi* or bulimi* or binge eating* or "eating disorder not otherwise specified" or EDNOS or "other specified feeding or eating disorder" or OSFED or disordered eating or mood disorder* or depressive disorder* or affective disorder* or depression or cyclothymic disorder* or cyclothymia or dysthymic disorder* or dysthymia or personality disorder* or schizophrenia spectrum disorder* or schizophrenia or psychotic disorder* or psychosis or psychoses or schizoaffective disorder* or psychotic affective disorder* or paranoid disorder* or somatoform disorder* or body dysmorphic disorder* or body dysmorphi* or post-traumatic stress disorder* or adjustment disorder* or PTSD).tw. |
| 5             | Concept (Resilience)                | exp "Resilience (Psychological)"/                                                                                                                                                                                                                                                                                                                                                                                                                                                                                                                                                                                                                                                                                                                                                                                                                                                                                                                                                                                                                                                                                                                                                       |
| 6             | Concept (Resilience)                | (resilienc*).tw.                                                                                                                                                                                                                                                                                                                                                                                                                                                                                                                                                                                                                                                                                                                                                                                                                                                                                                                                                                                                                                                                                                                                                                        |
| 7             |                                     | 1 or 2                                                                                                                                                                                                                                                                                                                                                                                                                                                                                                                                                                                                                                                                                                                                                                                                                                                                                                                                                                                                                                                                                                                                                                                  |
| 8             |                                     | 3 or 4                                                                                                                                                                                                                                                                                                                                                                                                                                                                                                                                                                                                                                                                                                                                                                                                                                                                                                                                                                                                                                                                                                                                                                                  |
| 9             |                                     | 5 or 6                                                                                                                                                                                                                                                                                                                                                                                                                                                                                                                                                                                                                                                                                                                                                                                                                                                                                                                                                                                                                                                                                                                                                                                  |
| 10            |                                     | 7 and 8 and 9                                                                                                                                                                                                                                                                                                                                                                                                                                                                                                                                                                                                                                                                                                                                                                                                                                                                                                                                                                                                                                                                                                                                                                           |
| 11            |                                     | limit 10 to (english language and humans and yr="2000 - Current")                                                                                                                                                                                                                                                                                                                                                                                                                                                                                                                                                                                                                                                                                                                                                                                                                                                                                                                                                                                                                                                                                                                       |

## SCOPING REVIEW PROTOCOL

## AMED Database Search Strategy

| Search line # | PCC conceptual term of interest     | Search term entered into OVID-AMED                                                                                                                                                                                                                                                                                                                                                                                                                                                                                                                                                                                                                                                                                                                                                                                                                                                                                                                                                                                                                                                                                                                                                         |
|---------------|-------------------------------------|--------------------------------------------------------------------------------------------------------------------------------------------------------------------------------------------------------------------------------------------------------------------------------------------------------------------------------------------------------------------------------------------------------------------------------------------------------------------------------------------------------------------------------------------------------------------------------------------------------------------------------------------------------------------------------------------------------------------------------------------------------------------------------------------------------------------------------------------------------------------------------------------------------------------------------------------------------------------------------------------------------------------------------------------------------------------------------------------------------------------------------------------------------------------------------------------|
| 1             | Population (Transition-age youth)   | exp Adolescent/                                                                                                                                                                                                                                                                                                                                                                                                                                                                                                                                                                                                                                                                                                                                                                                                                                                                                                                                                                                                                                                                                                                                                                            |
| 2             | Population (Transition-age youth)   | (youth* or transition age youth* or teen* or adolescen* or emerging adult* or young adult* or early adult* or young person* or young people* or juvenile*).tw,et.                                                                                                                                                                                                                                                                                                                                                                                                                                                                                                                                                                                                                                                                                                                                                                                                                                                                                                                                                                                                                          |
| 3             | Population (Serious mental illness) | exp Mental Disorders/ or exp Adjustment Disorders/ or exp Affective Disorders/ or exp Affective Disorders Psychotic/ or exp Bipolar Disorder/ or exp Manic Disorder/ or exp Depressive Disorder/ or exp Mood Disorders/ or exp Anxiety Disorders/ or exp Obsessive Compulsive Disorder/ or exp Phobic Disorders/ or exp Stress Disorders Post Traumatic/ or exp Attention Deficit Disorder with Hyperactivity or exp Child Behavior Disorders/ or exp Dissociative Disorders/ or exp Multiple Personality Disorder/ or exp Eating Disorders/ or exp Anorexia Nervosa/ or exp Bulimia/ or exp Neurotic Disorders/ or exp Personality Disorders/ or exp Borderline Personality Disorder/ or exp Hysteria/ or exp Psychotic Disorders/ or exp Schizophrenia/ or exp Somatoform Disorders/ or exp Conversion Disorder/                                                                                                                                                                                                                                                                                                                                                                         |
| 4             | Population (Serious mental illness) | (mental disorder* or mental illness* or psychiatric disabilit* or psychiatric disorder* or psychiatric diagnosis* or serious emotional disturbance* or severe emotional disturbance* or "mental health condition*" or anxiety disorder* or phobia* or phobic disorder* or panic disorder* or obsessive-compulsive disorder* or OCD or bipolar disorder* or manic disorder* or manic depression or dissociative disorder* or multiple-personality disorder or eating disorder* or anorexi* or bulimi* or binge eating* or "eating disorder not otherwise specified" or EDNOS or "other specified feeding or eating disorder" or OSFED or disordered eating or mood disorder* or depressive disorder* or affective disorder* or depression or cyclothymic disorder* or cyclothymia or dysthymic disorder* or dysthymia or personality disorder* or schizophrenia spectrum disorder* or schizophrenia or psychotic disorder* or psychosis or psychoses or schizoaffective disorder* or psychotic affective disorder* or paranoid disorder* or somatoform disorder* or body dysmorphic disorder* or body dysmorphi* or post-traumatic stress disorder* or adjustment disorder* or PTSD).tw,et. |
| 5             | Concept (Resilience)                | exp Adaptation Psychological/                                                                                                                                                                                                                                                                                                                                                                                                                                                                                                                                                                                                                                                                                                                                                                                                                                                                                                                                                                                                                                                                                                                                                              |
| 6             | Concept (Resilience)                | (resilienc*).tw,et.                                                                                                                                                                                                                                                                                                                                                                                                                                                                                                                                                                                                                                                                                                                                                                                                                                                                                                                                                                                                                                                                                                                                                                        |
| 7             |                                     | 1 or 2                                                                                                                                                                                                                                                                                                                                                                                                                                                                                                                                                                                                                                                                                                                                                                                                                                                                                                                                                                                                                                                                                                                                                                                     |
| 8             |                                     | 3 or 4                                                                                                                                                                                                                                                                                                                                                                                                                                                                                                                                                                                                                                                                                                                                                                                                                                                                                                                                                                                                                                                                                                                                                                                     |
| 9             |                                     | 5 or 6                                                                                                                                                                                                                                                                                                                                                                                                                                                                                                                                                                                                                                                                                                                                                                                                                                                                                                                                                                                                                                                                                                                                                                                     |
| 10            |                                     | 7 and 8 and 9                                                                                                                                                                                                                                                                                                                                                                                                                                                                                                                                                                                                                                                                                                                                                                                                                                                                                                                                                                                                                                                                                                                                                                              |
| 11            |                                     | limit 10 to (english and yr="2000 -Current")                                                                                                                                                                                                                                                                                                                                                                                                                                                                                                                                                                                                                                                                                                                                                                                                                                                                                                                                                                                                                                                                                                                                               |

SCOPING REVIEW PROTOCOL

CINHAL Database Search Strategy

| Search line # | PCC conceptual term of interest     | Search term entered into CINHAL (EBSCO)                                                                                                                                                                                                                                                                                                                                                                                                                                                                                                                                                                                                                                                                                                                                                                                                                                                                                                                                                                                                                                                                                                                                                                                                                                                                                                                                                                                                                                                                                                                        |
|---------------|-------------------------------------|----------------------------------------------------------------------------------------------------------------------------------------------------------------------------------------------------------------------------------------------------------------------------------------------------------------------------------------------------------------------------------------------------------------------------------------------------------------------------------------------------------------------------------------------------------------------------------------------------------------------------------------------------------------------------------------------------------------------------------------------------------------------------------------------------------------------------------------------------------------------------------------------------------------------------------------------------------------------------------------------------------------------------------------------------------------------------------------------------------------------------------------------------------------------------------------------------------------------------------------------------------------------------------------------------------------------------------------------------------------------------------------------------------------------------------------------------------------------------------------------------------------------------------------------------------------|
| 1             | Population (Transition-age youth)   | (MH "Adolescence+") OR (MH "Young Adult")                                                                                                                                                                                                                                                                                                                                                                                                                                                                                                                                                                                                                                                                                                                                                                                                                                                                                                                                                                                                                                                                                                                                                                                                                                                                                                                                                                                                                                                                                                                      |
| 2             | Population (Transition-age youth)   | TI (youth* or "transition age youth*" or teen* or adolescen* or "emerging adult*" or "young adult*" or "early adult*" or "young person*" or "young people*" or juvenile*) OR AB (youth* or "transition age youth*" or teen* or adolescen* or "emerging adult*" or "young adult*" or "early adult*" or "young person*" or "young people*" or juvenile*)                                                                                                                                                                                                                                                                                                                                                                                                                                                                                                                                                                                                                                                                                                                                                                                                                                                                                                                                                                                                                                                                                                                                                                                                         |
| 3             | Population (Serious mental illness) | (MH "Mental Disorders+") or (MH "Mental Disorders, Chronic") or (MH "Neurotic Disorders+") or (MH "Affective Disorders+") or (MH "Seasonal Affective Disorder") or (MH "Depression+") or (MH "Anxiety Disorders+") or (MH "Social Anxiety Disorders") or (MH "Generalized Anxiety Disorder") or (MH "Panic Disorder") or (MH "Obsessive-Compulsive Disorder+") or (MH "Phobic Disorders+") or (MH "Stress Disorders, Post-Traumatic+") or (MH "Psychotic Disorders+") or (MH "Schizophrenia+") or (MH "Affective Disorders, Psychotic+") or (MH "Bipolar Disorders+") or (MH "Dissociative Disorders+") or (MH "Multiple-Personality Disorder") or (MH "Personality Disorders+") or (MH "Adjustment Disorders+") or (MH "Attention Deficit Hyperactivity Disorder") or (MH "Child Behavior Disorders+") or (MH "Eating Disorders+") or (MH "Binge Eating Disorder") or (MH "Avoidant Restrictive Food Intake Disorder") or (MH "Bulimia Nervosa") or (MH "Bulimia") or (MH "Anorexia Nervosa") or (MH "Anorexia") or (MH "Somatoform Disorders+") or (MH "Body Dysmorphic Disorder")                                                                                                                                                                                                                                                                                                                                                                                                                                                                           |
| 4             | Population (Serious mental illness) | TI ("mental disorder*" or "mental illness*" or "psychiatric disabilit*" or "psychiatric disorder*" or "psychiatric diagnosis*" or "serious emotional disturbance*" or "severe emotional disturbance*" or "mental health condition*" or "anxiety disorder*" or phobia* or "phobic disorder*" or "panic disorder*" or "obsessive-compulsive disorder*" or OCD or "bipolar disorder*" or "manic disorder*" or "manic depression" or "dissociative disorder*" or "multiple-personality disorder" or "eating disorder*" or anorexi* or bulimi* or "binge eating*" or "eating disorder not otherwise specified" or EDNOS or "other specified feeding or eating disorder" or OSFED or "disordered eating" or "mood disorder*" or "depressive disorder*" or "affective disorder*" or depression or "cyclothymic disorder*" or cyclothymia or "dysthymic disorder*" or dysthymia or "personality disorder*" or "schizophrenia spectrum disorder*" or schizophrenia or "psychotic disorder*" or psychosis or psychoses or "schizoaffective disorder*" or "psychotic affective disorder*" or "paranoid disorder*" or "somatoform disorder*" or "body dysmorphic disorder*" or "body dysmorphi*" or "post-traumatic stress disorder*" or "adjustment disorder*" or PTSD) OR AB ("mental disorder*" or "mental illness*" or "psychiatric disabilit*" or "psychiatric disorder*" or "psychiatric diagnosis*" or "serious emotional disturbance*" or "severe emotional disturbance*" or "mental health condition*" or "anxiety disorder*" or phobia* or "phobic disorder*" or |

## SCOPING REVIEW PROTOCOL

|    |                      |                                                                                                                                                                                                                                                                                                                                                                                                                                                                                                                                                                                                                                                                                                                                                                                                                                                                                                                                                               |
|----|----------------------|---------------------------------------------------------------------------------------------------------------------------------------------------------------------------------------------------------------------------------------------------------------------------------------------------------------------------------------------------------------------------------------------------------------------------------------------------------------------------------------------------------------------------------------------------------------------------------------------------------------------------------------------------------------------------------------------------------------------------------------------------------------------------------------------------------------------------------------------------------------------------------------------------------------------------------------------------------------|
|    |                      | “panic disorder*” or “obsessive-compulsive disorder*” or OCD or “bipolar disorder*” or “manic disorder*” or “manic depression” or “dissociative disorder*” or “multiple-personality disorder” or “eating disorder*” or anorexi* or bulimi* or “binge eating*” or “eating disorder not otherwise specified” or EDNOS or “other specified feeding or eating disorder” or OSFED or “disordered eating” or “mood disorder*” or “depressive disorder*” or “affective disorder*” or depression or “cyclothymic disorder*” or cyclothymia or “dysthymic disorder*” or dysthymia or “personality disorder*” or “schizophrenia spectrum disorder*” or schizophrenia or “psychotic disorder*” or psychosis or psychoses or “schizoaffective disorder*” or “psychotic affective disorder*” or “paranoid disorder*” or “somatoform disorder*” or “body dysmorphic disorder*” or “body dysmorphi*” or “post-traumatic stress disorder*” or “adjustment disorder*” or PTSD) |
| 5  | Concept (Resilience) | (MH “Hardiness”)                                                                                                                                                                                                                                                                                                                                                                                                                                                                                                                                                                                                                                                                                                                                                                                                                                                                                                                                              |
| 6  | Concept (Resilience) | TI (resilienc*) OR AB (resilienc*)                                                                                                                                                                                                                                                                                                                                                                                                                                                                                                                                                                                                                                                                                                                                                                                                                                                                                                                            |
| 7  |                      | 1 or 2                                                                                                                                                                                                                                                                                                                                                                                                                                                                                                                                                                                                                                                                                                                                                                                                                                                                                                                                                        |
| 8  |                      | 3 or 4                                                                                                                                                                                                                                                                                                                                                                                                                                                                                                                                                                                                                                                                                                                                                                                                                                                                                                                                                        |
| 9  |                      | 5 or 6                                                                                                                                                                                                                                                                                                                                                                                                                                                                                                                                                                                                                                                                                                                                                                                                                                                                                                                                                        |
| 10 |                      | 7 and 8 and 9                                                                                                                                                                                                                                                                                                                                                                                                                                                                                                                                                                                                                                                                                                                                                                                                                                                                                                                                                 |
| 11 |                      | limit 10 to (english language and humans and yr="2000 - Current")                                                                                                                                                                                                                                                                                                                                                                                                                                                                                                                                                                                                                                                                                                                                                                                                                                                                                             |

SCOPING REVIEW PROTOCOL

Scopus Database Search Strategy

| Search line # | PCC conceptual term of interest     | Search term entered into Scopus                                                                                                                                                                                                                                                                                                                                                                                                                                                                                                                                                                                                                                                                                                                                                                                                                                                                                                                                                                                                                                                                                                                                                                                                                                         |
|---------------|-------------------------------------|-------------------------------------------------------------------------------------------------------------------------------------------------------------------------------------------------------------------------------------------------------------------------------------------------------------------------------------------------------------------------------------------------------------------------------------------------------------------------------------------------------------------------------------------------------------------------------------------------------------------------------------------------------------------------------------------------------------------------------------------------------------------------------------------------------------------------------------------------------------------------------------------------------------------------------------------------------------------------------------------------------------------------------------------------------------------------------------------------------------------------------------------------------------------------------------------------------------------------------------------------------------------------|
| 1             | Population (Transition-age youth)   | TITLE-ABS-KEY (youth* or "transition age youth*" or teen* or adolescen* or "emerging adult*" or "young adult*" or "early adult*" or "young person*" or "young people*" or juvenile*)                                                                                                                                                                                                                                                                                                                                                                                                                                                                                                                                                                                                                                                                                                                                                                                                                                                                                                                                                                                                                                                                                    |
| 2             | Population (Serious mental illness) | TITLE-ABS-KEY ("mental disorder*" or "mental illness*" or "psychiatric disabilit*" or "psychiatric disorder*" or "psychiatric diagnosis*" or "serious emotional disturbance*" or "severe emotional disturbance*" or "mental health condition*" or "anxiety disorder*" or phobia* or "phobic disorder*" or "panic disorder*" or "obsessive-compulsive disorder*" or OCD or "bipolar disorder*" or "manic disorder*" or "manic depression" or "dissociative disorder*" or "multiple-personality disorder" or "eating disorder*" or anorexi* or bulimi* or "binge eating*" or "eating disorder not otherwise specified" or EDNOS or "other specified feeding or eating disorder" or OSFED or "disordered eating" or "mood disorder*" or "depressive disorder*" or "affective disorder*" or depression or "cyclothymic disorder*" or cyclothymia or "dysthymic disorder*" or dysthymia or "personality disorder*" or "schizophrenia spectrum disorder*" or schizophrenia or "psychotic disorder*" or psychosis or psychoses or "schizoaffective disorder*" or "psychotic affective disorder*" or "paranoid disorder*" or "somatoform disorder*" or "body dysmorphic disorder*" or "body dysmorphi*" or "post-traumatic stress disorder*" or "adjustment disorder*" or PTSD) |
| 3             | Concept (Resilience)                | TITLE-ABS-KEY (resilienc*)                                                                                                                                                                                                                                                                                                                                                                                                                                                                                                                                                                                                                                                                                                                                                                                                                                                                                                                                                                                                                                                                                                                                                                                                                                              |
| 4             |                                     | 1 and 2 and 3                                                                                                                                                                                                                                                                                                                                                                                                                                                                                                                                                                                                                                                                                                                                                                                                                                                                                                                                                                                                                                                                                                                                                                                                                                                           |
| 5             |                                     | limit 4 to (english language and yr="2000 - Current")                                                                                                                                                                                                                                                                                                                                                                                                                                                                                                                                                                                                                                                                                                                                                                                                                                                                                                                                                                                                                                                                                                                                                                                                                   |

# BMJ Open

## Understanding resilience among transition-age youth with serious mental illness: Protocol for a scoping review

|                                 |                                                                                                                                                                                                                                                                                                                                                                                                                                                                                                                                                                                                                                     |
|---------------------------------|-------------------------------------------------------------------------------------------------------------------------------------------------------------------------------------------------------------------------------------------------------------------------------------------------------------------------------------------------------------------------------------------------------------------------------------------------------------------------------------------------------------------------------------------------------------------------------------------------------------------------------------|
| Journal:                        | <i>BMJ Open</i>                                                                                                                                                                                                                                                                                                                                                                                                                                                                                                                                                                                                                     |
| Manuscript ID                   | bmjopen-2021-059826.R2                                                                                                                                                                                                                                                                                                                                                                                                                                                                                                                                                                                                              |
| Article Type:                   | Protocol                                                                                                                                                                                                                                                                                                                                                                                                                                                                                                                                                                                                                            |
| Date Submitted by the Author:   | 29-Jun-2022                                                                                                                                                                                                                                                                                                                                                                                                                                                                                                                                                                                                                         |
| Complete List of Authors:       | Nesbitt, Amy; University of Toronto, Rehabilitation Sciences Institute Sabiston, Catherine; University of Toronto, Faculty of Kinesiology and Physical Education<br>deJonge, Melissa; University of Toronto, Faculty of Kinesiology and Physical Education<br>Barbic, Skye; The University of British Columbia, Occupational Science and Occupational Therapy; Foundry<br>Kozloff, Nicole; Centre for Addiction and Mental Health; University of Toronto, Department of Psychiatry<br>Nalder, Emily; University of Toronto, Occupational Science and Occupational Therapy; University of Toronto, Rehabilitation Sciences Institute |
| <b>Primary Subject Heading</b>: | Mental health                                                                                                                                                                                                                                                                                                                                                                                                                                                                                                                                                                                                                       |
| Secondary Subject Heading:      | Health services research                                                                                                                                                                                                                                                                                                                                                                                                                                                                                                                                                                                                            |
| Keywords:                       | MENTAL HEALTH, PSYCHIATRY, PUBLIC HEALTH                                                                                                                                                                                                                                                                                                                                                                                                                                                                                                                                                                                            |
|                                 |                                                                                                                                                                                                                                                                                                                                                                                                                                                                                                                                                                                                                                     |

SCHOLARONE™  
Manuscripts



## SCOPING REVIEW PROTOCOL

1  
2  
3 1 **Understanding resilience among transition-age youth with serious mental illness: Protocol**  
4  
5 2  
6 **for a scoping review**

7  
8 3 Amy E. Nesbitt, MSc (amy.nesbitt@mail.utoronto.ca)<sup>a\*</sup>  
9

10 4 Catherine M. Sabiston, PhD (catherine.sabiston@utoronto.ca)<sup>b</sup>  
11

12 5 Melissa L. deJonge, MSc (melissa.dejonge@utoronto.ca)<sup>b</sup>  
13

14 6 Skye Barbic, PhD (skye.barbic@ubc.ca)<sup>c,d</sup>  
15

16 7 Nicole Kozloff, MD, SM (nicole.kozloff@camh.ca)<sup>e</sup>  
17

18 8 Emily Nalder, PhD (emily.nalder@utoronto.ca)<sup>a,f</sup>  
19  
20  
21

22 9 <sup>a</sup> Rehabilitation Sciences Institute, University of Toronto (500 University Avenue, Toronto, ON,  
23 Canada, M5G 1V7)  
24

25 11 <sup>b</sup> Faculty of Kinesiology and Physical Education, University of Toronto (55 Harbord Street,  
26 Toronto, ON, Canada, M5S 2W6)  
27

28 13 <sup>c</sup> Department of Occupational Science and Occupational Therapy, University of British  
29 Columbia (T325 - 2211 Wesbrook Mall, Vancouver, BC, Canada, V6T 2B5)  
30

31 15 <sup>d</sup> Foundry (Vancouver, BC, Canada)  
32

33 16 <sup>e</sup> Centre for Addiction and Mental Health (250 College Street, Toronto, ON, Canada, M5T 1R8)  
34

35 17 <sup>f</sup> Department of Occupational Science and Occupational Therapy, University of Toronto (500  
36 University Avenue, Toronto, ON, Canada, M5G 1V7)  
37

38 19 \*Corresponding author: Amy E. Nesbitt, MSc, OT Reg. (Ont.). Rehabilitation Sciences Institute,  
39 University of Toronto, 500 University Avenue, Toronto, ON, Canada, M5G 1V7. Phone: 416-  
40 978-5837. Fax: 416-971-2118. Email: amy.nesbitt@mail.utoronto.ca  
41  
42  
43

44 23 **Keywords:** adolescent, young adult, resilience, mental health, review  
45

46 24 **Word Count:** 4949  
47  
48  
49  
50  
51  
52  
53  
54  
55  
56  
57  
58  
59  
60

## SCOPING REVIEW PROTOCOL

1        **Understanding resilience among transition-age youth with serious mental illness: Protocol**  
2  
3  
4  
5        **for a scoping review**  
6

7  
8        **Abstract**  
9

10    **Introduction:** Transition-age youth (16-29 years old) are disproportionately affected by the  
11    onset, impact and burden of serious mental illness (SMI; e.g., depression, bipolar disorder,  
12    schizophrenia spectrum disorders). Emerging evidence has increasingly highlighted the concept  
13    of resilience in mental health promotion and treatment approaches for this population. A  
14    comprehensive synthesis of existing evidence is needed to enhance conceptual clarity in this  
15    area, identify knowledge gaps, and inform future research and practice. As such, the present  
16    scoping review is guided by the following questions: How has resilience been conceptualized  
17    and operationalized in the transition-age youth mental health literature? What factors influence  
18    resilience among transition-age youth with SMI, and what outcomes have been studied within  
19    the context of transition-age youth's mental health recovery?  
20  
21    **Methods and analysis:** The present protocol will follow six key stages, in accordance with  
22    Arksey and O'Malley's (2005) established scoping review methodology and recent iterations of  
23    this framework, and has been registered with Open Science Framework (<https://osf.io/rzfc5>). The  
24    protocol and review process will be carried out by a multidisciplinary team in consultation with  
25    community stakeholders. A comprehensive search strategy will be conducted across multiple  
26    electronic databases to identify relevant empirical literature. Included sources will address the  
27    population of transition-age youth (16-29 years) diagnosed with SMI, the concept of resilience  
28    (in any context), and will report original research written in English. Data screening and  
29    extraction will be completed by at least two independent reviewers. Following meta-narrative  
30  
31  
32  
33  
34  
35  
36  
37  
38  
39  
40  
41  
42  
43  
44  
45  
46  
47  
48  
49  
50  
51  
52  
53  
54  
55  
56  
57  
58  
59  
60

## SCOPING REVIEW PROTOCOL

1 review and qualitative content analyses, findings will be synthesized as a descriptive overview  
2  
3 with tabular and graphical summaries.

4 **Ethics and dissemination:** Institutional research ethics board approval was obtained to complete  
5 the community stakeholder consultation stage of this review. Results will be disseminated  
6 through conference presentations, publications, and user-friendly reports and graphics.

### Strengths and limitations of this study

- This scoping review study will follow recent recommendations and guidance documents to promote methodological rigor and has been registered to enhance transparency.
- Variability in how the population (transition-age youth) and concept (resilience) have been defined, as well as restrictions to the search strategy based on language, date, and publication type may limit the breadth of the search.
- An assessment of the methodological quality of included studies will not be conducted which limits the types of conclusions and implications that can be drawn from the review.
- We will apply an iterative and team-based approach, in consultation with community stakeholders (transition-age youth with SMI, clinicians, researchers) to improve the applicability and dissemination of results.

## SCOPING REVIEW PROTOCOL

**Introduction**

Transition-age youth (16-29 years old) are the highest risk age group for onset of serious mental illness (SMI; mental illnesses that cause substantial functional impairment, e.g., depression, bipolar disorder, schizophrenia spectrum disorders), the single most disabling group of disorders worldwide (1,2). The experience of mental illness for young people is unique, in that it arises during a critical period of psychosocial development, identity formation, and many complex life transitions (3,4). Access to supportive treatment and relationships, social marginalization, and stigma continue to influence the course and severity of mental illness for transition-age youth (5). Indeed, SMI can negatively impact one's overall physical health, quality of life, and engagement in meaningful life roles and activities, including academics, employment, and social relationships (1,4,6,7). Further, the experience of chronic and persistent symptoms of mental illness can contribute to suicide risk, which is the second leading cause of death among individuals 15-29 years old globally (8,9). Despite the increased risk and burden of SMI among transition-age youth, this age group faces many barriers in accessing service and supports, as they transition out of youth services and into the adult mental health and addiction services sector (10,11). As such, the identification of factors that contribute to transition-age youth's mental health recovery and early intervention are now recognized as priority areas within national and global mental health strategies and guidelines (11–14).

Of particular interest, researchers and clinicians have emphasized the importance of promoting *resilience* in transition-age youth's mental health recovery. Most definitions of resilience refer to positive adaptation in the face of significant adversity as a central or defining feature. However, there are many different ways of conceptualizing resilience (e.g., as a trait, outcome, or dynamic process) (15,16), which has led to some ambiguity in how resilience is

## SCOPING REVIEW PROTOCOL

1 defined and understood across different research disciplines and perspectives (17,18). For  
2  
3  
4  
5  
6  
7  
8  
9  
10  
11  
12  
13  
14  
15  
16  
17  
18  
19  
20  
21  
22  
23  
24  
25  
26  
27  
28  
29  
30  
31  
32  
33  
34  
35  
36  
37  
38  
39  
40  
41  
42  
43  
44  
45  
46  
47  
48  
49  
50  
51  
52  
53  
54  
55  
56  
57  
58  
59  
60

1 defined and understood across different research disciplines and perspectives (17,18). For  
2 example, many authors have conceptualized and discussed resilience as an outcome resulting  
3 from changes made at the individual level, or in relation to positive personal attributes (e.g.,  
4 hope, self-efficacy, coping) (19,20). This aligns with early definitions of resilience as an  
5 exceptional personal quality or trait, that an individual either has or does not have, which will  
6 determine their capacity to both endure incredibly stressful life events and continue on a path  
7 towards full functional and emotional recovery (15,21,22). Conceptualizations of resilience as a  
8 personal trait or outcome have been criticized in recent research as this does not recognize the  
9 critical role of one's environment and available resources (17,23).

10 In more contemporary and holistic conceptions, "resilience has come to be seen less in  
11 terms of static characteristics within the individual and more as a dynamic and multi-faceted  
12 family of processes that evolve over time" (p. 234) (24). To illustrate, resilience has been  
13 conceptualized as a dynamic process, involving one's personal characteristics, environment, and  
14 support networks, that influence how an individual "bounces back" from challenging  
15 circumstances (e.g., onset of mental illness) (16–18,25). This also acknowledges the integral role  
16 of not only the individual, but the social and ecological systems that influence resilience (26,27).  
17 For example, Wathen and colleagues (2012) offer the following definition further contextualized  
18 to the field of trauma and mental health: "Resilience is a dynamic process in which  
19 psychological, social, environmental and biological factors interact to enable an individual at any  
20 stage of life to develop, maintain, or regain their mental health despite exposure to adversity" (p.  
21 10) (28). Through this lens, resilience is seen as fluid (rather than a fixed or pre-determined  
22 trait), arising through multiple pathways that lead to positive indices of flourishing and  
23 functioning (29). Taken together, processes of resilience are shaped by the complex interplay

## SCOPING REVIEW PROTOCOL

1 between individual experiences of stress / adversity, multimodal “*resilience factors*” (e.g., risks,  
2 internal and external protective factors, self-regulatory strategies), as well as one’s adaptation  
3 and other resilience-related outcomes (25,30).

4 This process-oriented perspective of resilience has gained increased attention in mental  
5 health and rehabilitation sciences research over the past two decades (19,29), and has aligned  
6 with the paradigm shift towards recovery models of mental health and the growing popularity  
7 and application of positive psychology principles in psychiatry (31). Indeed, resilience research  
8 and recovery models of mental health share an orientation towards understanding the processes  
9 that underly individual experiences (embedded within one’s sociocultural context / environment)  
10 and emphasize the importance of hope, meaning, engagement, and life satisfaction in one’s  
11 recovery (32–34). Recent conceptual models (35) and interventions (36,37) focused on youth-  
12 specific and integrated mental health services also highlight resilience as an important aspect to  
13 the recovery process. Additionally, adopting a resilience perspective aligns with more strengths-  
14 based and transdiagnostic approaches which aim to better understand processes of recovery  
15 relevant to a broader range of adolescent and young adult mental health service users (38).  
16 Researchers have begun to uncover resilience factors across and beyond specific diagnoses,  
17 which can be targeted in interventions to promote positive development, functioning, and well-  
18 being (26,29,30,39). As such, the study of resilience among transition-age youth with SMI can  
19 inform developments in recovery-oriented approaches to service delivery and warrants further  
20 exploration.

21 In sum, emerging evidence and frameworks of resilience provide a unique lens to  
22 understanding mental health among transition-age youth, with the capacity to recognize  
23 individuals’ strengths, and move beyond the common focus on illness, deficits and problems in

## SCOPING REVIEW PROTOCOL

1 rehabilitation sciences (35). However, researchers have not yet developed a theoretical  
2 framework or model of resilience tailored to the unique experiences of transition-age youth who  
3 are diagnosed with SMI to guide research and practice (19). In addition, conceptualizations of  
4 resilience vary across the scientific literature, which directly impacts how the concept of  
5 resilience is understood, operationalized and applied within this context. This is important to  
6 address as discrepancies across definitions of resilience may limit measurement, study  
7 comparisons, and current understandings of resiliency-informed care approaches in research and  
8 clinical practice (23). A comprehensive synthesis of existing evidence will enhance conceptual  
9 clarity in this area, identify factors and outcomes that are relevant to transition-age youth's  
10 resilience, and inform future work.

### **Objectives**

12 The overarching purpose of the present scoping review is to synthesize and describe the  
13 breadth of scientific literature on resilience among transition-age youth diagnosed with SMI,  
14 identify current knowledge gaps, and recommend key areas for future resilience research among  
15 this population. Specifically, this scoping review will explore how the concept of resilience has  
16 been conceptualized and operationalized in the transition-age youth mental health literature, and  
17 identify resilience factors and outcomes that have been studied within the context of transition-  
18 age youth's mental health recovery (e.g., adversity, risks, internal and external protective factors,  
19 self-regulatory strategies, adaptation and resilience-related outcomes). The focus of this review  
20 will be on conceptualizations of resilience from a process-oriented perspective (rather than as a  
21 personal trait or outcome).

### **Methods and Analysis**

## SCOPING REVIEW PROTOCOL

1 A scoping review design was selected based on the exploratory nature of the proposed  
2 research question and the current focus on clarifying the concept of resilience. Particularly, a  
3 scoping review design allows for a comprehensive summary of knowledge, inclusive of more  
4 broad study objectives and methodologies, and is thus recommended for gaining conceptual  
5 clarity and identifying key knowledge gaps (40,41).

6 The scoping review protocol will follow the methodological stages outlined by Arksey  
7 and O'Malley (2005), and extended by Levac and colleagues (2010), including: i) identifying the  
8 research question, ii) identifying relevant studies, iii) study selection, iv) charting the data, v)  
9 collating, summarizing, and reporting the results, and vi) stakeholder consultation (42,43).

10 Throughout the review process, an iterative and reflexive approach will be used in order to refine  
11 the initial protocol as needed in consultation with a community stakeholder group (involving  
12 researchers, clinicians, and transition-age youth with SMI) (42,43). Recent guidance documents  
13 (44) and best practices for conducting and reporting scoping reviews (PRISMA-ScR) (45) will  
14 also be applied to promote methodological rigor and transparency. The PRISMA-P checklist (46)  
15 can be found in Appendix A (online supplementary). The current protocol has been registered  
16 through Open Science Framework (<https://osf.io/rzfc5>), and will be conducted over a one-year  
17 timeframe (December 2021 to November 2022).

### 18 **Stage 1: Identifying the Research Question**

19 This scoping review aims to explore the extent and breadth of the current scientific  
20 literature on resilience among transition-age youth diagnosed with SMI. Specifically, the review  
21 will address two research questions: (1) How has resilience been conceptualized and  
22 operationalized (i.e., defined and measured) in the transition-age youth mental health literature?  
23 (2) What factors influence resilience among transition-age youth with SMI, and what outcomes



## SCOPING REVIEW PROTOCOL

1 have been studied within the context of transition-age youth's mental health recovery? The  
2 research questions have been broadly framed using the PCC mnemonic to address the *population*  
3 of transition-age youth diagnosed with SMI and the *concept* of resilience within any *context* of  
4 one's mental health recovery (41). Each component is further clarified below, in accordance with  
5 the Joanna Briggs Institute scoping review manual (44).

6 **Population.** For the present review, the population is defined as "transition-age youth",  
7 including adolescents and young adults between the ages of 16 and 29 years old, who are  
8 entering adulthood and have been diagnosed with SMI. It is important to note that definitions of  
9 "youth", "adolescents", and "young adults" differ across various cultures and settings, and are  
10 thus highly mixed within the scholarly literature. In order to be inclusive of the most common  
11 European/United Nations/WHO definitions of this age group and reflective of current mental  
12 health service models, the present review will include studies with participants spanning middle  
13 adolescence (age 15) to the "upper limit" of young adulthood (age 36) if the target population is  
14 clearly defined as "transition-age youth" (3,14,47–50). Additionally, serious mental illness  
15 (SMI) is defined as "a mental, behavioral, or emotional disorder resulting in serious functional  
16 impairment, which substantially interferes with or limits one or more major life activities", such  
17 as one's interpersonal relationships, self-care, employment, or recreation (51,52). Definitions of  
18 SMI exclude dementias, developmental disorders, and substance use disorders, as well as mental  
19 disorders due to a general medical condition (52). Examples of mental health conditions that may  
20 meet criteria for SMI include: major depressive disorders, bipolar disorders, borderline  
21 personality disorder, anxiety disorders, eating disorders and schizophrenia spectrum disorders  
22 (51,52). Among youth and adolescents (under age 18) the same definition and examples are  
23 applied but also occasionally termed "serious emotional disturbance" (SED), rather than SMI

## SCOPING REVIEW PROTOCOL

(52,53). Studies with participants experiencing co-morbid disorders which are not the primary focus will also be included in this scoping review.

**Concept.** While definitions of resilience vary across different research disciplines, most definitions refer to positive adaptation in the face of significant challenge, risk or adversity as central or defining features, and acknowledge the importance of sociocultural factors in shaping experiences and understandings of resilience (19). For the purpose of this scoping review, resilience is defined as a dynamic process that unfolds over time, involving multiple resilience factors that interact to enable individuals to negotiate or recover from stressful life events / adversity (e.g., one's personal characteristics, environment and support networks). Studies that adopt this process-oriented perspective will be included, and the following core elements of resilience and resilience factors will be explored: adversity, risks, internal and external protective factors, self-regulatory strategies, adaptation and resilience-related outcomes (25,30). Studies that focus solely on a trait perspective of resilience, similar constructs (e.g., ego-resilience, psychological capital) or biological / genetic / neurophysiological factors will be omitted. Lastly, given our focus on psychological resilience at the person- or individual-level, studies evaluating family- or community-level resilience will not be included.

**Context.** While "clinical recovery" is often defined as a reduction in SMI symptoms or impairment (typically in clinical / health care settings), "personal recovery" refers to the processes that contribute to transition-age youth's hope, development, and engagement in meaningful activities (even while facing SMI) and emphasizes the importance of multiple contexts where this occurs (e.g., spanning personal, familial, social and institutional environments) (35). The present review considers mental health recovery primarily through a personal recovery lens, and will thus explore transition-age youth's resilience in any context of

## SCOPING REVIEW PROTOCOL

1 their mental health recovery, which may include individual, community, and health-oriented  
2 settings (among others).

### 3 **Stage 2: Identifying Relevant Literature**

4 **Information source.** To comprehensively review the existing evidence and knowledge  
5 base related to resilience in the field of transition-age youth mental health, empirical sources will  
6 be considered, including original research / primary studies. Specifically, six electronic databases  
7 of value to the fields of psychology, health and rehabilitation sciences will be searched to  
8 identify relevant empirical studies: MEDLINE (Ovid), EMBASE (Ovid), PsycINFO, AMED,  
9 CINAHL, and Scopus. To enhance the comprehensiveness of the search, relevant journals and  
10 the reference list of included sources and similar reviews will be manually searched.

11 **Search strategy.** The search terms and search strategy will be developed by the  
12 multidisciplinary review team, in consultation with a health sciences librarian at the University  
13 of Toronto. Importantly, keywords have been carefully selected to best capture the complex and  
14 evolving terminology used to describe the population and concept reflected in our research  
15 question. As mentioned, terms to describe the age group of transition-age youth are highly  
16 variable and inconsistent within the literature (e.g., subject headings / keywords may be inclusive  
17 of youth / teenagers / adolescents / emerging adults / adults etc.). Clinical and lay language to  
18 describe SMI diagnoses have also evolved over time, with “severe and persistent mental illness”  
19 and “chronic mental illness” often cited (52). Further, as reflected in the research aims, there is  
20 currently no consensus on the definition of resilience and conceptualizations differ based on the  
21 context or academic discipline applied (19). To overcome these challenges in the development  
22 and execution of our search, we will utilize the following techniques: i) a multi-step search  
23 process to ensure relevant sources are not missed (an initial limited search strategy favoring

## SCOPING REVIEW PROTOCOL

1 sensitivity over precision will be conducted first and inform potential revisions making the  
2 search strategy more precise); ii) use of Yale MeSH analyzer for piloting; and iii) ongoing expert  
3 consultation. Additionally, the search strategy will undergo peer review to enhance its feasibility  
4 and rigor (e.g., CADTH Peer Review Checklist for Search Strategies) (54).

5 The preliminary search strategy and list of keywords have been developed using  
6 MEDLINE (Ovid) and adapted to each database (see Appendix B online supplementary). The  
7 search strategy will explore specified search terms within subject headings, titles, abstracts and  
8 keywords. Search terms will be combined using appropriate Boolean logic and operators (e.g.,  
9 ‘and’, ‘or’, ‘not’).

### 10 **Stage 3: Study Selection**

11 Study selection will follow a collaborative and iterative screening process among the  
12 review team using Covidence systematic review software (55) and pre-determined eligibility  
13 criteria (42,43). All search results will be exported to Covidence for data management and to  
14 remove duplicates. At least two independent reviewers (authors AN and MD) will complete  
15 screening in two stages for i) title/abstract and ii) full-text review. The reviewers will complete a  
16 calibration exercise using a sample of 10 references to pilot inclusion / exclusion criteria and  
17 compare decisions (e.g., include / exclude / uncertain). Formal title/abstract screening will  
18 commence when 80% agreement is achieved and will involve regular meetings among reviewers  
19 to discuss any challenges or uncertainties. Upon completion of stage 1, full-text references will  
20 be obtained and independently screened by the same two reviewers. The same strategy will be  
21 applied to stage 2 full-text screening, including piloting (calibration exercise for 10 references)  
22 and regular discussion. At each stage, reviewer (inter-rater) agreement will be reported.

## SCOPING REVIEW PROTOCOL

1 Disagreements will be resolved by consensus or by the decision of a third reviewer (senior  
2 authors EN and CS).

3 Included sources will address the population of transition-age youth diagnosed with SMI,  
4 the concept of resilience (in any context), and will contain original peer reviewed research  
5 written in English. Specific language restrictions were made for feasibility purposes.  
6 Additionally, the publishing date was limited to the years 2000 to 2022 as this is the time period  
7 where a significant rise in resilience research emerged within mental health and rehabilitation  
8 sciences (19,29,56). The prioritisation, implementation and evaluation of mental health services  
9 specifically tailored to transition-age youth (e.g., early intervention programs) also mainly took  
10 root after the year 2000 (13,47,57). Further inclusion / exclusion criteria for the two-stage  
11 screening are detailed below.

**Eligibility for Stage 1 Title/Abstract Review:**

12 **Inclusion criteria.** a) Population: Refers to transition-age youth diagnosed or living with  
13 SMI (as defined previously). b) Concept: Resilience / resiliency is identified as a key focus  
14 within the purpose / objectives / research question, outcome measure, and/or findings. c)  
15 Context: Is set in any individual, community or health-oriented context of mental health  
16 recovery. d) Type of source: Peer reviewed original research (quantitative, qualitative, mixed  
17 method). e) Publication language / date: Written in English and published between 2000 and  
18 2022.

19 **Exclusion criteria.** a) Population: Refers to non-clinical population, general population,  
20 children / youth (age 0-14), or childhood developmental disorder. b) Concept: Resilience /  
21 resiliency is not an explicit focus. c) Type of source: Peer reviewed articles with the primary aim  
22 of developing, reporting or validating the psychometric properties of survey measures /  
23

## SCOPING REVIEW PROTOCOL

1 instruments, study protocols, review articles (e.g., systematic/scoping reviews, meta-analyses),  
2 books / book chapters, and grey literature (e.g., editorials, commentaries / reports, clinical  
3 guidelines, conference proceedings, and theses / dissertations). d) Publication language / date:  
4 Written in another language than English and published before January 1, 2000.

### 5 *Eligibility for Stage 2 Full-text Review:*

6 ***Inclusion criteria.*** a) Population: Clearly defined clinical population in accordance with  
7 either: participant self-reported history of SMI; clinician confirmed diagnosis of SMI; or DSM-V  
8 / ICD-10 system diagnostic criteria. b) Concept: Must explicitly define / operationalize the  
9 concept of resilience from a process-oriented perspective and focus on individual-level  
10 resilience.

11 ***Exclusion criteria.*** a) Population: Mixed samples whereby transition-age youth with SMI  
12 are encompassed within broader age groups or the general population (without the stratification  
13 of results / reporting). b) Concept: Trait resilience, other psychological constructs that are similar  
14 or connected to resilience / resiliency (e.g., psychological capital, hardiness, grit, general indices  
15 of subjective well-being), family- or community-level resilience, or biological / genetic /  
16 neurophysiological factors are identified as the sole / primary focus or outcome.

17 While criteria were developed to maintain a broad scope of selected studies, our hope is  
18 that stringent inclusion / exclusion criteria will eliminate sources that only include the concept of  
19 resilience as an opinion, recommendation, vague interpretation, or buzzword – as this will not  
20 aid in enhancing conceptual clarity in this research area. As such, these broad eligibility criteria  
21 may undergo further refinement to ensure that selected sources capture the full breadth of  
22 knowledge available related to resilience among young people with SMI.

### 23 **Stage 4: Data Extraction**

## SCOPING REVIEW PROTOCOL

1           Following recommended data charting methods (42,43), a standardized and systematic  
2  
3           1           Following recommended data charting methods (42,43), a standardized and systematic  
4  
5           2           charting form (Table 1) will be used to organize and interpret relevant details from the selected  
6  
7           3           sources in line with our research question and objectives. The following information will be  
8  
9           4           charted in Excel: i) general document details, ii) key characteristics of empirical studies (e.g.,  
10  
11           5           research design, methods, intervention details, youth engagement, intersectional approaches,  
12  
13           6           study population, context), iii) how resilience was conceptualized and operationalized (e.g.,  
14  
15           7           definition, theoretical framework / model, academic discipline, measures), and iv) resilience  
16  
17           8           factors and outcomes identified.  
18  
19

20  
21           9           The preliminary chart form was also developed in accordance with Greenhalgh and  
22  
23           10           colleagues' (2005) meta-narrative approach (58). Specifically, this meta-narrative approach was  
24  
25           11           originally created to detail how a field of study or key concept has evolved over time and to  
26  
27           12           explore potential tensions that exist across research traditions (or "paradigms") within  
28  
29           13           knowledge syntheses (58). A meta-narrative approach is recommended when examining  
30  
31           14           complex, heterogeneous bodies of literature where a key concept of interest has been  
32  
33           15           conceptualized and investigated through different research traditions, and conceptual clarity is  
34  
35           16           needed (58). According to Greenhalgh et al. (2005), a *research tradition* refers to a paradigm of  
36  
37           17           inquiry, undertaken by researchers, that shares four key interrelated dimensions (conceptual,  
38  
39           18           theoretical, methodological, instrumental), and thus shows distinct disciplinary roots, scope and  
40  
41           19           key concepts (58). Research traditions are often characterized and influenced by seminal  
42  
43           20           conceptual papers that inform the direction and focus of future work (58). Alternatively, an  
44  
45           21           *academic discipline* is defined as a broader field of study or branch of knowledge (e.g.,  
46  
47           22           sociology, psychology, medicine) (58).  
48  
49  
50  
51  
52  
53  
54  
55  
56  
57  
58  
59  
60

## SCOPING REVIEW PROTOCOL

1 Data extraction will be a collaborative and iterative process among the review team to  
 2 ensure that key characteristics, definitions, themes and strengths/limitations are captured. A  
 3 calibration exercise using a sample of 5 studies will be completed by two reviewers to pilot the  
 4 chart form. When agreement of at least 80% is achieved, the two independent reviewers (authors  
 5 AN and MD) will complete the remaining formal data charting procedures for all references. The  
 6 charting form will be revised as needed based on stakeholder feedback. Consensus will be  
 7 reached through discussion or final decision by a third reviewer (senior authors EN and CS) if  
 8 necessary. Any challenges in the organization / categorization of data at this stage will be  
 9 brought to the four content experts on this protocol (CS, SB, NK, EN), each of whom have over  
 10 10 years of research and/or clinical experience in young adult mental health and resiliency.

11 *Table 1. Draft charting form*

|                                                        |                                                                                                                                                                                                 |
|--------------------------------------------------------|-------------------------------------------------------------------------------------------------------------------------------------------------------------------------------------------------|
| General document details                               |                                                                                                                                                                                                 |
| APA citation                                           | Full author, date and journal details.                                                                                                                                                          |
| Country and location                                   | Country of publication (and location if provided).                                                                                                                                              |
| Study characteristics                                  |                                                                                                                                                                                                 |
| Study purpose                                          | Purpose, research question(s), aim(s), and/or objective(s) of the study.                                                                                                                        |
| Study population and sample size                       | Age range, SMI (clinical diagnosis / self-reported; stage of illness), relevant demographic characteristics. Number of participants.                                                            |
| Study design and methods                               | Quantitative, qualitative, or mixed methods. Main experimental, observational or qualitative methods used.                                                                                      |
|                                                        | Intervention (if applicable): Description of key characteristics (e.g., intervention purpose / target, type, main components, duration)                                                         |
|                                                        | Youth engagement (if applicable): Extent to which youth with SMI were engaged through aspects of the research process.                                                                          |
|                                                        | Intersectional approaches (if applicable): Description of recruitment procedures, theoretical frameworks, and analyses addressing diversity and intersecting social identities of participants. |
| Context                                                | The setting of the research if provided (e.g., community, health-oriented, specific treatment / program).                                                                                       |
| Conceptualization and operationalization of resilience |                                                                                                                                                                                                 |



## SCOPING REVIEW PROTOCOL

|                                        |                                                                                                                                           |
|----------------------------------------|-------------------------------------------------------------------------------------------------------------------------------------------|
| Conceptualization                      | How was resilience described from a process-oriented perspective?                                                                         |
| Definition of resilience               | Definition or operationalization of resilience.                                                                                           |
| Theoretical framework/model            | Theory, conceptual model(s) or framework(s) applied.                                                                                      |
| Seminal papers referenced              | Overarching paradigm and seminal conceptual papers that have informed the research (if applicable).                                       |
| Instruments used to measure resilience | Specific measures / surveys employed (if applicable).                                                                                     |
| Academic discipline                    | Broad field of research or practice.                                                                                                      |
| Resilience factors and outcomes        |                                                                                                                                           |
| Adversity / risks                      | Personal or environmental risk factors identified (if applicable).                                                                        |
| Internal / external protective factors | Personal or environmental protective factors identified (if applicable).                                                                  |
| Self-regulatory strategies             | Strategies identified to self-manage mood, emotions, thoughts, and/or behaviors (if applicable).                                          |
| Study outcomes                         | Any outcomes that were measured or described. Description of positive change, resilience-related outcomes, or adaptation (if applicable). |
| Important results                      | Description of main findings and implications.                                                                                            |

**Stage 5: Collating, Summarizing, and Reporting the Results**

The PRISMA-ScR Checklist will guide the presentation of results in the final report (45). This will include a flow diagram to explicitly detail review decision making processes (45). Data from eligible full-texts will be analyzed and collated using meta-narrative and qualitative content analyses as well as descriptive statistics (e.g., frequencies / counts). Results of this scoping review will be summarized narratively in a descriptive overview (42,43).

Qualitative content analysis will be used to identify, analyze, and report patterns across the included empirical sources to understand how resilience has been conceptualized and operationalized among transition-age youth with SMI. Particularly, definitions, measures, resilience factors and outcomes will be open-coded, and then grouped to generate distinct categories. Aspects of the study population and context of mental health recovery may also be analyzed. The inductive and reflexive coding process will be completed by two reviewers

## SCOPING REVIEW PROTOCOL

1 (authors AN and MD) using Nvivo software. Categories will then be reviewed and discussed  
2 with all members of the multidisciplinary review team (CS, SB, NK, EN) for further refinement.  
3 As guided by Greenhalgh et al. (2005) for meta-narrative review, findings will be organized and  
4 synthesized to map conceptualizations of resilience over time and across different research  
5 traditions (58). Research traditions will be identified through a process of grouping articles that  
6 reflect similar theoretical, methodological and/or instrumental approaches (e.g., seminal papers  
7 cited, how the authors frame the concept of resilience within the study outcomes or  
8 implications). This will allow for easier interpretation of the extent and breadth of the current  
9 literature on resilience among transition-age youth diagnosed with SMI. Particularly,  
10 comparisons and tensions across definitions of resilience may be highlighted according to each  
11 paradigm.

12         Reflexivity will support methodological rigor and transparency by explicitly  
13 acknowledging how the researchers' positionality may influence the motivations and  
14 methodological choices that ultimately shape the review process, interpretations, and results (59–  
15 61). Ongoing reflexive practice will be used to address and challenge researcher biases,  
16 assumptions, and preunderstandings that may influence study decisions and analyses, and to  
17 critically analyze positions of privilege and power in research activities. Detailed notes of our  
18 decision-making processes and justifications will be documented throughout all stages of the  
19 scoping review.

20         For the purpose of the present scoping review, we will use a combination of narrative,  
21 tabular, and graphical summaries to present key findings (42,43). A traditional summary chart  
22 will describe key characteristics of each included source (e.g., author and year of publication,  
23 research tradition, academic discipline, study design, study population, definitions of resilience,

## SCOPING REVIEW PROTOCOL

1 measures, main findings). Resilience factors and outcomes will be summarized in a table or  
2  
3 figure. A creative graphical / visual depiction of identified research traditions and timeframe will  
4  
5 also be used to “map” key findings of the review (58). In sum, the analytic approach has been  
6  
7 developed to facilitate conceptual / theoretical advancements in resilience research, identify key  
8  
9 knowledge gaps, and highlight potential future directions in the study of transition-age youth  
10  
11 resilience and mental health. The presentation and reporting of results (through summaries,  
12  
13 tables, and visuals) will be discussed among the multidisciplinary review team and community  
14  
15 stakeholder group. Consistent input from the perspective of researchers, clinicians, and  
16  
17 transition-age youth with SMI will enhance the relevance and utility of the review findings.  
18  
19  
20  
21  
22  
23

### 10 **Stage 6: Stakeholder Consultation**

11       The overarching goal of the current scoping review is to systematically explore the  
12  
13 current extent and breadth of peer reviewed research on resilience among transition-age youth  
14  
15 diagnosed with SMI. Particularly, efforts have been made within the scoping review  
16  
17 methodology to provide a holistic and coherent overview of evidence that can inform future  
18  
19 research, education, and practice (41–43). In order to achieve these goals, the multidisciplinary  
20  
21 review team has been formed to include knowledgeable stakeholders (researchers, clinicians,  
22  
23 knowledge users) with backgrounds in psychiatry / early intervention services (NK),  
24  
25 occupational therapy / resiliency in rehabilitation sciences (AN, SB, EN), and kinesiology /  
26  
27 young adult mental health programming (MD, CS).

28       Following Levac and colleagues’ (2010) recommendations, this scoping review will also  
29  
30 consult with community stakeholders to gain the perspectives of transition-age youth with lived  
31  
32 experience of SMI, clinicians, and other mental health / resiliency researchers (43). To achieve  
33  
34 Stage 6 of this review, qualitative focus groups will be conducted virtually (using online  
35  
36  
37  
38  
39  
40  
41  
42  
43  
44  
45  
46  
47  
48  
49  
50  
51  
52  
53  
54  
55  
56  
57  
58  
59  
60

## SCOPING REVIEW PROTOCOL

teleconferencing). Community stakeholders will be invited through the review team's current research / practice networks and established partnerships with youth-focused mental health services in Canada. Recruitment materials (emails, e-posters) will share details regarding eligibility, focus group participation, and the letter of informed consent form. Interested participants will provide written informed consent by digitally signing a secure online consent form on the University of Toronto's Research Electronic Data Capture (REDCap) platform.

Consultative meetings will be held at two time points to inform: i) the research methods (Topic Consultation and Input Meeting), and ii) interpretation, reporting and knowledge translation strategies (Reaction Meeting). Following current recommendations for stakeholder consultation (43,62,63) and focus group studies (64,65), up to 3 focus groups (n = 6-10 participants each) will be conducted at each time point. For the Topic Consultation and Input Meeting, community stakeholders will be asked about their perspectives of the review objectives and methods, key areas of focus for data extraction and analysis (e.g., important aspects of transition-age youth resilience to capture within the charting form), and what they would most like to learn from the results of the scoping review. At the time of the Reaction Meeting, community stakeholders will be asked about their impression of key review findings (e.g., how resilience has been defined), whether this resonates with them/their experiences, where gaps/tensions exist that require further investigation, and how this knowledge can be applied to support mental health recovery. This will shape how results are presented and interpreted in the final scoping review paper and guide decision making on knowledge dissemination strategies. We will aim for equal representation among the researchers, clinicians, and young people involved in each focus group. The consent form and group norms will be reviewed with participants at the start of each focus group discussion. Focus groups will be co-facilitated by

## SCOPING REVIEW PROTOCOL

1 two members of the review team (AN, MD) virtually using a semi-structured interview guide.  
2  
3 Audio recordings will be transcribed verbatim to complete directed content analysis (66).  
4  
5 Complete methods and results will be detailed in the final report (including stakeholder group  
6 characteristics, sample size, data collection tools, analysis, and findings) (43). Several  
7 recommendations to enhance the trustworthiness of qualitative content analysis will be employed  
8 (67,68), including: (i) member checking, (ii) clear description of the context and participant  
9 characteristics, (iii) transparent reporting of the coding process and agreement, and (iv) use of  
10 illustrative quotes, as well as frequencies / counts where appropriate, to summarize results.

11  
12 Guided by scoping review practices, stakeholder engagement will promote a more  
13 collaborative approach, emphasize the voices of young people and knowledge users, and  
14 ultimately maximize the potential contribution of the research (43). Particularly, involving  
15 transition-age youth with SMI as part of the review process will facilitate feedback on the  
16 relevance and usefulness of the review findings. This is considered essential for not only  
17 advancing research and practice in youth mental health, but also addressing recent concerns of  
18 the “weaponization” of resiliency in rehabilitation (e.g., adding stress, pressure, or individual  
19 onus to “become resilient” at times of increased vulnerability) by drawing on the values and  
20 perspectives of young people (69–71).

### **Patient and Public Involvement**

21 Patients and members of the public have not been involved in the design of this scoping  
22 review and the protocol development. However, the perspectives of transition-age youth who  
23 have experienced SMI will be gathered during the review process. Their feedback will inform  
24 our methods, interpretation of results, and knowledge dissemination plan.

### **Ethics and Dissemination**

## SCOPING REVIEW PROTOCOL

1 This scoping review study received institutional research ethics board approval to  
2 conduct the community stakeholder input and reaction meetings (stage 6), which involve  
3 collection and analysis of primary data. Results of the review will be disseminated through  
4 traditional approaches, including open-access peer-reviewed publication(s), presentations at 1-2  
5 national/international conferences, and a plain-language summary report. Additional knowledge  
6 translation strategies may be used dependent on community stakeholder feedback to share  
7 findings, key messages and future directions (e.g., infographics, social media).

### Conclusion

8  
9 The distinct impact and burden of SMI among young people has been increasingly  
10 recognized among researchers and clinicians. This has provoked new research and care  
11 approaches centered on building resiliency. Despite a recent surge in examinations of resilience  
12 in the context of transition-age youth mental health recovery, there remains a lack of  
13 understanding on the core meanings, processes and outcomes of resilience among this  
14 population. To our knowledge, this will be the first scoping review to systematically examine  
15 how resilience is conceptualized and operationalized among transition-age youth with SMI, and  
16 explore what resilience factors and outcomes have been studied. A comprehensive synthesis,  
17 developed in collaboration with community stakeholders, is needed to advance research and  
18 clinical practice.

## SCOPING REVIEW PROTOCOL

- 1  
2  
3 1 **Contributorship Statement:** AN led the conceptualization of this review and drafted the  
4  
5 2 protocol manuscript with support from CS, MD, SB, NK, and EN. MD was involved in the  
6  
7 3 review design and refining the search strategy. CS, SB, NK, and EN were also involved in the  
8  
9 4 review design, and the development of the eligibility criteria and data extraction forms. All  
10  
11 5 authors provided feedback on the manuscript and approval for submitting this protocol  
12  
13 6 manuscript for publication.  
14  
15  
16 7 **Competing Interests:** None declared. There are no competing interests for any author.  
17  
18 8 **Funding:** This research received no specific grant from any funding agency in the public,  
19  
20 9 commercial or not-for-profit sectors.  
21  
22  
23 10 **Data Sharing Statement:** No data are associated with this article.  
24  
25  
26 11 **Patient Consent:** Not required.  
27  
28 12 **License Statement:** I, the Submitting Author has the right to grant and does grant on behalf of  
29  
30 13 all authors of the Work (as defined in the below author licence), an exclusive licence and/or a  
31  
32 14 non-exclusive licence for contributions from authors who are: i) UK Crown employees; ii) where  
33  
34 15 BMJ has agreed a CC-BY licence shall apply, and/or iii) in accordance with the terms applicable  
35  
36 16 for US Federal Government officers or employees acting as part of their official duties; on a  
37  
38 17 worldwide, perpetual, irrevocable, royalty-free basis to BMJ Publishing Group Ltd (“BMJ”) its  
39  
40 18 licensees and where the relevant Journal is co-owned by BMJ to the co-owners of the Journal, to  
41  
42 19 publish the Work in BMJ Open and any other BMJ products and to exploit all rights, as set out in  
43  
44 20 our licence.  
45  
46  
47 21 **Acknowledgements:** We would like to acknowledge Julia Martyniuk, Health Sciences Librarian  
48  
49 22 (University of Toronto), for their expertise and assistance in developing the search strategy for  
50  
51 23 this scoping review.  
52  
53  
54  
55  
56  
57  
58  
59  
60

## SCOPING REVIEW PROTOCOL

**References**

1. McGorry P. Transition to adulthood: The critical period for pre-emptive, disease-modifying care for schizophrenia and related disorders. *Schizophr Bull.* 2011 May 1;37(3):524–30.
2. Pearson, C., Janz, T., & Ali J. Mental and substance use disorders in Canada. *Health at a Glance.* Statistics Canada. Catalogue no. 82-624-X. 2013.
3. Arnett JJ, Žukauskienė R, Sugimura K. The new life stage of emerging adulthood at ages 18–29 years: Implications for mental health. *The Lancet Psychiatry.* 2014 Dec;1(7):569–76.
4. Yung, A. R., Cotter, J., & McGorry PD. *Youth Mental Health: Approaches to Emerging Mental Ill-Health in Young People.* Routledge; 2020.
5. Rehm J, Shield KD. Global burden of disease and the impact of mental and addictive disorders. *Curr Psychiatry Rep.* 2019 Feb 7;21(2):10.
6. Fusar-Poli P. Integrated mental health services for the developmental period (0 to 25 Years): A critical review of the evidence. *Front Psychiatry.* 2019 Jun 7;10.
7. Stoep, A. V., Beresford, S. A., Weiss, N. S., McKnight, B., Cauce, A. M., & Cohen P. Community-based study of the transition to adulthood for adolescents with psychiatric disorder. *Am J Epidemiol.* 2000 Aug 15;152(4):352–62.
8. Lozano R, Naghavi M, Foreman K, Lim S, Shibuya K, Aboyans V, et al. Global and regional mortality from 235 causes of death for 20 age groups in 1990 and 2010: A systematic analysis for the Global Burden of Disease Study 2010. *Lancet.* 2012 Dec;380(9859):2095–128.
9. World Health Organization. *Mental health and substance use: Suicide data [Internet].*



## SCOPING REVIEW PROTOCOL

- 1  
2  
3 1 2019. Available from: [https://www.who.int/teams/mental-health-and-substance-use/data-](https://www.who.int/teams/mental-health-and-substance-use/data-research/suicide-data)  
4  
5 2 research/suicide-data  
6  
7  
8 3 10. Burgess PM, Pirkis JE, Slade TN, Johnston AK, Meadows GN, Gunn JM. Service use for  
9  
10 4 mental health problems: Findings from the 2007 National Survey of Mental Health and  
11  
12 5 Wellbeing. *Aust New Zeal J Psychiatry*. 2009 Jul 1;43(7):615–23.  
13  
14 6 11. Mental Health Commission of Canada. Changing directions, changing lives: The mental  
15  
16 7 health strategy for Canada. 2021.  
17  
18 8 12. Ministry of Health and Long-Term Care. Respect, recovery, resilience: Recommendations  
19  
20 9 for Ontario’s mental health & addictions strategy. 2011.  
21  
22 10 13. World Health Organization. Mental health action plan 2013-2020 [Internet]. 2013.  
23  
24 11 Available from: <https://apps.who.int/iris/handle/10665/89966>  
25  
26 12 14. World Health Organization. Guidelines on mental health promotive and preventive  
27  
28 13 interventions for adolescents: Helping adolescents thrive. 2020.  
29  
30 14 15. Fine SB. Resilience and human adaptability: Who rises above adversity? *Am J Occup*  
31  
32 15 *Ther*. 1991 Jun 1;45(6):493–503.  
33  
34 16 16. Masten AS. Ordinary magic: Resilience processes in development. *Am Psychol*.  
35  
36 17 2001;56(3):227–38.  
37  
38 18 17. Luthar SS, Cicchetti D, Becker B. The construct of resilience: A critical evaluation and  
39  
40 19 guidelines for future work. *Child Dev*. 2000 May 28;71(3):543–62.  
41  
42 20 18. Ungar M. *The social ecology of resilience: A handbook of theory and practice*. Springer  
43  
44 21 Science & Business Media; 2011.  
45  
46 22 19. Fletcher D, Sarkar M. Psychological resilience: A review and critique of definitions,  
47  
48 23 concepts, and theory. *Eur Psychol*. 2013 Jan;18(1):12–23.  
49  
50  
51  
52  
53  
54  
55  
56  
57  
58  
59  
60

## SCOPING REVIEW PROTOCOL

- 1 20. Gillespie BM, Chaboyer W, Wallis M. Development of a theoretically derived model of  
2 resilience through concept analysis. *Contemp Nurse*. 2007 May 17;25(1-2):124-35.
- 3 21. Rutten BPF, Hammels C, Geschwind N, Menne-Lothmann C, Pishva E, Schruers K, et al.  
4 Resilience in mental health: Linking psychological and neurobiological perspectives. *Acta*  
5 *Psychiatr Scand*. 2013 Jul 14;128(1):3-20.
- 6 22. Rutter M. Resilience in the face of adversity: Protective factors and resistance to  
7 psychiatric disorder. *Br J Psychiatry*. 1985 Dec 29;147(6):598-611.
- 8 23. Schwarz S. Resilience in psychology: A critical analysis of the concept. *Theory Psychol*.  
9 2018 Aug 29;28(4):528-41.
- 10 24. Van Vliet KJ. Shame and resilience in adulthood: A grounded theory study. *J Couns*  
11 *Psychol*. 2008 Apr;55(2):233-45.
- 12 25. Nalder E, Hartman L, Hunt A, King G. Traumatic brain injury resiliency model: A  
13 conceptual model to guide rehabilitation research and practice. *Disabil Rehabil*. 2019 Oct  
14 23;41(22):2708-17.
- 15 26. Masten AS, Lucke CM, Nelson KM, Stallworthy IC. Resilience in development and  
16 psychopathology: Multisystem perspectives. *Annu Rev Clin Psychol*. 2021 May  
17 7;17(1):521-49.
- 18 27. Ungar M, Theron L. Resilience and mental health: How multisystemic processes  
19 contribute to positive outcomes. *The Lancet Psychiatry*. 2020 May;7(5):441-8.
- 20 28. Wathen CN, MacGregor JC, Hammerton J, Coben JH, Herrman H, Stewart DE, et al.  
21 Priorities for research in child maltreatment, intimate partner violence and resilience to  
22 violence exposures: Results of an international Delphi consensus development process.  
23 *BMC Public Health*. 2012 Dec 21;12(1):684.

## SCOPING REVIEW PROTOCOL

- 1  
2  
3 1 29. Stainton A, Chisholm K, Kaiser N, Rosen M, Upthegrove R, Ruhrmann S, et al.  
4  
5 2 Resilience as a multimodal dynamic process. *Early Interv Psychiatry*. 2019  
6  
7 Aug;13(4):725–32.  
8  
9  
10 4 30. Davydov DM, Stewart R, Ritchie K, Chaudieu I. Resilience and mental health. *Clin*  
11  
12 5 *Psychol Rev*. 2010 Jul;30(5):479–95.  
13  
14 6 31. Schrank B, Brownell T, Tylee A, Slade M. Positive psychology: An approach to  
15  
16 supporting recovery in mental illness. *East Asian Arch Psychiatry*. 2014 Sep;24(3):95–  
17  
18 7 103.  
19  
20 8  
21 9 32. Echezarraga A, Las Hayas C, López de Arroyabe E, Jones SH. Resilience and recovery in  
22  
23 the context of psychological disorders. *J Humanist Psychol*. 2019 May  
24  
25 10 29;002216781985162.  
26  
27 11  
28 12 33. Friesen BJ. Recovery and resilience in children’s mental health: Views from the field.  
29  
30 *Psychiatr Rehabil J*. 2007;31(1):38–48.  
31  
32 13  
33 14 34. Jacob KS. Recovery model of mental illness: A complementary approach to psychiatric  
34  
35 15 care. *Indian J Psychol Med*. 2015 Apr 1;37(2):117–9.  
36  
37 16 35. Rayner S, Thielking M, Lough R. A new paradigm of youth recovery: Implications for  
38  
39 youth mental health service provision. *Aust J Psychol*. 2018 Dec 1;70(4):330–40.  
40  
41 17  
42 18 36. Meyer PS, Gottlieb JD, Penn D, Mueser K, Gingerich S. Individual Resiliency training:  
43  
44 19 An early intervention approach to enhance well-being in people with first-episode  
45  
46 20 psychosis. *Psychiatr Ann*. 2015 Nov;45(11):554–60.  
47  
48 21 37. Oliver KG, Collin P, Burns J, Nicholas J. Building resilience in young people through  
49  
50 meaningful participation. *Aust e-Journal Adv Ment Heal*. 2006 Jan 17;5(1):34–40.  
51  
52 22  
53 23 38. Fusar-Poli P, Solmi M, Brondino N, Davies C, Chae C, Politi P, et al. Transdiagnostic

## SCOPING REVIEW PROTOCOL

- 1 psychiatry: A systematic review. *World Psychiatry*. 2019 Jun 6;18(2):192–207.
- 2
- 3 1
- 4
- 5 2 39. Fritz J, de Graaff AM, Caisley H, van Harmelen A-L, Wilkinson PO. A systematic review
- 6
- 7
- 8 3
- 9
- 10 4
- 11
- 12 40. Colquhoun HL, Levac D, O'Brien KK, Straus S, Tricco AC, Perrier L, et al. Scoping
- 13
- 14
- 15 6
- 16
- 17 7
- 18
- 19 8 41. Munn Z, Peters MDJ, Stern C, Tufanaru C, McArthur A, Aromataris E. Systematic review
- 20
- 21
- 22 9
- 23
- 24 10
- 25
- 26 11 42. Arksey H, O'Malley L. Scoping studies: Towards a methodological framework. *Int J Soc*
- 27
- 28
- 29 12
- 30
- 31 13 43. Levac D, Colquhoun H, O'Brien KK. Scoping studies: Advancing the methodology.
- 32
- 33 14
- 34
- 35 15 44. Peters MDJ, Marnie C, Tricco AC, Pollock D, Munn Z, Alexander L, et al. Updated
- 36
- 37
- 38 16
- 39
- 40 17
- 41
- 42 18 45. Tricco AC, Lillie E, Zarin W, O'Brien KK, Colquhoun H, Levac D, et al. PRISMA
- 43
- 44
- 45 19
- 46
- 47 20
- 48
- 49 21 46. Moher D, Shamseer L, Clarke M, Ghersi D, Liberati A, Petticrew M, et al. Preferred
- 50
- 51
- 52 22
- 53
- 54 23
- 55
- 56
- 57
- 58
- 59
- 60

## SCOPING REVIEW PROTOCOL

- 1 47. McGorry P, Bates T, Birchwood M. Designing youth mental health services for the 21st  
2 century: Examples from Australia, Ireland and the UK. *Br J Psychiatry*. 2013 Jan  
3 2;202(s54):s30–5.
- 4 48. Mueser KT, Penn DL, Addington J, Brunette MF, Gingerich S, Glynn SM, et al. The  
5 NAVIGATE program for first-episode psychosis: Rationale, overview, and description of  
6 psychosocial components. *Psychiatr Serv*. 2015 Jul;66(7):680–90.
- 7 49. Perovic B. Defining youth in contemporary national legal and policy framework across  
8 Europe. Partnership between the European Commission and the Council of Europe in the  
9 field of youth. 2016.
- 10 50. United Nations. Definition of youth [Internet]. 2013. Available from: [http://www.un.org/](http://www.un.org/esa/socdev/documents/youth/fact-sheets/youth-definition.pdf)  
11 [esa/socdev/documents/youth/fact-sheets/youth-definition.pdf](http://www.un.org/esa/socdev/documents/youth/fact-sheets/youth-definition.pdf).
- 12 51. National Institute of Mental Health. Mental illness [Internet]. 2021. Available from:  
13 <https://www.nimh.nih.gov/health/statistics/mental-illness.shtml#:~:text=Serious mental>  
14 [illness \(SMI\) is,or more major life activities](https://www.nimh.nih.gov/health/statistics/mental-illness.shtml#:~:text=Serious mental)
- 15 52. Substance Abuse and Mental Health Services Administration. Behind the term: Serious  
16 mental illness. Development Services Group, Inc. [Internet]. 2016. Available from:  
17 <https://www.hsdl.org/?abstract&did=801613>
- 18 53. Substance Abuse and Mental Health Services Administration. Adults with SMI and  
19 children/youth with SED. U.S. Department of Health and Human Services. 2020;
- 20 54. McGowan J, Sampson M, Salzwedel DM, Cogo E, Foerster V, Lefebvre C. PRESS peer  
21 review of electronic search strategies: 2015 guideline statement. *J Clin Epidemiol*. 2016  
22 Jul;75:40–6.
- 23 55. Veritas Health Innovation. Covidence systematic review software [Internet]. 2021.

## SCOPING REVIEW PROTOCOL

- 1 Available from: [www.covidence.org](http://www.covidence.org)
- 2
- 3 1
- 4
- 5 2 56. Raanaas RK, Bjøntegaard HØ, Shaw L. A scoping review of participatory action research
- 6
- 7 to promote mental health and resilience in youth and adolescents. *Adolesc Res Rev*. 2020
- 8
- 9 Jun 1;5(2):137–52.
- 10
- 11 4
- 12 57. McGorry PD, Mei C. Early intervention in youth mental health: Progress and future
- 13
- 14 directions. *Evid Based Ment Heal*. 2018 Nov;21(4):182–4.
- 15
- 16 6
- 17 58. Greenhalgh T, Robert G, Macfarlane F, Bate P, Kyriakidou O, Peacock R. Storylines of
- 18
- 19 research in diffusion of innovation: A meta-narrative approach to systematic review. *Soc*
- 20
- 21 *Sci Med*. 2005 Jul;61(2):417–30.
- 22
- 23 9
- 24 10 59. Barry CA, Britten N, Barber N, Bradley C, Stevenson F. Using reflexivity to optimize
- 25
- 26 teamwork in qualitative research. *Qual Health Res*. 1999 Jan 1;9(1):26–44.
- 27
- 28 12
- 29 60. Finlay L. Negotiating the swamp: The opportunity and challenge of reflexivity in research
- 30
- 31 practice. *Qual Res*. 2002 Aug 17;2(2):209–30.
- 32
- 33 14
- 34 61. Jacobson D, Mustafa N. Social identity map: A reflexivity tool for practicing explicit
- 35
- 36 positionality in critical qualitative research. *Int J Qual Methods*. 2019 Jan
- 37
- 38 1;18:160940691987007.
- 39
- 40 17
- 41 62. Keown K, Van Eerd D, Irvin E. Stakeholder engagement opportunities in systematic
- 42
- 43 reviews: Knowledge transfer for policy and practice. *J Contin Educ Health Prof*.
- 44
- 45 2008;28(2):67–72.
- 46
- 47 20
- 48 63. Sabiston CM, Vani M, DeJonge M, Nesbitt A. Scoping reviews and rapid reviews. *Int Rev*
- 49
- 50 *Sport Exerc Psychol*. 2022.
- 51
- 52 22
- 53 64. Hennink MM, Kaiser BN, Weber MB. What influences saturation? Estimating sample
- 54
- 55 sizes in focus group research. *Qual Health Res*. 2019;29(10):1483–96.
- 56
- 57
- 58
- 59
- 60

## SCOPING REVIEW PROTOCOL

- 1  
2  
3 1 65. O'Brien K, Wilkins A, Zack E, Solomon P. Scoping the Field: Identifying Key Research  
4  
5 2 Priorities in HIV and Rehabilitation. *AIDS Behav.* 2010 Apr 10;14(2):448–58.  
6  
7 3 66. Hsieh H-F, Shannon SE. Three approaches to qualitative content analysis. *Qual Health*  
8  
9 4 Res. 2005 Nov 1;15(9):1277–88.  
10  
11 5 67. Graneheim U., Lundman B. Qualitative content analysis in nursing research: Concepts,  
12  
13 6 procedures and measures to achieve trustworthiness. *Nurse Educ Today.* 2004  
14  
15 7 Feb;24(2):105–12.  
16  
17 8 68. Elo S, Kääriäinen M, Kanste O, Pölkki T, Utriainen K, Kyngäs H. Qualitative content  
18  
19 9 analysis: A focus on trustworthiness. *SAGE Open.* 2014 Jan 1;4(1):215824401452263.  
20  
21 10 69. Hutcheon E, Lashewicz B. Theorizing resilience: Critiquing and unbounding a  
22  
23 11 marginalizing concept. *Disabil Soc.* 2014 Oct 21;29(9):1383–97.  
24  
25 12 70. McCrae N. The weaponizing of mental health. *J Adv Nurs.* 2019 Apr 24;75(4):709–10.  
26  
27 13 71. Shalanski L, Ewashen C. An interpretive phenomenological study of recovering from  
28  
29 14 mental illness: Teenage girls' portrayals of resilience. *Int J Ment Health Nurs.* 2019 Apr  
30  
31 15 24;28(2):492–500.  
32  
33  
34  
35  
36  
37  
38  
39  
40  
41  
42  
43  
44  
45  
46  
47  
48  
49  
50  
51  
52  
53  
54  
55  
56  
57  
58  
59  
60

## SCOPING REVIEW PROTOCOL

## Appendix A

## PRISMA-P Checklist

|                           |                     | Reporting Item                                                                                                                                                                                                                | Page Number |
|---------------------------|---------------------|-------------------------------------------------------------------------------------------------------------------------------------------------------------------------------------------------------------------------------|-------------|
| <b>Title</b>              |                     |                                                                                                                                                                                                                               |             |
| Identification            | <a href="#">#1a</a> | Identify the report as a protocol of a systematic review                                                                                                                                                                      | 2           |
| Update                    | <a href="#">#1b</a> | If the protocol is for an update of a previous systematic review, identify as such                                                                                                                                            | N/A         |
| <b>Registration</b>       |                     |                                                                                                                                                                                                                               |             |
|                           | <a href="#">#2</a>  | If registered, provide the name of the registry (such as PROSPERO) and registration number                                                                                                                                    | 2, 8        |
| <b>Authors</b>            |                     |                                                                                                                                                                                                                               |             |
| Contact                   | <a href="#">#3a</a> | Provide name, institutional affiliation, e-mail address of all protocol authors; provide physical mailing address of corresponding author                                                                                     | 1           |
| Contribution              | <a href="#">#3b</a> | Describe contributions of protocol authors and identify the guarantor of the review                                                                                                                                           | 1, 23       |
| <b>Amendments</b>         |                     |                                                                                                                                                                                                                               |             |
|                           | <a href="#">#4</a>  | If the protocol represents an amendment of a previously completed or published protocol, identify as such and list changes; otherwise, state plan for documenting important protocol amendments                               | N/A         |
| <b>Support</b>            |                     |                                                                                                                                                                                                                               |             |
| Sources                   | <a href="#">#5a</a> | Indicate sources of financial or other support for the review                                                                                                                                                                 | --          |
| Sponsor                   | <a href="#">#5b</a> | Provide name for the review funder and / or sponsor                                                                                                                                                                           | --          |
| Role of sponsor or funder | <a href="#">#5c</a> | Describe roles of funder(s), sponsor(s), and / or institution(s), if any, in developing the protocol                                                                                                                          | --          |
| <b>Introduction</b>       |                     |                                                                                                                                                                                                                               |             |
| Rationale                 | <a href="#">#6</a>  | Describe the rationale for the review in the context of what is already known                                                                                                                                                 | 4-7         |
| Objectives                | <a href="#">#7</a>  | Provide an explicit statement of the question(s) the review will address with reference to participants, interventions, comparators, and outcomes (PICO)                                                                      | 8-10        |
| <b>Methods</b>            |                     |                                                                                                                                                                                                                               |             |
| Eligibility criteria      | <a href="#">#8</a>  | Specify the study characteristics (such as PICO, study design, setting, time frame) and report characteristics (such as years considered, language, publication status) to be used as criteria for eligibility for the review | 11-14       |



## SCOPING REVIEW PROTOCOL

|    |                    |                      |                                                           |
|----|--------------------|----------------------|-----------------------------------------------------------|
| 1  |                    |                      |                                                           |
| 2  |                    |                      |                                                           |
| 3  | Information        | <a href="#">#9</a>   | Describe all intended information sources (such as        |
| 4  | sources            |                      | electronic databases, contact with study authors, trial   |
| 5  |                    |                      | registers or other grey literature sources) with planned  |
| 6  |                    |                      | dates of coverage                                         |
| 7  |                    |                      |                                                           |
| 8  | Search strategy    | <a href="#">#10</a>  | Present draft of search strategy to be used for at least  |
| 9  |                    |                      | one electronic database, including planned limits,        |
| 10 |                    |                      | such that it could be repeated                            |
| 11 |                    |                      |                                                           |
| 12 | Study records -    | <a href="#">#11a</a> | Describe the mechanism(s) that will be used to            |
| 13 | data management    |                      | manage records and data throughout the review             |
| 14 | Study records -    | <a href="#">#11b</a> | State the process that will be used for selecting         |
| 15 | selection process  |                      | studies (such as two independent reviewers) through       |
| 16 |                    |                      | each phase of the review (that is, screening, eligibility |
| 17 |                    |                      | and inclusion in meta-analysis)                           |
| 18 |                    |                      |                                                           |
| 19 | Study records -    | <a href="#">#11c</a> | Describe planned method of extracting data from           |
| 20 | data collection    |                      | reports (such as piloting forms, done independently,      |
| 21 | process            |                      | in duplicate), any processes for obtaining and            |
| 22 |                    |                      | confirming data from investigators                        |
| 23 |                    |                      |                                                           |
| 24 | Data items         | <a href="#">#12</a>  | List and define all variables for which data will be      |
| 25 |                    |                      | sought (such as PICO items, funding sources), any         |
| 26 |                    |                      | pre-planned data assumptions and simplifications          |
| 27 |                    |                      |                                                           |
| 28 | Outcomes and       | <a href="#">#13</a>  | List and define all outcomes for which data will be       |
| 29 | prioritization     |                      | sought, including prioritization of main and additional   |
| 30 |                    |                      | outcomes, with rationale                                  |
| 31 |                    |                      |                                                           |
| 32 | Risk of bias in    | <a href="#">#14</a>  | Describe anticipated methods for assessing risk of        |
| 33 | individual studies |                      | bias of individual studies, including whether this will   |
| 34 |                    |                      | be done at the outcome or study level, or both; state     |
| 35 |                    |                      | how this information will be used in data synthesis       |
| 36 |                    |                      |                                                           |
| 37 | Data synthesis     | <a href="#">#15a</a> | Describe criteria under which study data will be          |
| 38 |                    |                      | quantitatively synthesised                                |
| 39 |                    |                      |                                                           |
| 40 | Data synthesis     | <a href="#">#15b</a> | If data are appropriate for quantitative synthesis,       |
| 41 |                    |                      | describe planned summary measures, methods of             |
| 42 |                    |                      | handling data and methods of combining data from          |
| 43 |                    |                      | studies, including any planned exploration of             |
| 44 |                    |                      | consistency (such as I <sup>2</sup> , Kendall's $\tau$ )  |
| 45 |                    |                      |                                                           |
| 46 | Data synthesis     | <a href="#">#15c</a> | Describe any proposed additional analyses (such as        |
| 47 |                    |                      | sensitivity or subgroup analyses, meta-regression)        |
| 48 |                    |                      |                                                           |
| 49 | Data synthesis     | <a href="#">#15d</a> | If quantitative synthesis is not appropriate, describe    |
| 50 |                    |                      | the type of summary planned                               |
| 51 |                    |                      |                                                           |
| 52 |                    |                      |                                                           |
| 53 |                    |                      |                                                           |
| 54 |                    |                      |                                                           |
| 55 |                    |                      |                                                           |
| 56 |                    |                      |                                                           |
| 57 |                    |                      |                                                           |
| 58 |                    |                      |                                                           |
| 59 |                    |                      |                                                           |
| 60 |                    |                      |                                                           |

## SCOPING REVIEW PROTOCOL

|    |               |                     |                                                     |            |
|----|---------------|---------------------|-----------------------------------------------------|------------|
| 1  |               |                     |                                                     |            |
| 2  |               |                     |                                                     |            |
| 3  | Meta-bias(es) | <a href="#">#16</a> | Specify any planned assessment of meta-bias(es)     | See note 2 |
| 4  |               |                     | (such as publication bias across studies, selective |            |
| 5  |               |                     | reporting within studies)                           |            |
| 6  |               |                     |                                                     |            |
| 7  | Confidence in | <a href="#">#17</a> | Describe how the strength of the body of evidence   | See note 3 |
| 8  | cumulative    |                     | will be assessed (such as GRADE)                    |            |
| 9  | evidence      |                     |                                                     |            |
| 10 |               |                     |                                                     |            |

---

**Author notes**

1. N/A for scoping reviews
2. N/A for scoping reviews
3. N/A for scoping reviews

Citation: Moher D, Shamseer L, Clarke M, Ghersi D, Liberati A, Petticrew M, Shekelle P, Stewart LA. Preferred Reporting Items for Systematic Review and Meta-Analysis Protocols (PRISMA-P) 2015 statement. Syst Rev. 2015;4(1):1.

The PRISMA-P elaboration and explanation paper is distributed under the terms of the Creative Commons Attribution License CC-BY. This checklist can be completed online using <https://www.goodreports.org/>, a tool made by the [EQUATOR Network](#) in collaboration with [Penelope.ai](#)

SCOPING REVIEW PROTOCOL

Appendix B

Medline Database Search Strategy

| Search line # | PCC conceptual term of interest     | Search term entered into OVID-Medline                                                                                                                                                                                                                                                                                                                                                                                                                                                                                                                                                                                                                                                                                                                                                                                                                                                                                                                                                                                                                                                                                                                                                      |
|---------------|-------------------------------------|--------------------------------------------------------------------------------------------------------------------------------------------------------------------------------------------------------------------------------------------------------------------------------------------------------------------------------------------------------------------------------------------------------------------------------------------------------------------------------------------------------------------------------------------------------------------------------------------------------------------------------------------------------------------------------------------------------------------------------------------------------------------------------------------------------------------------------------------------------------------------------------------------------------------------------------------------------------------------------------------------------------------------------------------------------------------------------------------------------------------------------------------------------------------------------------------|
| 1             | Population (Transition-age youth)   | exp Adolescent/ or exp Young Adult/                                                                                                                                                                                                                                                                                                                                                                                                                                                                                                                                                                                                                                                                                                                                                                                                                                                                                                                                                                                                                                                                                                                                                        |
| 2             | Population (Transition-age youth)   | (youth* or transition age youth* or teen* or adolescen* or emerging adult* or young adult* or early adult* or young person* or young people* or juvenile*).tw,kf.                                                                                                                                                                                                                                                                                                                                                                                                                                                                                                                                                                                                                                                                                                                                                                                                                                                                                                                                                                                                                          |
| 3             | Population (Serious mental illness) | exp Mental Disorders/ or exp Anxiety Disorders/ or exp "Bipolar and Related Disorders"/ or exp Dissociative Disorders/ or exp "Feeding and Eating Disorders"/ or exp Mood Disorders/ or exp "Attention Deficit and Disruptive Behavior Disorders"/ or exp Personality Disorders/ or exp Schizophrenia/ or exp Psychotic Disorders/ or exp Affective Disorders, Psychotic/ or exp Capgras Syndrome/ or exp Delusional Parasitosis/ or exp Morgellons Disease/ or exp Paranoid Disorders/ or exp Somatoform Disorders/ or exp "Trauma and Stressor Related Disorders"/ or exp Mentally Ill Persons/                                                                                                                                                                                                                                                                                                                                                                                                                                                                                                                                                                                          |
| 4             | Population (Serious mental illness) | (mental disorder* or mental illness* or psychiatric disabilit* or psychiatric disorder* or psychiatric diagnosis* or serious emotional disturbance* or severe emotional disturbance* or "mental health condition*" or anxiety disorder* or phobia* or phobic disorder* or panic disorder* or obsessive-compulsive disorder* or OCD or bipolar disorder* or manic disorder* or manic depression or dissociative disorder* or multiple-personality disorder or eating disorder* or anorexi* or bulimi* or binge eating* or "eating disorder not otherwise specified" or EDNOS or "other specified feeding or eating disorder" or OSFED or disordered eating or mood disorder* or depressive disorder* or affective disorder* or depression or cyclothymic disorder* or cyclothymia or dysthymic disorder* or dysthymia or personality disorder* or schizophrenia spectrum disorder* or schizophrenia or psychotic disorder* or psychosis or psychoses or schizoaffective disorder* or psychotic affective disorder* or paranoid disorder* or somatoform disorder* or body dysmorphic disorder* or body dysmorphi* or post-traumatic stress disorder* or adjustment disorder* or PTSD).tw,kf. |
| 5             | Concept (Resilience)                | exp Resilience, Psychological/                                                                                                                                                                                                                                                                                                                                                                                                                                                                                                                                                                                                                                                                                                                                                                                                                                                                                                                                                                                                                                                                                                                                                             |
| 6             | Concept (Resilience)                | (resilienc*).tw,kf.                                                                                                                                                                                                                                                                                                                                                                                                                                                                                                                                                                                                                                                                                                                                                                                                                                                                                                                                                                                                                                                                                                                                                                        |
| 7             |                                     | 1 or 2                                                                                                                                                                                                                                                                                                                                                                                                                                                                                                                                                                                                                                                                                                                                                                                                                                                                                                                                                                                                                                                                                                                                                                                     |
| 8             |                                     | 3 or 4                                                                                                                                                                                                                                                                                                                                                                                                                                                                                                                                                                                                                                                                                                                                                                                                                                                                                                                                                                                                                                                                                                                                                                                     |
| 9             |                                     | 5 or 6                                                                                                                                                                                                                                                                                                                                                                                                                                                                                                                                                                                                                                                                                                                                                                                                                                                                                                                                                                                                                                                                                                                                                                                     |
| 10            |                                     | 7 and 8 and 9                                                                                                                                                                                                                                                                                                                                                                                                                                                                                                                                                                                                                                                                                                                                                                                                                                                                                                                                                                                                                                                                                                                                                                              |
| 11            |                                     | limit 10 to (english language and humans and yr="2000 - Current")                                                                                                                                                                                                                                                                                                                                                                                                                                                                                                                                                                                                                                                                                                                                                                                                                                                                                                                                                                                                                                                                                                                          |

## SCOPING REVIEW PROTOCOL

## Embase Database Search Strategy

| Search line # | PCC conceptual term of interest     | Search term entered into OVID-Embase                                                                                                                                                                                                                                                                                                                                                                                                                                                                                                                                                                                                                                                                                                                                                                                                                                                                                                                                                                                                                                                                                                                                                       |
|---------------|-------------------------------------|--------------------------------------------------------------------------------------------------------------------------------------------------------------------------------------------------------------------------------------------------------------------------------------------------------------------------------------------------------------------------------------------------------------------------------------------------------------------------------------------------------------------------------------------------------------------------------------------------------------------------------------------------------------------------------------------------------------------------------------------------------------------------------------------------------------------------------------------------------------------------------------------------------------------------------------------------------------------------------------------------------------------------------------------------------------------------------------------------------------------------------------------------------------------------------------------|
| 1             | Population (Transition-age youth)   | exp Adolescent/ or exp Young Adult/                                                                                                                                                                                                                                                                                                                                                                                                                                                                                                                                                                                                                                                                                                                                                                                                                                                                                                                                                                                                                                                                                                                                                        |
| 2             | Population (Transition-age youth)   | (youth* or transition age youth* or teen* or adolescen* or emerging adult* or young adult* or early adult* or young person* or young people* or juvenile*).tw,kf.                                                                                                                                                                                                                                                                                                                                                                                                                                                                                                                                                                                                                                                                                                                                                                                                                                                                                                                                                                                                                          |
| 3             | Population (Serious mental illness) | exp Mental Disease/ or exp Anxiety Disorder/ or exp Bipolar Disorder/ or exp Dissociative Disorder/ or exp Eating Disorder/ or exp Emotional Disorder/ or exp Mood Disorder/ or exp Attention Deficit Disorder/ or exp Impulse Control Disorder/ or exp Neurosis/ or exp Personality Disorder/ or exp Schizophrenia Spectrum Disorder/ or exp Schizophrenia/ or exp Psychosis/ or exp Somatoform Disorder/ or exp Posttraumatic Stress Disorder/                                                                                                                                                                                                                                                                                                                                                                                                                                                                                                                                                                                                                                                                                                                                           |
| 4             | Population (Serious mental illness) | (mental disorder* or mental illness* or psychiatric disabilit* or psychiatric disorder* or psychiatric diagnosis* or serious emotional disturbance* or severe emotional disturbance* or "mental health condition*" or anxiety disorder* or phobia* or phobic disorder* or panic disorder* or obsessive-compulsive disorder* or OCD or bipolar disorder* or manic disorder* or manic depression or dissociative disorder* or multiple-personality disorder or eating disorder* or anorexi* or bulimi* or binge eating* or "eating disorder not otherwise specified" or EDNOS or "other specified feeding or eating disorder" or OSFED or disordered eating or mood disorder* or depressive disorder* or affective disorder* or depression or cyclothymic disorder* or cyclothymia or dysthymic disorder* or dysthymia or personality disorder* or schizophrenia spectrum disorder* or schizophrenia or psychotic disorder* or psychosis or psychoses or schizoaffective disorder* or psychotic affective disorder* or paranoid disorder* or somatoform disorder* or body dysmorphic disorder* or body dysmorphi* or post-traumatic stress disorder* or adjustment disorder* or PTSD).tw,kf. |
| 5             | Concept (Resilience)                | exp Psychological Resilience/                                                                                                                                                                                                                                                                                                                                                                                                                                                                                                                                                                                                                                                                                                                                                                                                                                                                                                                                                                                                                                                                                                                                                              |
| 6             | Concept (Resilience)                | (resilienc*).tw,kf.                                                                                                                                                                                                                                                                                                                                                                                                                                                                                                                                                                                                                                                                                                                                                                                                                                                                                                                                                                                                                                                                                                                                                                        |
| 7             |                                     | 1 or 2                                                                                                                                                                                                                                                                                                                                                                                                                                                                                                                                                                                                                                                                                                                                                                                                                                                                                                                                                                                                                                                                                                                                                                                     |
| 8             |                                     | 3 or 4                                                                                                                                                                                                                                                                                                                                                                                                                                                                                                                                                                                                                                                                                                                                                                                                                                                                                                                                                                                                                                                                                                                                                                                     |
| 9             |                                     | 5 or 6                                                                                                                                                                                                                                                                                                                                                                                                                                                                                                                                                                                                                                                                                                                                                                                                                                                                                                                                                                                                                                                                                                                                                                                     |
| 10            |                                     | 7 and 8 and 9                                                                                                                                                                                                                                                                                                                                                                                                                                                                                                                                                                                                                                                                                                                                                                                                                                                                                                                                                                                                                                                                                                                                                                              |
| 11            |                                     | limit 10 to (english language and humans and yr="2000 - Current")                                                                                                                                                                                                                                                                                                                                                                                                                                                                                                                                                                                                                                                                                                                                                                                                                                                                                                                                                                                                                                                                                                                          |

SCOPING REVIEW PROTOCOL

PsychINFO Database Search Strategy

| Search line # | PCC conceptual term of interest     | Search term entered into OVID-PsychINFO                                                                                                                                                                                                                                                                                                                                                                                                                                                                                                                                                                                                                                                                                                                                                                                                                                                                                                                                                                                                                                                                                                                                                 |
|---------------|-------------------------------------|-----------------------------------------------------------------------------------------------------------------------------------------------------------------------------------------------------------------------------------------------------------------------------------------------------------------------------------------------------------------------------------------------------------------------------------------------------------------------------------------------------------------------------------------------------------------------------------------------------------------------------------------------------------------------------------------------------------------------------------------------------------------------------------------------------------------------------------------------------------------------------------------------------------------------------------------------------------------------------------------------------------------------------------------------------------------------------------------------------------------------------------------------------------------------------------------|
| 1             | Population (Transition-age youth)   | exp Emerging Adulthood/ or exp Early Adolescence/                                                                                                                                                                                                                                                                                                                                                                                                                                                                                                                                                                                                                                                                                                                                                                                                                                                                                                                                                                                                                                                                                                                                       |
| 2             | Population (Transition-age youth)   | (youth* or transition age youth* or teen* or adolescen* or emerging adult* or young adult* or early adult* or young person* or young people* or juvenile*).tw.                                                                                                                                                                                                                                                                                                                                                                                                                                                                                                                                                                                                                                                                                                                                                                                                                                                                                                                                                                                                                          |
| 3             | Population (Serious mental illness) | exp Mental Disorders/ or exp Chronic Mental Illness or exp Serious Mental Illness/ or exp Affective Disorders or exp Anxiety Disorders/ or exp Attention Deficit Disorder/ or exp Bipolar Disorder/ or exp Dissociative Disorders/ or exp Disruptive Behavior Disorders/ or exp Eating Disorders/ or exp Personality Disorders/ or exp Psychosis/ or exp Schizophrenia/ or exp Somatoform Disorders/ or exp "Stress and Trauma Related Disorders"/                                                                                                                                                                                                                                                                                                                                                                                                                                                                                                                                                                                                                                                                                                                                      |
| 4             | Population (Serious mental illness) | (mental disorder* or mental illness* or psychiatric disabilit* or psychiatric disorder* or psychiatric diagnosis* or serious emotional disturbance* or severe emotional disturbance* or "mental health condition*" or anxiety disorder* or phobia* or phobic disorder* or panic disorder* or obsessive-compulsive disorder* or OCD or bipolar disorder* or manic disorder* or manic depression or dissociative disorder* or multiple-personality disorder or eating disorder* or anorexi* or bulimi* or binge eating* or "eating disorder not otherwise specified" or EDNOS or "other specified feeding or eating disorder" or OSFED or disordered eating or mood disorder* or depressive disorder* or affective disorder* or depression or cyclothymic disorder* or cyclothymia or dysthymic disorder* or dysthymia or personality disorder* or schizophrenia spectrum disorder* or schizophrenia or psychotic disorder* or psychosis or psychoses or schizoaffective disorder* or psychotic affective disorder* or paranoid disorder* or somatoform disorder* or body dysmorphic disorder* or body dysmorphi* or post-traumatic stress disorder* or adjustment disorder* or PTSD).tw. |
| 5             | Concept (Resilience)                | exp "Resilience (Psychological)"/                                                                                                                                                                                                                                                                                                                                                                                                                                                                                                                                                                                                                                                                                                                                                                                                                                                                                                                                                                                                                                                                                                                                                       |
| 6             | Concept (Resilience)                | (resilienc*).tw.                                                                                                                                                                                                                                                                                                                                                                                                                                                                                                                                                                                                                                                                                                                                                                                                                                                                                                                                                                                                                                                                                                                                                                        |
| 7             |                                     | 1 or 2                                                                                                                                                                                                                                                                                                                                                                                                                                                                                                                                                                                                                                                                                                                                                                                                                                                                                                                                                                                                                                                                                                                                                                                  |
| 8             |                                     | 3 or 4                                                                                                                                                                                                                                                                                                                                                                                                                                                                                                                                                                                                                                                                                                                                                                                                                                                                                                                                                                                                                                                                                                                                                                                  |
| 9             |                                     | 5 or 6                                                                                                                                                                                                                                                                                                                                                                                                                                                                                                                                                                                                                                                                                                                                                                                                                                                                                                                                                                                                                                                                                                                                                                                  |
| 10            |                                     | 7 and 8 and 9                                                                                                                                                                                                                                                                                                                                                                                                                                                                                                                                                                                                                                                                                                                                                                                                                                                                                                                                                                                                                                                                                                                                                                           |
| 11            |                                     | limit 10 to (english language and humans and yr="2000 - Current")                                                                                                                                                                                                                                                                                                                                                                                                                                                                                                                                                                                                                                                                                                                                                                                                                                                                                                                                                                                                                                                                                                                       |

## SCOPING REVIEW PROTOCOL

## AMED Database Search Strategy

| Search line # | PCC conceptual term of interest     | Search term entered into OVID-AMED                                                                                                                                                                                                                                                                                                                                                                                                                                                                                                                                                                                                                                                                                                                                                                                                                                                                                                                                                                                                                                                                                                                                                         |
|---------------|-------------------------------------|--------------------------------------------------------------------------------------------------------------------------------------------------------------------------------------------------------------------------------------------------------------------------------------------------------------------------------------------------------------------------------------------------------------------------------------------------------------------------------------------------------------------------------------------------------------------------------------------------------------------------------------------------------------------------------------------------------------------------------------------------------------------------------------------------------------------------------------------------------------------------------------------------------------------------------------------------------------------------------------------------------------------------------------------------------------------------------------------------------------------------------------------------------------------------------------------|
| 1             | Population (Transition-age youth)   | exp Adolescent/                                                                                                                                                                                                                                                                                                                                                                                                                                                                                                                                                                                                                                                                                                                                                                                                                                                                                                                                                                                                                                                                                                                                                                            |
| 2             | Population (Transition-age youth)   | (youth* or transition age youth* or teen* or adolescen* or emerging adult* or young adult* or early adult* or young person* or young people* or juvenile*).tw,et.                                                                                                                                                                                                                                                                                                                                                                                                                                                                                                                                                                                                                                                                                                                                                                                                                                                                                                                                                                                                                          |
| 3             | Population (Serious mental illness) | exp Mental Disorders/ or exp Adjustment Disorders/ or exp Affective Disorders/ or exp Affective Disorders Psychotic/ or exp Bipolar Disorder/ or exp Manic Disorder/ or exp Depressive Disorder/ or exp Mood Disorders/ or exp Anxiety Disorders/ or exp Obsessive Compulsive Disorder/ or exp Phobic Disorders/ or exp Stress Disorders Post Traumatic/ or exp Attention Deficit Disorder with Hyperactivity or exp Child Behavior Disorders/ or exp Dissociative Disorders/ or exp Multiple Personality Disorder/ or exp Eating Disorders/ or exp Anorexia Nervosa/ or exp Bulimia/ or exp Neurotic Disorders/ or exp Personality Disorders/ or exp Borderline Personality Disorder/ or exp Hysteria/ or exp Psychotic Disorders/ or exp Schizophrenia/ or exp Somatoform Disorders/ or exp Conversion Disorder/                                                                                                                                                                                                                                                                                                                                                                         |
| 4             | Population (Serious mental illness) | (mental disorder* or mental illness* or psychiatric disabilit* or psychiatric disorder* or psychiatric diagnosis* or serious emotional disturbance* or severe emotional disturbance* or "mental health condition*" or anxiety disorder* or phobia* or phobic disorder* or panic disorder* or obsessive-compulsive disorder* or OCD or bipolar disorder* or manic disorder* or manic depression or dissociative disorder* or multiple-personality disorder or eating disorder* or anorexi* or bulimi* or binge eating* or "eating disorder not otherwise specified" or EDNOS or "other specified feeding or eating disorder" or OSFED or disordered eating or mood disorder* or depressive disorder* or affective disorder* or depression or cyclothymic disorder* or cyclothymia or dysthymic disorder* or dysthymia or personality disorder* or schizophrenia spectrum disorder* or schizophrenia or psychotic disorder* or psychosis or psychoses or schizoaffective disorder* or psychotic affective disorder* or paranoid disorder* or somatoform disorder* or body dysmorphic disorder* or body dysmorphi* or post-traumatic stress disorder* or adjustment disorder* or PTSD).tw,et. |
| 5             | Concept (Resilience)                | exp Adaptation Psychological/                                                                                                                                                                                                                                                                                                                                                                                                                                                                                                                                                                                                                                                                                                                                                                                                                                                                                                                                                                                                                                                                                                                                                              |
| 6             | Concept (Resilience)                | (resilienc*).tw,et.                                                                                                                                                                                                                                                                                                                                                                                                                                                                                                                                                                                                                                                                                                                                                                                                                                                                                                                                                                                                                                                                                                                                                                        |
| 7             |                                     | 1 or 2                                                                                                                                                                                                                                                                                                                                                                                                                                                                                                                                                                                                                                                                                                                                                                                                                                                                                                                                                                                                                                                                                                                                                                                     |
| 8             |                                     | 3 or 4                                                                                                                                                                                                                                                                                                                                                                                                                                                                                                                                                                                                                                                                                                                                                                                                                                                                                                                                                                                                                                                                                                                                                                                     |
| 9             |                                     | 5 or 6                                                                                                                                                                                                                                                                                                                                                                                                                                                                                                                                                                                                                                                                                                                                                                                                                                                                                                                                                                                                                                                                                                                                                                                     |
| 10            |                                     | 7 and 8 and 9                                                                                                                                                                                                                                                                                                                                                                                                                                                                                                                                                                                                                                                                                                                                                                                                                                                                                                                                                                                                                                                                                                                                                                              |
| 11            |                                     | limit 10 to (english and yr="2000 -Current")                                                                                                                                                                                                                                                                                                                                                                                                                                                                                                                                                                                                                                                                                                                                                                                                                                                                                                                                                                                                                                                                                                                                               |

SCOPING REVIEW PROTOCOL

CINHAL Database Search Strategy

| Search line # | PCC conceptual term of interest     | Search term entered into CINHAL (EBSCO)                                                                                                                                                                                                                                                                                                                                                                                                                                                                                                                                                                                                                                                                                                                                                                                                                                                                                                                                                                                                                                                                                                                                                                                                                                                                                                                                                                                                                                                                                                                        |
|---------------|-------------------------------------|----------------------------------------------------------------------------------------------------------------------------------------------------------------------------------------------------------------------------------------------------------------------------------------------------------------------------------------------------------------------------------------------------------------------------------------------------------------------------------------------------------------------------------------------------------------------------------------------------------------------------------------------------------------------------------------------------------------------------------------------------------------------------------------------------------------------------------------------------------------------------------------------------------------------------------------------------------------------------------------------------------------------------------------------------------------------------------------------------------------------------------------------------------------------------------------------------------------------------------------------------------------------------------------------------------------------------------------------------------------------------------------------------------------------------------------------------------------------------------------------------------------------------------------------------------------|
| 1             | Population (Transition-age youth)   | (MH "Adolescence+") OR (MH "Young Adult")                                                                                                                                                                                                                                                                                                                                                                                                                                                                                                                                                                                                                                                                                                                                                                                                                                                                                                                                                                                                                                                                                                                                                                                                                                                                                                                                                                                                                                                                                                                      |
| 2             | Population (Transition-age youth)   | TI (youth* or "transition age youth*" or teen* or adolescen* or "emerging adult*" or "young adult*" or "early adult*" or "young person*" or "young people*" or juvenile*) OR AB (youth* or "transition age youth*" or teen* or adolescen* or "emerging adult*" or "young adult*" or "early adult*" or "young person*" or "young people*" or juvenile*)                                                                                                                                                                                                                                                                                                                                                                                                                                                                                                                                                                                                                                                                                                                                                                                                                                                                                                                                                                                                                                                                                                                                                                                                         |
| 3             | Population (Serious mental illness) | (MH "Mental Disorders+") or (MH "Mental Disorders, Chronic") or (MH "Neurotic Disorders+") or (MH "Affective Disorders+") or (MH "Seasonal Affective Disorder") or (MH "Depression+") or (MH "Anxiety Disorders+") or (MH "Social Anxiety Disorders") or (MH "Generalized Anxiety Disorder") or (MH "Panic Disorder") or (MH "Obsessive-Compulsive Disorder+") or (MH "Phobic Disorders+") or (MH "Stress Disorders, Post-Traumatic+") or (MH "Psychotic Disorders+") or (MH "Schizophrenia+") or (MH "Affective Disorders, Psychotic+") or (MH "Bipolar Disorders+") or (MH "Dissociative Disorders+") or (MH "Multiple-Personality Disorder") or (MH "Personality Disorders+") or (MH "Adjustment Disorders+") or (MH "Attention Deficit Hyperactivity Disorder") or (MH "Child Behavior Disorders+") or (MH "Eating Disorders+") or (MH "Binge Eating Disorder") or (MH "Avoidant Restrictive Food Intake Disorder") or (MH "Bulimia Nervosa") or (MH "Bulimia") or (MH "Anorexia Nervosa") or (MH "Anorexia") or (MH "Somatoform Disorders+") or (MH "Body Dysmorphic Disorder")                                                                                                                                                                                                                                                                                                                                                                                                                                                                           |
| 4             | Population (Serious mental illness) | TI ("mental disorder*" or "mental illness*" or "psychiatric disabilit*" or "psychiatric disorder*" or "psychiatric diagnosis*" or "serious emotional disturbance*" or "severe emotional disturbance*" or "mental health condition*" or "anxiety disorder*" or phobia* or "phobic disorder*" or "panic disorder*" or "obsessive-compulsive disorder*" or OCD or "bipolar disorder*" or "manic disorder*" or "manic depression" or "dissociative disorder*" or "multiple-personality disorder" or "eating disorder*" or anorexi* or bulimi* or "binge eating*" or "eating disorder not otherwise specified" or EDNOS or "other specified feeding or eating disorder" or OSFED or "disordered eating" or "mood disorder*" or "depressive disorder*" or "affective disorder*" or depression or "cyclothymic disorder*" or cyclothymia or "dysthymic disorder*" or dysthymia or "personality disorder*" or "schizophrenia spectrum disorder*" or schizophrenia or "psychotic disorder*" or psychosis or psychoses or "schizoaffective disorder*" or "psychotic affective disorder*" or "paranoid disorder*" or "somatoform disorder*" or "body dysmorphic disorder*" or "body dysmorphi*" or "post-traumatic stress disorder*" or "adjustment disorder*" or PTSD) OR AB ("mental disorder*" or "mental illness*" or "psychiatric disabilit*" or "psychiatric disorder*" or "psychiatric diagnosis*" or "serious emotional disturbance*" or "severe emotional disturbance*" or "mental health condition*" or "anxiety disorder*" or phobia* or "phobic disorder*" or |

## SCOPING REVIEW PROTOCOL

|    |                      |                                                                                                                                                                                                                                                                                                                                                                                                                                                                                                                                                                                                                                                                                                                                                                                                                                                                                                                                                               |
|----|----------------------|---------------------------------------------------------------------------------------------------------------------------------------------------------------------------------------------------------------------------------------------------------------------------------------------------------------------------------------------------------------------------------------------------------------------------------------------------------------------------------------------------------------------------------------------------------------------------------------------------------------------------------------------------------------------------------------------------------------------------------------------------------------------------------------------------------------------------------------------------------------------------------------------------------------------------------------------------------------|
|    |                      | “panic disorder*” or “obsessive-compulsive disorder*” or OCD or “bipolar disorder*” or “manic disorder*” or “manic depression” or “dissociative disorder*” or “multiple-personality disorder” or “eating disorder*” or anorexi* or bulimi* or “binge eating*” or “eating disorder not otherwise specified” or EDNOS or “other specified feeding or eating disorder” or OSFED or “disordered eating” or “mood disorder*” or “depressive disorder*” or “affective disorder*” or depression or “cyclothymic disorder*” or cyclothymia or “dysthymic disorder*” or dysthymia or “personality disorder*” or “schizophrenia spectrum disorder*” or schizophrenia or “psychotic disorder*” or psychosis or psychoses or “schizoaffective disorder*” or “psychotic affective disorder*” or “paranoid disorder*” or “somatoform disorder*” or “body dysmorphic disorder*” or “body dysmorphi*” or “post-traumatic stress disorder*” or “adjustment disorder*” or PTSD) |
| 5  | Concept (Resilience) | (MH “Hardiness”)                                                                                                                                                                                                                                                                                                                                                                                                                                                                                                                                                                                                                                                                                                                                                                                                                                                                                                                                              |
| 6  | Concept (Resilience) | TI (resilienc*) OR AB (resilienc*)                                                                                                                                                                                                                                                                                                                                                                                                                                                                                                                                                                                                                                                                                                                                                                                                                                                                                                                            |
| 7  |                      | 1 or 2                                                                                                                                                                                                                                                                                                                                                                                                                                                                                                                                                                                                                                                                                                                                                                                                                                                                                                                                                        |
| 8  |                      | 3 or 4                                                                                                                                                                                                                                                                                                                                                                                                                                                                                                                                                                                                                                                                                                                                                                                                                                                                                                                                                        |
| 9  |                      | 5 or 6                                                                                                                                                                                                                                                                                                                                                                                                                                                                                                                                                                                                                                                                                                                                                                                                                                                                                                                                                        |
| 10 |                      | 7 and 8 and 9                                                                                                                                                                                                                                                                                                                                                                                                                                                                                                                                                                                                                                                                                                                                                                                                                                                                                                                                                 |
| 11 |                      | limit 10 to (english language and humans and yr="2000 - Current")                                                                                                                                                                                                                                                                                                                                                                                                                                                                                                                                                                                                                                                                                                                                                                                                                                                                                             |



SCOPING REVIEW PROTOCOL

Scopus Database Search Strategy

| Search line # | PCC conceptual term of interest     | Search term entered into Scopus                                                                                                                                                                                                                                                                                                                                                                                                                                                                                                                                                                                                                                                                                                                                                                                                                                                                                                                                                                                                                                                                                                                                                                                                                                         |
|---------------|-------------------------------------|-------------------------------------------------------------------------------------------------------------------------------------------------------------------------------------------------------------------------------------------------------------------------------------------------------------------------------------------------------------------------------------------------------------------------------------------------------------------------------------------------------------------------------------------------------------------------------------------------------------------------------------------------------------------------------------------------------------------------------------------------------------------------------------------------------------------------------------------------------------------------------------------------------------------------------------------------------------------------------------------------------------------------------------------------------------------------------------------------------------------------------------------------------------------------------------------------------------------------------------------------------------------------|
| 1             | Population (Transition-age youth)   | TITLE-ABS-KEY (youth* or "transition age youth*" or teen* or adolescen* or "emerging adult*" or "young adult*" or "early adult*" or "young person*" or "young people*" or juvenile*)                                                                                                                                                                                                                                                                                                                                                                                                                                                                                                                                                                                                                                                                                                                                                                                                                                                                                                                                                                                                                                                                                    |
| 2             | Population (Serious mental illness) | TITLE-ABS-KEY ("mental disorder*" or "mental illness*" or "psychiatric disabilit*" or "psychiatric disorder*" or "psychiatric diagnosis*" or "serious emotional disturbance*" or "severe emotional disturbance*" or "mental health condition*" or "anxiety disorder*" or phobia* or "phobic disorder*" or "panic disorder*" or "obsessive-compulsive disorder*" or OCD or "bipolar disorder*" or "manic disorder*" or "manic depression" or "dissociative disorder*" or "multiple-personality disorder" or "eating disorder*" or anorexi* or bulimi* or "binge eating*" or "eating disorder not otherwise specified" or EDNOS or "other specified feeding or eating disorder" or OSFED or "disordered eating" or "mood disorder*" or "depressive disorder*" or "affective disorder*" or depression or "cyclothymic disorder*" or cyclothymia or "dysthymic disorder*" or dysthymia or "personality disorder*" or "schizophrenia spectrum disorder*" or schizophrenia or "psychotic disorder*" or psychosis or psychoses or "schizoaffective disorder*" or "psychotic affective disorder*" or "paranoid disorder*" or "somatoform disorder*" or "body dysmorphic disorder*" or "body dysmorphi*" or "post-traumatic stress disorder*" or "adjustment disorder*" or PTSD) |
| 3             | Concept (Resilience)                | TITLE-ABS-KEY (resilienc*)                                                                                                                                                                                                                                                                                                                                                                                                                                                                                                                                                                                                                                                                                                                                                                                                                                                                                                                                                                                                                                                                                                                                                                                                                                              |
| 4             |                                     | 1 and 2 and 3                                                                                                                                                                                                                                                                                                                                                                                                                                                                                                                                                                                                                                                                                                                                                                                                                                                                                                                                                                                                                                                                                                                                                                                                                                                           |
| 5             |                                     | limit 4 to (english language and yr="2000 - Current")                                                                                                                                                                                                                                                                                                                                                                                                                                                                                                                                                                                                                                                                                                                                                                                                                                                                                                                                                                                                                                                                                                                                                                                                                   |

# BMJ Open

## Understanding resilience among transition-age youth with serious mental illness: Protocol for a scoping review

|                                 |                                                                                                                                                                                                                                                                                                                                                                                                                                                                                                                                                                                                                                     |
|---------------------------------|-------------------------------------------------------------------------------------------------------------------------------------------------------------------------------------------------------------------------------------------------------------------------------------------------------------------------------------------------------------------------------------------------------------------------------------------------------------------------------------------------------------------------------------------------------------------------------------------------------------------------------------|
| Journal:                        | <i>BMJ Open</i>                                                                                                                                                                                                                                                                                                                                                                                                                                                                                                                                                                                                                     |
| Manuscript ID                   | bmjopen-2021-059826.R3                                                                                                                                                                                                                                                                                                                                                                                                                                                                                                                                                                                                              |
| Article Type:                   | Protocol                                                                                                                                                                                                                                                                                                                                                                                                                                                                                                                                                                                                                            |
| Date Submitted by the Author:   | 27-Jul-2022                                                                                                                                                                                                                                                                                                                                                                                                                                                                                                                                                                                                                         |
| Complete List of Authors:       | Nesbitt, Amy; University of Toronto, Rehabilitation Sciences Institute Sabiston, Catherine; University of Toronto, Faculty of Kinesiology and Physical Education<br>deJonge, Melissa; University of Toronto, Faculty of Kinesiology and Physical Education<br>Barbic, Skye; The University of British Columbia, Occupational Science and Occupational Therapy; Foundry<br>Kozloff, Nicole; Centre for Addiction and Mental Health; University of Toronto, Department of Psychiatry<br>Nalder, Emily; University of Toronto, Occupational Science and Occupational Therapy; University of Toronto, Rehabilitation Sciences Institute |
| <b>Primary Subject Heading</b>: | Mental health                                                                                                                                                                                                                                                                                                                                                                                                                                                                                                                                                                                                                       |
| Secondary Subject Heading:      | Health services research                                                                                                                                                                                                                                                                                                                                                                                                                                                                                                                                                                                                            |
| Keywords:                       | MENTAL HEALTH, PSYCHIATRY, PUBLIC HEALTH                                                                                                                                                                                                                                                                                                                                                                                                                                                                                                                                                                                            |
|                                 |                                                                                                                                                                                                                                                                                                                                                                                                                                                                                                                                                                                                                                     |

SCHOLARONE™  
Manuscripts

## SCOPING REVIEW PROTOCOL

**1 Understanding resilience among transition-age youth with serious mental illness: Protocol  
2  
3  
4  
5  
6 for a scoping review**

7 Amy E. Nesbitt, MSc (amy.nesbitt@mail.utoronto.ca)<sup>a\*</sup>

8 Catherine M. Sabiston, PhD (catherine.sabiston@utoronto.ca)<sup>b</sup>

9  
10  
11  
12  
13  
14  
15  
16  
17  
18  
19  
20  
21  
22  
23  
24  
25  
26  
27  
28  
29  
30  
31  
32  
33  
34  
35  
36  
37  
38  
39  
40  
41  
42  
43  
44  
45  
46  
47  
48  
49  
50  
51  
52  
53  
54  
55  
56  
57  
58  
59  
60

5 Melissa L. deJonge, MSc (melissa.dejonge@utoronto.ca)<sup>b</sup>

6 Skye Barbic, PhD (skye.barbic@ubc.ca)<sup>c,d</sup>

7 Nicole Kozloff, MD, SM (nicole.kozloff@camh.ca)<sup>e</sup>

8 Emily Nalder, PhD (emily.nalder@utoronto.ca)<sup>a,f</sup>

9 <sup>a</sup> Rehabilitation Sciences Institute, University of Toronto (500 University Avenue, Toronto, ON,  
10 Canada, M5G 1V7)

11 <sup>b</sup> Faculty of Kinesiology and Physical Education, University of Toronto (55 Harbord Street,  
12 Toronto, ON, Canada, M5S 2W6)

13 <sup>c</sup> Department of Occupational Science and Occupational Therapy, University of British  
14 Columbia (T325 - 2211 Wesbrook Mall, Vancouver, BC, Canada, V6T 2B5)

15 <sup>d</sup> Foundry (Vancouver, BC, Canada)

16 <sup>e</sup> Centre for Addiction and Mental Health (250 College Street, Toronto, ON, Canada, M5T 1R8)

17 <sup>f</sup> Department of Occupational Science and Occupational Therapy, University of Toronto (500  
18 University Avenue, Toronto, ON, Canada, M5G 1V7)

19 \*Corresponding author: Amy E. Nesbitt, MSc, OT Reg. (Ont.). Rehabilitation Sciences Institute,  
20 University of Toronto, 500 University Avenue, Toronto, ON, Canada, M5G 1V7. Phone: 416-  
21 978-5837. Fax: 416-971-2118. Email: amy.nesbitt@mail.utoronto.ca

22  
23 **Keywords:** adolescent, young adult, resilience, mental health, review

24 **Word Count:** 4959

## SCOPING REVIEW PROTOCOL

1     **Understanding resilience among transition-age youth with serious mental illness: Protocol**  
2  
3     **for a scoping review**  
4  
5  
6

7  
8     **Abstract**  
9

10    **Introduction:** Transition-age youth (16-29 years old) are disproportionately affected by the  
11    onset, impact and burden of serious mental illness (SMI; e.g., depression, bipolar disorder,  
12    schizophrenia spectrum disorders). Emerging evidence has increasingly highlighted the concept  
13    of resilience in mental health promotion and treatment approaches for this population. A  
14    comprehensive synthesis of existing evidence is needed to enhance conceptual clarity in this  
15    area, identify knowledge gaps, and inform future research and practice. As such, the present  
16    scoping review is guided by the following questions: How has resilience been conceptualized  
17    and operationalized in the transition-age youth mental health literature? What factors influence  
18    resilience among transition-age youth with SMI, and what outcomes have been studied within  
19    the context of transition-age youth's mental health recovery?  
20  
21    **Methods and analysis:** The present protocol will follow six key stages, in accordance with  
22    Arksey and O'Malley's (2005) established scoping review methodology and recent iterations of  
23    this framework, and has been registered with Open Science Framework (<https://osf.io/rzfc5>). The  
24    protocol and review process will be carried out by a multidisciplinary team in consultation with  
25    community stakeholders. A comprehensive search strategy will be conducted across multiple  
26    electronic databases to identify relevant empirical literature. Included sources will address the  
27    population of transition-age youth (16-29 years) diagnosed with SMI, the concept of resilience  
28    (in any context), and will report original research written in English. Data screening and  
29    extraction will be completed by at least two independent reviewers. Following meta-narrative  
30  
31  
32  
33  
34  
35  
36  
37  
38  
39  
40  
41  
42  
43  
44  
45  
46  
47  
48  
49  
50  
51  
52  
53  
54  
55  
56  
57  
58  
59  
60

## SCOPING REVIEW PROTOCOL

1 review and qualitative content analyses, findings will be synthesized as a descriptive overview  
2  
3  
4  
5  
6 with tabular and graphical summaries.

7  
8 **Ethics and dissemination:** University of Toronto Health Sciences Research Ethics Board  
9  
10 approval was obtained to complete the community stakeholder consultation stage of this review.  
11  
12 Results will be disseminated through conference presentations, publications, and user-friendly  
13  
14 reports and graphics.  
15  
16

### 8 **Strengths and limitations of this study**

- 9 • This scoping review study will follow recent recommendations and guidance documents  
10 to promote methodological rigor and has been registered to enhance transparency.
- 11 • Variability in how the population (transition-age youth) and concept (resilience) have  
12 been defined, as well as restrictions to the search strategy based on language, date, and  
13 publication type may limit the breadth of the search.
- 14 • An assessment of the methodological quality of included studies will not be conducted  
15 which limits the types of conclusions and implications that can be drawn from the review.
- 16 • We will apply an iterative and team-based approach, in consultation with community  
17 stakeholders (transition-age youth with SMI, clinicians, researchers) to improve the  
18 applicability and dissemination of results.

## SCOPING REVIEW PROTOCOL

**Introduction**

Transition-age youth (16-29 years old) are the highest risk age group for onset of serious mental illness (SMI; mental illnesses that cause substantial functional impairment, e.g., depression, bipolar disorder, schizophrenia spectrum disorders), the single most disabling group of disorders worldwide (1,2). The experience of mental illness for young people is unique, in that it arises during a critical period of psychosocial development, identity formation, and many complex life transitions (3,4). Access to supportive treatment and relationships, social marginalization, and stigma continue to influence the course and severity of mental illness for transition-age youth (5). Indeed, SMI can negatively impact one's overall physical health, quality of life, and engagement in meaningful life roles and activities, including academics, employment, and social relationships (1,4,6,7). Further, the experience of chronic and persistent symptoms of mental illness can contribute to suicide risk, which is the second leading cause of death among individuals 15-29 years old globally (8,9). Despite the increased risk and burden of SMI among transition-age youth, this age group faces many barriers in accessing service and supports, as they transition out of youth services and into the adult mental health and addiction services sector (10,11). As such, the identification of factors that contribute to transition-age youth's mental health recovery and early intervention are now recognized as priority areas within national and global mental health strategies and guidelines (11–14).

Of particular interest, researchers and clinicians have emphasized the importance of promoting *resilience* in transition-age youth's mental health recovery. Most definitions of resilience refer to positive adaptation in the face of significant adversity as a central or defining feature. However, there are many different ways of conceptualizing resilience (e.g., as a trait, outcome, or dynamic process) (15,16), which has led to some ambiguity in how resilience is

## SCOPING REVIEW PROTOCOL

1 defined and understood across different research disciplines and perspectives (17,18). For  
2  
3  
4  
5  
6  
7  
8  
9  
10  
11  
12  
13  
14  
15  
16  
17  
18  
19  
20  
21  
22  
23  
24  
25  
26  
27  
28  
29  
30  
31  
32  
33  
34  
35  
36  
37  
38  
39  
40  
41  
42  
43  
44  
45  
46  
47  
48  
49  
50  
51  
52  
53  
54  
55  
56  
57  
58  
59  
60

1 defined and understood across different research disciplines and perspectives (17,18). For  
2 example, many authors have conceptualized and discussed resilience as an outcome resulting  
3 from changes made at the individual level, or in relation to positive personal attributes (e.g.,  
4 hope, self-efficacy, coping) (19,20). This aligns with early definitions of resilience as an  
5 exceptional personal quality or trait, that an individual either has or does not have, which will  
6 determine their capacity to both endure incredibly stressful life events and continue on a path  
7 towards full functional and emotional recovery (15,21,22). Conceptualizations of resilience as a  
8 personal trait or outcome have been criticized in recent research as this does not recognize the  
9 critical role of one's environment and available resources (17,23).

10 In more contemporary and holistic conceptions, "resilience has come to be seen less in  
11 terms of static characteristics within the individual and more as a dynamic and multi-faceted  
12 family of processes that evolve over time" (p. 234) (24). To illustrate, resilience has been  
13 conceptualized as a dynamic process, involving one's personal characteristics, environment, and  
14 support networks, that influence how an individual "bounces back" from challenging  
15 circumstances (e.g., onset of mental illness) (16–18,25). This also acknowledges the integral role  
16 of not only the individual, but the social and ecological systems that influence resilience (26,27).  
17 For example, Wathen and colleagues (2012) offer the following definition further contextualized  
18 to the field of trauma and mental health: "Resilience is a dynamic process in which  
19 psychological, social, environmental and biological factors interact to enable an individual at any  
20 stage of life to develop, maintain, or regain their mental health despite exposure to adversity" (p.  
21 10) (28). Through this lens, resilience is seen as fluid (rather than a fixed or pre-determined  
22 trait), arising through multiple pathways that lead to positive indices of flourishing and  
23 functioning (29). Taken together, processes of resilience are shaped by the complex interplay

## SCOPING REVIEW PROTOCOL

1 between individual experiences of stress / adversity, multimodal “*resilience factors*” (e.g., risks,  
2 internal and external protective factors, self-regulatory strategies), as well as one’s adaptation  
3 and other resilience-related outcomes (25,30).

4 This process-oriented perspective of resilience has gained increased attention in mental  
5 health and rehabilitation sciences research over the past two decades (19,29), and has aligned  
6 with the paradigm shift towards recovery models of mental health and the growing popularity  
7 and application of positive psychology principles in psychiatry (31). Indeed, resilience research  
8 and recovery models of mental health share an orientation towards understanding the processes  
9 that underly individual experiences (embedded within one’s sociocultural context / environment)  
10 and emphasize the importance of hope, meaning, engagement, and life satisfaction in one’s  
11 recovery (32–34). Recent conceptual models (35) and interventions (36,37) focused on youth-  
12 specific and integrated mental health services also highlight resilience as an important aspect to  
13 the recovery process. Additionally, adopting a resilience perspective aligns with more strengths-  
14 based and transdiagnostic approaches which aim to better understand processes of recovery  
15 relevant to a broader range of adolescent and young adult mental health service users (38).  
16 Researchers have begun to uncover resilience factors across and beyond specific diagnoses,  
17 which can be targeted in interventions to promote positive development, functioning, and well-  
18 being (26,29,30,39). As such, the study of resilience among transition-age youth with SMI can  
19 inform developments in recovery-oriented approaches to service delivery and warrants further  
20 exploration.

21 In sum, emerging evidence and frameworks of resilience provide a unique lens to  
22 understanding mental health among transition-age youth, with the capacity to recognize  
23 individuals’ strengths, and move beyond the common focus on illness, deficits and problems in



## SCOPING REVIEW PROTOCOL

1 rehabilitation sciences (35). However, researchers have not yet developed a theoretical  
2 framework or model of resilience tailored to the unique experiences of transition-age youth who  
3 are diagnosed with SMI to guide research and practice (19). In addition, conceptualizations of  
4 resilience vary across the scientific literature, which directly impacts how the concept of  
5 resilience is understood, operationalized and applied within this context. This is important to  
6 address as discrepancies across definitions of resilience may limit measurement, study  
7 comparisons, and current understandings of resiliency-informed care approaches in research and  
8 clinical practice (23). A comprehensive synthesis of existing evidence will enhance conceptual  
9 clarity in this area, identify factors and outcomes that are relevant to transition-age youth's  
10 resilience, and inform future work.

### **Objectives**

12 The overarching purpose of the present scoping review is to synthesize and describe the  
13 breadth of scientific literature on resilience among transition-age youth diagnosed with SMI,  
14 identify current knowledge gaps, and recommend key areas for future resilience research among  
15 this population. Specifically, this scoping review will explore how the concept of resilience has  
16 been conceptualized and operationalized in the transition-age youth mental health literature, and  
17 identify resilience factors and outcomes that have been studied within the context of transition-  
18 age youth's mental health recovery (e.g., adversity, risks, internal and external protective factors,  
19 self-regulatory strategies, adaptation and resilience-related outcomes). The focus of this review  
20 will be on conceptualizations of resilience from a process-oriented perspective (rather than as a  
21 personal trait or outcome).

### **Methods and Analysis**

## SCOPING REVIEW PROTOCOL

1 A scoping review design was selected based on the exploratory nature of the proposed  
2 research question and the current focus on clarifying the concept of resilience. Particularly, a  
3 scoping review design allows for a comprehensive summary of knowledge, inclusive of more  
4 broad study objectives and methodologies, and is thus recommended for gaining conceptual  
5 clarity and identifying key knowledge gaps (40,41).

6 The scoping review protocol will follow the methodological stages outlined by Arksey  
7 and O'Malley (2005), and extended by Levac and colleagues (2010), including: i) identifying the  
8 research question, ii) identifying relevant studies, iii) study selection, iv) charting the data, v)  
9 collating, summarizing, and reporting the results, and vi) stakeholder consultation (42,43).

10 Throughout the review process, an iterative and reflexive approach will be used in order to refine  
11 the initial protocol as needed in consultation with a community stakeholder group (involving  
12 researchers, clinicians, and transition-age youth with SMI) (42,43). Recent guidance documents  
13 (44) and best practices for conducting and reporting scoping reviews (PRISMA-ScR) (45) will  
14 also be applied to promote methodological rigor and transparency. The PRISMA-P checklist (46)  
15 can be found in Appendix A (online supplementary). The current protocol has been registered  
16 through Open Science Framework (<https://osf.io/rzfc5>), and will be conducted over a one-year  
17 timeframe (December 2021 to November 2022).

### 18 **Stage 1: Identifying the Research Question**

19 This scoping review aims to explore the extent and breadth of the current scientific  
20 literature on resilience among transition-age youth diagnosed with SMI. Specifically, the review  
21 will address two research questions: (1) How has resilience been conceptualized and  
22 operationalized (i.e., defined and measured) in the transition-age youth mental health literature?  
23 (2) What factors influence resilience among transition-age youth with SMI, and what outcomes

## SCOPING REVIEW PROTOCOL

1 have been studied within the context of transition-age youth's mental health recovery? The  
2 research questions have been broadly framed using the PCC mnemonic to address the *population*  
3 of transition-age youth diagnosed with SMI and the *concept* of resilience within any *context* of  
4 one's mental health recovery (41). Each component is further clarified below, in accordance with  
5 the Joanna Briggs Institute scoping review manual (44).

6 **Population.** For the present review, the population is defined as "transition-age youth",  
7 including adolescents and young adults between the ages of 16 and 29 years old, who are  
8 entering adulthood and have been diagnosed with SMI. It is important to note that definitions of  
9 "youth", "adolescents", and "young adults" differ across various cultures and settings, and are  
10 thus highly mixed within the scholarly literature. In order to be inclusive of the most common  
11 European/United Nations/WHO definitions of this age group and reflective of current mental  
12 health service models, the present review will include studies with participants spanning middle  
13 adolescence (age 15) to the "upper limit" of young adulthood (age 36) if the target population is  
14 clearly defined as "transition-age youth" (3,14,47–50). Additionally, serious mental illness  
15 (SMI) is defined as "a mental, behavioral, or emotional disorder resulting in serious functional  
16 impairment, which substantially interferes with or limits one or more major life activities", such  
17 as one's interpersonal relationships, self-care, employment, or recreation (51,52). Definitions of  
18 SMI exclude dementias, developmental disorders, and substance use disorders, as well as mental  
19 disorders due to a general medical condition (52). Examples of mental health conditions that may  
20 meet criteria for SMI include: major depressive disorders, bipolar disorders, borderline  
21 personality disorder, anxiety disorders, eating disorders and schizophrenia spectrum disorders  
22 (51,52). Among youth and adolescents (under age 18) the same definition and examples are  
23 applied but also occasionally termed "serious emotional disturbance" (SED), rather than SMI

## SCOPING REVIEW PROTOCOL

(52,53). Studies with participants experiencing co-morbid disorders which are not the primary focus will also be included in this scoping review.

**Concept.** While definitions of resilience vary across different research disciplines, most definitions refer to positive adaptation in the face of significant challenge, risk or adversity as central or defining features, and acknowledge the importance of sociocultural factors in shaping experiences and understandings of resilience (19). For the purpose of this scoping review, resilience is defined as a dynamic process that unfolds over time, involving multiple resilience factors that interact to enable individuals to negotiate or recover from stressful life events / adversity (e.g., one's personal characteristics, environment and support networks). Studies that adopt this process-oriented perspective will be included, and the following core elements of resilience and resilience factors will be explored: adversity, risks, internal and external protective factors, self-regulatory strategies, adaptation and resilience-related outcomes (25,30). Studies that focus solely on a trait perspective of resilience, similar constructs (e.g., ego-resilience, psychological capital) or biological / genetic / neurophysiological factors will be omitted. Lastly, given our focus on psychological resilience at the person- or individual-level, studies evaluating family- or community-level resilience will not be included.

**Context.** While "clinical recovery" is often defined as a reduction in SMI symptoms or impairment (typically in clinical / health care settings), "personal recovery" refers to the processes that contribute to transition-age youth's hope, development, and engagement in meaningful activities (even while facing SMI) and emphasizes the importance of multiple contexts where this occurs (e.g., spanning personal, familial, social and institutional environments) (35). The present review considers mental health recovery primarily through a personal recovery lens, and will thus explore transition-age youth's resilience in any context of

## SCOPING REVIEW PROTOCOL

1 their mental health recovery, which may include individual, community, and health-oriented  
2 settings (among others).

### 3 **Stage 2: Identifying Relevant Literature**

4 **Information source.** To comprehensively review the existing evidence and knowledge  
5 base related to resilience in the field of transition-age youth mental health, empirical sources will  
6 be considered, including original research / primary studies. Specifically, six electronic databases  
7 of value to the fields of psychology, health and rehabilitation sciences will be searched to  
8 identify relevant empirical studies: MEDLINE (Ovid), EMBASE (Ovid), PsycINFO, AMED,  
9 CINAHL, and Scopus. To enhance the comprehensiveness of the search, relevant journals and  
10 the reference list of included sources and similar reviews will be manually searched.

11 **Search strategy.** The search terms and search strategy will be developed by the  
12 multidisciplinary review team, in consultation with a health sciences librarian at the University  
13 of Toronto. Importantly, keywords have been carefully selected to best capture the complex and  
14 evolving terminology used to describe the population and concept reflected in our research  
15 question. As mentioned, terms to describe the age group of transition-age youth are highly  
16 variable and inconsistent within the literature (e.g., subject headings / keywords may be inclusive  
17 of youth / teenagers / adolescents / emerging adults / adults etc.). Clinical and lay language to  
18 describe SMI diagnoses have also evolved over time, with “severe and persistent mental illness”  
19 and “chronic mental illness” often cited (52). Further, as reflected in the research aims, there is  
20 currently no consensus on the definition of resilience and conceptualizations differ based on the  
21 context or academic discipline applied (19). To overcome these challenges in the development  
22 and execution of our search, we will utilize the following techniques: i) a multi-step search  
23 process to ensure relevant sources are not missed (an initial limited search strategy favoring

## SCOPING REVIEW PROTOCOL

1 sensitivity over precision will be conducted first and inform potential revisions making the  
2 search strategy more precise); ii) use of Yale MeSH analyzer for piloting; and iii) ongoing expert  
3 consultation. Additionally, the search strategy will undergo peer review to enhance its feasibility  
4 and rigor (e.g., CADTH Peer Review Checklist for Search Strategies) (54).

5 The preliminary search strategy and list of keywords have been developed using  
6 MEDLINE (Ovid) and adapted to each database (see Appendix B online supplementary). The  
7 search strategy will explore specified search terms within subject headings, titles, abstracts and  
8 keywords. Search terms will be combined using appropriate Boolean logic and operators (e.g.,  
9 ‘and’, ‘or’, ‘not’).

### 10 **Stage 3: Study Selection**

11 Study selection will follow a collaborative and iterative screening process among the  
12 review team using Covidence systematic review software (55) and pre-determined eligibility  
13 criteria (42,43). All search results will be exported to Covidence for data management and to  
14 remove duplicates. At least two independent reviewers (authors AN and MD) will complete  
15 screening in two stages for i) title/abstract and ii) full-text review. The reviewers will complete a  
16 calibration exercise using a sample of 10 references to pilot inclusion / exclusion criteria and  
17 compare decisions (e.g., include / exclude / uncertain). Formal title/abstract screening will  
18 commence when 80% agreement is achieved and will involve regular meetings among reviewers  
19 to discuss any challenges or uncertainties. Upon completion of stage 1, full-text references will  
20 be obtained and independently screened by the same two reviewers. The same strategy will be  
21 applied to stage 2 full-text screening, including piloting (calibration exercise for 10 references)  
22 and regular discussion. At each stage, reviewer (inter-rater) agreement will be reported.

## SCOPING REVIEW PROTOCOL

1 Disagreements will be resolved by consensus or by the decision of a third reviewer (senior  
2 authors EN and CS).

3 Included sources will address the population of transition-age youth diagnosed with SMI,  
4 the concept of resilience (in any context), and will contain original peer reviewed research  
5 written in English. Specific language restrictions were made for feasibility purposes.  
6 Additionally, the publishing date was limited to the years 2000 to 2022 as this is the time period  
7 where a significant rise in resilience research emerged within mental health and rehabilitation  
8 sciences (19,29,56). The prioritisation, implementation and evaluation of mental health services  
9 specifically tailored to transition-age youth (e.g., early intervention programs) also mainly took  
10 root after the year 2000 (13,47,57). Further inclusion / exclusion criteria for the two-stage  
11 screening are detailed below.

**Eligibility for Stage 1 Title/Abstract Review:**

12 **Inclusion criteria.** a) Population: Refers to transition-age youth diagnosed or living with  
13 SMI (as defined previously). b) Concept: Resilience / resiliency is identified as a key focus  
14 within the purpose / objectives / research question, outcome measure, and/or findings. c)  
15 Context: Is set in any individual, community or health-oriented context of mental health  
16 recovery. d) Type of source: Peer reviewed original research (quantitative, qualitative, mixed  
17 method). e) Publication language / date: Written in English and published between 2000 and  
18 2022.

19 **Exclusion criteria.** a) Population: Refers to non-clinical population, general population,  
20 children / youth (age 0-14), or childhood developmental disorder. b) Concept: Resilience /  
21 resiliency is not an explicit focus. c) Type of source: Peer reviewed articles with the primary aim  
22 of developing, reporting or validating the psychometric properties of survey measures /  
23

## SCOPING REVIEW PROTOCOL

1 instruments, study protocols, review articles (e.g., systematic/scoping reviews, meta-analyses),  
2 books / book chapters, and grey literature (e.g., editorials, commentaries / reports, clinical  
3 guidelines, conference proceedings, and theses / dissertations). d) Publication language / date:  
4 Written in another language than English and published before January 1, 2000.

### 5 *Eligibility for Stage 2 Full-text Review:*

6 ***Inclusion criteria.*** a) Population: Clearly defined clinical population in accordance with  
7 either: participant self-reported history of SMI; clinician confirmed diagnosis of SMI; or DSM-V  
8 / ICD-10 system diagnostic criteria. b) Concept: Must explicitly define / operationalize the  
9 concept of resilience from a process-oriented perspective and focus on individual-level  
10 resilience.

11 ***Exclusion criteria.*** a) Population: Mixed samples whereby transition-age youth with SMI  
12 are encompassed within broader age groups or the general population (without the stratification  
13 of results / reporting). b) Concept: Trait resilience, other psychological constructs that are similar  
14 or connected to resilience / resiliency (e.g., psychological capital, hardiness, grit, general indices  
15 of subjective well-being), family- or community-level resilience, or biological / genetic /  
16 neurophysiological factors are identified as the sole / primary focus or outcome.

17 While criteria were developed to maintain a broad scope of selected studies, our hope is  
18 that stringent inclusion / exclusion criteria will eliminate sources that only include the concept of  
19 resilience as an opinion, recommendation, vague interpretation, or buzzword – as this will not  
20 aid in enhancing conceptual clarity in this research area. As such, these broad eligibility criteria  
21 may undergo further refinement to ensure that selected sources capture the full breadth of  
22 knowledge available related to resilience among young people with SMI.

### 23 **Stage 4: Data Extraction**



## SCOPING REVIEW PROTOCOL

1           Following recommended data charting methods (42,43), a standardized and systematic  
2  
3  
4  
5  
6  
7  
8  
9  
10  
11  
12  
13  
14  
15  
16  
17  
18  
19  
20  
21  
22  
23  
24  
25  
26  
27  
28  
29  
30  
31  
32  
33  
34  
35  
36  
37  
38  
39  
40  
41  
42  
43  
44  
45  
46  
47  
48  
49  
50  
51  
52  
53  
54  
55  
56  
57  
58  
59  
60

1           Following recommended data charting methods (42,43), a standardized and systematic  
2 charting form (Table 1) will be used to organize and interpret relevant details from the selected  
3 sources in line with our research question and objectives. The following information will be  
4 charted in Excel: i) general document details, ii) key characteristics of empirical studies (e.g.,  
5 research design, methods, intervention details, youth engagement, intersectional approaches,  
6 study population, context), iii) how resilience was conceptualized and operationalized (e.g.,  
7 definition, theoretical framework / model, academic discipline, measures), and iv) resilience  
8 factors and outcomes identified.

9           The preliminary chart form was also developed in accordance with Greenhalgh and  
10 colleagues' (2005) meta-narrative approach (58). Specifically, this meta-narrative approach was  
11 originally created to detail how a field of study or key concept has evolved over time and to  
12 explore potential tensions that exist across research traditions (or "paradigms") within  
13 knowledge syntheses (58). A meta-narrative approach is recommended when examining  
14 complex, heterogeneous bodies of literature where a key concept of interest has been  
15 conceptualized and investigated through different research traditions, and conceptual clarity is  
16 needed (58). According to Greenhalgh et al. (2005), a *research tradition* refers to a paradigm of  
17 inquiry, undertaken by researchers, that shares four key interrelated dimensions (conceptual,  
18 theoretical, methodological, instrumental), and thus shows distinct disciplinary roots, scope and  
19 key concepts (58). Research traditions are often characterized and influenced by seminal  
20 conceptual papers that inform the direction and focus of future work (58). Alternatively, an  
21 *academic discipline* is defined as a broader field of study or branch of knowledge (e.g.,  
22 sociology, psychology, medicine) (58).

## SCOPING REVIEW PROTOCOL

1 Data extraction will be a collaborative and iterative process among the review team to  
 2 ensure that key characteristics, definitions, themes and strengths/limitations are captured. A  
 3 calibration exercise using a sample of 5 studies will be completed by two reviewers to pilot the  
 4 chart form. When agreement of at least 80% is achieved, the two independent reviewers (authors  
 5 AN and MD) will complete the remaining formal data charting procedures for all references. The  
 6 charting form will be revised as needed based on stakeholder feedback. Consensus will be  
 7 reached through discussion or final decision by a third reviewer (senior authors EN and CS) if  
 8 necessary. Any challenges in the organization / categorization of data at this stage will be  
 9 brought to the four content experts on this protocol (CS, SB, NK, EN), each of whom have over  
 10 10 years of research and/or clinical experience in young adult mental health and resiliency.

11 *Table 1. Draft charting form*

|                                                        |                                                                                                                                                                                                 |
|--------------------------------------------------------|-------------------------------------------------------------------------------------------------------------------------------------------------------------------------------------------------|
| General document details                               |                                                                                                                                                                                                 |
| APA citation                                           | Full author, date and journal details.                                                                                                                                                          |
| Country and location                                   | Country of publication (and location if provided).                                                                                                                                              |
| Study characteristics                                  |                                                                                                                                                                                                 |
| Study purpose                                          | Purpose, research question(s), aim(s), and/or objective(s) of the study.                                                                                                                        |
| Study population and sample size                       | Age range, SMI (clinical diagnosis / self-reported; stage of illness), relevant demographic characteristics. Number of participants.                                                            |
| Study design and methods                               | Quantitative, qualitative, or mixed methods. Main experimental, observational or qualitative methods used.                                                                                      |
|                                                        | Intervention (if applicable): Description of key characteristics (e.g., intervention purpose / target, type, main components, duration)                                                         |
|                                                        | Youth engagement (if applicable): Extent to which youth with SMI were engaged through aspects of the research process.                                                                          |
|                                                        | Intersectional approaches (if applicable): Description of recruitment procedures, theoretical frameworks, and analyses addressing diversity and intersecting social identities of participants. |
| Context                                                | The setting of the research if provided (e.g., community, health-oriented, specific treatment / program).                                                                                       |
| Conceptualization and operationalization of resilience |                                                                                                                                                                                                 |

## SCOPING REVIEW PROTOCOL

|                                        |                                                                                                                                           |
|----------------------------------------|-------------------------------------------------------------------------------------------------------------------------------------------|
| Conceptualization                      | How was resilience described from a process-oriented perspective?                                                                         |
| Definition of resilience               | Definition or operationalization of resilience.                                                                                           |
| Theoretical framework/model            | Theory, conceptual model(s) or framework(s) applied.                                                                                      |
| Seminal papers referenced              | Overarching paradigm and seminal conceptual papers that have informed the research (if applicable).                                       |
| Instruments used to measure resilience | Specific measures / surveys employed (if applicable).                                                                                     |
| Academic discipline                    | Broad field of research or practice.                                                                                                      |
| Resilience factors and outcomes        |                                                                                                                                           |
| Adversity / risks                      | Personal or environmental risk factors identified (if applicable).                                                                        |
| Internal / external protective factors | Personal or environmental protective factors identified (if applicable).                                                                  |
| Self-regulatory strategies             | Strategies identified to self-manage mood, emotions, thoughts, and/or behaviors (if applicable).                                          |
| Study outcomes                         | Any outcomes that were measured or described. Description of positive change, resilience-related outcomes, or adaptation (if applicable). |
| Important results                      | Description of main findings and implications.                                                                                            |

**Stage 5: Collating, Summarizing, and Reporting the Results**

The PRISMA-ScR Checklist will guide the presentation of results in the final report (45). This will include a flow diagram to explicitly detail review decision making processes (45). Data from eligible full-texts will be analyzed and collated using meta-narrative and qualitative content analyses as well as descriptive statistics (e.g., frequencies / counts). Results of this scoping review will be summarized narratively in a descriptive overview (42,43).

Qualitative content analysis will be used to identify, analyze, and report patterns across the included empirical sources to understand how resilience has been conceptualized and operationalized among transition-age youth with SMI. Particularly, definitions, measures, resilience factors and outcomes will be open-coded, and then grouped to generate distinct categories. Aspects of the study population and context of mental health recovery may also be analyzed. The inductive and reflexive coding process will be completed by two reviewers

## SCOPING REVIEW PROTOCOL

1 (authors AN and MD) using Nvivo software. Categories will then be reviewed and discussed  
2 with all members of the multidisciplinary review team (CS, SB, NK, EN) for further refinement.  
3 As guided by Greenhalgh et al. (2005) for meta-narrative review, findings will be organized and  
4 synthesized to map conceptualizations of resilience over time and across different research  
5 traditions (58). Research traditions will be identified through a process of grouping articles that  
6 reflect similar theoretical, methodological and/or instrumental approaches (e.g., seminal papers  
7 cited, how the authors frame the concept of resilience within the study outcomes or  
8 implications). This will allow for easier interpretation of the extent and breadth of the current  
9 literature on resilience among transition-age youth diagnosed with SMI. Particularly,  
10 comparisons and tensions across definitions of resilience may be highlighted according to each  
11 paradigm.

12 Reflexivity will support methodological rigor and transparency by explicitly  
13 acknowledging how the researchers' positionality may influence the motivations and  
14 methodological choices that ultimately shape the review process, interpretations, and results (59–  
15 61). Ongoing reflexive practice will be used to address and challenge researcher biases,  
16 assumptions, and preunderstandings that may influence study decisions and analyses, and to  
17 critically analyze positions of privilege and power in research activities. Detailed notes of our  
18 decision-making processes and justifications will be documented throughout all stages of the  
19 scoping review.

20 For the purpose of the present scoping review, we will use a combination of narrative,  
21 tabular, and graphical summaries to present key findings (42,43). A traditional summary chart  
22 will describe key characteristics of each included source (e.g., author and year of publication,  
23 research tradition, academic discipline, study design, study population, definitions of resilience,

## SCOPING REVIEW PROTOCOL

1 measures, main findings). Resilience factors and outcomes will be summarized in a table or  
2 figure. A creative graphical / visual depiction of identified research traditions and timeframe will  
3 also be used to “map” key findings of the review (58). In sum, the analytic approach has been  
4 developed to facilitate conceptual / theoretical advancements in resilience research, identify key  
5 knowledge gaps, and highlight potential future directions in the study of transition-age youth  
6 resilience and mental health. The presentation and reporting of results (through summaries,  
7 tables, and visuals) will be discussed among the multidisciplinary review team and community  
8 stakeholder group. Consistent input from the perspective of researchers, clinicians, and  
9 transition-age youth with SMI will enhance the relevance and utility of the review findings.

### 10 **Stage 6: Stakeholder Consultation**

11 The overarching goal of the current scoping review is to systematically explore the  
12 current extent and breadth of peer reviewed research on resilience among transition-age youth  
13 diagnosed with SMI. Particularly, efforts have been made within the scoping review  
14 methodology to provide a holistic and coherent overview of evidence that can inform future  
15 research, education, and practice (41–43). In order to achieve these goals, the multidisciplinary  
16 review team has been formed to include knowledgeable stakeholders (researchers, clinicians,  
17 knowledge users) with backgrounds in psychiatry / early intervention services (NK),  
18 occupational therapy / resiliency in rehabilitation sciences (AN, SB, EN), and kinesiology /  
19 young adult mental health programming (MD, CS).

20 Following Levac and colleagues’ (2010) recommendations, this scoping review will also  
21 consult with community stakeholders to gain the perspectives of transition-age youth with lived  
22 experience of SMI, clinicians, and other mental health / resiliency researchers (43). To achieve  
23 Stage 6 of this review, qualitative focus groups will be conducted virtually (using online

## SCOPING REVIEW PROTOCOL

teleconferencing). Community stakeholders will be invited through the review team's current research / practice networks and established partnerships with youth-focused mental health services in Canada. Recruitment materials (emails, e-posters) will share details regarding eligibility, focus group participation, and the letter of informed consent form. Interested participants will provide written informed consent by digitally signing a secure online consent form on the University of Toronto's Research Electronic Data Capture (REDCap) platform.

Consultative meetings will be held at two time points to inform: i) the research methods (Topic Consultation and Input Meeting), and ii) interpretation, reporting and knowledge translation strategies (Reaction Meeting). Following current recommendations for stakeholder consultation (43,62,63) and focus group studies (64,65), up to 3 focus groups (n = 6-10 participants each) will be conducted at each time point. For the Topic Consultation and Input Meeting, community stakeholders will be asked about their perspectives of the review objectives and methods, key areas of focus for data extraction and analysis (e.g., important aspects of transition-age youth resilience to capture within the charting form), and what they would most like to learn from the results of the scoping review. At the time of the Reaction Meeting, community stakeholders will be asked about their impression of key review findings (e.g., how resilience has been defined), whether this resonates with them/their experiences, where gaps/tensions exist that require further investigation, and how this knowledge can be applied to support mental health recovery. This will shape how results are presented and interpreted in the final scoping review paper and guide decision making on knowledge dissemination strategies. We will aim for equal representation among the researchers, clinicians, and young people involved in each focus group. The consent form and group norms will be reviewed with participants at the start of each focus group discussion. Focus groups will be co-facilitated by

## SCOPING REVIEW PROTOCOL

1 two members of the review team (AN, MD) virtually using a semi-structured interview guide.  
2  
3 Audio recordings will be transcribed verbatim to complete directed content analysis (66).  
4  
5 Complete methods and results will be detailed in the final report (including stakeholder group  
6 characteristics, sample size, data collection tools, analysis, and findings) (43). Several  
7 recommendations to enhance the trustworthiness of qualitative content analysis will be employed  
8 (67,68), including: (i) member checking, (ii) clear description of the context and participant  
9 characteristics, (iii) transparent reporting of the coding process and agreement, and (iv) use of  
10 illustrative quotes, as well as frequencies / counts where appropriate, to summarize results.

11  
12 Guided by scoping review practices, stakeholder engagement will promote a more  
13 collaborative approach, emphasize the voices of young people and knowledge users, and  
14 ultimately maximize the potential contribution of the research (43). Particularly, involving  
15 transition-age youth with SMI as part of the review process will facilitate feedback on the  
16 relevance and usefulness of the review findings. This is considered essential for not only  
17 advancing research and practice in youth mental health, but also addressing recent concerns of  
18 the “weaponization” of resiliency in rehabilitation (e.g., adding stress, pressure, or individual  
19 onus to “become resilient” at times of increased vulnerability) by drawing on the values and  
20 perspectives of young people (69–71).

### **Patient and Public Involvement**

21 Patients and members of the public have not been involved in the design of this scoping  
22 review and the protocol development. However, the perspectives of transition-age youth who  
23 have experienced SMI will be gathered during the review process. Their feedback will inform  
24 our methods, interpretation of results, and knowledge dissemination plan.

### **Ethics and Dissemination**

## SCOPING REVIEW PROTOCOL

1            This scoping review study received approval by the University of Toronto Health  
2  
3            1            Sciences Research Ethics Board to conduct the community stakeholder input and reaction  
4  
5            2            meetings (stage 6), which involve collection and analysis of primary data. Results of the review  
6  
7            3            will be disseminated through traditional approaches, including open-access peer-reviewed  
8  
9            4            publication(s), presentations at 1-2 national/international conferences, and a plain-language  
10  
11            5            summary report. Additional knowledge translation strategies may be used dependent on  
12  
13            6            community stakeholder feedback to share findings, key messages and future directions (e.g.,  
14  
15            7            infographics, social media).  
16  
17  
18  
19  
20  
21

### Conclusion

22            9  
23  
24            10            The distinct impact and burden of SMI among young people has been increasingly  
25  
26            11            recognized among researchers and clinicians. This has provoked new research and care  
27  
28            12            approaches centered on building resiliency. Despite a recent surge in examinations of resilience  
29  
30            13            in the context of transition-age youth mental health recovery, there remains a lack of  
31  
32            14            understanding on the core meanings, processes and outcomes of resilience among this  
33  
34            15            population. To our knowledge, this will be the first scoping review to systematically examine  
35  
36            16            how resilience is conceptualized and operationalized among transition-age youth with SMI, and  
37  
38            17            explore what resilience factors and outcomes have been studied. A comprehensive synthesis,  
39  
40            18            developed in collaboration with community stakeholders, is needed to advance research and  
41  
42            19            clinical practice.  
43  
44  
45  
46  
47  
48  
49  
50  
51  
52  
53  
54  
55  
56  
57  
58  
59  
60



## SCOPING REVIEW PROTOCOL

- 1  
2  
3 1 **Contributorship Statement:** AN led the conceptualization of this review and drafted the  
4  
5 2 protocol manuscript with support from CS, MD, SB, NK, and EN. MD was involved in the  
6  
7 3 review design and refining the search strategy. CS, SB, NK, and EN were also involved in the  
8  
9 4 review design, and the development of the eligibility criteria and data extraction forms. All  
10  
11 5 authors provided feedback on the manuscript and approval for submitting this protocol  
12  
13 6 manuscript for publication.  
14  
15  
16 7 **Competing Interests:** None declared. There are no competing interests for any author.  
17  
18 8 **Funding:** This research received no specific grant from any funding agency in the public,  
19  
20 9 commercial or not-for-profit sectors.  
21  
22  
23 10 **Data Sharing Statement:** No data are associated with this article.  
24  
25  
26 11 **Patient Consent:** Not required.  
27  
28 12 **License Statement:** I, the Submitting Author has the right to grant and does grant on behalf of  
29  
30 13 all authors of the Work (as defined in the below author licence), an exclusive licence and/or a  
31  
32 14 non-exclusive licence for contributions from authors who are: i) UK Crown employees; ii) where  
33  
34 15 BMJ has agreed a CC-BY licence shall apply, and/or iii) in accordance with the terms applicable  
35  
36 16 for US Federal Government officers or employees acting as part of their official duties; on a  
37  
38 17 worldwide, perpetual, irrevocable, royalty-free basis to BMJ Publishing Group Ltd (“BMJ”) its  
39  
40 18 licensees and where the relevant Journal is co-owned by BMJ to the co-owners of the Journal, to  
41  
42 19 publish the Work in BMJ Open and any other BMJ products and to exploit all rights, as set out in  
43  
44 20 our licence.  
45  
46  
47 21 **Acknowledgements:** We would like to acknowledge Julia Martyniuk, Health Sciences Librarian  
48  
49 22 (University of Toronto), for their expertise and assistance in developing the search strategy for  
50  
51 23 this scoping review.  
52  
53  
54  
55  
56  
57  
58  
59  
60

## SCOPING REVIEW PROTOCOL

**References**

1. McGorry P. Transition to adulthood: The critical period for pre-emptive, disease-modifying care for schizophrenia and related disorders. *Schizophr Bull.* 2011 May 1;37(3):524–30.
2. Pearson, C., Janz, T., & Ali J. Mental and substance use disorders in Canada. *Health at a Glance.* Statistics Canada. Catalogue no. 82-624-X. 2013.
3. Arnett JJ, Žukauskienė R, Sugimura K. The new life stage of emerging adulthood at ages 18–29 years: Implications for mental health. *The Lancet Psychiatry.* 2014 Dec;1(7):569–76.
4. Yung, A. R., Cotter, J., & McGorry PD. *Youth Mental Health: Approaches to Emerging Mental Ill-Health in Young People.* Routledge; 2020.
5. Rehm J, Shield KD. Global burden of disease and the impact of mental and addictive disorders. *Curr Psychiatry Rep.* 2019 Feb 7;21(2):10.
6. Fusar-Poli P. Integrated mental health services for the developmental period (0 to 25 Years): A critical review of the evidence. *Front Psychiatry.* 2019 Jun 7;10.
7. Stoep, A. V., Beresford, S. A., Weiss, N. S., McKnight, B., Cauce, A. M., & Cohen P. Community-based study of the transition to adulthood for adolescents with psychiatric disorder. *Am J Epidemiol.* 2000 Aug 15;152(4):352–62.
8. Lozano R, Naghavi M, Foreman K, Lim S, Shibuya K, Aboyans V, et al. Global and regional mortality from 235 causes of death for 20 age groups in 1990 and 2010: A systematic analysis for the Global Burden of Disease Study 2010. *Lancet.* 2012 Dec;380(9859):2095–128.
9. World Health Organization. *Mental health and substance use: Suicide data [Internet].*

## SCOPING REVIEW PROTOCOL

- 1  
2  
3 1 2019. Available from: [https://www.who.int/teams/mental-health-and-substance-use/data-](https://www.who.int/teams/mental-health-and-substance-use/data-research/suicide-data)  
4  
5 2 research/suicide-data  
6  
7  
8 3 10. Burgess PM, Pirkis JE, Slade TN, Johnston AK, Meadows GN, Gunn JM. Service use for  
9  
10 4 mental health problems: Findings from the 2007 National Survey of Mental Health and  
11  
12 5 Wellbeing. *Aust New Zeal J Psychiatry*. 2009 Jul 1;43(7):615–23.  
13  
14 6 11. Mental Health Commission of Canada. Changing directions, changing lives: The mental  
15  
16 7 health strategy for Canada. 2021.  
17  
18 8 12. Ministry of Health and Long-Term Care. Respect, recovery, resilience: Recommendations  
19  
20 9 for Ontario’s mental health & addictions strategy. 2011.  
21  
22 10 13. World Health Organization. Mental health action plan 2013-2020 [Internet]. 2013.  
23  
24 11 Available from: <https://apps.who.int/iris/handle/10665/89966>  
25  
26 12 14. World Health Organization. Guidelines on mental health promotive and preventive  
27  
28 13 interventions for adolescents: Helping adolescents thrive. 2020.  
29  
30 14 15. Fine SB. Resilience and human adaptability: Who rises above adversity? *Am J Occup*  
31  
32 15 *Ther*. 1991 Jun 1;45(6):493–503.  
33  
34 16 16. Masten AS. Ordinary magic: Resilience processes in development. *Am Psychol*.  
35  
36 17 2001;56(3):227–38.  
37  
38 18 17. Luthar SS, Cicchetti D, Becker B. The construct of resilience: A critical evaluation and  
39  
40 19 guidelines for future work. *Child Dev*. 2000 May 28;71(3):543–62.  
41  
42 20 18. Ungar M. The social ecology of resilience: A handbook of theory and practice. Springer  
43  
44 21 Science & Business Media; 2011.  
45  
46 22 19. Fletcher D, Sarkar M. Psychological resilience: A review and critique of definitions,  
47  
48 23 concepts, and theory. *Eur Psychol*. 2013 Jan;18(1):12–23.  
49  
50  
51  
52  
53  
54  
55  
56  
57  
58  
59  
60

## SCOPING REVIEW PROTOCOL

- 1 20. Gillespie BM, Chaboyer W, Wallis M. Development of a theoretically derived model of  
2 resilience through concept analysis. *Contemp Nurse*. 2007 May 17;25(1-2):124-35.
- 3 21. Rutten BPF, Hammels C, Geschwind N, Menne-Lothmann C, Pishva E, Schruers K, et al.  
4 Resilience in mental health: Linking psychological and neurobiological perspectives. *Acta*  
5 *Psychiatr Scand*. 2013 Jul 14;128(1):3-20.
- 6 22. Rutter M. Resilience in the face of adversity: Protective factors and resistance to  
7 psychiatric disorder. *Br J Psychiatry*. 1985 Dec 29;147(6):598-611.
- 8 23. Schwarz S. Resilience in psychology: A critical analysis of the concept. *Theory Psychol*.  
9 2018 Aug 29;28(4):528-41.
- 10 24. Van Vliet KJ. Shame and resilience in adulthood: A grounded theory study. *J Couns*  
11 *Psychol*. 2008 Apr;55(2):233-45.
- 12 25. Nalder E, Hartman L, Hunt A, King G. Traumatic brain injury resiliency model: A  
13 conceptual model to guide rehabilitation research and practice. *Disabil Rehabil*. 2019 Oct  
14 23;41(22):2708-17.
- 15 26. Masten AS, Lucke CM, Nelson KM, Stallworthy IC. Resilience in development and  
16 psychopathology: Multisystem perspectives. *Annu Rev Clin Psychol*. 2021 May  
17 7;17(1):521-49.
- 18 27. Ungar M, Theron L. Resilience and mental health: How multisystemic processes  
19 contribute to positive outcomes. *The Lancet Psychiatry*. 2020 May;7(5):441-8.
- 20 28. Wathen CN, MacGregor JC, Hammerton J, Coben JH, Herrman H, Stewart DE, et al.  
21 Priorities for research in child maltreatment, intimate partner violence and resilience to  
22 violence exposures: Results of an international Delphi consensus development process.  
23 *BMC Public Health*. 2012 Dec 21;12(1):684.

## SCOPING REVIEW PROTOCOL

- 1  
2  
3 1 29. Stainton A, Chisholm K, Kaiser N, Rosen M, Upthegrove R, Ruhrmann S, et al.  
4  
5 2 Resilience as a multimodal dynamic process. *Early Interv Psychiatry*. 2019  
6  
7 Aug;13(4):725–32.  
8  
9  
10 4 30. Davydov DM, Stewart R, Ritchie K, Chaudieu I. Resilience and mental health. *Clin*  
11  
12 5 *Psychol Rev*. 2010 Jul;30(5):479–95.  
13  
14 6 31. Schrank B, Brownell T, Tylee A, Slade M. Positive psychology: An approach to  
15  
16 supporting recovery in mental illness. *East Asian Arch Psychiatry*. 2014 Sep;24(3):95–  
17  
18 7 103.  
19  
20 8  
21 9 32. Echezarraga A, Las Hayas C, López de Arroyabe E, Jones SH. Resilience and recovery in  
22  
23 the context of psychological disorders. *J Humanist Psychol*. 2019 May  
24  
25 10 29;002216781985162.  
26  
27 11  
28 12 33. Friesen BJ. Recovery and resilience in children’s mental health: Views from the field.  
29  
30 *Psychiatr Rehabil J*. 2007;31(1):38–48.  
31  
32 13  
33 14 34. Jacob KS. Recovery model of mental illness: A complementary approach to psychiatric  
34  
35 15 care. *Indian J Psychol Med*. 2015 Apr 1;37(2):117–9.  
36  
37 16 35. Rayner S, Thielking M, Lough R. A new paradigm of youth recovery: Implications for  
38  
39 youth mental health service provision. *Aust J Psychol*. 2018 Dec 1;70(4):330–40.  
40  
41 17  
42 18 36. Meyer PS, Gottlieb JD, Penn D, Mueser K, Gingerich S. Individual Resiliency training:  
43  
44 19 An early intervention approach to enhance well-being in people with first-episode  
45  
46 20 psychosis. *Psychiatr Ann*. 2015 Nov;45(11):554–60.  
47  
48 21 37. Oliver KG, Collin P, Burns J, Nicholas J. Building resilience in young people through  
49  
50 meaningful participation. *Aust e-Journal Adv Ment Heal*. 2006 Jan 17;5(1):34–40.  
51  
52 22  
53 23 38. Fusar-Poli P, Solmi M, Brondino N, Davies C, Chae C, Politi P, et al. Transdiagnostic

## SCOPING REVIEW PROTOCOL

- 1 psychiatry: A systematic review. *World Psychiatry*. 2019 Jun 6;18(2):192–207.
- 2
- 3 1
- 4
- 5 2 39. Fritz J, de Graaff AM, Caisley H, van Harmelen A-L, Wilkinson PO. A systematic review
- 6
- 7
- 8 3
- 9
- 10 4
- 11
- 12 40. Colquhoun HL, Levac D, O'Brien KK, Straus S, Tricco AC, Perrier L, et al. Scoping
- 13
- 14
- 15 6
- 16
- 17 7
- 18
- 19 8 41. Munn Z, Peters MDJ, Stern C, Tufanaru C, McArthur A, Aromataris E. Systematic review
- 20
- 21
- 22 9
- 23
- 24 10
- 25
- 26 11 42. Arksey H, O'Malley L. Scoping studies: Towards a methodological framework. *Int J Soc*
- 27
- 28
- 29 12
- 30
- 31 13 43. Levac D, Colquhoun H, O'Brien KK. Scoping studies: Advancing the methodology.
- 32
- 33 14
- 34
- 35 15 44. Peters MDJ, Marnie C, Tricco AC, Pollock D, Munn Z, Alexander L, et al. Updated
- 36
- 37
- 38 16
- 39
- 40 17
- 41
- 42 18 45. Tricco AC, Lillie E, Zarin W, O'Brien KK, Colquhoun H, Levac D, et al. PRISMA
- 43
- 44
- 45 19
- 46
- 47 20
- 48
- 49 21 46. Moher D, Shamseer L, Clarke M, Ghersi D, Liberati A, Petticrew M, et al. Preferred
- 50
- 51
- 52 22
- 53
- 54 23
- 55
- 56
- 57
- 58
- 59
- 60

## SCOPING REVIEW PROTOCOL

- 1  
2  
3 1 47. McGorry P, Bates T, Birchwood M. Designing youth mental health services for the 21st  
4  
5 2 century: Examples from Australia, Ireland and the UK. *Br J Psychiatry*. 2013 Jan  
6  
7 3 2;202(s54):s30–5.  
8  
9  
10 4 48. Mueser KT, Penn DL, Addington J, Brunette MF, Gingerich S, Glynn SM, et al. The  
11  
12 5 NAVIGATE program for first-episode psychosis: Rationale, overview, and description of  
13  
14 6 psychosocial components. *Psychiatr Serv*. 2015 Jul;66(7):680–90.  
15  
16  
17 7 49. Perovic B. Defining youth in contemporary national legal and policy framework across  
18  
19 8 Europe. Partnership between the European Commission and the Council of Europe in the  
20  
21 9 field of youth. 2016.  
22  
23  
24 10 50. United Nations. Definition of youth [Internet]. 2013. Available from: [http://www.un.org/](http://www.un.org/esa/socdev/documents/youth/fact-sheets/youth-definition.pdf)  
25  
26 11 [esa/socdev/documents/youth/fact-sheets/youth-definition.pdf](http://www.un.org/esa/socdev/documents/youth/fact-sheets/youth-definition.pdf).  
27  
28  
29 12 51. National Institute of Mental Health. Mental illness [Internet]. 2021. Available from:  
30  
31 13 <https://www.nimh.nih.gov/health/statistics/mental-illness.shtml#:~:text=Serious mental>  
32  
33 14 [illness \(SMI\) is,or more major life activities](https://www.nimh.nih.gov/health/statistics/mental-illness.shtml#:~:text=Serious mental)  
34  
35  
36 15 52. Substance Abuse and Mental Health Services Administration. Behind the term: Serious  
37  
38 16 mental illness. Development Services Group, Inc. [Internet]. 2016. Available from:  
39  
40 17 <https://www.hsdl.org/?abstract&did=801613>  
41  
42  
43 18 53. Substance Abuse and Mental Health Services Administration. Adults with SMI and  
44  
45 19 children/youth with SED. U.S. Department of Health and Human Services. 2020;  
46  
47 20 54. McGowan J, Sampson M, Salzwedel DM, Cogo E, Foerster V, Lefebvre C. PRESS peer  
48  
49 21 review of electronic search strategies: 2015 guideline statement. *J Clin Epidemiol*. 2016  
50  
51 22 Jul;75:40–6.  
52  
53  
54 23 55. Veritas Health Innovation. Covidence systematic review software [Internet]. 2021.  
55  
56  
57  
58  
59  
60

## SCOPING REVIEW PROTOCOL

- 1 Available from: [www.covidence.org](http://www.covidence.org)
- 2
- 3 1
- 4
- 5 2 56. Raanaas RK, Bjøntegaard HØ, Shaw L. A scoping review of participatory action research
- 6
- 7 to promote mental health and resilience in youth and adolescents. *Adolesc Res Rev*. 2020
- 8
- 9 Jun 1;5(2):137–52.
- 10
- 11 4
- 12 57. McGorry PD, Mei C. Early intervention in youth mental health: Progress and future
- 13
- 14 directions. *Evid Based Ment Heal*. 2018 Nov;21(4):182–4.
- 15
- 16 6
- 17 58. Greenhalgh T, Robert G, Macfarlane F, Bate P, Kyriakidou O, Peacock R. Storylines of
- 18
- 19 research in diffusion of innovation: A meta-narrative approach to systematic review. *Soc*
- 20
- 21 *Sci Med*. 2005 Jul;61(2):417–30.
- 22
- 23 9
- 24 10 59. Barry CA, Britten N, Barber N, Bradley C, Stevenson F. Using reflexivity to optimize
- 25
- 26 teamwork in qualitative research. *Qual Health Res*. 1999 Jan 1;9(1):26–44.
- 27
- 28 11
- 29 12 60. Finlay L. Negotiating the swamp: The opportunity and challenge of reflexivity in research
- 30
- 31 practice. *Qual Res*. 2002 Aug 17;2(2):209–30.
- 32
- 33 14 61. Jacobson D, Mustafa N. Social identity map: A reflexivity tool for practicing explicit
- 34
- 35 positionality in critical qualitative research. *Int J Qual Methods*. 2019 Jan
- 36
- 37 1;18:160940691987007.
- 38
- 39 16
- 40 17 62. Keown K, Van Eerd D, Irvin E. Stakeholder engagement opportunities in systematic
- 41
- 42 reviews: Knowledge transfer for policy and practice. *J Contin Educ Health Prof*.
- 43
- 44 2008;28(2):67–72.
- 45
- 46 19
- 47 20 63. Sabiston CM, Vani M, DeJonge M, Nesbitt A. Scoping reviews and rapid reviews. *Int Rev*
- 48
- 49 *Sport Exerc Psychol*. 2022.
- 50
- 51 22 64. Hennink MM, Kaiser BN, Weber MB. What influences saturation? Estimating sample
- 52
- 53 sizes in focus group research. *Qual Health Res*. 2019;29(10):1483–96.
- 54
- 55
- 56
- 57
- 58
- 59
- 60



## SCOPING REVIEW PROTOCOL

- 1  
2  
3 1 65. O'Brien K, Wilkins A, Zack E, Solomon P. Scoping the Field: Identifying Key Research  
4  
5 2 Priorities in HIV and Rehabilitation. *AIDS Behav.* 2010 Apr 10;14(2):448–58.  
6  
7 3 66. Hsieh H-F, Shannon SE. Three approaches to qualitative content analysis. *Qual Health*  
8  
9 4 Res. 2005 Nov 1;15(9):1277–88.  
10  
11 5 67. Graneheim U., Lundman B. Qualitative content analysis in nursing research: Concepts,  
12  
13 6 procedures and measures to achieve trustworthiness. *Nurse Educ Today.* 2004  
14  
15 7 Feb;24(2):105–12.  
16  
17 8 68. Elo S, Kääriäinen M, Kanste O, Pölkki T, Utriainen K, Kyngäs H. Qualitative content  
18  
19 9 analysis: A focus on trustworthiness. *SAGE Open.* 2014 Jan 1;4(1):215824401452263.  
20  
21 10 69. Hutcheon E, Lashewicz B. Theorizing resilience: Critiquing and unbounding a  
22  
23 11 marginalizing concept. *Disabil Soc.* 2014 Oct 21;29(9):1383–97.  
24  
25 12 70. McCrae N. The weaponizing of mental health. *J Adv Nurs.* 2019 Apr 24;75(4):709–10.  
26  
27 13 71. Shalanski L, Ewashen C. An interpretive phenomenological study of recovering from  
28  
29 14 mental illness: Teenage girls' portrayals of resilience. *Int J Ment Health Nurs.* 2019 Apr  
30  
31 15 24;28(2):492–500.  
32  
33  
34  
35  
36  
37  
38  
39  
40  
41  
42  
43  
44  
45  
46  
47  
48  
49  
50  
51  
52  
53  
54  
55  
56  
57  
58  
59  
60

## SCOPING REVIEW PROTOCOL

## Appendix A

## PRISMA-P Checklist

|                           |                     |                                                                                                                                                                                                                               | Page   |
|---------------------------|---------------------|-------------------------------------------------------------------------------------------------------------------------------------------------------------------------------------------------------------------------------|--------|
|                           |                     |                                                                                                                                                                                                                               | Number |
| <hr/>                     |                     |                                                                                                                                                                                                                               |        |
| Reporting Item            |                     |                                                                                                                                                                                                                               |        |
| <hr/>                     |                     |                                                                                                                                                                                                                               |        |
| <b>Title</b>              |                     |                                                                                                                                                                                                                               |        |
| Identification            | <a href="#">#1a</a> | Identify the report as a protocol of a systematic review                                                                                                                                                                      | 2      |
| Update                    | <a href="#">#1b</a> | If the protocol is for an update of a previous systematic review, identify as such                                                                                                                                            | N/A    |
| <b>Registration</b>       |                     |                                                                                                                                                                                                                               |        |
|                           | <a href="#">#2</a>  | If registered, provide the name of the registry (such as PROSPERO) and registration number                                                                                                                                    | 2, 8   |
| <b>Authors</b>            |                     |                                                                                                                                                                                                                               |        |
| Contact                   | <a href="#">#3a</a> | Provide name, institutional affiliation, e-mail address of all protocol authors; provide physical mailing address of corresponding author                                                                                     | 1      |
| Contribution              | <a href="#">#3b</a> | Describe contributions of protocol authors and identify the guarantor of the review                                                                                                                                           | 1, 23  |
| <b>Amendments</b>         |                     |                                                                                                                                                                                                                               |        |
|                           | <a href="#">#4</a>  | If the protocol represents an amendment of a previously completed or published protocol, identify as such and list changes; otherwise, state plan for documenting important protocol amendments                               | N/A    |
| <b>Support</b>            |                     |                                                                                                                                                                                                                               |        |
| Sources                   | <a href="#">#5a</a> | Indicate sources of financial or other support for the review                                                                                                                                                                 | --     |
| Sponsor                   | <a href="#">#5b</a> | Provide name for the review funder and / or sponsor                                                                                                                                                                           | --     |
| Role of sponsor or funder | <a href="#">#5c</a> | Describe roles of funder(s), sponsor(s), and / or institution(s), if any, in developing the protocol                                                                                                                          | --     |
| <b>Introduction</b>       |                     |                                                                                                                                                                                                                               |        |
| Rationale                 | <a href="#">#6</a>  | Describe the rationale for the review in the context of what is already known                                                                                                                                                 | 4-7    |
| Objectives                | <a href="#">#7</a>  | Provide an explicit statement of the question(s) the review will address with reference to participants, interventions, comparators, and outcomes (PICO)                                                                      | 8-10   |
| <b>Methods</b>            |                     |                                                                                                                                                                                                                               |        |
| Eligibility criteria      | <a href="#">#8</a>  | Specify the study characteristics (such as PICO, study design, setting, time frame) and report characteristics (such as years considered, language, publication status) to be used as criteria for eligibility for the review | 11-14  |

## SCOPING REVIEW PROTOCOL

|                                         |                      |                                                                                                                                                                                                                                                           |            |
|-----------------------------------------|----------------------|-----------------------------------------------------------------------------------------------------------------------------------------------------------------------------------------------------------------------------------------------------------|------------|
| Information sources                     | <a href="#">#9</a>   | Describe all intended information sources (such as electronic databases, contact with study authors, trial registers or other grey literature sources) with planned dates of coverage                                                                     | 11-12      |
| Search strategy                         | <a href="#">#10</a>  | Present draft of search strategy to be used for at least one electronic database, including planned limits, such that it could be repeated                                                                                                                | Appendix B |
| Study records - data management         | <a href="#">#11a</a> | Describe the mechanism(s) that will be used to manage records and data throughout the review                                                                                                                                                              | 12         |
| Study records - selection process       | <a href="#">#11b</a> | State the process that will be used for selecting studies (such as two independent reviewers) through each phase of the review (that is, screening, eligibility and inclusion in meta-analysis)                                                           | 12-14      |
| Study records - data collection process | <a href="#">#11c</a> | Describe planned method of extracting data from reports (such as piloting forms, done independently, in duplicate), any processes for obtaining and confirming data from investigators                                                                    | 15-17      |
| Data items                              | <a href="#">#12</a>  | List and define all variables for which data will be sought (such as PICO items, funding sources), any pre-planned data assumptions and simplifications                                                                                                   | 15-17      |
| Outcomes and prioritization             | <a href="#">#13</a>  | List and define all outcomes for which data will be sought, including prioritization of main and additional outcomes, with rationale                                                                                                                      | 15-17      |
| Risk of bias in individual studies      | <a href="#">#14</a>  | Describe anticipated methods for assessing risk of bias of individual studies, including whether this will be done at the outcome or study level, or both; state how this information will be used in data synthesis                                      | See note 1 |
| Data synthesis                          | <a href="#">#15a</a> | Describe criteria under which study data will be quantitatively synthesised                                                                                                                                                                               | 17-18      |
| Data synthesis                          | <a href="#">#15b</a> | If data are appropriate for quantitative synthesis, describe planned summary measures, methods of handling data and methods of combining data from studies, including any planned exploration of consistency (such as I <sup>2</sup> , Kendall's $\tau$ ) | N/A        |
| Data synthesis                          | <a href="#">#15c</a> | Describe any proposed additional analyses (such as sensitivity or subgroup analyses, meta-regression)                                                                                                                                                     | N/A        |
| Data synthesis                          | <a href="#">#15d</a> | If quantitative synthesis is not appropriate, describe the type of summary planned                                                                                                                                                                        | 17-18      |

## SCOPING REVIEW PROTOCOL

|    |               |                     |                                                     |            |
|----|---------------|---------------------|-----------------------------------------------------|------------|
| 1  |               |                     |                                                     |            |
| 2  |               |                     |                                                     |            |
| 3  | Meta-bias(es) | <a href="#">#16</a> | Specify any planned assessment of meta-bias(es)     | See note 2 |
| 4  |               |                     | (such as publication bias across studies, selective |            |
| 5  |               |                     | reporting within studies)                           |            |
| 6  |               |                     |                                                     |            |
| 7  | Confidence in | <a href="#">#17</a> | Describe how the strength of the body of evidence   | See note 3 |
| 8  | cumulative    |                     | will be assessed (such as GRADE)                    |            |
| 9  | evidence      |                     |                                                     |            |
| 10 |               |                     |                                                     |            |

---

**Author notes**

1. N/A for scoping reviews
2. N/A for scoping reviews
3. N/A for scoping reviews

Citation: Moher D, Shamseer L, Clarke M, Ghersi D, Liberati A, Petticrew M, Shekelle P, Stewart LA. Preferred Reporting Items for Systematic Review and Meta-Analysis Protocols (PRISMA-P) 2015 statement. Syst Rev. 2015;4(1):1.

The PRISMA-P elaboration and explanation paper is distributed under the terms of the Creative Commons Attribution License CC-BY. This checklist can be completed online using <https://www.goodreports.org/>, a tool made by the [EQUATOR Network](#) in collaboration with [Penelope.ai](#)

SCOPING REVIEW PROTOCOL

Appendix B

Medline Database Search Strategy

| Search line # | PCC conceptual term of interest     | Search term entered into OVID-Medline                                                                                                                                                                                                                                                                                                                                                                                                                                                                                                                                                                                                                                                                                                                                                                                                                                                                                                                                                                                                                                                                                                                                                      |
|---------------|-------------------------------------|--------------------------------------------------------------------------------------------------------------------------------------------------------------------------------------------------------------------------------------------------------------------------------------------------------------------------------------------------------------------------------------------------------------------------------------------------------------------------------------------------------------------------------------------------------------------------------------------------------------------------------------------------------------------------------------------------------------------------------------------------------------------------------------------------------------------------------------------------------------------------------------------------------------------------------------------------------------------------------------------------------------------------------------------------------------------------------------------------------------------------------------------------------------------------------------------|
| 1             | Population (Transition-age youth)   | exp Adolescent/ or exp Young Adult/                                                                                                                                                                                                                                                                                                                                                                                                                                                                                                                                                                                                                                                                                                                                                                                                                                                                                                                                                                                                                                                                                                                                                        |
| 2             | Population (Transition-age youth)   | (youth* or transition age youth* or teen* or adolescen* or emerging adult* or young adult* or early adult* or young person* or young people* or juvenile*).tw,kf.                                                                                                                                                                                                                                                                                                                                                                                                                                                                                                                                                                                                                                                                                                                                                                                                                                                                                                                                                                                                                          |
| 3             | Population (Serious mental illness) | exp Mental Disorders/ or exp Anxiety Disorders/ or exp "Bipolar and Related Disorders"/ or exp Dissociative Disorders/ or exp "Feeding and Eating Disorders"/ or exp Mood Disorders/ or exp "Attention Deficit and Disruptive Behavior Disorders"/ or exp Personality Disorders/ or exp Schizophrenia/ or exp Psychotic Disorders/ or exp Affective Disorders, Psychotic/ or exp Capgras Syndrome/ or exp Delusional Parasitosis/ or exp Morgellons Disease/ or exp Paranoid Disorders/ or exp Somatoform Disorders/ or exp "Trauma and Stressor Related Disorders"/ or exp Mentally Ill Persons/                                                                                                                                                                                                                                                                                                                                                                                                                                                                                                                                                                                          |
| 4             | Population (Serious mental illness) | (mental disorder* or mental illness* or psychiatric disabilit* or psychiatric disorder* or psychiatric diagnosis* or serious emotional disturbance* or severe emotional disturbance* or "mental health condition*" or anxiety disorder* or phobia* or phobic disorder* or panic disorder* or obsessive-compulsive disorder* or OCD or bipolar disorder* or manic disorder* or manic depression or dissociative disorder* or multiple-personality disorder or eating disorder* or anorexi* or bulimi* or binge eating* or "eating disorder not otherwise specified" or EDNOS or "other specified feeding or eating disorder" or OSFED or disordered eating or mood disorder* or depressive disorder* or affective disorder* or depression or cyclothymic disorder* or cyclothymia or dysthymic disorder* or dysthymia or personality disorder* or schizophrenia spectrum disorder* or schizophrenia or psychotic disorder* or psychosis or psychoses or schizoaffective disorder* or psychotic affective disorder* or paranoid disorder* or somatoform disorder* or body dysmorphic disorder* or body dysmorphi* or post-traumatic stress disorder* or adjustment disorder* or PTSD).tw,kf. |
| 5             | Concept (Resilience)                | exp Resilience, Psychological/                                                                                                                                                                                                                                                                                                                                                                                                                                                                                                                                                                                                                                                                                                                                                                                                                                                                                                                                                                                                                                                                                                                                                             |
| 6             | Concept (Resilience)                | (resilienc*).tw,kf.                                                                                                                                                                                                                                                                                                                                                                                                                                                                                                                                                                                                                                                                                                                                                                                                                                                                                                                                                                                                                                                                                                                                                                        |
| 7             |                                     | 1 or 2                                                                                                                                                                                                                                                                                                                                                                                                                                                                                                                                                                                                                                                                                                                                                                                                                                                                                                                                                                                                                                                                                                                                                                                     |
| 8             |                                     | 3 or 4                                                                                                                                                                                                                                                                                                                                                                                                                                                                                                                                                                                                                                                                                                                                                                                                                                                                                                                                                                                                                                                                                                                                                                                     |
| 9             |                                     | 5 or 6                                                                                                                                                                                                                                                                                                                                                                                                                                                                                                                                                                                                                                                                                                                                                                                                                                                                                                                                                                                                                                                                                                                                                                                     |
| 10            |                                     | 7 and 8 and 9                                                                                                                                                                                                                                                                                                                                                                                                                                                                                                                                                                                                                                                                                                                                                                                                                                                                                                                                                                                                                                                                                                                                                                              |
| 11            |                                     | limit 10 to (english language and humans and yr="2000 - Current")                                                                                                                                                                                                                                                                                                                                                                                                                                                                                                                                                                                                                                                                                                                                                                                                                                                                                                                                                                                                                                                                                                                          |

## SCOPING REVIEW PROTOCOL

## Embase Database Search Strategy

| Search line # | PCC conceptual term of interest     | Search term entered into OVID-Embase                                                                                                                                                                                                                                                                                                                                                                                                                                                                                                                                                                                                                                                                                                                                                                                                                                                                                                                                                                                                                                                                                                                                                       |
|---------------|-------------------------------------|--------------------------------------------------------------------------------------------------------------------------------------------------------------------------------------------------------------------------------------------------------------------------------------------------------------------------------------------------------------------------------------------------------------------------------------------------------------------------------------------------------------------------------------------------------------------------------------------------------------------------------------------------------------------------------------------------------------------------------------------------------------------------------------------------------------------------------------------------------------------------------------------------------------------------------------------------------------------------------------------------------------------------------------------------------------------------------------------------------------------------------------------------------------------------------------------|
| 1             | Population (Transition-age youth)   | exp Adolescent/ or exp Young Adult/                                                                                                                                                                                                                                                                                                                                                                                                                                                                                                                                                                                                                                                                                                                                                                                                                                                                                                                                                                                                                                                                                                                                                        |
| 2             | Population (Transition-age youth)   | (youth* or transition age youth* or teen* or adolescen* or emerging adult* or young adult* or early adult* or young person* or young people* or juvenile*).tw,kf.                                                                                                                                                                                                                                                                                                                                                                                                                                                                                                                                                                                                                                                                                                                                                                                                                                                                                                                                                                                                                          |
| 3             | Population (Serious mental illness) | exp Mental Disease/ or exp Anxiety Disorder/ or exp Bipolar Disorder/ or exp Dissociative Disorder/ or exp Eating Disorder/ or exp Emotional Disorder/ or exp Mood Disorder/ or exp Attention Deficit Disorder/ or exp Impulse Control Disorder/ or exp Neurosis/ or exp Personality Disorder/ or exp Schizophrenia Spectrum Disorder/ or exp Schizophrenia/ or exp Psychosis/ or exp Somatoform Disorder/ or exp Posttraumatic Stress Disorder/                                                                                                                                                                                                                                                                                                                                                                                                                                                                                                                                                                                                                                                                                                                                           |
| 4             | Population (Serious mental illness) | (mental disorder* or mental illness* or psychiatric disabilit* or psychiatric disorder* or psychiatric diagnosis* or serious emotional disturbance* or severe emotional disturbance* or "mental health condition*" or anxiety disorder* or phobia* or phobic disorder* or panic disorder* or obsessive-compulsive disorder* or OCD or bipolar disorder* or manic disorder* or manic depression or dissociative disorder* or multiple-personality disorder or eating disorder* or anorexi* or bulimi* or binge eating* or "eating disorder not otherwise specified" or EDNOS or "other specified feeding or eating disorder" or OSFED or disordered eating or mood disorder* or depressive disorder* or affective disorder* or depression or cyclothymic disorder* or cyclothymia or dysthymic disorder* or dysthymia or personality disorder* or schizophrenia spectrum disorder* or schizophrenia or psychotic disorder* or psychosis or psychoses or schizoaffective disorder* or psychotic affective disorder* or paranoid disorder* or somatoform disorder* or body dysmorphic disorder* or body dysmorphi* or post-traumatic stress disorder* or adjustment disorder* or PTSD).tw,kf. |
| 5             | Concept (Resilience)                | exp Psychological Resilience/                                                                                                                                                                                                                                                                                                                                                                                                                                                                                                                                                                                                                                                                                                                                                                                                                                                                                                                                                                                                                                                                                                                                                              |
| 6             | Concept (Resilience)                | (resilienc*).tw,kf.                                                                                                                                                                                                                                                                                                                                                                                                                                                                                                                                                                                                                                                                                                                                                                                                                                                                                                                                                                                                                                                                                                                                                                        |
| 7             |                                     | 1 or 2                                                                                                                                                                                                                                                                                                                                                                                                                                                                                                                                                                                                                                                                                                                                                                                                                                                                                                                                                                                                                                                                                                                                                                                     |
| 8             |                                     | 3 or 4                                                                                                                                                                                                                                                                                                                                                                                                                                                                                                                                                                                                                                                                                                                                                                                                                                                                                                                                                                                                                                                                                                                                                                                     |
| 9             |                                     | 5 or 6                                                                                                                                                                                                                                                                                                                                                                                                                                                                                                                                                                                                                                                                                                                                                                                                                                                                                                                                                                                                                                                                                                                                                                                     |
| 10            |                                     | 7 and 8 and 9                                                                                                                                                                                                                                                                                                                                                                                                                                                                                                                                                                                                                                                                                                                                                                                                                                                                                                                                                                                                                                                                                                                                                                              |
| 11            |                                     | limit 10 to (english language and humans and yr="2000 - Current")                                                                                                                                                                                                                                                                                                                                                                                                                                                                                                                                                                                                                                                                                                                                                                                                                                                                                                                                                                                                                                                                                                                          |

SCOPING REVIEW PROTOCOL

PsychINFO Database Search Strategy

| Search line # | PCC conceptual term of interest     | Search term entered into OVID-PsychINFO                                                                                                                                                                                                                                                                                                                                                                                                                                                                                                                                                                                                                                                                                                                                                                                                                                                                                                                                                                                                                                                                                                                                                 |
|---------------|-------------------------------------|-----------------------------------------------------------------------------------------------------------------------------------------------------------------------------------------------------------------------------------------------------------------------------------------------------------------------------------------------------------------------------------------------------------------------------------------------------------------------------------------------------------------------------------------------------------------------------------------------------------------------------------------------------------------------------------------------------------------------------------------------------------------------------------------------------------------------------------------------------------------------------------------------------------------------------------------------------------------------------------------------------------------------------------------------------------------------------------------------------------------------------------------------------------------------------------------|
| 1             | Population (Transition-age youth)   | exp Emerging Adulthood/ or exp Early Adolescence/                                                                                                                                                                                                                                                                                                                                                                                                                                                                                                                                                                                                                                                                                                                                                                                                                                                                                                                                                                                                                                                                                                                                       |
| 2             | Population (Transition-age youth)   | (youth* or transition age youth* or teen* or adolescen* or emerging adult* or young adult* or early adult* or young person* or young people* or juvenile*).tw.                                                                                                                                                                                                                                                                                                                                                                                                                                                                                                                                                                                                                                                                                                                                                                                                                                                                                                                                                                                                                          |
| 3             | Population (Serious mental illness) | exp Mental Disorders/ or exp Chronic Mental Illness or exp Serious Mental Illness/ or exp Affective Disorders or exp Anxiety Disorders/ or exp Attention Deficit Disorder/ or exp Bipolar Disorder/ or exp Dissociative Disorders/ or exp Disruptive Behavior Disorders/ or exp Eating Disorders/ or exp Personality Disorders/ or exp Psychosis/ or exp Schizophrenia/ or exp Somatoform Disorders/ or exp "Stress and Trauma Related Disorders"/                                                                                                                                                                                                                                                                                                                                                                                                                                                                                                                                                                                                                                                                                                                                      |
| 4             | Population (Serious mental illness) | (mental disorder* or mental illness* or psychiatric disabilit* or psychiatric disorder* or psychiatric diagnosis* or serious emotional disturbance* or severe emotional disturbance* or "mental health condition*" or anxiety disorder* or phobia* or phobic disorder* or panic disorder* or obsessive-compulsive disorder* or OCD or bipolar disorder* or manic disorder* or manic depression or dissociative disorder* or multiple-personality disorder or eating disorder* or anorexi* or bulimi* or binge eating* or "eating disorder not otherwise specified" or EDNOS or "other specified feeding or eating disorder" or OSFED or disordered eating or mood disorder* or depressive disorder* or affective disorder* or depression or cyclothymic disorder* or cyclothymia or dysthymic disorder* or dysthymia or personality disorder* or schizophrenia spectrum disorder* or schizophrenia or psychotic disorder* or psychosis or psychoses or schizoaffective disorder* or psychotic affective disorder* or paranoid disorder* or somatoform disorder* or body dysmorphic disorder* or body dysmorphi* or post-traumatic stress disorder* or adjustment disorder* or PTSD).tw. |
| 5             | Concept (Resilience)                | exp "Resilience (Psychological)"/                                                                                                                                                                                                                                                                                                                                                                                                                                                                                                                                                                                                                                                                                                                                                                                                                                                                                                                                                                                                                                                                                                                                                       |
| 6             | Concept (Resilience)                | (resilienc*).tw.                                                                                                                                                                                                                                                                                                                                                                                                                                                                                                                                                                                                                                                                                                                                                                                                                                                                                                                                                                                                                                                                                                                                                                        |
| 7             |                                     | 1 or 2                                                                                                                                                                                                                                                                                                                                                                                                                                                                                                                                                                                                                                                                                                                                                                                                                                                                                                                                                                                                                                                                                                                                                                                  |
| 8             |                                     | 3 or 4                                                                                                                                                                                                                                                                                                                                                                                                                                                                                                                                                                                                                                                                                                                                                                                                                                                                                                                                                                                                                                                                                                                                                                                  |
| 9             |                                     | 5 or 6                                                                                                                                                                                                                                                                                                                                                                                                                                                                                                                                                                                                                                                                                                                                                                                                                                                                                                                                                                                                                                                                                                                                                                                  |
| 10            |                                     | 7 and 8 and 9                                                                                                                                                                                                                                                                                                                                                                                                                                                                                                                                                                                                                                                                                                                                                                                                                                                                                                                                                                                                                                                                                                                                                                           |
| 11            |                                     | limit 10 to (english language and humans and yr="2000 - Current")                                                                                                                                                                                                                                                                                                                                                                                                                                                                                                                                                                                                                                                                                                                                                                                                                                                                                                                                                                                                                                                                                                                       |

## SCOPING REVIEW PROTOCOL

## AMED Database Search Strategy

| Search line # | PCC conceptual term of interest     | Search term entered into OVID-AMED                                                                                                                                                                                                                                                                                                                                                                                                                                                                                                                                                                                                                                                                                                                                                                                                                                                                                                                                                                                                                                                                                                                                                         |
|---------------|-------------------------------------|--------------------------------------------------------------------------------------------------------------------------------------------------------------------------------------------------------------------------------------------------------------------------------------------------------------------------------------------------------------------------------------------------------------------------------------------------------------------------------------------------------------------------------------------------------------------------------------------------------------------------------------------------------------------------------------------------------------------------------------------------------------------------------------------------------------------------------------------------------------------------------------------------------------------------------------------------------------------------------------------------------------------------------------------------------------------------------------------------------------------------------------------------------------------------------------------|
| 1             | Population (Transition-age youth)   | exp Adolescent/                                                                                                                                                                                                                                                                                                                                                                                                                                                                                                                                                                                                                                                                                                                                                                                                                                                                                                                                                                                                                                                                                                                                                                            |
| 2             | Population (Transition-age youth)   | (youth* or transition age youth* or teen* or adolescen* or emerging adult* or young adult* or early adult* or young person* or young people* or juvenile*).tw,et.                                                                                                                                                                                                                                                                                                                                                                                                                                                                                                                                                                                                                                                                                                                                                                                                                                                                                                                                                                                                                          |
| 3             | Population (Serious mental illness) | exp Mental Disorders/ or exp Adjustment Disorders/ or exp Affective Disorders/ or exp Affective Disorders Psychotic/ or exp Bipolar Disorder/ or exp Manic Disorder/ or exp Depressive Disorder/ or exp Mood Disorders/ or exp Anxiety Disorders/ or exp Obsessive Compulsive Disorder/ or exp Phobic Disorders/ or exp Stress Disorders Post Traumatic/ or exp Attention Deficit Disorder with Hyperactivity or exp Child Behavior Disorders/ or exp Dissociative Disorders/ or exp Multiple Personality Disorder/ or exp Eating Disorders/ or exp Anorexia Nervosa/ or exp Bulimia/ or exp Neurotic Disorders/ or exp Personality Disorders/ or exp Borderline Personality Disorder/ or exp Hysteria/ or exp Psychotic Disorders/ or exp Schizophrenia/ or exp Somatoform Disorders/ or exp Conversion Disorder/                                                                                                                                                                                                                                                                                                                                                                         |
| 4             | Population (Serious mental illness) | (mental disorder* or mental illness* or psychiatric disabilit* or psychiatric disorder* or psychiatric diagnosis* or serious emotional disturbance* or severe emotional disturbance* or "mental health condition*" or anxiety disorder* or phobia* or phobic disorder* or panic disorder* or obsessive-compulsive disorder* or OCD or bipolar disorder* or manic disorder* or manic depression or dissociative disorder* or multiple-personality disorder or eating disorder* or anorexi* or bulimi* or binge eating* or "eating disorder not otherwise specified" or EDNOS or "other specified feeding or eating disorder" or OSFED or disordered eating or mood disorder* or depressive disorder* or affective disorder* or depression or cyclothymic disorder* or cyclothymia or dysthymic disorder* or dysthymia or personality disorder* or schizophrenia spectrum disorder* or schizophrenia or psychotic disorder* or psychosis or psychoses or schizoaffective disorder* or psychotic affective disorder* or paranoid disorder* or somatoform disorder* or body dysmorphic disorder* or body dysmorphi* or post-traumatic stress disorder* or adjustment disorder* or PTSD).tw,et. |
| 5             | Concept (Resilience)                | exp Adaptation Psychological/                                                                                                                                                                                                                                                                                                                                                                                                                                                                                                                                                                                                                                                                                                                                                                                                                                                                                                                                                                                                                                                                                                                                                              |
| 6             | Concept (Resilience)                | (resilienc*).tw,et.                                                                                                                                                                                                                                                                                                                                                                                                                                                                                                                                                                                                                                                                                                                                                                                                                                                                                                                                                                                                                                                                                                                                                                        |
| 7             |                                     | 1 or 2                                                                                                                                                                                                                                                                                                                                                                                                                                                                                                                                                                                                                                                                                                                                                                                                                                                                                                                                                                                                                                                                                                                                                                                     |
| 8             |                                     | 3 or 4                                                                                                                                                                                                                                                                                                                                                                                                                                                                                                                                                                                                                                                                                                                                                                                                                                                                                                                                                                                                                                                                                                                                                                                     |
| 9             |                                     | 5 or 6                                                                                                                                                                                                                                                                                                                                                                                                                                                                                                                                                                                                                                                                                                                                                                                                                                                                                                                                                                                                                                                                                                                                                                                     |
| 10            |                                     | 7 and 8 and 9                                                                                                                                                                                                                                                                                                                                                                                                                                                                                                                                                                                                                                                                                                                                                                                                                                                                                                                                                                                                                                                                                                                                                                              |
| 11            |                                     | limit 10 to (english and yr="2000 -Current")                                                                                                                                                                                                                                                                                                                                                                                                                                                                                                                                                                                                                                                                                                                                                                                                                                                                                                                                                                                                                                                                                                                                               |



SCOPING REVIEW PROTOCOL

CINHAL Database Search Strategy

| Search line # | PCC conceptual term of interest     | Search term entered into CINHAL (EBSCO)                                                                                                                                                                                                                                                                                                                                                                                                                                                                                                                                                                                                                                                                                                                                                                                                                                                                                                                                                                                                                                                                                                                                                                                                                                                                                                                                                                                                                                                                                                                        |
|---------------|-------------------------------------|----------------------------------------------------------------------------------------------------------------------------------------------------------------------------------------------------------------------------------------------------------------------------------------------------------------------------------------------------------------------------------------------------------------------------------------------------------------------------------------------------------------------------------------------------------------------------------------------------------------------------------------------------------------------------------------------------------------------------------------------------------------------------------------------------------------------------------------------------------------------------------------------------------------------------------------------------------------------------------------------------------------------------------------------------------------------------------------------------------------------------------------------------------------------------------------------------------------------------------------------------------------------------------------------------------------------------------------------------------------------------------------------------------------------------------------------------------------------------------------------------------------------------------------------------------------|
| 1             | Population (Transition-age youth)   | (MH "Adolescence+") OR (MH "Young Adult")                                                                                                                                                                                                                                                                                                                                                                                                                                                                                                                                                                                                                                                                                                                                                                                                                                                                                                                                                                                                                                                                                                                                                                                                                                                                                                                                                                                                                                                                                                                      |
| 2             | Population (Transition-age youth)   | TI (youth* or "transition age youth*" or teen* or adolescen* or "emerging adult*" or "young adult*" or "early adult*" or "young person*" or "young people*" or juvenile*) OR AB (youth* or "transition age youth*" or teen* or adolescen* or "emerging adult*" or "young adult*" or "early adult*" or "young person*" or "young people*" or juvenile*)                                                                                                                                                                                                                                                                                                                                                                                                                                                                                                                                                                                                                                                                                                                                                                                                                                                                                                                                                                                                                                                                                                                                                                                                         |
| 3             | Population (Serious mental illness) | (MH "Mental Disorders+") or (MH "Mental Disorders, Chronic") or (MH "Neurotic Disorders+") or (MH "Affective Disorders+") or (MH "Seasonal Affective Disorder") or (MH "Depression+") or (MH "Anxiety Disorders+") or (MH "Social Anxiety Disorders") or (MH "Generalized Anxiety Disorder") or (MH "Panic Disorder") or (MH "Obsessive-Compulsive Disorder+") or (MH "Phobic Disorders+") or (MH "Stress Disorders, Post-Traumatic+") or (MH "Psychotic Disorders+") or (MH "Schizophrenia+") or (MH "Affective Disorders, Psychotic+") or (MH "Bipolar Disorders+") or (MH "Dissociative Disorders+") or (MH "Multiple-Personality Disorder") or (MH "Personality Disorders+") or (MH "Adjustment Disorders+") or (MH "Attention Deficit Hyperactivity Disorder") or (MH "Child Behavior Disorders+") or (MH "Eating Disorders+") or (MH "Binge Eating Disorder") or (MH "Avoidant Restrictive Food Intake Disorder") or (MH "Bulimia Nervosa") or (MH "Bulimia") or (MH "Anorexia Nervosa") or (MH "Anorexia") or (MH "Somatoform Disorders+") or (MH "Body Dysmorphic Disorder")                                                                                                                                                                                                                                                                                                                                                                                                                                                                           |
| 4             | Population (Serious mental illness) | TI ("mental disorder*" or "mental illness*" or "psychiatric disabilit*" or "psychiatric disorder*" or "psychiatric diagnosis*" or "serious emotional disturbance*" or "severe emotional disturbance*" or "mental health condition*" or "anxiety disorder*" or phobia* or "phobic disorder*" or "panic disorder*" or "obsessive-compulsive disorder*" or OCD or "bipolar disorder*" or "manic disorder*" or "manic depression" or "dissociative disorder*" or "multiple-personality disorder" or "eating disorder*" or anorexi* or bulimi* or "binge eating*" or "eating disorder not otherwise specified" or EDNOS or "other specified feeding or eating disorder" or OSFED or "disordered eating" or "mood disorder*" or "depressive disorder*" or "affective disorder*" or depression or "cyclothymic disorder*" or cyclothymia or "dysthymic disorder*" or dysthymia or "personality disorder*" or "schizophrenia spectrum disorder*" or schizophrenia or "psychotic disorder*" or psychosis or psychoses or "schizoaffective disorder*" or "psychotic affective disorder*" or "paranoid disorder*" or "somatoform disorder*" or "body dysmorphic disorder*" or "body dysmorphi*" or "post-traumatic stress disorder*" or "adjustment disorder*" or PTSD) OR AB ("mental disorder*" or "mental illness*" or "psychiatric disabilit*" or "psychiatric disorder*" or "psychiatric diagnosis*" or "serious emotional disturbance*" or "severe emotional disturbance*" or "mental health condition*" or "anxiety disorder*" or phobia* or "phobic disorder*" or |

## SCOPING REVIEW PROTOCOL

|    |                      |                                                                                                                                                                                                                                                                                                                                                                                                                                                                                                                                                                                                                                                                                                                                                                                                                                                                                                                                                               |
|----|----------------------|---------------------------------------------------------------------------------------------------------------------------------------------------------------------------------------------------------------------------------------------------------------------------------------------------------------------------------------------------------------------------------------------------------------------------------------------------------------------------------------------------------------------------------------------------------------------------------------------------------------------------------------------------------------------------------------------------------------------------------------------------------------------------------------------------------------------------------------------------------------------------------------------------------------------------------------------------------------|
|    |                      | “panic disorder*” or “obsessive-compulsive disorder*” or OCD or “bipolar disorder*” or “manic disorder*” or “manic depression” or “dissociative disorder*” or “multiple-personality disorder” or “eating disorder*” or anorexi* or bulimi* or “binge eating*” or “eating disorder not otherwise specified” or EDNOS or “other specified feeding or eating disorder” or OSFED or “disordered eating” or “mood disorder*” or “depressive disorder*” or “affective disorder*” or depression or “cyclothymic disorder*” or cyclothymia or “dysthymic disorder*” or dysthymia or “personality disorder*” or “schizophrenia spectrum disorder*” or schizophrenia or “psychotic disorder*” or psychosis or psychoses or “schizoaffective disorder*” or “psychotic affective disorder*” or “paranoid disorder*” or “somatoform disorder*” or “body dysmorphic disorder*” or “body dysmorphi*” or “post-traumatic stress disorder*” or “adjustment disorder*” or PTSD) |
| 5  | Concept (Resilience) | (MH “Hardiness”)                                                                                                                                                                                                                                                                                                                                                                                                                                                                                                                                                                                                                                                                                                                                                                                                                                                                                                                                              |
| 6  | Concept (Resilience) | TI (resilienc*) OR AB (resilienc*)                                                                                                                                                                                                                                                                                                                                                                                                                                                                                                                                                                                                                                                                                                                                                                                                                                                                                                                            |
| 7  |                      | 1 or 2                                                                                                                                                                                                                                                                                                                                                                                                                                                                                                                                                                                                                                                                                                                                                                                                                                                                                                                                                        |
| 8  |                      | 3 or 4                                                                                                                                                                                                                                                                                                                                                                                                                                                                                                                                                                                                                                                                                                                                                                                                                                                                                                                                                        |
| 9  |                      | 5 or 6                                                                                                                                                                                                                                                                                                                                                                                                                                                                                                                                                                                                                                                                                                                                                                                                                                                                                                                                                        |
| 10 |                      | 7 and 8 and 9                                                                                                                                                                                                                                                                                                                                                                                                                                                                                                                                                                                                                                                                                                                                                                                                                                                                                                                                                 |
| 11 |                      | limit 10 to (english language and humans and yr="2000 - Current")                                                                                                                                                                                                                                                                                                                                                                                                                                                                                                                                                                                                                                                                                                                                                                                                                                                                                             |

SCOPING REVIEW PROTOCOL

Scopus Database Search Strategy

| Search line # | PCC conceptual term of interest     | Search term entered into Scopus                                                                                                                                                                                                                                                                                                                                                                                                                                                                                                                                                                                                                                                                                                                                                                                                                                                                                                                                                                                                                                                                                                                                                                                                                                         |
|---------------|-------------------------------------|-------------------------------------------------------------------------------------------------------------------------------------------------------------------------------------------------------------------------------------------------------------------------------------------------------------------------------------------------------------------------------------------------------------------------------------------------------------------------------------------------------------------------------------------------------------------------------------------------------------------------------------------------------------------------------------------------------------------------------------------------------------------------------------------------------------------------------------------------------------------------------------------------------------------------------------------------------------------------------------------------------------------------------------------------------------------------------------------------------------------------------------------------------------------------------------------------------------------------------------------------------------------------|
| 1             | Population (Transition-age youth)   | TITLE-ABS-KEY (youth* or "transition age youth*" or teen* or adolescen* or "emerging adult*" or "young adult*" or "early adult*" or "young person*" or "young people*" or juvenile*)                                                                                                                                                                                                                                                                                                                                                                                                                                                                                                                                                                                                                                                                                                                                                                                                                                                                                                                                                                                                                                                                                    |
| 2             | Population (Serious mental illness) | TITLE-ABS-KEY ("mental disorder*" or "mental illness*" or "psychiatric disabilit*" or "psychiatric disorder*" or "psychiatric diagnosis*" or "serious emotional disturbance*" or "severe emotional disturbance*" or "mental health condition*" or "anxiety disorder*" or phobia* or "phobic disorder*" or "panic disorder*" or "obsessive-compulsive disorder*" or OCD or "bipolar disorder*" or "manic disorder*" or "manic depression" or "dissociative disorder*" or "multiple-personality disorder" or "eating disorder*" or anorexi* or bulimi* or "binge eating*" or "eating disorder not otherwise specified" or EDNOS or "other specified feeding or eating disorder" or OSFED or "disordered eating" or "mood disorder*" or "depressive disorder*" or "affective disorder*" or depression or "cyclothymic disorder*" or cyclothymia or "dysthymic disorder*" or dysthymia or "personality disorder*" or "schizophrenia spectrum disorder*" or schizophrenia or "psychotic disorder*" or psychosis or psychoses or "schizoaffective disorder*" or "psychotic affective disorder*" or "paranoid disorder*" or "somatoform disorder*" or "body dysmorphic disorder*" or "body dysmorphi*" or "post-traumatic stress disorder*" or "adjustment disorder*" or PTSD) |
| 3             | Concept (Resilience)                | TITLE-ABS-KEY (resilienc*)                                                                                                                                                                                                                                                                                                                                                                                                                                                                                                                                                                                                                                                                                                                                                                                                                                                                                                                                                                                                                                                                                                                                                                                                                                              |
| 4             |                                     | 1 and 2 and 3                                                                                                                                                                                                                                                                                                                                                                                                                                                                                                                                                                                                                                                                                                                                                                                                                                                                                                                                                                                                                                                                                                                                                                                                                                                           |
| 5             |                                     | limit 4 to (english language and yr="2000 - Current")                                                                                                                                                                                                                                                                                                                                                                                                                                                                                                                                                                                                                                                                                                                                                                                                                                                                                                                                                                                                                                                                                                                                                                                                                   |

# BMJ Open

## Understanding resilience among transition-age youth with serious mental illness: Protocol for a scoping review

|                                 |                                                                                                                                                                                                                                                                                                                                                                                                                                                                                                                                                                                                                                     |
|---------------------------------|-------------------------------------------------------------------------------------------------------------------------------------------------------------------------------------------------------------------------------------------------------------------------------------------------------------------------------------------------------------------------------------------------------------------------------------------------------------------------------------------------------------------------------------------------------------------------------------------------------------------------------------|
| Journal:                        | <i>BMJ Open</i>                                                                                                                                                                                                                                                                                                                                                                                                                                                                                                                                                                                                                     |
| Manuscript ID                   | bmjopen-2021-059826.R4                                                                                                                                                                                                                                                                                                                                                                                                                                                                                                                                                                                                              |
| Article Type:                   | Protocol                                                                                                                                                                                                                                                                                                                                                                                                                                                                                                                                                                                                                            |
| Date Submitted by the Author:   | 19-Aug-2022                                                                                                                                                                                                                                                                                                                                                                                                                                                                                                                                                                                                                         |
| Complete List of Authors:       | Nesbitt, Amy; University of Toronto, Rehabilitation Sciences Institute Sabiston, Catherine; University of Toronto, Faculty of Kinesiology and Physical Education<br>deJonge, Melissa; University of Toronto, Faculty of Kinesiology and Physical Education<br>Barbic, Skye; The University of British Columbia, Occupational Science and Occupational Therapy; Foundry<br>Kozloff, Nicole; Centre for Addiction and Mental Health; University of Toronto, Department of Psychiatry<br>Nalder, Emily; University of Toronto, Occupational Science and Occupational Therapy; University of Toronto, Rehabilitation Sciences Institute |
| <b>Primary Subject Heading</b>: | Mental health                                                                                                                                                                                                                                                                                                                                                                                                                                                                                                                                                                                                                       |
| Secondary Subject Heading:      | Health services research                                                                                                                                                                                                                                                                                                                                                                                                                                                                                                                                                                                                            |
| Keywords:                       | MENTAL HEALTH, PSYCHIATRY, PUBLIC HEALTH                                                                                                                                                                                                                                                                                                                                                                                                                                                                                                                                                                                            |
|                                 |                                                                                                                                                                                                                                                                                                                                                                                                                                                                                                                                                                                                                                     |

SCHOLARONE™  
Manuscripts

## SCOPING REVIEW PROTOCOL

1  
2  
3 1 **Understanding resilience among transition-age youth with serious mental illness: Protocol**  
4  
5  
6 2 **for a scoping review**

7  
8 3 Amy E. Nesbitt, MSc (amy.nesbitt@mail.utoronto.ca)<sup>a\*</sup>

9  
10 4 Catherine M. Sabiston, PhD (catherine.sabiston@utoronto.ca)<sup>b</sup>

11  
12 5 Melissa L. deJonge, MSc (melissa.dejonge@utoronto.ca)<sup>b</sup>

13  
14 6 Skye Barbic, PhD (skye.barbic@ubc.ca)<sup>c,d</sup>

15  
16 7 Nicole Kozloff, MD, SM (nicole.kozloff@camh.ca)<sup>e</sup>

17  
18 8 Emily Nalder, PhD (emily.nalder@utoronto.ca)<sup>a,f</sup>

19  
20  
21  
22 9 <sup>a</sup> Rehabilitation Sciences Institute, University of Toronto (500 University Avenue, Toronto, ON,  
23 Canada, M5G 1V7)

24  
25 11 <sup>b</sup> Faculty of Kinesiology and Physical Education, University of Toronto (55 Harbord Street,  
26 Toronto, ON, Canada, M5S 2W6)

27  
28 13 <sup>c</sup> Department of Occupational Science and Occupational Therapy, University of British  
29 Columbia (T325 - 2211 Wesbrook Mall, Vancouver, BC, Canada, V6T 2B5)

30  
31 15 <sup>d</sup> Foundry (Vancouver, BC, Canada)

32  
33 16 <sup>e</sup> Centre for Addiction and Mental Health (250 College Street, Toronto, ON, Canada, M5T 1R8)

34  
35 17 <sup>f</sup> Department of Occupational Science and Occupational Therapy, University of Toronto (500  
36 University Avenue, Toronto, ON, Canada, M5G 1V7)

37  
38 19 \*Corresponding author: Amy E. Nesbitt, MSc, OT Reg. (Ont.). Rehabilitation Sciences Institute,  
39 University of Toronto, 500 University Avenue, Toronto, ON, Canada, M5G 1V7. Phone: 416-  
40 978-5837. Fax: 416-971-2118. Email: amy.nesbitt@mail.utoronto.ca  
41  
42  
43

44 23 **Keywords:** adolescent, young adult, resilience, mental health, review

45  
46 24 **Word Count:** 4838

47  
48  
49 25

50  
51 26

52  
53 27

## SCOPING REVIEW PROTOCOL

1        **Understanding resilience among transition-age youth with serious mental illness: Protocol**  
2  
3  
4  
5        **for a scoping review**  
6

7  
8        **Abstract**  
9

10    **Introduction:** Transition-age youth (16-29 years old) are disproportionately affected by the  
11    onset, impact and burden of serious mental illness (SMI; e.g., depression, bipolar disorder,  
12    schizophrenia spectrum disorders). Emerging evidence has increasingly highlighted the concept  
13    of resilience in mental health promotion and treatment approaches for this population. A  
14    comprehensive synthesis of existing evidence is needed to enhance conceptual clarity in this  
15    area, identify knowledge gaps, and inform future research and practice. As such, the present  
16    scoping review is guided by the following questions: How has resilience been conceptualized  
17    and operationalized in the transition-age youth mental health literature? What factors influence  
18    resilience among transition-age youth with SMI, and what outcomes have been studied within  
19    the context of transition-age youth's mental health recovery?  
20  
21    **Methods and analysis:** The present protocol will follow six key stages, in accordance with  
22    Arksey and O'Malley's (2005) established scoping review methodology and recent iterations of  
23    this framework, and has been registered with Open Science Framework (<https://osf.io/rzfc5>). The  
24    protocol and review process will be carried out by a multidisciplinary team in consultation with  
25    community stakeholders. A comprehensive search strategy will be conducted across multiple  
26    electronic databases to identify relevant empirical literature. Included sources will address the  
27    population of transition-age youth (16-29 years) diagnosed with SMI, the concept of resilience  
28    (in any context), and will report original research written in English. Data screening and  
29    extraction will be completed by at least two independent reviewers. Following meta-narrative  
30  
31  
32  
33  
34  
35  
36  
37  
38  
39  
40  
41  
42  
43  
44  
45  
46  
47  
48  
49  
50  
51  
52  
53  
54  
55  
56  
57  
58  
59  
60

## SCOPING REVIEW PROTOCOL

1 review and qualitative content analyses, findings will be synthesized as a descriptive overview  
2  
3  
4  
5  
6 with tabular and graphical summaries.

7  
8 **Ethics and dissemination:** University of Toronto Health Sciences Research Ethics Board  
9  
10 approval was obtained to complete the community stakeholder consultation stage of this review.  
11  
12 Results will be disseminated through conference presentations, publications, and user-friendly  
13  
14 reports and graphics.  
15  
16

### 8 **Strengths and limitations of this study**

- 9 • This scoping review study will follow recent recommendations and guidance documents  
10 to promote methodological rigor and has been registered to enhance transparency.
- 11 • Variability in how the population (transition-age youth) and concept (resilience) have  
12 been defined, as well as restrictions to the search strategy based on language, date, and  
13 publication type may limit the breadth of the search.
- 14 • An assessment of the methodological quality of included studies will not be conducted  
15 which limits the types of conclusions and implications that can be drawn from the review.
- 16 • We will apply an iterative and team-based approach, in consultation with community  
17 stakeholders (transition-age youth with SMI, clinicians, researchers) to improve the  
18 applicability and dissemination of results.

## SCOPING REVIEW PROTOCOL

**Introduction**

Transition-age youth (16-29 years old) are the highest risk age group for onset of serious mental illness (SMI; mental illnesses that cause substantial functional impairment, e.g., depression, bipolar disorder, schizophrenia spectrum disorders), the single most disabling group of disorders worldwide (1,2). The experience of mental illness for young people is unique, in that it arises during a critical period of psychosocial development, identity formation, and many complex life transitions (3,4). Access to supportive treatment and relationships, social marginalization, and stigma continue to influence the course and severity of mental illness for transition-age youth (5). Indeed, SMI can negatively impact one's overall physical health, quality of life, and engagement in meaningful life roles and activities, including academics, employment, and social relationships (1,4,6,7). Further, the experience of chronic and persistent symptoms of mental illness can contribute to suicide risk, which is the second leading cause of death among individuals 15-29 years old globally (8,9). Despite the increased risk and burden of SMI among transition-age youth, this age group faces many barriers in accessing service and supports, as they transition out of youth services and into the adult mental health and addiction services sector (10,11). As such, the identification of factors that contribute to transition-age youth's mental health recovery and early intervention are now recognized as priority areas within national and global mental health strategies and guidelines (11–14).

Of particular interest, researchers and clinicians have emphasized the importance of promoting *resilience* in transition-age youth's mental health recovery. Most definitions of resilience refer to positive adaptation in the face of significant adversity as a central or defining feature. However, there are many different ways of conceptualizing resilience (e.g., as a trait, outcome, or dynamic process) (15,16), which has led to some ambiguity in how resilience is



## SCOPING REVIEW PROTOCOL

1 defined and understood across different research disciplines and perspectives (17,18). For  
2  
3  
4  
5  
6  
7  
8  
9  
10  
11  
12  
13  
14  
15  
16  
17  
18  
19  
20  
21  
22  
23  
24  
25  
26  
27  
28  
29  
30  
31  
32  
33  
34  
35  
36  
37  
38  
39  
40  
41  
42  
43  
44  
45  
46  
47  
48  
49  
50  
51  
52  
53  
54  
55  
56  
57  
58  
59  
60

1 defined and understood across different research disciplines and perspectives (17,18). For  
2 example, many authors have conceptualized and discussed resilience as an outcome resulting  
3 from changes made at the individual level, or in relation to positive personal attributes (e.g.,  
4 hope, self-efficacy, coping) (19,20). This aligns with early definitions of resilience as an  
5 exceptional personal quality or trait, that an individual either has or does not have, which will  
6 determine their capacity to both endure incredibly stressful life events and continue on a path  
7 towards full functional and emotional recovery (15,21,22). Conceptualizations of resilience as a  
8 personal trait or outcome have been criticized in recent research as this does not recognize the  
9 critical role of one's environment and available resources (17,23).

10 In more contemporary and holistic conceptions, "resilience has come to be seen less in  
11 terms of static characteristics within the individual and more as a dynamic and multi-faceted  
12 family of processes that evolve over time" (p. 234) (24). To illustrate, resilience has been  
13 conceptualized as a dynamic process, involving one's personal characteristics, environment, and  
14 support networks, that influence how an individual "bounces back" from challenging  
15 circumstances (e.g., onset of mental illness) (16–18,25). This also acknowledges the integral role  
16 of not only the individual, but the social and ecological systems that influence resilience (26,27).  
17 For example, Wathen and colleagues (2012) offer the following definition further contextualized  
18 to the field of trauma and mental health: "Resilience is a dynamic process in which  
19 psychological, social, environmental and biological factors interact to enable an individual at any  
20 stage of life to develop, maintain, or regain their mental health despite exposure to adversity" (p.  
21 10) (28). Through this lens, resilience is seen as fluid (rather than a fixed or pre-determined  
22 trait), arising through multiple pathways that lead to positive indices of flourishing and  
23 functioning (29). Taken together, processes of resilience are shaped by the complex interplay

## SCOPING REVIEW PROTOCOL

1 between individual experiences of stress / adversity, multimodal “*resilience factors*” (e.g., risks,  
2 internal and external protective factors, self-regulatory strategies), as well as one’s adaptation  
3 and other resilience-related outcomes (25,30).

4 This process-oriented perspective of resilience has gained increased attention in mental  
5 health and rehabilitation sciences research over the past two decades (19,29), and has aligned  
6 with the paradigm shift towards recovery models of mental health and the growing popularity  
7 and application of positive psychology principles in psychiatry (31). Indeed, resilience research  
8 and recovery models of mental health share an orientation towards understanding the processes  
9 that underly individual experiences (embedded within one’s sociocultural context / environment)  
10 and emphasize the importance of hope, meaning, engagement, and life satisfaction in one’s  
11 recovery (32–34). Recent conceptual models (35) and interventions (36,37) focused on youth-  
12 specific and integrated mental health services also highlight resilience as an important aspect to  
13 the recovery process. Additionally, adopting a resilience perspective aligns with more strengths-  
14 based and transdiagnostic approaches which aim to better understand processes of recovery  
15 relevant to a broader range of adolescent and young adult mental health service users (38).  
16 Researchers have begun to uncover resilience factors across and beyond specific diagnoses,  
17 which can be targeted in interventions to promote positive development, functioning, and well-  
18 being (26,29,30,39). As such, the study of resilience among transition-age youth with SMI can  
19 inform developments in recovery-oriented approaches to service delivery and warrants further  
20 exploration.

21 In sum, emerging evidence and frameworks of resilience provide a unique lens to  
22 understanding mental health among transition-age youth, with the capacity to recognize  
23 individuals’ strengths, and move beyond the common focus on illness, deficits and problems in

## SCOPING REVIEW PROTOCOL

1 rehabilitation sciences (35). However, researchers have not yet developed a theoretical  
2 framework or model of resilience tailored to the unique experiences of transition-age youth who  
3 are diagnosed with SMI to guide research and practice (19). In addition, conceptualizations of  
4 resilience vary across the scientific literature, which directly impacts how the concept of  
5 resilience is understood, operationalized and applied within this context. This is important to  
6 address as discrepancies across definitions of resilience may limit measurement, study  
7 comparisons, and current understandings of resiliency-informed care approaches in research and  
8 clinical practice (23). A comprehensive synthesis of existing evidence will enhance conceptual  
9 clarity in this area, identify factors and outcomes that are relevant to transition-age youth's  
10 resilience, and inform future work.

### **Objectives**

12 The overarching purpose of the present scoping review is to synthesize and describe the  
13 breadth of scientific literature on resilience among transition-age youth diagnosed with SMI,  
14 identify current knowledge gaps, and recommend key areas for future resilience research among  
15 this population. Specifically, this scoping review will explore how the concept of resilience has  
16 been conceptualized and operationalized in the transition-age youth mental health literature, and  
17 identify resilience factors and outcomes that have been studied within the context of transition-  
18 age youth's mental health recovery (e.g., adversity, risks, internal and external protective factors,  
19 self-regulatory strategies, adaptation and resilience-related outcomes). The focus of this review  
20 will be on conceptualizations of resilience from a process-oriented perspective (rather than as a  
21 personal trait or outcome).

### **Methods and Analysis**

## SCOPING REVIEW PROTOCOL

1 A scoping review design was selected based on the exploratory nature of the proposed  
2 research question and the current focus on clarifying the concept of resilience. Particularly, a  
3 scoping review design allows for a comprehensive summary of knowledge, inclusive of more  
4 broad study objectives and methodologies, and is thus recommended for gaining conceptual  
5 clarity and identifying key knowledge gaps (40,41).

6 The scoping review protocol will follow the methodological stages outlined by Arksey  
7 and O'Malley (2005), and extended by Levac and colleagues (2010), including: i) identifying the  
8 research question, ii) identifying relevant studies, iii) study selection, iv) charting the data, v)  
9 collating, summarizing, and reporting the results, and vi) stakeholder consultation (42,43).

10 Throughout the review process, an iterative and reflexive approach will be used in order to refine  
11 the initial protocol as needed in consultation with a community stakeholder group (involving  
12 researchers, clinicians, and transition-age youth with SMI) (42,43). Recent guidance documents  
13 (44) and best practices for conducting and reporting scoping reviews (PRISMA-ScR) (45) will  
14 also be applied to promote methodological rigor and transparency. The PRISMA-P checklist (46)  
15 can be found in Appendix A (online supplementary). The current protocol has been registered  
16 through Open Science Framework (<https://osf.io/rzfc5>), and will be conducted over a one-year  
17 timeframe (December 2021 to November 2022).

### 18 **Stage 1: Identifying the Research Question**

19 This scoping review aims to explore the extent and breadth of the current scientific  
20 literature on resilience among transition-age youth diagnosed with SMI. Specifically, the review  
21 will address two research questions: (1) How has resilience been conceptualized and  
22 operationalized (i.e., defined and measured) in the transition-age youth mental health literature?  
23 (2) What factors influence resilience among transition-age youth with SMI, and what outcomes

## SCOPING REVIEW PROTOCOL

1 have been studied within the context of transition-age youth's mental health recovery? The  
2 research questions have been broadly framed using the PCC mnemonic to address the *population*  
3 of transition-age youth diagnosed with SMI and the *concept* of resilience within any *context* of  
4 one's mental health recovery (41). Each component is further clarified below, in accordance with  
5 the Joanna Briggs Institute scoping review manual (44).

6 **Population.** For the present review, the population is defined as "transition-age youth",  
7 including adolescents and young adults between the ages of 16 and 29 years old, who are  
8 entering adulthood and have been diagnosed with SMI. It is important to note that definitions of  
9 "youth", "adolescents", and "young adults" differ across various cultures and settings, and are  
10 thus highly mixed within the scholarly literature. In order to be inclusive of the most common  
11 European/United Nations/WHO definitions of this age group and reflective of current mental  
12 health service models, the present review will include studies with participants spanning middle  
13 adolescence (age 15) to the "upper limit" of young adulthood (age 36) if the target population is  
14 clearly defined as "transition-age youth" (3,14,47–50). Additionally, serious mental illness  
15 (SMI) is defined as "a mental, behavioral, or emotional disorder resulting in serious functional  
16 impairment, which substantially interferes with or limits one or more major life activities", such  
17 as one's interpersonal relationships, self-care, employment, or recreation (51,52). Definitions of  
18 SMI exclude dementias, developmental disorders, and substance use disorders, as well as mental  
19 disorders due to a general medical condition (52). Examples of mental health conditions that may  
20 meet criteria for SMI include: major depressive disorders, bipolar disorders, borderline  
21 personality disorder, anxiety disorders, eating disorders and schizophrenia spectrum disorders  
22 (51,52). Among youth and adolescents (under age 18) the same definition and examples are  
23 applied but also occasionally termed "serious emotional disturbance" (SED), rather than SMI

## SCOPING REVIEW PROTOCOL

(52,53). Studies with participants experiencing co-morbid disorders which are not the primary focus will also be included in this scoping review.

**Concept.** While definitions of resilience vary across different research disciplines, most definitions refer to positive adaptation in the face of significant challenge, risk or adversity as central or defining features, and acknowledge the importance of sociocultural factors in shaping experiences and understandings of resilience (19). For the purpose of this scoping review, resilience is defined as a dynamic process that unfolds over time, involving multiple resilience factors that interact to enable individuals to negotiate or recover from stressful life events / adversity (e.g., one's personal characteristics, environment and support networks). Studies that adopt this process-oriented perspective will be included, and the following core elements of resilience and resilience factors will be explored: adversity, risks, internal and external protective factors, self-regulatory strategies, adaptation and resilience-related outcomes (25,30). Studies that focus solely on a trait perspective of resilience, similar constructs (e.g., ego-resilience, psychological capital) or biological / genetic / neurophysiological factors will be omitted. Lastly, given our focus on psychological resilience at the person- or individual-level, studies evaluating family- or community-level resilience will not be included.

**Context.** While "clinical recovery" is often defined as a reduction in SMI symptoms or impairment (typically in clinical / health care settings), "personal recovery" refers to the processes that contribute to transition-age youth's hope, development, and engagement in meaningful activities (even while facing SMI) and emphasizes the importance of multiple contexts where this occurs (e.g., spanning personal, familial, social and institutional environments) (35). The present review considers mental health recovery primarily through a personal recovery lens, and will thus explore transition-age youth's resilience in any context of

## SCOPING REVIEW PROTOCOL

1 their mental health recovery, which may include individual, community, and health-oriented  
2 settings (among others).

### 3 **Stage 2: Identifying Relevant Literature**

4 **Information source.** To comprehensively review the existing evidence and knowledge  
5 base related to resilience in the field of transition-age youth mental health, empirical sources will  
6 be considered, including original research / primary studies. Specifically, six electronic databases  
7 of value to the fields of psychology, health and rehabilitation sciences will be searched to  
8 identify relevant empirical studies: MEDLINE (Ovid), EMBASE (Ovid), PsycINFO, AMED,  
9 CINAHL, and Scopus. To enhance the comprehensiveness of the search, relevant journals and  
10 the reference list of included sources and similar reviews will be manually searched.

11 **Search strategy.** The search terms and search strategy will be developed by the  
12 multidisciplinary review team, in consultation with a health sciences librarian at the University  
13 of Toronto. Importantly, keywords have been carefully selected to best capture the complex and  
14 evolving terminology used to describe the population and concept reflected in our research  
15 question. As mentioned, terms to describe the age group of transition-age youth are highly  
16 variable and inconsistent within the literature (e.g., subject headings / keywords may be inclusive  
17 of youth / teenagers / adolescents / emerging adults / adults etc.). Clinical and lay language to  
18 describe SMI diagnoses have also evolved over time, with “severe and persistent mental illness”  
19 and “chronic mental illness” often cited (52). Further, as reflected in the research aims, there is  
20 currently no consensus on the definition of resilience and conceptualizations differ based on the  
21 context or academic discipline applied (19). To overcome these challenges in the development  
22 and execution of our search, we will utilize the following techniques: i) a multi-step search  
23 process to ensure relevant sources are not missed (an initial limited search strategy favoring

## SCOPING REVIEW PROTOCOL

1 sensitivity over precision will be conducted first and inform potential revisions making the  
2 search strategy more precise); ii) use of Yale MeSH analyzer for piloting; and iii) ongoing expert  
3 consultation. Additionally, the search strategy will undergo peer review to enhance its feasibility  
4 and rigor (e.g., CADTH Peer Review Checklist for Search Strategies) (54).

5 The preliminary search strategy and list of keywords have been developed using  
6 MEDLINE (Ovid) and adapted to each database (see Appendix B online supplementary). The  
7 search strategy will explore specified search terms within subject headings, titles, abstracts and  
8 keywords. Search terms will be combined using appropriate Boolean logic and operators (e.g.,  
9 ‘and’, ‘or’, ‘not’).

### 10 **Stage 3: Study Selection**

11 Study selection will follow a collaborative and iterative screening process among the  
12 review team using Covidence systematic review software (55) and pre-determined eligibility  
13 criteria (42,43). All search results will be exported to Covidence for data management and to  
14 remove duplicates. At least two independent reviewers (authors AN and MD) will complete  
15 screening in two stages for i) title/abstract and ii) full-text review. The reviewers will complete a  
16 calibration exercise using a sample of 10 references to pilot inclusion / exclusion criteria and  
17 compare decisions (e.g., include / exclude / uncertain). Formal title/abstract screening will  
18 commence when 80% agreement is achieved and will involve regular meetings among reviewers  
19 to discuss any challenges or uncertainties. Upon completion of stage 1, full-text references will  
20 be obtained and independently screened by the same two reviewers. The same strategy will be  
21 applied to stage 2 full-text screening, including piloting (calibration exercise for 10 references)  
22 and regular discussion. At each stage, reviewer (inter-rater) agreement will be reported.



## SCOPING REVIEW PROTOCOL

1 Disagreements will be resolved by consensus or by the decision of a third reviewer (senior  
2 authors EN and CS).

3 Included sources will address the population of transition-age youth diagnosed with SMI,  
4 the concept of resilience (in any context), and will contain original peer reviewed research  
5 written in English. Specific language restrictions were made for feasibility purposes.  
6 Additionally, the publishing date was limited to the years 2000 to 2022 as this is the time period  
7 where a significant rise in resilience research emerged within mental health and rehabilitation  
8 sciences (19,29,56). The prioritisation, implementation and evaluation of mental health services  
9 specifically tailored to transition-age youth (e.g., early intervention programs) also mainly took  
10 root after the year 2000 (13,47,57). Further inclusion / exclusion criteria for the two-stage  
11 screening are detailed below.

**Eligibility for Stage 1 Title/Abstract Review:**

12 **Inclusion criteria.** a) Population: Refers to transition-age youth diagnosed or living with  
13 SMI (as defined previously). b) Concept: Resilience / resiliency is identified as a key focus  
14 within the purpose / objectives / research question, outcome measure, and/or findings. c)  
15 Context: Is set in any individual, community or health-oriented context of mental health  
16 recovery. d) Type of source: Peer reviewed original research (quantitative, qualitative, mixed  
17 method). e) Publication language / date: Written in English and published between 2000 and  
18 2022.

19 **Exclusion criteria.** a) Population: Refers to non-clinical population, general population,  
20 children / youth (age 0-14), or childhood developmental disorder. b) Concept: Resilience /  
21 resiliency is not an explicit focus. c) Type of source: Peer reviewed articles with the primary aim  
22 of developing, reporting or validating the psychometric properties of survey measures /  
23

## SCOPING REVIEW PROTOCOL

1 instruments, study protocols, review articles (e.g., systematic/scoping reviews, meta-analyses),  
2  
3 books / book chapters, and grey literature (e.g., editorials, commentaries / reports, clinical  
4  
5 guidelines, conference proceedings, and theses / dissertations). d) Publication language / date:  
6  
7  
8 Written in another language than English and published before January 1, 2000.  
9  
10

### 5 *Eligibility for Stage 2 Full-text Review:*

11  
12  
13  
14  
15 *Inclusion criteria.* a) Population: Clearly defined clinical population in accordance with  
16  
17 either: participant self-reported history of SMI; clinician confirmed diagnosis of SMI; or DSM-V  
18  
19 / ICD-10 system diagnostic criteria. b) Concept: Must explicitly define / operationalize the  
20  
21 concept of resilience from a process-oriented perspective and focus on individual-level  
22  
23 resilience.  
24  
25

26  
27  
28  
29  
30  
31  
32  
33  
34  
35  
36  
37  
38  
39  
40  
41  
42  
43  
44  
45  
46  
47  
48  
49  
50  
51  
52  
53  
54  
55  
56  
57  
58  
59  
60  
*Exclusion criteria.* a) Population: Mixed samples whereby transition-age youth with SMI  
are encompassed within broader age groups or the general population (without the stratification  
of results / reporting). b) Concept: Trait resilience, other psychological constructs that are similar  
or connected to resilience / resiliency (e.g., psychological capital, hardiness, grit, general indices  
of subjective well-being), family- or community-level resilience, or biological / genetic /  
neurophysiological factors are identified as the sole / primary focus or outcome.

While criteria were developed to maintain a broad scope of selected studies, our hope is  
that stringent inclusion / exclusion criteria will eliminate sources that only include the concept of  
resilience as an opinion, recommendation, vague interpretation, or buzzword – as this will not  
aid in enhancing conceptual clarity in this research area. As such, these broad eligibility criteria  
may undergo further refinement to ensure that selected sources capture the full breadth of  
knowledge available related to resilience among young people with SMI.

### 23 **Stage 4: Data Extraction**

## SCOPING REVIEW PROTOCOL

1  
2  
3 1 Following recommended data charting methods (42,43), a standardized and systematic  
4  
5 2 charting form (Table 1) will be used to organize and interpret relevant details from the selected  
6  
7 3 sources in line with our research question and objectives. The following information will be  
8  
9 4 charted in Excel: i) general document details, ii) key characteristics of empirical studies (e.g.,  
10  
11 5 research design, methods, intervention details, youth engagement, intersectional approaches,  
12  
13 6 study population, context), iii) how resilience was conceptualized and operationalized (e.g.,  
14  
15 7 definition, theoretical framework / model, academic discipline, measures), and iv) resilience  
16  
17 8 factors and outcomes identified.  
18  
19  
20

21 9 The preliminary chart form was also developed in accordance with Greenhalgh and  
22  
23 10 colleagues' (2005) meta-narrative approach (58). Specifically, this meta-narrative approach was  
24  
25 11 originally created to detail how a field of study or key concept has evolved over time and to  
26  
27 12 explore potential tensions that exist across research traditions (or "paradigms") within  
28  
29 13 knowledge syntheses (58). A meta-narrative approach is recommended when examining  
30  
31 14 complex, heterogeneous bodies of literature where a key concept of interest has been  
32  
33 15 conceptualized and investigated through different research traditions, and conceptual clarity is  
34  
35 16 needed (58). According to Greenhalgh et al. (2005), a *research tradition* refers to a paradigm of  
36  
37 17 inquiry, undertaken by researchers, that shares four key interrelated dimensions (conceptual,  
38  
39 18 theoretical, methodological, instrumental), and thus shows distinct disciplinary roots, scope and  
40  
41 19 key concepts (58). Research traditions are often characterized and influenced by seminal  
42  
43 20 conceptual papers that inform the direction and focus of future work (58). Alternatively, an  
44  
45 21 *academic discipline* is defined as a broader field of study or branch of knowledge (e.g.,  
46  
47 22 sociology, psychology, medicine) (58).  
48  
49  
50  
51  
52  
53  
54  
55  
56  
57  
58  
59  
60

## SCOPING REVIEW PROTOCOL

1 Data extraction will be a collaborative and iterative process among the review team to  
 2 ensure that key characteristics, definitions, themes and strengths/limitations are captured. A  
 3 calibration exercise using a sample of 5 studies will be completed by two reviewers to pilot the  
 4 chart form. When agreement of at least 80% is achieved, the two independent reviewers (authors  
 5 AN and MD) will complete the remaining formal data charting procedures for all references. The  
 6 charting form will be revised as needed based on stakeholder feedback. Consensus will be  
 7 reached through discussion or final decision by a third reviewer (senior authors EN and CS) if  
 8 necessary. Any challenges in the organization / categorization of data at this stage will be  
 9 brought to the four content experts on this protocol (CS, SB, NK, EN), each of whom have over  
 10 10 years of research and/or clinical experience in young adult mental health and resiliency.

11 *Table 1. Draft charting form*

|                                                        |                                                                                                                                                                                                 |
|--------------------------------------------------------|-------------------------------------------------------------------------------------------------------------------------------------------------------------------------------------------------|
| General document details                               |                                                                                                                                                                                                 |
| APA citation                                           | Full author, date and journal details.                                                                                                                                                          |
| Country and location                                   | Country of publication (and location if provided).                                                                                                                                              |
| Study characteristics                                  |                                                                                                                                                                                                 |
| Study purpose                                          | Purpose, research question(s), aim(s), and/or objective(s) of the study.                                                                                                                        |
| Study population and sample size                       | Age range, SMI (clinical diagnosis / self-reported; stage of illness), relevant demographic characteristics. Number of participants.                                                            |
| Study design and methods                               | Quantitative, qualitative, or mixed methods. Main experimental, observational or qualitative methods used.                                                                                      |
|                                                        | Intervention (if applicable): Description of key characteristics (e.g., intervention purpose / target, type, main components, duration)                                                         |
|                                                        | Youth engagement (if applicable): Extent to which youth with SMI were engaged through aspects of the research process.                                                                          |
|                                                        | Intersectional approaches (if applicable): Description of recruitment procedures, theoretical frameworks, and analyses addressing diversity and intersecting social identities of participants. |
| Context                                                | The setting of the research if provided (e.g., community, health-oriented, specific treatment / program).                                                                                       |
| Conceptualization and operationalization of resilience |                                                                                                                                                                                                 |

## SCOPING REVIEW PROTOCOL

|                                        |                                                                                                                                           |
|----------------------------------------|-------------------------------------------------------------------------------------------------------------------------------------------|
| Conceptualization                      | How was resilience described from a process-oriented perspective?                                                                         |
| Definition of resilience               | Definition or operationalization of resilience.                                                                                           |
| Theoretical framework/model            | Theory, conceptual model(s) or framework(s) applied.                                                                                      |
| Seminal papers referenced              | Overarching paradigm and seminal conceptual papers that have informed the research (if applicable).                                       |
| Instruments used to measure resilience | Specific measures / surveys employed (if applicable).                                                                                     |
| Academic discipline                    | Broad field of research or practice.                                                                                                      |
| Resilience factors and outcomes        |                                                                                                                                           |
| Adversity / risks                      | Personal or environmental risk factors identified (if applicable).                                                                        |
| Internal / external protective factors | Personal or environmental protective factors identified (if applicable).                                                                  |
| Self-regulatory strategies             | Strategies identified to self-manage mood, emotions, thoughts, and/or behaviors (if applicable).                                          |
| Study outcomes                         | Any outcomes that were measured or described. Description of positive change, resilience-related outcomes, or adaptation (if applicable). |
| Important results                      | Description of main findings and implications.                                                                                            |

**Stage 5: Collating, Summarizing, and Reporting the Results**

The PRISMA-ScR Checklist will guide the presentation of results in the final report (45). This will include a flow diagram to explicitly detail review decision making processes (45). Data from eligible full-texts will be analyzed and collated using meta-narrative and qualitative content analyses as well as descriptive statistics (e.g., frequencies / counts). Results of this scoping review will be summarized narratively in a descriptive overview (42,43).

Qualitative content analysis will be used to identify, analyze, and report patterns across the included empirical sources to understand how resilience has been conceptualized and operationalized among transition-age youth with SMI. Particularly, definitions, measures, resilience factors and outcomes will be open-coded, and then grouped to generate distinct categories. Aspects of the study population and context of mental health recovery may also be analyzed. The inductive and reflexive coding process will be completed by two reviewers

## SCOPING REVIEW PROTOCOL

1 (authors AN and MD) using Nvivo software. Categories will then be reviewed and discussed  
2 with all members of the multidisciplinary review team (CS, SB, NK, EN) for further refinement.  
3 As guided by Greenhalgh et al. (2005) for meta-narrative review, findings will be organized and  
4 synthesized to map conceptualizations of resilience over time and across different research  
5 traditions (58). Research traditions will be identified through a process of grouping articles that  
6 reflect similar theoretical, methodological and/or instrumental approaches (e.g., seminal papers  
7 cited, how the authors frame the concept of resilience within the study outcomes or  
8 implications). This will allow for easier interpretation of the extent and breadth of the current  
9 literature on resilience among transition-age youth diagnosed with SMI. Particularly,  
10 comparisons and tensions across definitions of resilience may be highlighted according to each  
11 paradigm.

12 Reflexivity will support methodological rigor and transparency by explicitly  
13 acknowledging how the researchers' positionality may influence the motivations and  
14 methodological choices that ultimately shape the review process, interpretations, and results (59–  
15 61). Ongoing reflexive practice will be used to address and challenge researcher biases,  
16 assumptions, and preunderstandings that may influence study decisions and analyses, and to  
17 critically analyze positions of privilege and power in research activities. Detailed notes of our  
18 decision-making processes and justifications will be documented throughout all stages of the  
19 scoping review.

20 For the purpose of the present scoping review, we will use a combination of narrative,  
21 tabular, and graphical summaries to present key findings (42,43). A traditional summary chart  
22 will describe key characteristics of each included source (e.g., author and year of publication,  
23 research tradition, academic discipline, study design, study population, definitions of resilience,

## SCOPING REVIEW PROTOCOL

1 measures, main findings). Resilience factors and outcomes will be summarized in a table or  
2  
3 figure. A creative graphical / visual depiction of identified research traditions and timeframe will  
4  
5 also be used to “map” key findings of the review (58). In sum, the analytic approach has been  
6  
7 developed to facilitate conceptual / theoretical advancements in resilience research, identify key  
8  
9 knowledge gaps, and highlight potential future directions in the study of transition-age youth  
10  
11 resilience and mental health. The presentation and reporting of results (through summaries,  
12  
13 tables, and visuals) will be discussed among the multidisciplinary review team and community  
14  
15 stakeholder group. Consistent input from the perspective of researchers, clinicians, and  
16  
17 transition-age youth with SMI will enhance the relevance and utility of the review findings.  
18  
19  
20  
21  
22  
23

### 10 **Stage 6: Stakeholder Consultation**

11       The overarching goal of the current scoping review is to systematically explore the  
12  
13 current extent and breadth of peer reviewed research on resilience among transition-age youth  
14  
15 diagnosed with SMI. Particularly, efforts have been made within the scoping review  
16  
17 methodology to provide a holistic and coherent overview of evidence that can inform future  
18  
19 research, education, and practice (41–43). In order to achieve these goals, the multidisciplinary  
20  
21 review team has been formed to include knowledgeable stakeholders (researchers, clinicians,  
22  
23 knowledge users) with backgrounds in psychiatry / early intervention services (NK),  
24  
25 occupational therapy / resiliency in rehabilitation sciences (AN, SB, EN), and kinesiology /  
26  
27 young adult mental health programming (MD, CS).

28       Following Levac and colleagues’ (2010) recommendations, this scoping review will also  
29  
30 consult with community stakeholders to gain the perspectives of transition-age youth with lived  
31  
32 experience of SMI, clinicians, and other mental health / resiliency researchers (43). To achieve  
33  
34 Stage 6 of this review, qualitative focus groups will be conducted virtually (using online  
35  
36  
37  
38  
39  
40  
41  
42  
43  
44  
45  
46  
47  
48  
49  
50  
51  
52  
53  
54  
55  
56  
57  
58  
59  
60

## SCOPING REVIEW PROTOCOL

teleconferencing). Community stakeholders will be invited through the review team's current research / practice networks and established partnerships with youth-focused mental health services in Canada. Recruitment materials (emails, e-posters) will share details regarding eligibility, focus group participation, and the letter of informed consent form. Interested participants will provide written informed consent by digitally signing a secure online consent form on the University of Toronto's Research Electronic Data Capture (REDCap) platform.

Consultative meetings will be held at two time points to inform: i) the research methods (Topic Consultation and Input Meeting), and ii) interpretation, reporting and knowledge translation strategies (Reaction Meeting). Following current recommendations for stakeholder consultation (43,62,63) and focus group studies (64,65), up to 3 focus groups (n = 6-10 participants each) will be conducted at each time point. For the Topic Consultation and Input Meeting, community stakeholders will be asked about their perspectives of the review objectives and methods, key areas of focus for data extraction and analysis (e.g., important aspects of transition-age youth resilience to capture within the charting form), and what they would most like to learn from the results of the scoping review. At the time of the Reaction Meeting, community stakeholders will be asked about their impression of key review findings (e.g., how resilience has been defined), whether this resonates with them/their experiences, where gaps/tensions exist that require further investigation, and how this knowledge can be applied to support mental health recovery. This will shape how results are presented and interpreted in the final scoping review paper and guide decision making on knowledge dissemination strategies. We will aim for equal representation among the researchers, clinicians, and young people involved in each focus group. The consent form and group norms will be reviewed with participants at the start of each focus group discussion. Focus groups will be co-facilitated by



## SCOPING REVIEW PROTOCOL

1 two members of the review team (AN, MD) virtually using a semi-structured interview guide.  
2  
3 Audio recordings will be transcribed verbatim to complete directed content analysis (66).  
4  
5 Complete methods and results will be detailed in the final report (including stakeholder group  
6 characteristics, sample size, data collection tools, analysis, and findings) (43). Several  
7 recommendations to enhance the trustworthiness of qualitative content analysis will be employed  
8 (67,68), including: (i) member checking, (ii) clear description of the context and participant  
9 characteristics, (iii) transparent reporting of the coding process and agreement, and (iv) use of  
10 illustrative quotes, as well as frequencies / counts where appropriate, to summarize results.

11  
12 Guided by scoping review practices, stakeholder engagement will promote a more  
13 collaborative approach, emphasize the voices of young people and knowledge users, and  
14 ultimately maximize the potential contribution of the research (43). Particularly, involving  
15 transition-age youth with SMI as part of the review process will facilitate feedback on the  
16 relevance and usefulness of the review findings. This is considered essential for not only  
17 advancing research and practice in youth mental health, but also addressing recent concerns of  
18 the “weaponization” of resiliency in rehabilitation (e.g., adding stress, pressure, or individual  
19 onus to “become resilient” at times of increased vulnerability) by drawing on the values and  
20 perspectives of young people (69–71).

### **Patient and Public Involvement**

21 Patients and members of the public have not been involved in the design of this scoping  
22 review and the protocol development. However, the perspectives of transition-age youth who  
23 have experienced SMI will be gathered during the review process. Their feedback will inform  
24 our methods, interpretation of results, and knowledge dissemination plan.

### **Ethics and Dissemination**

## SCOPING REVIEW PROTOCOL

1 This scoping review study received approval by the University of Toronto Health  
2 Sciences Research Ethics Board to conduct the community stakeholder input and reaction  
3 meetings (stage 6), which involve collection and analysis of primary data. Results of the review  
4 will be disseminated through traditional approaches, including open-access peer-reviewed  
5 publication(s), presentations at 1-2 national/international conferences, and a plain-language  
6 summary report. Additional knowledge translation strategies may be used dependent on  
7 community stakeholder feedback to share findings, key messages and future directions (e.g.,  
8 infographics, social media).

## SCOPING REVIEW PROTOCOL

- 1  
2  
3 1 **Contributorship Statement:** AN led the conceptualization of this review and drafted the  
4  
5 2 protocol manuscript with support from CS, MD, SB, NK, and EN. MD was involved in the  
6  
7 3 review design and refining the search strategy. CS, SB, NK, and EN were also involved in the  
8  
9 4 review design, and the development of the eligibility criteria and data extraction forms. All  
10  
11 5 authors provided feedback on the manuscript and approval for submitting this protocol  
12  
13 6 manuscript for publication.  
14  
15  
16 7 **Competing Interests:** None declared. There are no competing interests for any author.  
17  
18 8 **Funding:** This research received no specific grant from any funding agency in the public,  
19  
20 9 commercial or not-for-profit sectors.  
21  
22  
23 10 **Data Sharing Statement:** No data are associated with this article.  
24  
25  
26 11 **Patient Consent:** Not required.  
27  
28 12 **License Statement:** I, the Submitting Author has the right to grant and does grant on behalf of  
29  
30 13 all authors of the Work (as defined in the below author licence), an exclusive licence and/or a  
31  
32 14 non-exclusive licence for contributions from authors who are: i) UK Crown employees; ii) where  
33  
34 15 BMJ has agreed a CC-BY licence shall apply, and/or iii) in accordance with the terms applicable  
35  
36 16 for US Federal Government officers or employees acting as part of their official duties; on a  
37  
38 17 worldwide, perpetual, irrevocable, royalty-free basis to BMJ Publishing Group Ltd (“BMJ”) its  
39  
40 18 licensees and where the relevant Journal is co-owned by BMJ to the co-owners of the Journal, to  
41  
42 19 publish the Work in BMJ Open and any other BMJ products and to exploit all rights, as set out in  
43  
44 20 our licence.  
45  
46  
47 21 **Acknowledgements:** We would like to acknowledge Julia Martyniuk, Health Sciences Librarian  
48  
49 22 (University of Toronto), for their expertise and assistance in developing the search strategy for  
50  
51 23 this scoping review.  
52  
53  
54  
55  
56  
57  
58  
59  
60

## SCOPING REVIEW PROTOCOL

**References**

1. McGorry P. Transition to adulthood: The critical period for pre-emptive, disease-modifying care for schizophrenia and related disorders. *Schizophr Bull.* 2011 May 1;37(3):524–30.
2. Pearson, C., Janz, T., & Ali J. Mental and substance use disorders in Canada. *Health at a Glance.* Statistics Canada. Catalogue no. 82-624-X. 2013.
3. Arnett JJ, Žukauskienė R, Sugimura K. The new life stage of emerging adulthood at ages 18–29 years: Implications for mental health. *The Lancet Psychiatry.* 2014 Dec;1(7):569–76.
4. Yung, A. R., Cotter, J., & McGorry PD. *Youth Mental Health: Approaches to Emerging Mental Ill-Health in Young People.* Routledge; 2020.
5. Rehm J, Shield KD. Global burden of disease and the impact of mental and addictive disorders. *Curr Psychiatry Rep.* 2019 Feb 7;21(2):10.
6. Fusar-Poli P. Integrated mental health services for the developmental period (0 to 25 Years): A critical review of the evidence. *Front Psychiatry.* 2019 Jun 7;10.
7. Stoep, A. V., Beresford, S. A., Weiss, N. S., McKnight, B., Cauce, A. M., & Cohen P. Community-based study of the transition to adulthood for adolescents with psychiatric disorder. *Am J Epidemiol.* 2000 Aug 15;152(4):352–62.
8. Lozano R, Naghavi M, Foreman K, Lim S, Shibuya K, Aboyans V, et al. Global and regional mortality from 235 causes of death for 20 age groups in 1990 and 2010: A systematic analysis for the Global Burden of Disease Study 2010. *Lancet.* 2012 Dec;380(9859):2095–128.
9. World Health Organization. *Mental health and substance use: Suicide data [Internet].*

## SCOPING REVIEW PROTOCOL

- 1  
2  
3 1 2019. Available from: [https://www.who.int/teams/mental-health-and-substance-use/data-](https://www.who.int/teams/mental-health-and-substance-use/data-research/suicide-data)  
4  
5 2 research/suicide-data  
6  
7  
8 3 10. Burgess PM, Pirkis JE, Slade TN, Johnston AK, Meadows GN, Gunn JM. Service use for  
9  
10 4 mental health problems: Findings from the 2007 National Survey of Mental Health and  
11  
12 5 Wellbeing. *Aust New Zeal J Psychiatry*. 2009 Jul 1;43(7):615–23.  
13  
14 6 11. Mental Health Commission of Canada. Changing directions, changing lives: The mental  
15  
16 7 health strategy for Canada. 2021.  
17  
18 8 12. Ministry of Health and Long-Term Care. Respect, recovery, resilience: Recommendations  
19  
20 9 for Ontario’s mental health & addictions strategy. 2011.  
21  
22 10 13. World Health Organization. Mental health action plan 2013-2020 [Internet]. 2013.  
23  
24 11 Available from: <https://apps.who.int/iris/handle/10665/89966>  
25  
26 12 14. World Health Organization. Guidelines on mental health promotive and preventive  
27  
28 13 interventions for adolescents: Helping adolescents thrive. 2020.  
29  
30 14 15. Fine SB. Resilience and human adaptability: Who rises above adversity? *Am J Occup*  
31  
32 15 *Ther*. 1991 Jun 1;45(6):493–503.  
33  
34 16 16. Masten AS. Ordinary magic: Resilience processes in development. *Am Psychol*.  
35  
36 17 2001;56(3):227–38.  
37  
38 18 17. Luthar SS, Cicchetti D, Becker B. The construct of resilience: A critical evaluation and  
39  
40 19 guidelines for future work. *Child Dev*. 2000 May 28;71(3):543–62.  
41  
42 20 18. Ungar M. *The social ecology of resilience: A handbook of theory and practice*. Springer  
43  
44 21 Science & Business Media; 2011.  
45  
46 22 19. Fletcher D, Sarkar M. Psychological resilience: A review and critique of definitions,  
47  
48 23 concepts, and theory. *Eur Psychol*. 2013 Jan;18(1):12–23.  
49  
50  
51  
52  
53  
54  
55  
56  
57  
58  
59  
60

## SCOPING REVIEW PROTOCOL

- 1 20. Gillespie BM, Chaboyer W, Wallis M. Development of a theoretically derived model of  
2 resilience through concept analysis. *Contemp Nurse*. 2007 May 17;25(1-2):124-35.
- 3 21. Rutten BPF, Hammels C, Geschwind N, Menne-Lothmann C, Pishva E, Schruers K, et al.  
4 Resilience in mental health: Linking psychological and neurobiological perspectives. *Acta*  
5 *Psychiatr Scand*. 2013 Jul 14;128(1):3-20.
- 6 22. Rutter M. Resilience in the face of adversity: Protective factors and resistance to  
7 psychiatric disorder. *Br J Psychiatry*. 1985 Dec 29;147(6):598-611.
- 8 23. Schwarz S. Resilience in psychology: A critical analysis of the concept. *Theory Psychol*.  
9 2018 Aug 29;28(4):528-41.
- 10 24. Van Vliet KJ. Shame and resilience in adulthood: A grounded theory study. *J Couns*  
11 *Psychol*. 2008 Apr;55(2):233-45.
- 12 25. Nalder E, Hartman L, Hunt A, King G. Traumatic brain injury resiliency model: A  
13 conceptual model to guide rehabilitation research and practice. *Disabil Rehabil*. 2019 Oct  
14 23;41(22):2708-17.
- 15 26. Masten AS, Lucke CM, Nelson KM, Stallworthy IC. Resilience in development and  
16 psychopathology: Multisystem perspectives. *Annu Rev Clin Psychol*. 2021 May  
17 7;17(1):521-49.
- 18 27. Ungar M, Theron L. Resilience and mental health: How multisystemic processes  
19 contribute to positive outcomes. *The Lancet Psychiatry*. 2020 May;7(5):441-8.
- 20 28. Wathen CN, MacGregor JC, Hammerton J, Coben JH, Herrman H, Stewart DE, et al.  
21 Priorities for research in child maltreatment, intimate partner violence and resilience to  
22 violence exposures: Results of an international Delphi consensus development process.  
23 *BMC Public Health*. 2012 Dec 21;12(1):684.

## SCOPING REVIEW PROTOCOL

- 1  
2  
3 1 29. Stainton A, Chisholm K, Kaiser N, Rosen M, Upthegrove R, Ruhrmann S, et al.  
4  
5 2 Resilience as a multimodal dynamic process. *Early Interv Psychiatry*. 2019  
6  
7 Aug;13(4):725–32.  
8  
9  
10 4 30. Davydov DM, Stewart R, Ritchie K, Chaudieu I. Resilience and mental health. *Clin*  
11  
12 5 *Psychol Rev*. 2010 Jul;30(5):479–95.  
13  
14 6 31. Schrank B, Brownell T, Tylee A, Slade M. Positive psychology: An approach to  
15  
16 supporting recovery in mental illness. *East Asian Arch Psychiatry*. 2014 Sep;24(3):95–  
17  
18 7 103.  
19  
20 8  
21 9 32. Echezarraga A, Las Hayas C, López de Arroyabe E, Jones SH. Resilience and recovery in  
22  
23 the context of psychological disorders. *J Humanist Psychol*. 2019 May  
24  
25 10 29;002216781985162.  
26  
27 11  
28 12 33. Friesen BJ. Recovery and resilience in children’s mental health: Views from the field.  
29  
30 *Psychiatr Rehabil J*. 2007;31(1):38–48.  
31  
32 13  
33 14 34. Jacob KS. Recovery model of mental illness: A complementary approach to psychiatric  
34  
35 15 care. *Indian J Psychol Med*. 2015 Apr 1;37(2):117–9.  
36  
37 16 35. Rayner S, Thielking M, Lough R. A new paradigm of youth recovery: Implications for  
38  
39 youth mental health service provision. *Aust J Psychol*. 2018 Dec 1;70(4):330–40.  
40  
41 17  
42 18 36. Meyer PS, Gottlieb JD, Penn D, Mueser K, Gingerich S. Individual Resiliency training:  
43  
44 19 An early intervention approach to enhance well-being in people with first-episode  
45  
46 20 psychosis. *Psychiatr Ann*. 2015 Nov;45(11):554–60.  
47  
48 21 37. Oliver KG, Collin P, Burns J, Nicholas J. Building resilience in young people through  
49  
50 meaningful participation. *Aust e-Journal Adv Ment Heal*. 2006 Jan 17;5(1):34–40.  
51  
52 22  
53 23 38. Fusar-Poli P, Solmi M, Brondino N, Davies C, Chae C, Politi P, et al. Transdiagnostic

## SCOPING REVIEW PROTOCOL

- 1 psychiatry: A systematic review. *World Psychiatry*. 2019 Jun 6;18(2):192–207.
- 2
- 3 1
- 4
- 5 2 39. Fritz J, de Graaff AM, Caisley H, van Harmelen A-L, Wilkinson PO. A systematic review
- 6
- 7 of amenable resilience factors that moderate and/or mediate the relationship between
- 8
- 9 childhood adversity and mental health in young people. *Front Psychiatry*. 2018 Jun 19;9.
- 10
- 11 4
- 12 40. Colquhoun HL, Levac D, O'Brien KK, Straus S, Tricco AC, Perrier L, et al. Scoping
- 13
- 14 reviews: Time for clarity in definition, methods, and reporting. *J Clin Epidemiol*. 2014
- 15
- 16 Dec;67(12):1291–4.
- 17
- 18
- 19 8 41. Munn Z, Peters MDJ, Stern C, Tufanaru C, McArthur A, Aromataris E. Systematic review
- 20
- 21 or scoping review? Guidance for authors when choosing between a systematic or scoping
- 22
- 23 review approach. *BMC Med Res Methodol*. 2018 Dec 19;18(1):143.
- 24
- 25
- 26 11 42. Arksey H, O'Malley L. Scoping studies: Towards a methodological framework. *Int J Soc*
- 27
- 28 *Res Methodol*. 2005 Feb;8(1):19–32.
- 29
- 30
- 31 13 43. Levac D, Colquhoun H, O'Brien KK. Scoping studies: Advancing the methodology.
- 32
- 33 *Implement Sci*. 2010 Dec 20;5(1):69.
- 34
- 35 15 44. Peters MDJ, Marnie C, Tricco AC, Pollock D, Munn Z, Alexander L, et al. Updated
- 36
- 37 methodological guidance for the conduct of scoping reviews. *JBMI Evid Synth*. 2020
- 38
- 39 Oct;18(10):2119–26.
- 40
- 41
- 42 18 45. Tricco AC, Lillie E, Zarin W, O'Brien KK, Colquhoun H, Levac D, et al. PRISMA
- 43
- 44 Extension for Scoping Reviews (PRISMA-ScR): Checklist and Explanation. *Ann Intern*
- 45
- 46 *Med*. 2018 Oct 2;169(7):467–73.
- 47
- 48
- 49 21 46. Moher D, Shamseer L, Clarke M, Ghersi D, Liberati A, Petticrew M, et al. Preferred
- 50
- 51 reporting items for systematic review and meta-analysis protocols (PRISMA-P) 2015
- 52
- 53 statement. *Syst Rev*. 2015 Dec 1;4(1):1.
- 54
- 55
- 56
- 57
- 58
- 59
- 60



## SCOPING REVIEW PROTOCOL

- 1 47. McGorry P, Bates T, Birchwood M. Designing youth mental health services for the 21st  
2 century: Examples from Australia, Ireland and the UK. *Br J Psychiatry*. 2013 Jan  
3 2;202(s54):s30–5.
- 4 48. Mueser KT, Penn DL, Addington J, Brunette MF, Gingerich S, Glynn SM, et al. The  
5 NAVIGATE program for first-episode psychosis: Rationale, overview, and description of  
6 psychosocial components. *Psychiatr Serv*. 2015 Jul;66(7):680–90.
- 7 49. Perovic B. Defining youth in contemporary national legal and policy framework across  
8 Europe. Partnership between the European Commission and the Council of Europe in the  
9 field of youth. 2016.
- 10 50. United Nations. Definition of youth [Internet]. 2013. Available from: [http://www.un.org/](http://www.un.org/esa/socdev/documents/youth/fact-sheets/youth-definition.pdf)  
11 [esa/socdev/documents/youth/fact-sheets/youth-definition.pdf](http://www.un.org/esa/socdev/documents/youth/fact-sheets/youth-definition.pdf).
- 12 51. National Institute of Mental Health. Mental illness [Internet]. 2021. Available from:  
13 <https://www.nimh.nih.gov/health/statistics/mental-illness.shtml#:~:text=Serious mental>  
14 [illness \(SMI\) is,or more major life activities](https://www.nimh.nih.gov/health/statistics/mental-illness.shtml#:~:text=Serious mental)
- 15 52. Substance Abuse and Mental Health Services Administration. Behind the term: Serious  
16 mental illness. Development Services Group, Inc. [Internet]. 2016. Available from:  
17 <https://www.hsdl.org/?abstract&did=801613>
- 18 53. Substance Abuse and Mental Health Services Administration. Adults with SMI and  
19 children/youth with SED. U.S. Department of Health and Human Services. 2020;
- 20 54. McGowan J, Sampson M, Salzwedel DM, Cogo E, Foerster V, Lefebvre C. PRESS peer  
21 review of electronic search strategies: 2015 guideline statement. *J Clin Epidemiol*. 2016  
22 Jul;75:40–6.
- 23 55. Veritas Health Innovation. Covidence systematic review software [Internet]. 2021.

## SCOPING REVIEW PROTOCOL

- 1 Available from: [www.covidence.org](http://www.covidence.org)
- 2
- 3 1
- 4
- 5 2 56. Raanaas RK, Bjøntegaard HØ, Shaw L. A scoping review of participatory action research
- 6
- 7 to promote mental health and resilience in youth and adolescents. *Adolesc Res Rev*. 2020
- 8
- 9 Jun 1;5(2):137–52.
- 10
- 11 4
- 12 57. McGorry PD, Mei C. Early intervention in youth mental health: Progress and future
- 13
- 14 directions. *Evid Based Ment Heal*. 2018 Nov;21(4):182–4.
- 15
- 16 6
- 17 58. Greenhalgh T, Robert G, Macfarlane F, Bate P, Kyriakidou O, Peacock R. Storylines of
- 18
- 19 research in diffusion of innovation: A meta-narrative approach to systematic review. *Soc*
- 20
- 21 *Sci Med*. 2005 Jul;61(2):417–30.
- 22
- 23 9
- 24 10 59. Barry CA, Britten N, Barber N, Bradley C, Stevenson F. Using reflexivity to optimize
- 25
- 26 teamwork in qualitative research. *Qual Health Res*. 1999 Jan 1;9(1):26–44.
- 27
- 28 12
- 29 60. Finlay L. Negotiating the swamp: The opportunity and challenge of reflexivity in research
- 30
- 31 practice. *Qual Res*. 2002 Aug 17;2(2):209–30.
- 32
- 33 14 61. Jacobson D, Mustafa N. Social identity map: A reflexivity tool for practicing explicit
- 34
- 35 positionality in critical qualitative research. *Int J Qual Methods*. 2019 Jan
- 36
- 37 1;18:160940691987007.
- 38
- 39 16
- 40 17 62. Keown K, Van Eerd D, Irvin E. Stakeholder engagement opportunities in systematic
- 41
- 42 reviews: Knowledge transfer for policy and practice. *J Contin Educ Health Prof*.
- 43
- 44 2008;28(2):67–72.
- 45
- 46 19
- 47 20 63. Sabiston CM, Vani M, DeJonge M, Nesbitt A. Scoping reviews and rapid reviews. *Int Rev*
- 48
- 49 *Sport Exerc Psychol*. 2022.
- 50
- 51 22 64. Hennink MM, Kaiser BN, Weber MB. What influences saturation? Estimating sample
- 52
- 53 sizes in focus group research. *Qual Health Res*. 2019;29(10):1483–96.
- 54
- 55
- 56
- 57
- 58
- 59
- 60

## SCOPING REVIEW PROTOCOL

- 1  
2  
3 1 65. O'Brien K, Wilkins A, Zack E, Solomon P. Scoping the Field: Identifying Key Research  
4  
5 2 Priorities in HIV and Rehabilitation. *AIDS Behav.* 2010 Apr 10;14(2):448–58.  
6  
7 3 66. Hsieh H-F, Shannon SE. Three approaches to qualitative content analysis. *Qual Health*  
8  
9 4 Res. 2005 Nov 1;15(9):1277–88.  
10  
11 5 67. Graneheim U., Lundman B. Qualitative content analysis in nursing research: Concepts,  
12  
13 6 procedures and measures to achieve trustworthiness. *Nurse Educ Today.* 2004  
14  
15 7 Feb;24(2):105–12.  
16  
17 8 68. Elo S, Kääriäinen M, Kanste O, Pölkki T, Utriainen K, Kyngäs H. Qualitative content  
18  
19 9 analysis: A focus on trustworthiness. *SAGE Open.* 2014 Jan 1;4(1):215824401452263.  
20  
21 10 69. Hutcheon E, Lashewicz B. Theorizing resilience: Critiquing and unbounding a  
22  
23 11 marginalizing concept. *Disabil Soc.* 2014 Oct 21;29(9):1383–97.  
24  
25 12 70. McCrae N. The weaponizing of mental health. *J Adv Nurs.* 2019 Apr 24;75(4):709–10.  
26  
27 13 71. Shalanski L, Ewashen C. An interpretive phenomenological study of recovering from  
28  
29 14 mental illness: Teenage girls' portrayals of resilience. *Int J Ment Health Nurs.* 2019 Apr  
30  
31 15 24;28(2):492–500.  
32  
33  
34  
35  
36  
37  
38  
39  
40  
41  
42  
43  
44  
45  
46  
47  
48  
49  
50  
51  
52  
53  
54  
55  
56  
57  
58  
59  
60

## SCOPING REVIEW PROTOCOL

## Appendix A

## PRISMA-P Checklist

|                           |                     | Reporting Item                                                                                                                                                                                                                | Page Number |
|---------------------------|---------------------|-------------------------------------------------------------------------------------------------------------------------------------------------------------------------------------------------------------------------------|-------------|
| <b>Title</b>              |                     |                                                                                                                                                                                                                               |             |
| Identification            | <a href="#">#1a</a> | Identify the report as a protocol of a systematic review                                                                                                                                                                      | 2           |
| Update                    | <a href="#">#1b</a> | If the protocol is for an update of a previous systematic review, identify as such                                                                                                                                            | N/A         |
| <b>Registration</b>       |                     |                                                                                                                                                                                                                               |             |
|                           | <a href="#">#2</a>  | If registered, provide the name of the registry (such as PROSPERO) and registration number                                                                                                                                    | 2, 8        |
| <b>Authors</b>            |                     |                                                                                                                                                                                                                               |             |
| Contact                   | <a href="#">#3a</a> | Provide name, institutional affiliation, e-mail address of all protocol authors; provide physical mailing address of corresponding author                                                                                     | 1           |
| Contribution              | <a href="#">#3b</a> | Describe contributions of protocol authors and identify the guarantor of the review                                                                                                                                           | 1, 23       |
| <b>Amendments</b>         |                     |                                                                                                                                                                                                                               |             |
|                           | <a href="#">#4</a>  | If the protocol represents an amendment of a previously completed or published protocol, identify as such and list changes; otherwise, state plan for documenting important protocol amendments                               | N/A         |
| <b>Support</b>            |                     |                                                                                                                                                                                                                               |             |
| Sources                   | <a href="#">#5a</a> | Indicate sources of financial or other support for the review                                                                                                                                                                 | --          |
| Sponsor                   | <a href="#">#5b</a> | Provide name for the review funder and / or sponsor                                                                                                                                                                           | --          |
| Role of sponsor or funder | <a href="#">#5c</a> | Describe roles of funder(s), sponsor(s), and / or institution(s), if any, in developing the protocol                                                                                                                          | --          |
| <b>Introduction</b>       |                     |                                                                                                                                                                                                                               |             |
| Rationale                 | <a href="#">#6</a>  | Describe the rationale for the review in the context of what is already known                                                                                                                                                 | 4-7         |
| Objectives                | <a href="#">#7</a>  | Provide an explicit statement of the question(s) the review will address with reference to participants, interventions, comparators, and outcomes (PICO)                                                                      | 8-10        |
| <b>Methods</b>            |                     |                                                                                                                                                                                                                               |             |
| Eligibility criteria      | <a href="#">#8</a>  | Specify the study characteristics (such as PICO, study design, setting, time frame) and report characteristics (such as years considered, language, publication status) to be used as criteria for eligibility for the review | 11-14       |

## SCOPING REVIEW PROTOCOL

|    |                    |                      |                                                           |
|----|--------------------|----------------------|-----------------------------------------------------------|
| 1  |                    |                      |                                                           |
| 2  |                    |                      |                                                           |
| 3  | Information        | <a href="#">#9</a>   | Describe all intended information sources (such as        |
| 4  | sources            |                      | electronic databases, contact with study authors, trial   |
| 5  |                    |                      | registers or other grey literature sources) with planned  |
| 6  |                    |                      | dates of coverage                                         |
| 7  |                    |                      |                                                           |
| 8  | Search strategy    | <a href="#">#10</a>  | Present draft of search strategy to be used for at least  |
| 9  |                    |                      | one electronic database, including planned limits,        |
| 10 |                    |                      | such that it could be repeated                            |
| 11 |                    |                      |                                                           |
| 12 | Study records -    | <a href="#">#11a</a> | Describe the mechanism(s) that will be used to            |
| 13 | data management    |                      | manage records and data throughout the review             |
| 14 | Study records -    | <a href="#">#11b</a> | State the process that will be used for selecting         |
| 15 | selection process  |                      | studies (such as two independent reviewers) through       |
| 16 |                    |                      | each phase of the review (that is, screening, eligibility |
| 17 |                    |                      | and inclusion in meta-analysis)                           |
| 18 |                    |                      |                                                           |
| 19 | Study records -    | <a href="#">#11c</a> | Describe planned method of extracting data from           |
| 20 | data collection    |                      | reports (such as piloting forms, done independently,      |
| 21 | process            |                      | in duplicate), any processes for obtaining and            |
| 22 |                    |                      | confirming data from investigators                        |
| 23 |                    |                      |                                                           |
| 24 | Data items         | <a href="#">#12</a>  | List and define all variables for which data will be      |
| 25 |                    |                      | sought (such as PICO items, funding sources), any         |
| 26 |                    |                      | pre-planned data assumptions and simplifications          |
| 27 |                    |                      |                                                           |
| 28 | Outcomes and       | <a href="#">#13</a>  | List and define all outcomes for which data will be       |
| 29 | prioritization     |                      | sought, including prioritization of main and additional   |
| 30 |                    |                      | outcomes, with rationale                                  |
| 31 |                    |                      |                                                           |
| 32 | Risk of bias in    | <a href="#">#14</a>  | Describe anticipated methods for assessing risk of        |
| 33 | individual studies |                      | bias of individual studies, including whether this will   |
| 34 |                    |                      | be done at the outcome or study level, or both; state     |
| 35 |                    |                      | how this information will be used in data synthesis       |
| 36 |                    |                      |                                                           |
| 37 | Data synthesis     | <a href="#">#15a</a> | Describe criteria under which study data will be          |
| 38 |                    |                      | quantitatively synthesised                                |
| 39 |                    |                      |                                                           |
| 40 | Data synthesis     | <a href="#">#15b</a> | If data are appropriate for quantitative synthesis,       |
| 41 |                    |                      | describe planned summary measures, methods of             |
| 42 |                    |                      | handling data and methods of combining data from          |
| 43 |                    |                      | studies, including any planned exploration of             |
| 44 |                    |                      | consistency (such as I <sup>2</sup> , Kendall's $\tau$ )  |
| 45 |                    |                      |                                                           |
| 46 | Data synthesis     | <a href="#">#15c</a> | Describe any proposed additional analyses (such as        |
| 47 |                    |                      | sensitivity or subgroup analyses, meta-regression)        |
| 48 |                    |                      |                                                           |
| 49 | Data synthesis     | <a href="#">#15d</a> | If quantitative synthesis is not appropriate, describe    |
| 50 |                    |                      | the type of summary planned                               |
| 51 |                    |                      |                                                           |
| 52 |                    |                      |                                                           |
| 53 |                    |                      |                                                           |
| 54 |                    |                      |                                                           |
| 55 |                    |                      |                                                           |
| 56 |                    |                      |                                                           |
| 57 |                    |                      |                                                           |
| 58 |                    |                      |                                                           |
| 59 |                    |                      |                                                           |
| 60 |                    |                      |                                                           |

## SCOPING REVIEW PROTOCOL

|    |               |                     |                                                     |            |
|----|---------------|---------------------|-----------------------------------------------------|------------|
| 1  |               |                     |                                                     |            |
| 2  |               |                     |                                                     |            |
| 3  | Meta-bias(es) | <a href="#">#16</a> | Specify any planned assessment of meta-bias(es)     | See note 2 |
| 4  |               |                     | (such as publication bias across studies, selective |            |
| 5  |               |                     | reporting within studies)                           |            |
| 6  |               |                     |                                                     |            |
| 7  | Confidence in | <a href="#">#17</a> | Describe how the strength of the body of evidence   | See note 3 |
| 8  | cumulative    |                     | will be assessed (such as GRADE)                    |            |
| 9  | evidence      |                     |                                                     |            |
| 10 |               |                     |                                                     |            |

---

**Author notes**

1. N/A for scoping reviews
2. N/A for scoping reviews
3. N/A for scoping reviews

Citation: Moher D, Shamseer L, Clarke M, Ghersi D, Liberati A, Petticrew M, Shekelle P, Stewart LA. Preferred Reporting Items for Systematic Review and Meta-Analysis Protocols (PRISMA-P) 2015 statement. Syst Rev. 2015;4(1):1.

The PRISMA-P elaboration and explanation paper is distributed under the terms of the Creative Commons Attribution License CC-BY. This checklist can be completed online using <https://www.goodreports.org/>, a tool made by the [EQUATOR Network](#) in collaboration with [Penelope.ai](#)

SCOPING REVIEW PROTOCOL

Appendix B

Medline Database Search Strategy

| Search line # | PCC conceptual term of interest     | Search term entered into OVID-Medline                                                                                                                                                                                                                                                                                                                                                                                                                                                                                                                                                                                                                                                                                                                                                                                                                                                                                                                                                                                                                                                                                                                                                      |
|---------------|-------------------------------------|--------------------------------------------------------------------------------------------------------------------------------------------------------------------------------------------------------------------------------------------------------------------------------------------------------------------------------------------------------------------------------------------------------------------------------------------------------------------------------------------------------------------------------------------------------------------------------------------------------------------------------------------------------------------------------------------------------------------------------------------------------------------------------------------------------------------------------------------------------------------------------------------------------------------------------------------------------------------------------------------------------------------------------------------------------------------------------------------------------------------------------------------------------------------------------------------|
| 1             | Population (Transition-age youth)   | exp Adolescent/ or exp Young Adult/                                                                                                                                                                                                                                                                                                                                                                                                                                                                                                                                                                                                                                                                                                                                                                                                                                                                                                                                                                                                                                                                                                                                                        |
| 2             | Population (Transition-age youth)   | (youth* or transition age youth* or teen* or adolescen* or emerging adult* or young adult* or early adult* or young person* or young people* or juvenile*).tw,kf.                                                                                                                                                                                                                                                                                                                                                                                                                                                                                                                                                                                                                                                                                                                                                                                                                                                                                                                                                                                                                          |
| 3             | Population (Serious mental illness) | exp Mental Disorders/ or exp Anxiety Disorders/ or exp "Bipolar and Related Disorders"/ or exp Dissociative Disorders/ or exp "Feeding and Eating Disorders"/ or exp Mood Disorders/ or exp "Attention Deficit and Disruptive Behavior Disorders"/ or exp Personality Disorders/ or exp Schizophrenia/ or exp Psychotic Disorders/ or exp Affective Disorders, Psychotic/ or exp Capgras Syndrome/ or exp Delusional Parasitosis/ or exp Morgellons Disease/ or exp Paranoid Disorders/ or exp Somatoform Disorders/ or exp "Trauma and Stressor Related Disorders"/ or exp Mentally Ill Persons/                                                                                                                                                                                                                                                                                                                                                                                                                                                                                                                                                                                          |
| 4             | Population (Serious mental illness) | (mental disorder* or mental illness* or psychiatric disabilit* or psychiatric disorder* or psychiatric diagnosis* or serious emotional disturbance* or severe emotional disturbance* or "mental health condition*" or anxiety disorder* or phobia* or phobic disorder* or panic disorder* or obsessive-compulsive disorder* or OCD or bipolar disorder* or manic disorder* or manic depression or dissociative disorder* or multiple-personality disorder or eating disorder* or anorexi* or bulimi* or binge eating* or "eating disorder not otherwise specified" or EDNOS or "other specified feeding or eating disorder" or OSFED or disordered eating or mood disorder* or depressive disorder* or affective disorder* or depression or cyclothymic disorder* or cyclothymia or dysthymic disorder* or dysthymia or personality disorder* or schizophrenia spectrum disorder* or schizophrenia or psychotic disorder* or psychosis or psychoses or schizoaffective disorder* or psychotic affective disorder* or paranoid disorder* or somatoform disorder* or body dysmorphic disorder* or body dysmorphi* or post-traumatic stress disorder* or adjustment disorder* or PTSD).tw,kf. |
| 5             | Concept (Resilience)                | exp Resilience, Psychological/                                                                                                                                                                                                                                                                                                                                                                                                                                                                                                                                                                                                                                                                                                                                                                                                                                                                                                                                                                                                                                                                                                                                                             |
| 6             | Concept (Resilience)                | (resilienc*).tw,kf.                                                                                                                                                                                                                                                                                                                                                                                                                                                                                                                                                                                                                                                                                                                                                                                                                                                                                                                                                                                                                                                                                                                                                                        |
| 7             |                                     | 1 or 2                                                                                                                                                                                                                                                                                                                                                                                                                                                                                                                                                                                                                                                                                                                                                                                                                                                                                                                                                                                                                                                                                                                                                                                     |
| 8             |                                     | 3 or 4                                                                                                                                                                                                                                                                                                                                                                                                                                                                                                                                                                                                                                                                                                                                                                                                                                                                                                                                                                                                                                                                                                                                                                                     |
| 9             |                                     | 5 or 6                                                                                                                                                                                                                                                                                                                                                                                                                                                                                                                                                                                                                                                                                                                                                                                                                                                                                                                                                                                                                                                                                                                                                                                     |
| 10            |                                     | 7 and 8 and 9                                                                                                                                                                                                                                                                                                                                                                                                                                                                                                                                                                                                                                                                                                                                                                                                                                                                                                                                                                                                                                                                                                                                                                              |
| 11            |                                     | limit 10 to (english language and humans and yr="2000 - Current")                                                                                                                                                                                                                                                                                                                                                                                                                                                                                                                                                                                                                                                                                                                                                                                                                                                                                                                                                                                                                                                                                                                          |

## SCOPING REVIEW PROTOCOL

## Embase Database Search Strategy

| Search line # | PCC conceptual term of interest     | Search term entered into OVID-Embase                                                                                                                                                                                                                                                                                                                                                                                                                                                                                                                                                                                                                                                                                                                                                                                                                                                                                                                                                                                                                                                                                                                                                       |
|---------------|-------------------------------------|--------------------------------------------------------------------------------------------------------------------------------------------------------------------------------------------------------------------------------------------------------------------------------------------------------------------------------------------------------------------------------------------------------------------------------------------------------------------------------------------------------------------------------------------------------------------------------------------------------------------------------------------------------------------------------------------------------------------------------------------------------------------------------------------------------------------------------------------------------------------------------------------------------------------------------------------------------------------------------------------------------------------------------------------------------------------------------------------------------------------------------------------------------------------------------------------|
| 1             | Population (Transition-age youth)   | exp Adolescent/ or exp Young Adult/                                                                                                                                                                                                                                                                                                                                                                                                                                                                                                                                                                                                                                                                                                                                                                                                                                                                                                                                                                                                                                                                                                                                                        |
| 2             | Population (Transition-age youth)   | (youth* or transition age youth* or teen* or adolescen* or emerging adult* or young adult* or early adult* or young person* or young people* or juvenile*).tw,kf.                                                                                                                                                                                                                                                                                                                                                                                                                                                                                                                                                                                                                                                                                                                                                                                                                                                                                                                                                                                                                          |
| 3             | Population (Serious mental illness) | exp Mental Disease/ or exp Anxiety Disorder/ or exp Bipolar Disorder/ or exp Dissociative Disorder/ or exp Eating Disorder/ or exp Emotional Disorder/ or exp Mood Disorder/ or exp Attention Deficit Disorder/ or exp Impulse Control Disorder/ or exp Neurosis/ or exp Personality Disorder/ or exp Schizophrenia Spectrum Disorder/ or exp Schizophrenia/ or exp Psychosis/ or exp Somatoform Disorder/ or exp Posttraumatic Stress Disorder/                                                                                                                                                                                                                                                                                                                                                                                                                                                                                                                                                                                                                                                                                                                                           |
| 4             | Population (Serious mental illness) | (mental disorder* or mental illness* or psychiatric disabilit* or psychiatric disorder* or psychiatric diagnosis* or serious emotional disturbance* or severe emotional disturbance* or "mental health condition*" or anxiety disorder* or phobia* or phobic disorder* or panic disorder* or obsessive-compulsive disorder* or OCD or bipolar disorder* or manic disorder* or manic depression or dissociative disorder* or multiple-personality disorder or eating disorder* or anorexi* or bulimi* or binge eating* or "eating disorder not otherwise specified" or EDNOS or "other specified feeding or eating disorder" or OSFED or disordered eating or mood disorder* or depressive disorder* or affective disorder* or depression or cyclothymic disorder* or cyclothymia or dysthymic disorder* or dysthymia or personality disorder* or schizophrenia spectrum disorder* or schizophrenia or psychotic disorder* or psychosis or psychoses or schizoaffective disorder* or psychotic affective disorder* or paranoid disorder* or somatoform disorder* or body dysmorphic disorder* or body dysmorphi* or post-traumatic stress disorder* or adjustment disorder* or PTSD).tw,kf. |
| 5             | Concept (Resilience)                | exp Psychological Resilience/                                                                                                                                                                                                                                                                                                                                                                                                                                                                                                                                                                                                                                                                                                                                                                                                                                                                                                                                                                                                                                                                                                                                                              |
| 6             | Concept (Resilience)                | (resilienc*).tw,kf.                                                                                                                                                                                                                                                                                                                                                                                                                                                                                                                                                                                                                                                                                                                                                                                                                                                                                                                                                                                                                                                                                                                                                                        |
| 7             |                                     | 1 or 2                                                                                                                                                                                                                                                                                                                                                                                                                                                                                                                                                                                                                                                                                                                                                                                                                                                                                                                                                                                                                                                                                                                                                                                     |
| 8             |                                     | 3 or 4                                                                                                                                                                                                                                                                                                                                                                                                                                                                                                                                                                                                                                                                                                                                                                                                                                                                                                                                                                                                                                                                                                                                                                                     |
| 9             |                                     | 5 or 6                                                                                                                                                                                                                                                                                                                                                                                                                                                                                                                                                                                                                                                                                                                                                                                                                                                                                                                                                                                                                                                                                                                                                                                     |
| 10            |                                     | 7 and 8 and 9                                                                                                                                                                                                                                                                                                                                                                                                                                                                                                                                                                                                                                                                                                                                                                                                                                                                                                                                                                                                                                                                                                                                                                              |
| 11            |                                     | limit 10 to (english language and humans and yr="2000 - Current")                                                                                                                                                                                                                                                                                                                                                                                                                                                                                                                                                                                                                                                                                                                                                                                                                                                                                                                                                                                                                                                                                                                          |



SCOPING REVIEW PROTOCOL

PsychINFO Database Search Strategy

| Search line # | PCC conceptual term of interest     | Search term entered into OVID-PsychINFO                                                                                                                                                                                                                                                                                                                                                                                                                                                                                                                                                                                                                                                                                                                                                                                                                                                                                                                                                                                                                                                                                                                                                 |
|---------------|-------------------------------------|-----------------------------------------------------------------------------------------------------------------------------------------------------------------------------------------------------------------------------------------------------------------------------------------------------------------------------------------------------------------------------------------------------------------------------------------------------------------------------------------------------------------------------------------------------------------------------------------------------------------------------------------------------------------------------------------------------------------------------------------------------------------------------------------------------------------------------------------------------------------------------------------------------------------------------------------------------------------------------------------------------------------------------------------------------------------------------------------------------------------------------------------------------------------------------------------|
| 1             | Population (Transition-age youth)   | exp Emerging Adulthood/ or exp Early Adolescence/                                                                                                                                                                                                                                                                                                                                                                                                                                                                                                                                                                                                                                                                                                                                                                                                                                                                                                                                                                                                                                                                                                                                       |
| 2             | Population (Transition-age youth)   | (youth* or transition age youth* or teen* or adolescen* or emerging adult* or young adult* or early adult* or young person* or young people* or juvenile*).tw.                                                                                                                                                                                                                                                                                                                                                                                                                                                                                                                                                                                                                                                                                                                                                                                                                                                                                                                                                                                                                          |
| 3             | Population (Serious mental illness) | exp Mental Disorders/ or exp Chronic Mental Illness or exp Serious Mental Illness/ or exp Affective Disorders or exp Anxiety Disorders/ or exp Attention Deficit Disorder/ or exp Bipolar Disorder/ or exp Dissociative Disorders/ or exp Disruptive Behavior Disorders/ or exp Eating Disorders/ or exp Personality Disorders/ or exp Psychosis/ or exp Schizophrenia/ or exp Somatoform Disorders/ or exp "Stress and Trauma Related Disorders"/                                                                                                                                                                                                                                                                                                                                                                                                                                                                                                                                                                                                                                                                                                                                      |
| 4             | Population (Serious mental illness) | (mental disorder* or mental illness* or psychiatric disabilit* or psychiatric disorder* or psychiatric diagnosis* or serious emotional disturbance* or severe emotional disturbance* or "mental health condition*" or anxiety disorder* or phobia* or phobic disorder* or panic disorder* or obsessive-compulsive disorder* or OCD or bipolar disorder* or manic disorder* or manic depression or dissociative disorder* or multiple-personality disorder or eating disorder* or anorexi* or bulimi* or binge eating* or "eating disorder not otherwise specified" or EDNOS or "other specified feeding or eating disorder" or OSFED or disordered eating or mood disorder* or depressive disorder* or affective disorder* or depression or cyclothymic disorder* or cyclothymia or dysthymic disorder* or dysthymia or personality disorder* or schizophrenia spectrum disorder* or schizophrenia or psychotic disorder* or psychosis or psychoses or schizoaffective disorder* or psychotic affective disorder* or paranoid disorder* or somatoform disorder* or body dysmorphic disorder* or body dysmorphi* or post-traumatic stress disorder* or adjustment disorder* or PTSD).tw. |
| 5             | Concept (Resilience)                | exp "Resilience (Psychological)"/                                                                                                                                                                                                                                                                                                                                                                                                                                                                                                                                                                                                                                                                                                                                                                                                                                                                                                                                                                                                                                                                                                                                                       |
| 6             | Concept (Resilience)                | (resilienc*).tw.                                                                                                                                                                                                                                                                                                                                                                                                                                                                                                                                                                                                                                                                                                                                                                                                                                                                                                                                                                                                                                                                                                                                                                        |
| 7             |                                     | 1 or 2                                                                                                                                                                                                                                                                                                                                                                                                                                                                                                                                                                                                                                                                                                                                                                                                                                                                                                                                                                                                                                                                                                                                                                                  |
| 8             |                                     | 3 or 4                                                                                                                                                                                                                                                                                                                                                                                                                                                                                                                                                                                                                                                                                                                                                                                                                                                                                                                                                                                                                                                                                                                                                                                  |
| 9             |                                     | 5 or 6                                                                                                                                                                                                                                                                                                                                                                                                                                                                                                                                                                                                                                                                                                                                                                                                                                                                                                                                                                                                                                                                                                                                                                                  |
| 10            |                                     | 7 and 8 and 9                                                                                                                                                                                                                                                                                                                                                                                                                                                                                                                                                                                                                                                                                                                                                                                                                                                                                                                                                                                                                                                                                                                                                                           |
| 11            |                                     | limit 10 to (english language and humans and yr="2000 - Current")                                                                                                                                                                                                                                                                                                                                                                                                                                                                                                                                                                                                                                                                                                                                                                                                                                                                                                                                                                                                                                                                                                                       |

## SCOPING REVIEW PROTOCOL

## AMED Database Search Strategy

| Search line # | PCC conceptual term of interest     | Search term entered into OVID-AMED                                                                                                                                                                                                                                                                                                                                                                                                                                                                                                                                                                                                                                                                                                                                                                                                                                                                                                                                                                                                                                                                                                                                                         |
|---------------|-------------------------------------|--------------------------------------------------------------------------------------------------------------------------------------------------------------------------------------------------------------------------------------------------------------------------------------------------------------------------------------------------------------------------------------------------------------------------------------------------------------------------------------------------------------------------------------------------------------------------------------------------------------------------------------------------------------------------------------------------------------------------------------------------------------------------------------------------------------------------------------------------------------------------------------------------------------------------------------------------------------------------------------------------------------------------------------------------------------------------------------------------------------------------------------------------------------------------------------------|
| 1             | Population (Transition-age youth)   | exp Adolescent/                                                                                                                                                                                                                                                                                                                                                                                                                                                                                                                                                                                                                                                                                                                                                                                                                                                                                                                                                                                                                                                                                                                                                                            |
| 2             | Population (Transition-age youth)   | (youth* or transition age youth* or teen* or adolescen* or emerging adult* or young adult* or early adult* or young person* or young people* or juvenile*).tw,et.                                                                                                                                                                                                                                                                                                                                                                                                                                                                                                                                                                                                                                                                                                                                                                                                                                                                                                                                                                                                                          |
| 3             | Population (Serious mental illness) | exp Mental Disorders/ or exp Adjustment Disorders/ or exp Affective Disorders/ or exp Affective Disorders Psychotic/ or exp Bipolar Disorder/ or exp Manic Disorder/ or exp Depressive Disorder/ or exp Mood Disorders/ or exp Anxiety Disorders/ or exp Obsessive Compulsive Disorder/ or exp Phobic Disorders/ or exp Stress Disorders Post Traumatic/ or exp Attention Deficit Disorder with Hyperactivity or exp Child Behavior Disorders/ or exp Dissociative Disorders/ or exp Multiple Personality Disorder/ or exp Eating Disorders/ or exp Anorexia Nervosa/ or exp Bulimia/ or exp Neurotic Disorders/ or exp Personality Disorders/ or exp Borderline Personality Disorder/ or exp Hysteria/ or exp Psychotic Disorders/ or exp Schizophrenia/ or exp Somatoform Disorders/ or exp Conversion Disorder/                                                                                                                                                                                                                                                                                                                                                                         |
| 4             | Population (Serious mental illness) | (mental disorder* or mental illness* or psychiatric disabilit* or psychiatric disorder* or psychiatric diagnosis* or serious emotional disturbance* or severe emotional disturbance* or "mental health condition*" or anxiety disorder* or phobia* or phobic disorder* or panic disorder* or obsessive-compulsive disorder* or OCD or bipolar disorder* or manic disorder* or manic depression or dissociative disorder* or multiple-personality disorder or eating disorder* or anorexi* or bulimi* or binge eating* or "eating disorder not otherwise specified" or EDNOS or "other specified feeding or eating disorder" or OSFED or disordered eating or mood disorder* or depressive disorder* or affective disorder* or depression or cyclothymic disorder* or cyclothymia or dysthymic disorder* or dysthymia or personality disorder* or schizophrenia spectrum disorder* or schizophrenia or psychotic disorder* or psychosis or psychoses or schizoaffective disorder* or psychotic affective disorder* or paranoid disorder* or somatoform disorder* or body dysmorphic disorder* or body dysmorphi* or post-traumatic stress disorder* or adjustment disorder* or PTSD).tw,et. |
| 5             | Concept (Resilience)                | exp Adaptation Psychological/                                                                                                                                                                                                                                                                                                                                                                                                                                                                                                                                                                                                                                                                                                                                                                                                                                                                                                                                                                                                                                                                                                                                                              |
| 6             | Concept (Resilience)                | (resilienc*).tw,et.                                                                                                                                                                                                                                                                                                                                                                                                                                                                                                                                                                                                                                                                                                                                                                                                                                                                                                                                                                                                                                                                                                                                                                        |
| 7             |                                     | 1 or 2                                                                                                                                                                                                                                                                                                                                                                                                                                                                                                                                                                                                                                                                                                                                                                                                                                                                                                                                                                                                                                                                                                                                                                                     |
| 8             |                                     | 3 or 4                                                                                                                                                                                                                                                                                                                                                                                                                                                                                                                                                                                                                                                                                                                                                                                                                                                                                                                                                                                                                                                                                                                                                                                     |
| 9             |                                     | 5 or 6                                                                                                                                                                                                                                                                                                                                                                                                                                                                                                                                                                                                                                                                                                                                                                                                                                                                                                                                                                                                                                                                                                                                                                                     |
| 10            |                                     | 7 and 8 and 9                                                                                                                                                                                                                                                                                                                                                                                                                                                                                                                                                                                                                                                                                                                                                                                                                                                                                                                                                                                                                                                                                                                                                                              |
| 11            |                                     | limit 10 to (english and yr="2000 -Current")                                                                                                                                                                                                                                                                                                                                                                                                                                                                                                                                                                                                                                                                                                                                                                                                                                                                                                                                                                                                                                                                                                                                               |

SCOPING REVIEW PROTOCOL

CINHAL Database Search Strategy

| Search line # | PCC conceptual term of interest     | Search term entered into CINHAL (EBSCO)                                                                                                                                                                                                                                                                                                                                                                                                                                                                                                                                                                                                                                                                                                                                                                                                                                                                                                                                                                                                                                                                                                                                                                                                                                                                                                                                                                                                                                                                                                                        |
|---------------|-------------------------------------|----------------------------------------------------------------------------------------------------------------------------------------------------------------------------------------------------------------------------------------------------------------------------------------------------------------------------------------------------------------------------------------------------------------------------------------------------------------------------------------------------------------------------------------------------------------------------------------------------------------------------------------------------------------------------------------------------------------------------------------------------------------------------------------------------------------------------------------------------------------------------------------------------------------------------------------------------------------------------------------------------------------------------------------------------------------------------------------------------------------------------------------------------------------------------------------------------------------------------------------------------------------------------------------------------------------------------------------------------------------------------------------------------------------------------------------------------------------------------------------------------------------------------------------------------------------|
| 1             | Population (Transition-age youth)   | (MH "Adolescence+") OR (MH "Young Adult")                                                                                                                                                                                                                                                                                                                                                                                                                                                                                                                                                                                                                                                                                                                                                                                                                                                                                                                                                                                                                                                                                                                                                                                                                                                                                                                                                                                                                                                                                                                      |
| 2             | Population (Transition-age youth)   | TI (youth* or "transition age youth*" or teen* or adolescen* or "emerging adult*" or "young adult*" or "early adult*" or "young person*" or "young people*" or juvenile*) OR AB (youth* or "transition age youth*" or teen* or adolescen* or "emerging adult*" or "young adult*" or "early adult*" or "young person*" or "young people*" or juvenile*)                                                                                                                                                                                                                                                                                                                                                                                                                                                                                                                                                                                                                                                                                                                                                                                                                                                                                                                                                                                                                                                                                                                                                                                                         |
| 3             | Population (Serious mental illness) | (MH "Mental Disorders+") or (MH "Mental Disorders, Chronic") or (MH "Neurotic Disorders+") or (MH "Affective Disorders+") or (MH "Seasonal Affective Disorder") or (MH "Depression+") or (MH "Anxiety Disorders+") or (MH "Social Anxiety Disorders") or (MH "Generalized Anxiety Disorder") or (MH "Panic Disorder") or (MH "Obsessive-Compulsive Disorder+") or (MH "Phobic Disorders+") or (MH "Stress Disorders, Post-Traumatic+") or (MH "Psychotic Disorders+") or (MH "Schizophrenia+") or (MH "Affective Disorders, Psychotic+") or (MH "Bipolar Disorders+") or (MH "Dissociative Disorders+") or (MH "Multiple-Personality Disorder") or (MH "Personality Disorders+") or (MH "Adjustment Disorders+") or (MH "Attention Deficit Hyperactivity Disorder") or (MH "Child Behavior Disorders+") or (MH "Eating Disorders+") or (MH "Binge Eating Disorder") or (MH "Avoidant Restrictive Food Intake Disorder") or (MH "Bulimia Nervosa") or (MH "Bulimia") or (MH "Anorexia Nervosa") or (MH "Anorexia") or (MH "Somatoform Disorders+") or (MH "Body Dysmorphic Disorder")                                                                                                                                                                                                                                                                                                                                                                                                                                                                           |
| 4             | Population (Serious mental illness) | TI ("mental disorder*" or "mental illness*" or "psychiatric disabilit*" or "psychiatric disorder*" or "psychiatric diagnosis*" or "serious emotional disturbance*" or "severe emotional disturbance*" or "mental health condition*" or "anxiety disorder*" or phobia* or "phobic disorder*" or "panic disorder*" or "obsessive-compulsive disorder*" or OCD or "bipolar disorder*" or "manic disorder*" or "manic depression" or "dissociative disorder*" or "multiple-personality disorder" or "eating disorder*" or anorexi* or bulimi* or "binge eating*" or "eating disorder not otherwise specified" or EDNOS or "other specified feeding or eating disorder" or OSFED or "disordered eating" or "mood disorder*" or "depressive disorder*" or "affective disorder*" or depression or "cyclothymic disorder*" or cyclothymia or "dysthymic disorder*" or dysthymia or "personality disorder*" or "schizophrenia spectrum disorder*" or schizophrenia or "psychotic disorder*" or psychosis or psychoses or "schizoaffective disorder*" or "psychotic affective disorder*" or "paranoid disorder*" or "somatoform disorder*" or "body dysmorphic disorder*" or "body dysmorphi*" or "post-traumatic stress disorder*" or "adjustment disorder*" or PTSD) OR AB ("mental disorder*" or "mental illness*" or "psychiatric disabilit*" or "psychiatric disorder*" or "psychiatric diagnosis*" or "serious emotional disturbance*" or "severe emotional disturbance*" or "mental health condition*" or "anxiety disorder*" or phobia* or "phobic disorder*" or |

## SCOPING REVIEW PROTOCOL

|    |                      |                                                                                                                                                                                                                                                                                                                                                                                                                                                                                                                                                                                                                                                                                                                                                                                                                                                                                                                                                               |
|----|----------------------|---------------------------------------------------------------------------------------------------------------------------------------------------------------------------------------------------------------------------------------------------------------------------------------------------------------------------------------------------------------------------------------------------------------------------------------------------------------------------------------------------------------------------------------------------------------------------------------------------------------------------------------------------------------------------------------------------------------------------------------------------------------------------------------------------------------------------------------------------------------------------------------------------------------------------------------------------------------|
|    |                      | “panic disorder*” or “obsessive-compulsive disorder*” or OCD or “bipolar disorder*” or “manic disorder*” or “manic depression” or “dissociative disorder*” or “multiple-personality disorder” or “eating disorder*” or anorexi* or bulimi* or “binge eating*” or “eating disorder not otherwise specified” or EDNOS or “other specified feeding or eating disorder” or OSFED or “disordered eating” or “mood disorder*” or “depressive disorder*” or “affective disorder*” or depression or “cyclothymic disorder*” or cyclothymia or “dysthymic disorder*” or dysthymia or “personality disorder*” or “schizophrenia spectrum disorder*” or schizophrenia or “psychotic disorder*” or psychosis or psychoses or “schizoaffective disorder*” or “psychotic affective disorder*” or “paranoid disorder*” or “somatoform disorder*” or “body dysmorphic disorder*” or “body dysmorphi*” or “post-traumatic stress disorder*” or “adjustment disorder*” or PTSD) |
| 5  | Concept (Resilience) | (MH “Hardiness”)                                                                                                                                                                                                                                                                                                                                                                                                                                                                                                                                                                                                                                                                                                                                                                                                                                                                                                                                              |
| 6  | Concept (Resilience) | TI (resilienc*) OR AB (resilienc*)                                                                                                                                                                                                                                                                                                                                                                                                                                                                                                                                                                                                                                                                                                                                                                                                                                                                                                                            |
| 7  |                      | 1 or 2                                                                                                                                                                                                                                                                                                                                                                                                                                                                                                                                                                                                                                                                                                                                                                                                                                                                                                                                                        |
| 8  |                      | 3 or 4                                                                                                                                                                                                                                                                                                                                                                                                                                                                                                                                                                                                                                                                                                                                                                                                                                                                                                                                                        |
| 9  |                      | 5 or 6                                                                                                                                                                                                                                                                                                                                                                                                                                                                                                                                                                                                                                                                                                                                                                                                                                                                                                                                                        |
| 10 |                      | 7 and 8 and 9                                                                                                                                                                                                                                                                                                                                                                                                                                                                                                                                                                                                                                                                                                                                                                                                                                                                                                                                                 |
| 11 |                      | limit 10 to (english language and humans and yr="2000 - Current")                                                                                                                                                                                                                                                                                                                                                                                                                                                                                                                                                                                                                                                                                                                                                                                                                                                                                             |

SCOPING REVIEW PROTOCOL

Scopus Database Search Strategy

| Search line # | PCC conceptual term of interest     | Search term entered into Scopus                                                                                                                                                                                                                                                                                                                                                                                                                                                                                                                                                                                                                                                                                                                                                                                                                                                                                                                                                                                                                                                                                                                                                                                                                                         |
|---------------|-------------------------------------|-------------------------------------------------------------------------------------------------------------------------------------------------------------------------------------------------------------------------------------------------------------------------------------------------------------------------------------------------------------------------------------------------------------------------------------------------------------------------------------------------------------------------------------------------------------------------------------------------------------------------------------------------------------------------------------------------------------------------------------------------------------------------------------------------------------------------------------------------------------------------------------------------------------------------------------------------------------------------------------------------------------------------------------------------------------------------------------------------------------------------------------------------------------------------------------------------------------------------------------------------------------------------|
| 1             | Population (Transition-age youth)   | TITLE-ABS-KEY (youth* or "transition age youth*" or teen* or adolescen* or "emerging adult*" or "young adult*" or "early adult*" or "young person*" or "young people*" or juvenile*)                                                                                                                                                                                                                                                                                                                                                                                                                                                                                                                                                                                                                                                                                                                                                                                                                                                                                                                                                                                                                                                                                    |
| 2             | Population (Serious mental illness) | TITLE-ABS-KEY ("mental disorder*" or "mental illness*" or "psychiatric disabilit*" or "psychiatric disorder*" or "psychiatric diagnosis*" or "serious emotional disturbance*" or "severe emotional disturbance*" or "mental health condition*" or "anxiety disorder*" or phobia* or "phobic disorder*" or "panic disorder*" or "obsessive-compulsive disorder*" or OCD or "bipolar disorder*" or "manic disorder*" or "manic depression" or "dissociative disorder*" or "multiple-personality disorder" or "eating disorder*" or anorexi* or bulimi* or "binge eating*" or "eating disorder not otherwise specified" or EDNOS or "other specified feeding or eating disorder" or OSFED or "disordered eating" or "mood disorder*" or "depressive disorder*" or "affective disorder*" or depression or "cyclothymic disorder*" or cyclothymia or "dysthymic disorder*" or dysthymia or "personality disorder*" or "schizophrenia spectrum disorder*" or schizophrenia or "psychotic disorder*" or psychosis or psychoses or "schizoaffective disorder*" or "psychotic affective disorder*" or "paranoid disorder*" or "somatoform disorder*" or "body dysmorphic disorder*" or "body dysmorphi*" or "post-traumatic stress disorder*" or "adjustment disorder*" or PTSD) |
| 3             | Concept (Resilience)                | TITLE-ABS-KEY (resilienc*)                                                                                                                                                                                                                                                                                                                                                                                                                                                                                                                                                                                                                                                                                                                                                                                                                                                                                                                                                                                                                                                                                                                                                                                                                                              |
| 4             |                                     | 1 and 2 and 3                                                                                                                                                                                                                                                                                                                                                                                                                                                                                                                                                                                                                                                                                                                                                                                                                                                                                                                                                                                                                                                                                                                                                                                                                                                           |
| 5             |                                     | limit 4 to (english language and yr="2000 - Current")                                                                                                                                                                                                                                                                                                                                                                                                                                                                                                                                                                                                                                                                                                                                                                                                                                                                                                                                                                                                                                                                                                                                                                                                                   |
