# Supplementary material for: Understanding resilience among transition-age youth with serious mental illness: protocol for a scoping review
Source: PubMed Central journal article supplement — BMJ Open. 2022 Sep 19;12(9):e059826. doi: 10.1136/bmjopen-2021-059826 (PMC9486183; doi:10.1136/bmjopen-2021-059826), 2022-09-19
Supplement: bmjopen-2021-059826supp002.pdf [file bmjopen-2021-059826supp002.pdf]

## SCOPING REVIEW PROTOCOL

## Appendix B

## Medline Database Search Strategy

| Search line # | PCC conceptual term of interest     | Search term entered into OVID-Medline                                                                                                                                                                                                                                                                                                                                                                                                                                                                                                                                                                                                                                                                                                                                                                                                                                                                                                                                                                                                                                                                                                                                                      |
|---------------|-------------------------------------|--------------------------------------------------------------------------------------------------------------------------------------------------------------------------------------------------------------------------------------------------------------------------------------------------------------------------------------------------------------------------------------------------------------------------------------------------------------------------------------------------------------------------------------------------------------------------------------------------------------------------------------------------------------------------------------------------------------------------------------------------------------------------------------------------------------------------------------------------------------------------------------------------------------------------------------------------------------------------------------------------------------------------------------------------------------------------------------------------------------------------------------------------------------------------------------------|
| 1             | Population (Transition-age youth)   | exp Adolescent/ or exp Young Adult/                                                                                                                                                                                                                                                                                                                                                                                                                                                                                                                                                                                                                                                                                                                                                                                                                                                                                                                                                                                                                                                                                                                                                        |
| 2             | Population (Transition-age youth)   | (youth* or transition age youth* or teen* or adolescen* or emerging adult* or young adult* or early adult* or young person* or young people* or juvenile*).tw,kf.                                                                                                                                                                                                                                                                                                                                                                                                                                                                                                                                                                                                                                                                                                                                                                                                                                                                                                                                                                                                                          |
| 3             | Population (Serious mental illness) | exp Mental Disorders/ or exp Anxiety Disorders/ or exp "Bipolar and Related Disorders"/ or exp Dissociative Disorders/ or exp "Feeding and Eating Disorders"/ or exp Mood Disorders/ or exp "Attention Deficit and Disruptive Behavior Disorders"/ or exp Personality Disorders/ or exp Schizophrenia/ or exp Psychotic Disorders/ or exp Affective Disorders, Psychotic/ or exp Capgras Syndrome/ or exp Delusional Parasitosis/ or exp Morgellons Disease/ or exp Paranoid Disorders/ or exp Somatoform Disorders/ or exp "Trauma and Stressor Related Disorders"/ or exp Mentally Ill Persons/                                                                                                                                                                                                                                                                                                                                                                                                                                                                                                                                                                                          |
| 4             | Population (Serious mental illness) | (mental disorder* or mental illness* or psychiatric disabilit* or psychiatric disorder* or psychiatric diagnosis* or serious emotional disturbance* or severe emotional disturbance* or "mental health condition*" or anxiety disorder* or phobia* or phobic disorder* or panic disorder* or obsessive-compulsive disorder* or OCD or bipolar disorder* or manic disorder* or manic depression or dissociative disorder* or multiple-personality disorder or eating disorder* or anorexi* or bulimi* or binge eating* or "eating disorder not otherwise specified" or EDNOS or "other specified feeding or eating disorder" or OSFED or disordered eating or mood disorder* or depressive disorder* or affective disorder* or depression or cyclothymic disorder* or cyclothymia or dysthymic disorder* or dysthymia or personality disorder* or schizophrenia spectrum disorder* or schizophrenia or psychotic disorder* or psychosis or psychoses or schizoaffective disorder* or psychotic affective disorder* or paranoid disorder* or somatoform disorder* or body dysmorphic disorder* or body dysmorphi* or post-traumatic stress disorder* or adjustment disorder* or PTSD).tw,kf. |
| 5             | Concept (Resilience)                | exp Resilience, Psychological/                                                                                                                                                                                                                                                                                                                                                                                                                                                                                                                                                                                                                                                                                                                                                                                                                                                                                                                                                                                                                                                                                                                                                             |
| 6             | Concept (Resilience)                | (resilienc*).tw,kf.                                                                                                                                                                                                                                                                                                                                                                                                                                                                                                                                                                                                                                                                                                                                                                                                                                                                                                                                                                                                                                                                                                                                                                        |
| 7             |                                     | 1 or 2                                                                                                                                                                                                                                                                                                                                                                                                                                                                                                                                                                                                                                                                                                                                                                                                                                                                                                                                                                                                                                                                                                                                                                                     |
| 8             |                                     | 3 or 4                                                                                                                                                                                                                                                                                                                                                                                                                                                                                                                                                                                                                                                                                                                                                                                                                                                                                                                                                                                                                                                                                                                                                                                     |
| 9             |                                     | 5 or 6                                                                                                                                                                                                                                                                                                                                                                                                                                                                                                                                                                                                                                                                                                                                                                                                                                                                                                                                                                                                                                                                                                                                                                                     |
| 10            |                                     | 7 and 8 and 9                                                                                                                                                                                                                                                                                                                                                                                                                                                                                                                                                                                                                                                                                                                                                                                                                                                                                                                                                                                                                                                                                                                                                                              |
| 11            |                                     | limit 10 to (english language and humans and yr="2000 - Current")                                                                                                                                                                                                                                                                                                                                                                                                                                                                                                                                                                                                                                                                                                                                                                                                                                                                                                                                                                                                                                                                                                                          |

## SCOPING REVIEW PROTOCOL

**Embase Database Search Strategy**

| Search line # | PCC conceptual term of interest     | Search term entered into OVID-Embase                                                                                                                                                                                                                                                                                                                                                                                                                                                                                                                                                                                                                                                                                                                                                                                                                                                                                                                                                                                                                                                                                                                                                       |
|---------------|-------------------------------------|--------------------------------------------------------------------------------------------------------------------------------------------------------------------------------------------------------------------------------------------------------------------------------------------------------------------------------------------------------------------------------------------------------------------------------------------------------------------------------------------------------------------------------------------------------------------------------------------------------------------------------------------------------------------------------------------------------------------------------------------------------------------------------------------------------------------------------------------------------------------------------------------------------------------------------------------------------------------------------------------------------------------------------------------------------------------------------------------------------------------------------------------------------------------------------------------|
| 1             | Population (Transition-age youth)   | exp Adolescent/ or exp Young Adult/                                                                                                                                                                                                                                                                                                                                                                                                                                                                                                                                                                                                                                                                                                                                                                                                                                                                                                                                                                                                                                                                                                                                                        |
| 2             | Population (Transition-age youth)   | (youth* or transition age youth* or teen* or adolescen* or emerging adult* or young adult* or early adult* or young person* or young people* or juvenile*).tw,kf.                                                                                                                                                                                                                                                                                                                                                                                                                                                                                                                                                                                                                                                                                                                                                                                                                                                                                                                                                                                                                          |
| 3             | Population (Serious mental illness) | exp Mental Disease/ or exp Anxiety Disorder/ or exp Bipolar Disorder/ or exp Dissociative Disorder/ or exp Eating Disorder/ or exp Emotional Disorder/ or exp Mood Disorder/ or exp Attention Deficit Disorder/ or exp Impulse Control Disorder/ or exp Neurosis/ or exp Personality Disorder/ or exp Schizophrenia Spectrum Disorder/ or exp Schizophrenia/ or exp Psychosis/ or exp Somatoform Disorder/ or exp Posttraumatic Stress Disorder/                                                                                                                                                                                                                                                                                                                                                                                                                                                                                                                                                                                                                                                                                                                                           |
| 4             | Population (Serious mental illness) | (mental disorder* or mental illness* or psychiatric disabilit* or psychiatric disorder* or psychiatric diagnosis* or serious emotional disturbance* or severe emotional disturbance* or "mental health condition*" or anxiety disorder* or phobia* or phobic disorder* or panic disorder* or obsessive-compulsive disorder* or OCD or bipolar disorder* or manic disorder* or manic depression or dissociative disorder* or multiple-personality disorder or eating disorder* or anorexi* or bulimi* or binge eating* or "eating disorder not otherwise specified" or EDNOS or "other specified feeding or eating disorder" or OSFED or disordered eating or mood disorder* or depressive disorder* or affective disorder* or depression or cyclothymic disorder* or cyclothymia or dysthymic disorder* or dysthymia or personality disorder* or schizophrenia spectrum disorder* or schizophrenia or psychotic disorder* or psychosis or psychoses or schizoaffective disorder* or psychotic affective disorder* or paranoid disorder* or somatoform disorder* or body dysmorphic disorder* or body dysmorphi* or post-traumatic stress disorder* or adjustment disorder* or PTSD).tw,kf. |
| 5             | Concept (Resilience)                | exp Psychological Resilience/                                                                                                                                                                                                                                                                                                                                                                                                                                                                                                                                                                                                                                                                                                                                                                                                                                                                                                                                                                                                                                                                                                                                                              |
| 6             | Concept (Resilience)                | (resilienc*).tw,kf.                                                                                                                                                                                                                                                                                                                                                                                                                                                                                                                                                                                                                                                                                                                                                                                                                                                                                                                                                                                                                                                                                                                                                                        |
| 7             |                                     | 1 or 2                                                                                                                                                                                                                                                                                                                                                                                                                                                                                                                                                                                                                                                                                                                                                                                                                                                                                                                                                                                                                                                                                                                                                                                     |
| 8             |                                     | 3 or 4                                                                                                                                                                                                                                                                                                                                                                                                                                                                                                                                                                                                                                                                                                                                                                                                                                                                                                                                                                                                                                                                                                                                                                                     |
| 9             |                                     | 5 or 6                                                                                                                                                                                                                                                                                                                                                                                                                                                                                                                                                                                                                                                                                                                                                                                                                                                                                                                                                                                                                                                                                                                                                                                     |
| 10            |                                     | 7 and 8 and 9                                                                                                                                                                                                                                                                                                                                                                                                                                                                                                                                                                                                                                                                                                                                                                                                                                                                                                                                                                                                                                                                                                                                                                              |
| 11            |                                     | limit 10 to (english language and humans and yr="2000 - Current")                                                                                                                                                                                                                                                                                                                                                                                                                                                                                                                                                                                                                                                                                                                                                                                                                                                                                                                                                                                                                                                                                                                          |

## SCOPING REVIEW PROTOCOL

**PsychINFO Database Search Strategy**

| Search line # | PCC conceptual term of interest     | Search term entered into OVID-PsychINFO                                                                                                                                                                                                                                                                                                                                                                                                                                                                                                                                                                                                                                                                                                                                                                                                                                                                                                                                                                                                                                                                                                                                                 |
|---------------|-------------------------------------|-----------------------------------------------------------------------------------------------------------------------------------------------------------------------------------------------------------------------------------------------------------------------------------------------------------------------------------------------------------------------------------------------------------------------------------------------------------------------------------------------------------------------------------------------------------------------------------------------------------------------------------------------------------------------------------------------------------------------------------------------------------------------------------------------------------------------------------------------------------------------------------------------------------------------------------------------------------------------------------------------------------------------------------------------------------------------------------------------------------------------------------------------------------------------------------------|
| 1             | Population (Transition-age youth)   | exp Emerging Adulthood/ or exp Early Adolescence/                                                                                                                                                                                                                                                                                                                                                                                                                                                                                                                                                                                                                                                                                                                                                                                                                                                                                                                                                                                                                                                                                                                                       |
| 2             | Population (Transition-age youth)   | (youth* or transition age youth* or teen* or adolescen* or emerging adult* or young adult* or early adult* or young person* or young people* or juvenile*).tw.                                                                                                                                                                                                                                                                                                                                                                                                                                                                                                                                                                                                                                                                                                                                                                                                                                                                                                                                                                                                                          |
| 3             | Population (Serious mental illness) | exp Mental Disorders/ or exp Chronic Mental Illness or exp Serious Mental Illness/ or exp Affective Disorders or exp Anxiety Disorders/ or exp Attention Deficit Disorder/ or exp Bipolar Disorder/ or exp Dissociative Disorders/ or exp Disruptive Behavior Disorders/ or exp Eating Disorders/ or exp Personality Disorders/ or exp Psychosis/ or exp Schizophrenia/ or exp Somatoform Disorders/ or exp "Stress and Trauma Related Disorders"/                                                                                                                                                                                                                                                                                                                                                                                                                                                                                                                                                                                                                                                                                                                                      |
| 4             | Population (Serious mental illness) | (mental disorder* or mental illness* or psychiatric disabilit* or psychiatric disorder* or psychiatric diagnosis* or serious emotional disturbance* or severe emotional disturbance* or "mental health condition*" or anxiety disorder* or phobia* or phobic disorder* or panic disorder* or obsessive-compulsive disorder* or OCD or bipolar disorder* or manic disorder* or manic depression or dissociative disorder* or multiple-personality disorder or eating disorder* or anorexi* or bulimi* or binge eating* or "eating disorder not otherwise specified" or EDNOS or "other specified feeding or eating disorder" or OSFED or disordered eating or mood disorder* or depressive disorder* or affective disorder* or depression or cyclothymic disorder* or cyclothymia or dysthymic disorder* or dysthymia or personality disorder* or schizophrenia spectrum disorder* or schizophrenia or psychotic disorder* or psychosis or psychoses or schizoaffective disorder* or psychotic affective disorder* or paranoid disorder* or somatoform disorder* or body dysmorphic disorder* or body dysmorphi* or post-traumatic stress disorder* or adjustment disorder* or PTSD).tw. |
| 5             | Concept (Resilience)                | exp "Resilience (Psychological)"/                                                                                                                                                                                                                                                                                                                                                                                                                                                                                                                                                                                                                                                                                                                                                                                                                                                                                                                                                                                                                                                                                                                                                       |
| 6             | Concept (Resilience)                | (resilienc*).tw.                                                                                                                                                                                                                                                                                                                                                                                                                                                                                                                                                                                                                                                                                                                                                                                                                                                                                                                                                                                                                                                                                                                                                                        |
| 7             |                                     | 1 or 2                                                                                                                                                                                                                                                                                                                                                                                                                                                                                                                                                                                                                                                                                                                                                                                                                                                                                                                                                                                                                                                                                                                                                                                  |
| 8             |                                     | 3 or 4                                                                                                                                                                                                                                                                                                                                                                                                                                                                                                                                                                                                                                                                                                                                                                                                                                                                                                                                                                                                                                                                                                                                                                                  |
| 9             |                                     | 5 or 6                                                                                                                                                                                                                                                                                                                                                                                                                                                                                                                                                                                                                                                                                                                                                                                                                                                                                                                                                                                                                                                                                                                                                                                  |
| 10            |                                     | 7 and 8 and 9                                                                                                                                                                                                                                                                                                                                                                                                                                                                                                                                                                                                                                                                                                                                                                                                                                                                                                                                                                                                                                                                                                                                                                           |
| 11            |                                     | limit 10 to (english language and humans and yr="2000 - Current")                                                                                                                                                                                                                                                                                                                                                                                                                                                                                                                                                                                                                                                                                                                                                                                                                                                                                                                                                                                                                                                                                                                       |

## SCOPING REVIEW PROTOCOL

**AMED Database Search Strategy**

| Search line # | PCC conceptual term of interest     | Search term entered into OVID-AMED                                                                                                                                                                                                                                                                                                                                                                                                                                                                                                                                                                                                                                                                                                                                                                                                                                                                                                                                                                                                                                                                                                                                                         |
|---------------|-------------------------------------|--------------------------------------------------------------------------------------------------------------------------------------------------------------------------------------------------------------------------------------------------------------------------------------------------------------------------------------------------------------------------------------------------------------------------------------------------------------------------------------------------------------------------------------------------------------------------------------------------------------------------------------------------------------------------------------------------------------------------------------------------------------------------------------------------------------------------------------------------------------------------------------------------------------------------------------------------------------------------------------------------------------------------------------------------------------------------------------------------------------------------------------------------------------------------------------------|
| 1             | Population (Transition-age youth)   | exp Adolescent/                                                                                                                                                                                                                                                                                                                                                                                                                                                                                                                                                                                                                                                                                                                                                                                                                                                                                                                                                                                                                                                                                                                                                                            |
| 2             | Population (Transition-age youth)   | (youth* or transition age youth* or teen* or adolescen* or emerging adult* or young adult* or early adult* or young person* or young people* or juvenile*).tw,et.                                                                                                                                                                                                                                                                                                                                                                                                                                                                                                                                                                                                                                                                                                                                                                                                                                                                                                                                                                                                                          |
| 3             | Population (Serious mental illness) | exp Mental Disorders/ or exp Adjustment Disorders/ or exp Affective Disorders/ or exp Affective Disorders Psychotic/ or exp Bipolar Disorder/ or exp Manic Disorder/ or exp Depressive Disorder/ or exp Mood Disorders/ or exp Anxiety Disorders/ or exp Obsessive Compulsive Disorder/ or exp Phobic Disorders/ or exp Stress Disorders Post Traumatic/ or exp Attention Deficit Disorder with Hyperactivity or exp Child Behavior Disorders/ or exp Dissociative Disorders/ or exp Multiple Personality Disorder/ or exp Eating Disorders/ or exp Anorexia Nervosa/ or exp Bulimia/ or exp Neurotic Disorders/ or exp Personality Disorders/ or exp Borderline Personality Disorder/ or exp Hysteria/ or exp Psychotic Disorders/ or exp Schizophrenia/ or exp Somatoform Disorders/ or exp Conversion Disorder/                                                                                                                                                                                                                                                                                                                                                                         |
| 4             | Population (Serious mental illness) | (mental disorder* or mental illness* or psychiatric disabilit* or psychiatric disorder* or psychiatric diagnosis* or serious emotional disturbance* or severe emotional disturbance* or "mental health condition*" or anxiety disorder* or phobia* or phobic disorder* or panic disorder* or obsessive-compulsive disorder* or OCD or bipolar disorder* or manic disorder* or manic depression or dissociative disorder* or multiple-personality disorder or eating disorder* or anorexi* or bulimi* or binge eating* or "eating disorder not otherwise specified" or EDNOS or "other specified feeding or eating disorder" or OSFED or disordered eating or mood disorder* or depressive disorder* or affective disorder* or depression or cyclothymic disorder* or cyclothymia or dysthymic disorder* or dysthymia or personality disorder* or schizophrenia spectrum disorder* or schizophrenia or psychotic disorder* or psychosis or psychoses or schizoaffective disorder* or psychotic affective disorder* or paranoid disorder* or somatoform disorder* or body dysmorphic disorder* or body dysmorphi* or post-traumatic stress disorder* or adjustment disorder* or PTSD).tw,et. |
| 5             | Concept (Resilience)                | exp Adaptation Psychological/                                                                                                                                                                                                                                                                                                                                                                                                                                                                                                                                                                                                                                                                                                                                                                                                                                                                                                                                                                                                                                                                                                                                                              |
| 6             | Concept (Resilience)                | (resilienc*).tw,et.                                                                                                                                                                                                                                                                                                                                                                                                                                                                                                                                                                                                                                                                                                                                                                                                                                                                                                                                                                                                                                                                                                                                                                        |
| 7             |                                     | 1 or 2                                                                                                                                                                                                                                                                                                                                                                                                                                                                                                                                                                                                                                                                                                                                                                                                                                                                                                                                                                                                                                                                                                                                                                                     |
| 8             |                                     | 3 or 4                                                                                                                                                                                                                                                                                                                                                                                                                                                                                                                                                                                                                                                                                                                                                                                                                                                                                                                                                                                                                                                                                                                                                                                     |
| 9             |                                     | 5 or 6                                                                                                                                                                                                                                                                                                                                                                                                                                                                                                                                                                                                                                                                                                                                                                                                                                                                                                                                                                                                                                                                                                                                                                                     |
| 10            |                                     | 7 and 8 and 9                                                                                                                                                                                                                                                                                                                                                                                                                                                                                                                                                                                                                                                                                                                                                                                                                                                                                                                                                                                                                                                                                                                                                                              |
| 11            |                                     | limit 10 to (english and yr="2000 -Current")                                                                                                                                                                                                                                                                                                                                                                                                                                                                                                                                                                                                                                                                                                                                                                                                                                                                                                                                                                                                                                                                                                                                               |

## SCOPING REVIEW PROTOCOL

## CINHAL Database Search Strategy

| Search line # | PCC conceptual term of interest     | Search term entered into CINHAL (EBSCO)                                                                                                                                                                                                                                                                                                                                                                                                                                                                                                                                                                                                                                                                                                                                                                                                                                                                                                                                                                                                                                                                                                                                                                                                                                                                                                                                                                                                                                                                                                                        |
|---------------|-------------------------------------|----------------------------------------------------------------------------------------------------------------------------------------------------------------------------------------------------------------------------------------------------------------------------------------------------------------------------------------------------------------------------------------------------------------------------------------------------------------------------------------------------------------------------------------------------------------------------------------------------------------------------------------------------------------------------------------------------------------------------------------------------------------------------------------------------------------------------------------------------------------------------------------------------------------------------------------------------------------------------------------------------------------------------------------------------------------------------------------------------------------------------------------------------------------------------------------------------------------------------------------------------------------------------------------------------------------------------------------------------------------------------------------------------------------------------------------------------------------------------------------------------------------------------------------------------------------|
| 1             | Population (Transition-age youth)   | (MH "Adolescence+") OR (MH "Young Adult")                                                                                                                                                                                                                                                                                                                                                                                                                                                                                                                                                                                                                                                                                                                                                                                                                                                                                                                                                                                                                                                                                                                                                                                                                                                                                                                                                                                                                                                                                                                      |
| 2             | Population (Transition-age youth)   | TI (youth* or "transition age youth*" or teen* or adolescen* or "emerging adult*" or "young adult*" or "early adult*" or "young person*" or "young people*" or juvenile*) OR AB (youth* or "transition age youth*" or teen* or adolescen* or "emerging adult*" or "young adult*" or "early adult*" or "young person*" or "young people*" or juvenile*)                                                                                                                                                                                                                                                                                                                                                                                                                                                                                                                                                                                                                                                                                                                                                                                                                                                                                                                                                                                                                                                                                                                                                                                                         |
| 3             | Population (Serious mental illness) | (MH "Mental Disorders+") or (MH "Mental Disorders, Chronic") or (MH "Neurotic Disorders+") or (MH "Affective Disorders+") or (MH "Seasonal Affective Disorder") or (MH "Depression+") or (MH "Anxiety Disorders+") or (MH "Social Anxiety Disorders") or (MH "Generalized Anxiety Disorder") or (MH "Panic Disorder") or (MH "Obsessive-Compulsive Disorder+") or (MH "Phobic Disorders+") or (MH "Stress Disorders, Post-Traumatic+") or (MH "Psychotic Disorders+") or (MH "Schizophrenia+") or (MH "Affective Disorders, Psychotic+") or (MH "Bipolar Disorders+") or (MH "Dissociative Disorders+") or (MH "Multiple-Personality Disorder") or (MH "Personality Disorders+") or (MH "Adjustment Disorders+") or (MH "Attention Deficit Hyperactivity Disorder") or (MH "Child Behavior Disorders+") or (MH "Eating Disorders+") or (MH "Binge Eating Disorder") or (MH "Avoidant Restrictive Food Intake Disorder") or (MH "Bulimia Nervosa") or (MH "Bulimia") or (MH "Anorexia Nervosa") or (MH "Anorexia") or (MH "Somatoform Disorders+") or (MH "Body Dysmorphic Disorder")                                                                                                                                                                                                                                                                                                                                                                                                                                                                           |
| 4             | Population (Serious mental illness) | TI ("mental disorder*" or "mental illness*" or "psychiatric disabilit*" or "psychiatric disorder*" or "psychiatric diagnosis*" or "serious emotional disturbance*" or "severe emotional disturbance*" or "mental health condition*" or "anxiety disorder*" or phobia* or "phobic disorder*" or "panic disorder*" or "obsessive-compulsive disorder*" or OCD or "bipolar disorder*" or "manic disorder*" or "manic depression" or "dissociative disorder*" or "multiple-personality disorder" or "eating disorder*" or anorexi* or bulimi* or "binge eating*" or "eating disorder not otherwise specified" or EDNOS or "other specified feeding or eating disorder" or OSFED or "disordered eating" or "mood disorder*" or "depressive disorder*" or "affective disorder*" or depression or "cyclothymic disorder*" or cyclothymia or "dysthymic disorder*" or dysthymia or "personality disorder*" or "schizophrenia spectrum disorder*" or schizophrenia or "psychotic disorder*" or psychosis or psychoses or "schizoaffective disorder*" or "psychotic affective disorder*" or "paranoid disorder*" or "somatoform disorder*" or "body dysmorphic disorder*" or "body dysmorphi*" or "post-traumatic stress disorder*" or "adjustment disorder*" or PTSD) OR AB ("mental disorder*" or "mental illness*" or "psychiatric disabilit*" or "psychiatric disorder*" or "psychiatric diagnosis*" or "serious emotional disturbance*" or "severe emotional disturbance*" or "mental health condition*" or "anxiety disorder*" or phobia* or "phobic disorder*" or |

## SCOPING REVIEW PROTOCOL

|    |                      |                                                                                                                                                                                                                                                                                                                                                                                                                                                                                                                                                                                                                                                                                                                                                                                                                                                                                                                                                               |
|----|----------------------|---------------------------------------------------------------------------------------------------------------------------------------------------------------------------------------------------------------------------------------------------------------------------------------------------------------------------------------------------------------------------------------------------------------------------------------------------------------------------------------------------------------------------------------------------------------------------------------------------------------------------------------------------------------------------------------------------------------------------------------------------------------------------------------------------------------------------------------------------------------------------------------------------------------------------------------------------------------|
|    |                      | “panic disorder*” or “obsessive-compulsive disorder*” or OCD or “bipolar disorder*” or “manic disorder*” or “manic depression” or “dissociative disorder*” or “multiple-personality disorder” or “eating disorder*” or anorexi* or bulimi* or “binge eating*” or “eating disorder not otherwise specified” or EDNOS or “other specified feeding or eating disorder” or OSFED or “disordered eating” or “mood disorder*” or “depressive disorder*” or “affective disorder*” or depression or “cyclothymic disorder*” or cyclothymia or “dysthymic disorder*” or dysthymia or “personality disorder*” or “schizophrenia spectrum disorder*” or schizophrenia or “psychotic disorder*” or psychosis or psychoses or “schizoaffective disorder*” or “psychotic affective disorder*” or “paranoid disorder*” or “somatoform disorder*” or “body dysmorphic disorder*” or “body dysmorphi*” or “post-traumatic stress disorder*” or “adjustment disorder*” or PTSD) |
| 5  | Concept (Resilience) | (MH “Hardiness”)                                                                                                                                                                                                                                                                                                                                                                                                                                                                                                                                                                                                                                                                                                                                                                                                                                                                                                                                              |
| 6  | Concept (Resilience) | TI (resilienc*) OR AB (resilienc*)                                                                                                                                                                                                                                                                                                                                                                                                                                                                                                                                                                                                                                                                                                                                                                                                                                                                                                                            |
| 7  |                      | 1 or 2                                                                                                                                                                                                                                                                                                                                                                                                                                                                                                                                                                                                                                                                                                                                                                                                                                                                                                                                                        |
| 8  |                      | 3 or 4                                                                                                                                                                                                                                                                                                                                                                                                                                                                                                                                                                                                                                                                                                                                                                                                                                                                                                                                                        |
| 9  |                      | 5 or 6                                                                                                                                                                                                                                                                                                                                                                                                                                                                                                                                                                                                                                                                                                                                                                                                                                                                                                                                                        |
| 10 |                      | 7 and 8 and 9                                                                                                                                                                                                                                                                                                                                                                                                                                                                                                                                                                                                                                                                                                                                                                                                                                                                                                                                                 |
| 11 |                      | limit 10 to (english language and humans and yr="2000 - Current")                                                                                                                                                                                                                                                                                                                                                                                                                                                                                                                                                                                                                                                                                                                                                                                                                                                                                             |

## SCOPING REVIEW PROTOCOL

**Scopus Database Search Strategy**

| Search line # | PCC conceptual term of interest     | Search term entered into Scopus                                                                                                                                                                                                                                                                                                                                                                                                                                                                                                                                                                                                                                                                                                                                                                                                                                                                                                                                                                                                                                                                                                                                                                                                                                         |
|---------------|-------------------------------------|-------------------------------------------------------------------------------------------------------------------------------------------------------------------------------------------------------------------------------------------------------------------------------------------------------------------------------------------------------------------------------------------------------------------------------------------------------------------------------------------------------------------------------------------------------------------------------------------------------------------------------------------------------------------------------------------------------------------------------------------------------------------------------------------------------------------------------------------------------------------------------------------------------------------------------------------------------------------------------------------------------------------------------------------------------------------------------------------------------------------------------------------------------------------------------------------------------------------------------------------------------------------------|
| 1             | Population (Transition-age youth)   | TITLE-ABS-KEY (youth* or "transition age youth*" or teen* or adolescen* or "emerging adult*" or "young adult*" or "early adult*" or "young person*" or "young people*" or juvenile*)                                                                                                                                                                                                                                                                                                                                                                                                                                                                                                                                                                                                                                                                                                                                                                                                                                                                                                                                                                                                                                                                                    |
| 2             | Population (Serious mental illness) | TITLE-ABS-KEY ("mental disorder*" or "mental illness*" or "psychiatric disabilit*" or "psychiatric disorder*" or "psychiatric diagnosis*" or "serious emotional disturbance*" or "severe emotional disturbance*" or "mental health condition*" or "anxiety disorder*" or phobia* or "phobic disorder*" or "panic disorder*" or "obsessive-compulsive disorder*" or OCD or "bipolar disorder*" or "manic disorder*" or "manic depression" or "dissociative disorder*" or "multiple-personality disorder" or "eating disorder*" or anorexi* or bulimi* or "binge eating*" or "eating disorder not otherwise specified" or EDNOS or "other specified feeding or eating disorder" or OSFED or "disordered eating" or "mood disorder*" or "depressive disorder*" or "affective disorder*" or depression or "cyclothymic disorder*" or cyclothymia or "dysthymic disorder*" or dysthymia or "personality disorder*" or "schizophrenia spectrum disorder*" or schizophrenia or "psychotic disorder*" or psychosis or psychoses or "schizoaffective disorder*" or "psychotic affective disorder*" or "paranoid disorder*" or "somatoform disorder*" or "body dysmorphic disorder*" or "body dysmorphi*" or "post-traumatic stress disorder*" or "adjustment disorder*" or PTSD) |
| 3             | Concept (Resilience)                | TITLE-ABS-KEY (resilienc*)                                                                                                                                                                                                                                                                                                                                                                                                                                                                                                                                                                                                                                                                                                                                                                                                                                                                                                                                                                                                                                                                                                                                                                                                                                              |
| 4             |                                     | 1 and 2 and 3                                                                                                                                                                                                                                                                                                                                                                                                                                                                                                                                                                                                                                                                                                                                                                                                                                                                                                                                                                                                                                                                                                                                                                                                                                                           |
| 5             |                                     | limit 4 to (english language and yr="2000 - Current")                                                                                                                                                                                                                                                                                                                                                                                                                                                                                                                                                                                                                                                                                                                                                                                                                                                                                                                                                                                                                                                                                                                                                                                                                   |
